# Supplementary material for: Enantioselective synthesis of α,α-disubstituted α-amino acids via direct catalytic asymmetric addition of acetonitrile to α-iminoesters
Source: Royal Society of Chemistry journal article supplement (doi:10.1039/c6ob01874b), 2016-01-01

# Enantioselective synthesis of $\alpha,\alpha$ -disubstituted $\alpha$ -amino acids via direct catalytic asymmetric addition of acetonitrile to $\alpha$ -iminoesters

Shaoquan Lin, Naoya Kumagai,\* and Masakatsu Shibasaki\*

*Institute of Microbial Chemistry (BIKAKEN), Tokyo, Japan*

mshibasa@bikaken.or.jp, nkumagai@bikaken.or.jp

---

## contents

|                                                                                                                     |           |
|---------------------------------------------------------------------------------------------------------------------|-----------|
| <b>1. General</b>                                                                                                   | <b>2</b>  |
| <b>2. Instrumentation</b>                                                                                           | <b>2</b>  |
| <b>3. Materials</b>                                                                                                 | <b>2</b>  |
| <b>4. General Procedure and Characterization of the Products</b>                                                    | <b>5</b>  |
| 4.1. Ligand screening.                                                                                              | 5         |
| 4.2. Catalytic asymmetric Mannich-type reaction of $\alpha,\beta$ -unsaturated $\gamma$ -butyrolactam to ketimines. | 5         |
| 4.3. Transformation of the Mannich product.                                                                         | 13        |
| <b>5. Kinetic Experiments</b>                                                                                       | <b>14</b> |
| 5.1 Determination of the reaction order in ketimine.                                                                | 14        |
| 5.2 Determination of the reaction order in MeCN.                                                                    | 16        |
| 5.3 Determination of the reaction order in catalyst.                                                                | 17        |
| <b>6. Kinetic Isotope Effects</b>                                                                                   | <b>18</b> |
| <b>7. Determination of Absolute Configuration</b>                                                                   | <b>19</b> |
| <b>8. NMR Spectra of New Compounds</b>                                                                              | <b>20</b> |

## 1. General

The enantioselective synthesis of  $\alpha,\alpha$ -disubstituted  $\alpha$ -amino acids via direct catalytic asymmetric addition of acetonitrile to  $\alpha$ -iminoesters was performed in a flame-dried 20 mL glass test tube with a Teflon-coated magnetic stirring bar unless otherwise noted. The flasks or test tubes were fitted with a 3-way glass stopcock and reactions were run under an Ar atmosphere. Air- and moisture-sensitive liquids were transferred via a gas-tight syringe and a stainless-steel needle. All work-up and purification procedures were carried out with reagent-grade solvents under ambient atmosphere.

## 2. Instrumentation

Infrared (IR) spectra were recorded on a HORIBA FT210 Fourier transform infrared spectrophotometer. NMR was recorded on Bruker AVANCE III HD400. Chemical shifts for proton are reported in parts per million downfield from tetramethylsilane and are referenced to residual protium in the NMR solvent (TMS in  $\text{CDCl}_3$ :  $\delta$  0.00 ppm;  $\text{CD}_3\text{CN}$ :  $\delta$  1.94 ppm). For  $^{13}\text{C}$  NMR, chemical shifts were reported in the scale relative to NMR solvent ( $\text{CDCl}_3$ :  $\delta$  77.0 ppm;  $\text{CD}_3\text{CN}$ :  $\delta$  118.26 ppm) as an internal reference. For  $^{31}\text{P}$  NMR, chemical shifts were reported in the scale relative to  $\text{OP}(\text{OPh})_3$  ( $\delta$  -17.6035 ppm in  $\text{CDCl}_3$ ) as an external reference. For  $^{19}\text{F}$  NMR, chemical shifts were reported in the scale relative to  $\text{PhCF}_3$  ( $\delta$  -62.7680 ppm in  $\text{CDCl}_3$ ) as an external reference. NMR data are reported as follows: chemical shifts, multiplicity (s: singlet, d: doublet, dd: doublet of doublets, t: triplet, q: quartet, m: multiplet, br: broad signal), coupling constant (Hz), and integration. Optical rotation was measured using a 1 mL cell with a 1.0 dm path length on a JASCO polarimeter P-1030. High-resolution mass spectra (ESI TOF (+)) were measured on Thermo Fisher Scientific LTQ Orbitrap XL. HPLC analysis was conducted on a JASCO HPLC system equipped with Daicel chiral-stationary-phase columns ( $\phi$  0.46 cm x 25 cm).

## 3. Materials

Unless otherwise noted, materials were purchased from commercial suppliers and were used without further purification. THF, MeCN were purified by passing through a solvent purification system (Glass Contour). MS 4A was purchased from Nacalai Tesque Co. Ltd. and dried by microwave oven three time under reduced pressure. Barton's base and  $[\text{Rh}(\text{cod})(\text{OMe})_2]$  were purchased from Aldrich.  $[\text{Ir}(\text{cod})(\text{OMe})_2]$  was purchased from TCI Co. Ltd. and used as received (opened and handled in a dry box). Column chromatography was performed with silica gel Merck 60 (230-400 mesh ASTM) or silicagel 60 N (spherical, neutral, 40-50  $\mu\text{m}$ ) from Kanto Chemical Co. Ltd. Preparative TLC plates (1.05744.0001, PLC Silica gel 60 F<sub>254</sub>, 0.5 mm) were purchased from Merck. *N*-thiophosphinoyl ketimines were prepared according to a modified reported procedure.<sup>1</sup> *N*-heterocyclic carbene (NHC) ligands were synthesised by following the reported precedures.<sup>2</sup>

### Methyl 2-((diphenylphosphorothioyl)imino)-2-phenylacetate (4b)

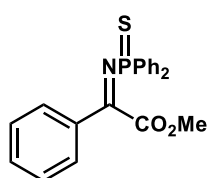

Yellow crystal; M. p. 144–145 °C; IR (KBr):  $\nu$  1735, 1631, 1591  $\text{cm}^{-1}$ ;  $^1\text{H}$  NMR (400 MHz,  $\text{CDCl}_3$ ):  $\delta$  8.06–8.00 (m, 4H), 7.95–7.93 (m, 2H), 7.61–7.57 (m, 1H), 7.51–7.71 (m, 8H), 3.97 (s, 3H);  $^{13}\text{C}$  NMR (100 MHz,  $\text{CDCl}_3$ ):  $\delta$  169.6 (d,  $J$  = 9.0 Hz), 165.0 (d,  $J$  = 17.1 Hz), 135.6, 134.5, 134.2, 134.0, 133.8, 131.51, 131.48, 131.4, 131.3, 129.0, 128.9, 128.5, 128.3, 52.4;  $^{31}\text{P}$  NMR ( $\text{CDCl}_3$ ):  $\delta$  52.0; HRMS (ESI) Anal. calcd. for  $\text{C}_{21}\text{H}_{18}\text{O}_2\text{NNaPS}$   $m/z$  402.0688  $[\text{M}+\text{Na}]^+$ , found 402.0680.

### Isopropyl 2-((diphenylphosphorothioyl)imino)-2-phenylacetate (4c)

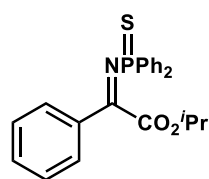

Yellow crystal; M. p. 105–106 °C; IR (KBr):  $\nu$  1726, 1631, 1612  $\text{cm}^{-1}$ ;  $^1\text{H}$  NMR (400 MHz,  $\text{CDCl}_3$ ):  $\delta$  8.06–8.01 (m, 4H), 7.95–7.93 (m, 2H), 7.60–7.56 (m, 1H), 7.50–7.41 (m, 8H), 5.43–5.34 (m, 1H), 1.39 (d,  $J$  = 6.3 Hz, 6H);  $^{13}\text{C}$  NMR (100 MHz,  $\text{CDCl}_3$ ):  $\delta$  170.0 (d,  $J$  = 8.7 Hz), 164.0 (d,  $J$  = 16.8 Hz), 135.9, 134.8, 134.6, 134.4, 133.6, 131.39, 131.36, 131.28, 129.0, 128.9, 128.4, 128.3, 71.2, 21.6;  $^{31}\text{P}$  NMR ( $\text{CDCl}_3$ ):  $\delta$  51.5; HRMS (ESI) Anal. calcd. for  $\text{C}_{23}\text{H}_{22}\text{O}_2\text{NNaPS}$   $m/z$  430.1001  $[\text{M}+\text{Na}]^+$ , found 430.0997.

1 (a) Jennings, W. B.; Lovely, C. J. *Tetrahedron Lett.* **1988**, 29, 3725; (b) Jennings, W. B.; Lovely, C. J. *Tetrahedron* **1991**, 47, 5561.

2 (a) Vora, H. U.; Lathrop, S. P.; Reynolds, N. T.; Kerr, M. S.; Read de Alaniz, J.; Rovis, T. *Org. Synth.* **2010**, 87, 350; (b) Zhao, C.; Li, F.; Wang, J. *Angew. Chem. Int. Ed.* **2016**, 55, 1820.

***tert*-Butyl 2-((diphenylphosphorothioyl)imino)-2-phenylacetate (4d)**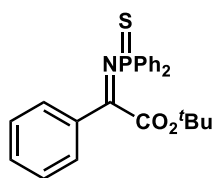

Yellow crystal; M. p. 138–140 °C; IR (KBr):  $\nu$  1725, 1682, 1645  $\text{cm}^{-1}$ ;  $^1\text{H}$  NMR (400 MHz,  $\text{CDCl}_3$ ):  $\delta$  8.06–8.01 (m, 4H), 7.98–7.96 (m, 2H), 7.59–7.55 (m, 1H), 7.50–7.40 (m, 8H), 1.60 (s, 9H);  $^{13}\text{C}$  NMR (100 MHz,  $\text{CDCl}_3$ ):  $\delta$  170.0 (d,  $J$  = 8.5 Hz), 163.2 (d,  $J$  = 16.3 Hz), 136.2, 135.2, 135.1, 135.0, 133.3, 131.36, 131.28, 131.25, 129.0, 128.8, 128.4, 128.2, 85.6, 28.2;  $^{31}\text{P}$  NMR ( $\text{CDCl}_3$ ):  $\delta$  50.9; HRMS (ESI) Anal. calcd. for  $\text{C}_{24}\text{H}_{24}\text{O}_2\text{N}_2\text{NaPS}$   $m/z$  444.1158  $[\text{M}+\text{Na}]^+$ , found 444.1155.

**Adamantan-1-yl 2-((diphenylphosphorothioyl)imino)-2-phenylacetate (4e)**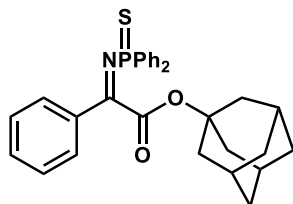

Yellow crystal; M. p. 187–189 °C; IR (KBr):  $\nu$  1726, 1639  $\text{cm}^{-1}$ ;  $^1\text{H}$  NMR (400 MHz,  $\text{CDCl}_3$ ):  $\delta$  8.06–7.97 (m, 6H), 7.59–7.55 (m, 1H), 7.50–7.40 (m, 8H), 2.32 (d,  $J$  = 2.7 Hz, 6H), 2.21 (s, 3H), 1.73–1.74 (m, 6H);  $^{13}\text{C}$  NMR (100 MHz,  $\text{CDCl}_3$ ):  $\delta$  169.7 (d,  $J$  = 8.4 Hz), 163.1 (d,  $J$  = 16.4 Hz), 136.1, 135.2, 135.1, 134.9, 133.3, 131.4, 131.29, 131.28, 131.24, 139.1, 128.7, 128.4, 128.2, 85.9, 41.5, 36.0, 31.1;  $^{31}\text{P}$  NMR ( $\text{CDCl}_3$ ):  $\delta$  51.0; HRMS (ESI) Anal. calcd. for  $\text{C}_{30}\text{H}_{31}\text{O}_2\text{N}_2\text{PS}$   $m/z$  500.1808  $[\text{M}+\text{H}]^+$ , found 500.1805.

**Ethyl 2-((diphenylphosphorothioyl)imino)-2-(*o*-tolyl)acetate (4f)**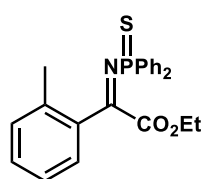

Yellow crystal; M. p. 111–112 °C; IR (KBr):  $\nu$  1734, 1644  $\text{cm}^{-1}$ ;  $^1\text{H}$  NMR (400 MHz,  $\text{CDCl}_3$ ):  $\delta$  8.01–7.96 (m, 4H), 7.56 (d,  $J$  = 7.8 Hz, 2H), 7.47–7.36 (m, 7H), 7.27–7.22 (m, 1H), 4.40 (q,  $J$  = 7.2 Hz, 2H), 2.44 (s, 3H), 1.31 (d,  $J$  = 7.2 Hz, 3H);  $^{13}\text{C}$  NMR (100 MHz,  $\text{CDCl}_3$ ):  $\delta$  172.4 (d,  $J$  = 10.5 Hz), 164.5 (d,  $J$  = 19.0 Hz), 138.9, 135.4, 134.4, 134.2, 134.0, 132.0, 131.77, 131.51, 131.42, 131.40, 130.2, 128.4, 128.2, 126.0, 62.2, 21.7, 13.7;  $^{31}\text{P}$  NMR ( $\text{CDCl}_3$ ):  $\delta$  52.6; HRMS (ESI) Anal. calcd. for  $\text{C}_{23}\text{H}_{22}\text{O}_2\text{N}_2\text{NaPS}$   $m/z$  430.1001  $[\text{M}+\text{Na}]^+$ , found 430.0993.

**Ethyl 2-((diphenylphosphorothioyl)imino)-2-(4-(trifluoromethyl)phenyl)acetate (4n)**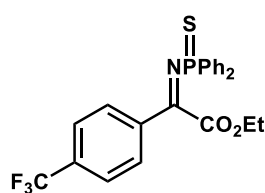

Yellow crystal; M. p. 146–148 °C; IR (KBr):  $\nu$  1733, 1638  $\text{cm}^{-1}$ ;  $^1\text{H}$  NMR (400 MHz,  $\text{CDCl}_3$ ):  $\delta$  8.07–7.99 (m, 6H), 7.75 (d,  $J$  = 8.3 Hz, 2H), 7.51–7.43 (m, 6H), 4.48 (q,  $J$  = 7.2 Hz, 2H), 1.34 (t,  $J$  = 7.2 Hz, 3H);  $^{13}\text{C}$  NMR (100 MHz,  $\text{CDCl}_3$ ):  $\delta$  168.5 (d,  $J$  = 8.4 Hz), 164.0 (d,  $J$  = 16.5 Hz), 137.4, 137.2, 135.2, 135.0, 134.6, 134.1, 131.69, 131.66, 131.4, 131.3, 129.2, 128.5, 128.4, 127.5, 125.90, 125.86, 125.82, 124.8, 122.1, 119.4, 62.6, 13.7;  $^{19}\text{F}$  NMR (375 MHz,  $\text{CDCl}_3$ ):  $\delta$  -63.2;  $^{31}\text{P}$  NMR ( $\text{CDCl}_3$ ):  $\delta$  52.9; HRMS (ESI) Anal. calcd. for  $\text{C}_{23}\text{H}_{19}\text{O}_2\text{NF}_3\text{NaPS}$   $m/z$  484.0718  $[\text{M}+\text{Na}]^+$ , found 484.0716.

**Ethyl 2-(3-chloro-4-methylphenyl)-2-((diphenylphosphorothioyl)imino)acetate (4p)**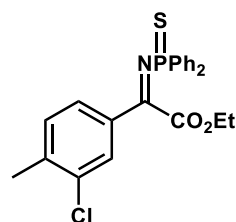

Yellow crystal; M. p. 112–114 °C; IR (KBr):  $\nu$  1742, 1639  $\text{cm}^{-1}$ ;  $^1\text{H}$  NMR (400 MHz,  $\text{CDCl}_3$ ):  $\delta$  8.04–7.98 (m, 4H), 7.93 (d,  $J$  = 1.8 Hz, 1H), 7.70 (dd,  $J$  = 1.8, 8.0 Hz, 1H), 7.50–7.42 (m, 6H), 7.34 (d,  $J$  = 8.0 Hz, 1H), 4.46 (q,  $J$  = 7.2 Hz, 2H), 2.45 (s, 3H), 1.33 (t,  $J$  = 7.2 Hz, 3H);  $^{13}\text{C}$  NMR (100 MHz,  $\text{CDCl}_3$ ):  $\delta$  168.6 (d,  $J$  = 8.5 Hz), 164.2 (d,  $J$  = 16.7 Hz), 142.6, 135.5, 135.3, 134.5, 133.7, 133.5, 131.51, 131.49, 131.38, 131.33, 131.27, 129.2, 128.5, 128.3, 127.3, 62.4, 20.5, 13.7;  $^{31}\text{P}$  NMR ( $\text{CDCl}_3$ ):  $\delta$  52.2; HRMS (ESI) Anal. calcd. for  $\text{C}_{23}\text{H}_{21}\text{O}_2\text{N}_2\text{ClNaPS}$   $m/z$  464.0611  $[\text{M}+\text{Na}]^+$ , found 464.0602.

**Ethyl 2-((diphenylphosphorothioyl)imino)-2-(thiophen-2-yl)acetate (4v)**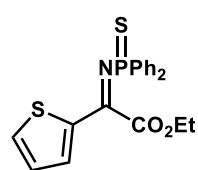

White crystal; M. p. 114–115 °C; IR (KBr):  $\nu$  1731, 1620  $\text{cm}^{-1}$ ;  $^1\text{H}$  NMR (400 MHz,  $\text{CDCl}_3$ ):  $\delta$  8.04–7.98 (m, 4H), 7.69 (dd,  $J$  = 0.8, 5.0 Hz, 1H), 7.59 (dd,  $J$  = 0.9, 3.8 Hz, 1H), 7.46–7.41 (m, 6H), 7.16–7.14 (m, 1H), 4.44 (q,  $J$  = 7.2 Hz, 2H), 1.33 (t,  $J$  = 7.2 Hz, 3H);  $^{13}\text{C}$  NMR (100 MHz,  $\text{CDCl}_3$ ):  $\delta$  163.5 (d,  $J$  = 9.2 Hz), 163.4, 142.3 (d,  $J$  = 25.9 Hz), 136.0, 135.0, 134.9, 134.5, 131.35, 131.32, 131.29, 131.18, 128.8 (d,  $J$  = 1.4 Hz), 128.4, 128.2, 62.5, 13.7;  $^{31}\text{P}$  NMR ( $\text{CDCl}_3$ ):  $\delta$  51.1; HRMS (ESI) Anal. calcd. for  $\text{C}_{20}\text{H}_{18}\text{O}_2\text{N}_2\text{NaPS}_2$   $m/z$  422.0409  $[\text{M}+\text{Na}]^+$ , found 422.0407.

**(5aR,10bS)-2-(3,5-Dimethylphenyl)-5a,10b-dihydro-4H,6H-indeno[2,1-b][1,2,4]triazolo[4,3-d][1,4]oxazin-2-ium tetrafluoroborate (L4)**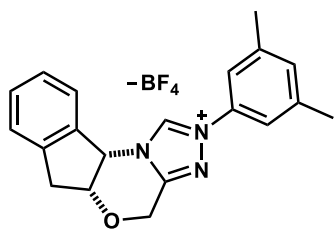

White solid; M. p. 249–252 °C; IR (KBr):  $\nu$  3421, 3130, 3102, 3055, 3016, 2923, 1621, 1584, 1540, 1483, 1461, 1447, 1427, 1104, 1084, 1006  $\text{cm}^{-1}$ ;  $^1\text{H}$  NMR (400 MHz,  $\text{CD}_3\text{CN}$ ):  $\delta$  10.28 (s, 1H), 7.62–7.60 (m, 1H), 7.52 (t,  $J = 0.6$  Hz, 2H), 7.42–7.32 (m, 4H), 5.93 (d,  $J = 4.2$  Hz, 1H), 5.17 (d,  $J = 16.4$  Hz, 1H), 5.03 (dd,  $J = 0.2, 16.4$  Hz, 1H), 4.95–4.93 (m, 1H), 3.45 (dd,  $J = 5.0, 17.2$  Hz, 1H), 3.23 (d,  $J = 17.2$  Hz, 1H), 2.45 (d,  $J = 0.6$  Hz, 6H);  $^{13}\text{C}$  NMR (100 MHz,  $\text{CD}_3\text{CN}$ ):  $\delta$  151.1, 141.68, 141.65, 140.3, 136.0, 133.5, 130.6, 128.2, 126.6, 125.5, 119.6, 78.2, 62.6, 60.9, 37.8, 21.2; HRMS (ESI) Anal. calcd. for  $\text{C}_{20}\text{H}_{20}\text{ON}_3$   $m/z$  318.1601  $[\text{M}-\text{BF}_4]^+$ , found 318.1602.  $[\alpha]_{\text{D}}^{25}$  246.0 ( $c$  0.59,  $\text{CH}_3\text{CN}$ ).

**(5aR,10bS)-2-([1,1':3',1''-Terphenyl]-5'-yl)-5a,10b-dihydro-4H,6H-indeno[2,1-b][1,2,4]triazolo[4,3-d][1,4]oxazin-2-ium tetrafluoroborate (L5)**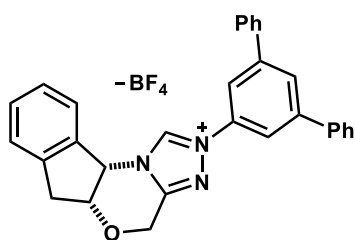

Pale yellow solid; IR (KBr):  $\nu$  3418, 3054, 2931, 1732, 1614, 1593, 1578, 1535, 1499, 1473, 1462, 1438, 1102, 1083, 1063  $\text{cm}^{-1}$ ;  $^1\text{H}$  NMR (400 MHz,  $\text{CD}_3\text{CN}$ ):  $\delta$  10.47 (s, 1H), 8.16 (t,  $J = 1.6$  Hz, 1H), 8.09 (d,  $J = 1.6$  Hz, 2H), 7.85–7.82 (m, 4H), 7.67 (d,  $J = 7.1$  Hz, 1H), 7.59–7.55 (m, 4H), 7.52–7.48 (m, 2H), 7.44–7.38 (m, 3H), 5.98 (d,  $J = 4.2$  Hz, 1H), 5.22 (d,  $J = 16.4$  Hz, 1H), 5.05 (d,  $J = 16.4$  Hz, 1H), 4.99–4.97 (m, 1H), 3.47 (dd,  $J = 5.0, 17.2$  Hz, 1H), 3.25 (d,  $J = 17.2$  Hz, 1H);  $^{13}\text{C}$  NMR (100 MHz,  $\text{CD}_3\text{CN}$ ):  $\delta$  151.1, 144.6, 141.6, 140.9, 139.5, 137.0, 135.9, 130.6, 130.0, 129.6, 128.2, 128.1, 126.6, 125.4, 119.3, 78.1, 62.7, 60.8, 37.7;

HRMS (ESI) Anal. calcd. for  $\text{C}_{30}\text{H}_{24}\text{ON}_3$   $m/z$  442.1914  $[\text{M}-\text{BF}_4]^+$ , found 442.1912.  $[\alpha]_{\text{D}}^{25}$  212.4 ( $c$  0.76,  $\text{CH}_3\text{CN}$ ).

**(5aR,10bS)-2-(Naphthalen-1-yl)-5a,10b-dihydro-4H,6H-indeno[2,1-b][1,2,4]triazolo[4,3-d][1,4]oxazin-2-ium tetrafluoroborate (L6)**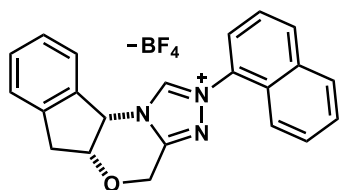

Purple solid; M. p. 224–227 °C; IR (KBr):  $\nu$  3421, 3112, 3077, 3032, 2940, 1600, 1577, 1527, 1514, 1486, 1461, 1427, 1120, 1101, 1084, 1019, 1005  $\text{cm}^{-1}$ ;  $^1\text{H}$  NMR (400 MHz,  $\text{CD}_3\text{CN}$ ):  $\delta$  10.24 (s, 1H), 8.29 (d,  $J = 8.3$  Hz, 1H), 8.16–8.13 (m, 1H), 7.90–7.85 (m, 2H), 7.77–7.69 (m, 3H), 7.57 (d,  $J = 7.4$  Hz, 1H), 7.45–7.36 (m, 3H), 6.03 (d,  $J = 4.2$  Hz, 1H), 5.24 (d,  $J = 16.4$  Hz, 1H), 5.09 (d,  $J = 16.4$  Hz, 1H), 5.03–5.01 (m, 1H), 3.51 (dd,  $J = 5.1, 17.2$  Hz, 1H), 3.28 (d,  $J = 17.2$  Hz, 1H);  $^{13}\text{C}$  NMR (100 MHz,  $\text{CD}_3\text{CN}$ ):  $\delta$  151.5, 143.9, 141.8, 136.1, 135.1, 133.5, 132.1,

130.6, 129.6, 129.5, 128.7, 128.4, 128.2, 126.7, 126.2, 126.1, 125.5, 122.6, 78.3, 62.7, 61.1, 37.9; HRMS (ESI) Anal. calcd. for  $\text{C}_{22}\text{H}_{18}\text{ON}_3$   $m/z$  340.1444  $[\text{M}-\text{BF}_4]^+$ , found 340.1446.  $[\alpha]_{\text{D}}^{25}$  138.5 ( $c$  0.76,  $\text{CH}_3\text{CN}$ ).

**(5aR,10bS)-2-(2,6-Diethylphenyl)-5a,10b-dihydro-4H,6H-indeno[2,1-b][1,2,4]triazolo[4,3-d][1,4]oxazin-2-ium tetrafluoroborate (L7)**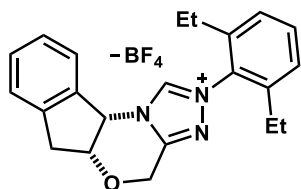

White solid; M. p. 204–206 °C; IR (KBr):  $\nu$  3421, 3124, 3088, 3049, 2973, 2938, 2905, 2880, 1579, 1531, 1485, 1463, 1432, 1105, 1086, 1058, 1001  $\text{cm}^{-1}$ ;  $^1\text{H}$  NMR (400 MHz,  $\text{CD}_3\text{CN}$ ):  $\delta$  10.11 (s, 1H), 7.63 (t,  $J = 7.7$  Hz, 1H), 7.45–7.36 (m, 6H), 6.02 (d,  $J = 4.2$  Hz, 1H), 5.17 (d,  $J = 16.2$  Hz, 1H), 5.05–5.01 (m, 2H), 3.50 (dd,  $J = 5.0, 17.3$  Hz, 1H), 3.25 (d,  $J = 17.3$  Hz, 1H), 2.42 (brs, 4H), 1.14 (s, 6H);  $^{13}\text{C}$  NMR (100 MHz,  $\text{CD}_3\text{CN}$ ):  $\delta$  151.8, 143.9, 142.5, 141.8, 136.5, 133.4, 130.6,

128.44, 128.40, 126.8, 124.5, 78.1, 62.8, 61.1, 38.0, 24.6, 15.4; HRMS (ESI) Anal. calcd. for  $\text{C}_{22}\text{H}_{24}\text{ON}_3$   $m/z$  346.1914  $[\text{M}-\text{BF}_4]^+$ , found 346.1911.  $[\alpha]_{\text{D}}^{24}$  89.9 ( $c$  0.55,  $\text{CH}_3\text{CN}$ ).

## 4. General Procedure and Characterization of the Products

## 4.1. Ligand screening.

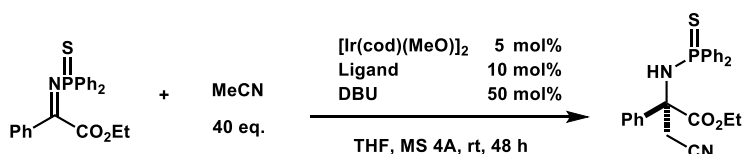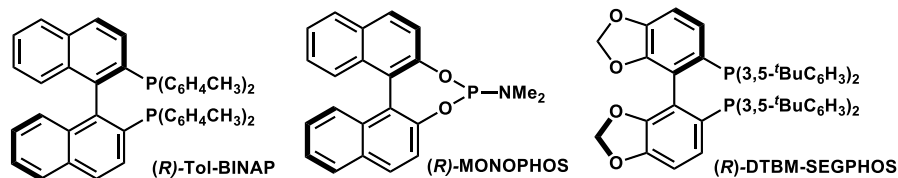

No reaction

No reaction

No reaction

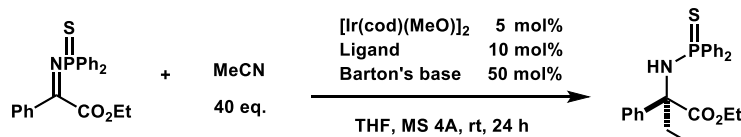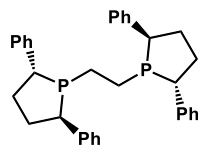

14% yield, 19% ee

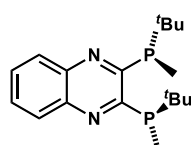

trace

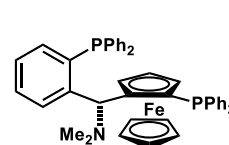

trace

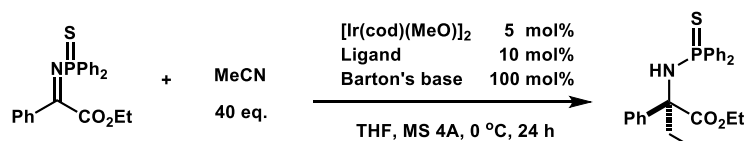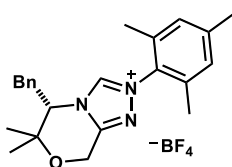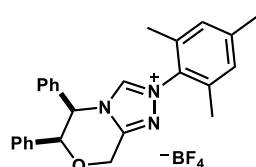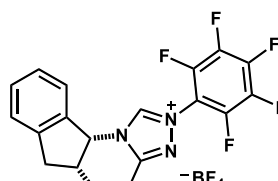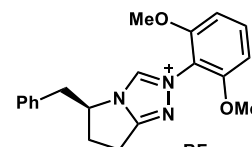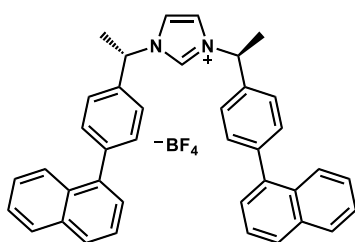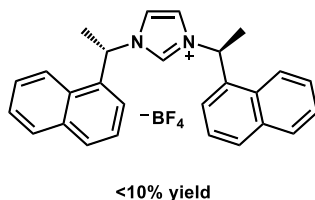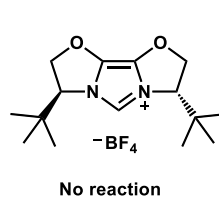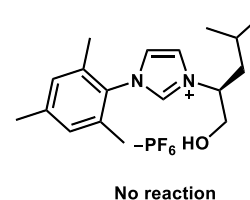4.2. Catalytic asymmetric Mannich-type reaction of  $\alpha,\beta$ -unsaturated  $\gamma$ -butyrolactam to ketimines.

A flame-dried 20 mL test tube equipped with a magnetic stirring bar and 3-way glass stopcock was charged with [Ir(cod)(OMe)<sub>2</sub>] (3.3 mg, 0.005 mmol), NHC precursor (5.0 mg, 0.01 mmol) and MS 4A (100 mg) under Ar atmosphere and THF (0.5 mL) was added at room temperature, then Barton's base (20.0  $\mu$ L, 0.1 mmol) was added. The mixture was stirred at room temperature for 0.5 h and then cooled to -5 °C. Ketimine (0.1 mmol) in THF (0.5 mL) was added via a gas-tight syringe with a stainless steel needle under an Ar atmosphere. Then MeCN (210  $\mu$ L, 4 mmol) was added via a

Enantioselective synthesis of  $\alpha,\alpha$ -disubstituted  $\alpha$ -amino acids via direct catalytic asymmetric addition of acetonitrile to  $\alpha$ -iminoesters gas-tight syringe with a stainless steel needle under an Ar atmosphere. The resulting reaction mixture was stirred at  $-5\text{ }^{\circ}\text{C}$  for 5 d. Reaction was quenched with AcOH (0.2 ml, 1.0 M in THF). Diluted the mixture with EtOAc and passed through a shot pad of silica gel column (eluted with EtOAc). After evaporation, the residue was purified by preparative TLC (*n*-hexane/ethyl acetate = 4/1) to give the pure product.

### Ethyl (R)-3-cyano-2-((diphenylphosphorothioyl)amino)-2-phenylpropanoate (8a)

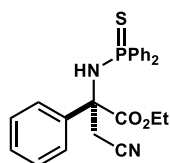

White powder; IR (KBr):  $\nu$  2251, 1733  $\text{cm}^{-1}$ ;  $^1\text{H}$  NMR (400 MHz,  $\text{CDCl}_3$ ):  $\delta$  7.94–7.81 (m, 4H), 7.51–7.40 (m, 6H), 7.37–7.34 (m, 2H), 7.26–7.23 (m, 3H), 4.35–4.28 (m, 1H), 4.23–4.11 (m, 3H), 3.66 (d,  $J = 16.6$  Hz, 1H), 1.18 (t,  $J = 7.1$  Hz, 3H);  $^{13}\text{C}$  NMR (100 MHz,  $\text{CDCl}_3$ ):  $\delta$  171.7 (d,  $J = 5.8$  Hz), 137.6 (d,  $J = 7.1$  Hz), 136.3, 135.2, 134.5, 133.5, 132.2, 132.0, 131.8 (d,  $J = 2.7$  Hz), 130.8, 130.7, 128.9, 128.7, 128.65, 128.61, 128.4, 128.2, 125.9, 117.0, 65.0, 63.0, 28.1, 13.7;  $^{31}\text{P}$  NMR ( $\text{CDCl}_3$ ):  $\delta$  54.7; HRMS (ESI) Anal. calcd. for  $\text{C}_{24}\text{H}_{23}\text{O}_2\text{N}_2\text{NaPS}$   $m/z$  457.1110  $[\text{M}+\text{Na}]^+$ , found 457.1105;  $[\alpha]_{\text{D}}^{25} -6.3$  ( $c$  0.66,  $\text{CHCl}_3$ , 68% ee sample); Enantiomeric excess of the product was determined to be 68% ee by chiral stationary phase HPLC analysis (CHIRALPAK IC ( $\phi$  0.46 cm  $\times$  25 cm), 2-propanol/*n*-hexane = 1/5, flow rate 1.0 mL/min, detection at 254 nm,  $t_{\text{r}} = 18.0$  min (major), 23.7 min (minor)).

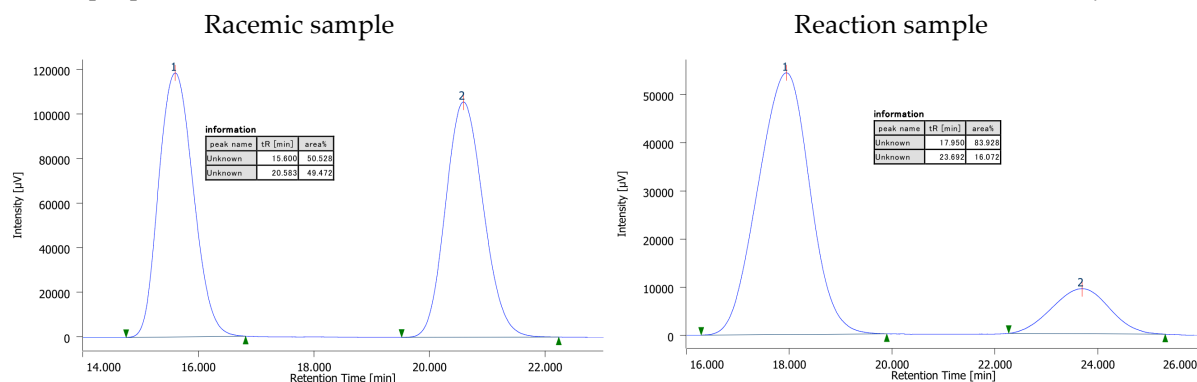

### Ethyl (R)-3-cyano-2-((diphenylphosphorothioyl)amino)-2-(*o*-tolyl)propanoate (8f)

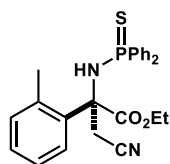

White powder; IR (KBr):  $\nu$  2246, 1725  $\text{cm}^{-1}$ ;  $^1\text{H}$  NMR (400 MHz,  $\text{CDCl}_3$ ):  $\delta$  7.90–7.84 (m, 2H), 7.55–7.45 (m, 5H), 7.41 (d,  $J = 7.8$  Hz, 1H), 7.32–7.28 (m, 1H), 7.17–7.11 (m, 3H), 6.99 (dt,  $J = 0.9, 7.4$  Hz, 1H), 6.54 (d,  $J = 7.4$  Hz, 1H), 4.92 (d,  $J = 15.9$  Hz, 1H), 4.74 (d,  $J = 8.3$  Hz, 1H), 4.29–4.37 (m, 1H), 4.23–4.16 (m, 1H), 3.55 (d,  $J = 15.8$  Hz, 1H), 1.86 (s, 3H), 1.25 (t,  $J = 7.1$  Hz, 3H);  $^{13}\text{C}$  NMR (100 MHz,  $\text{CDCl}_3$ ):  $\delta$  172.6 (d,  $J = 11.7$  Hz), 136.9, 136.1, 135.1, 133.0, 132.8 (d,  $J = 1.7$  Hz), 131.95, 131.93, 131.90, 131.8, 131.72, 131.68, 131.0 (d,  $J = 3.0$  Hz), 130.5, 130.4, 129.0, 128.8, 127.6, 127.5, 127.4, 125.5, 116.8, 64.3 (d,  $J = 1.3$  Hz), 63.6, 29.1, 20.4, 13.9;  $^{31}\text{P}$  NMR ( $\text{CDCl}_3$ ):  $\delta$  51.5; HRMS (ESI) Anal. calcd. for  $\text{C}_{25}\text{H}_{25}\text{O}_2\text{N}_2\text{NaPS}$   $m/z$  471.1267  $[\text{M}+\text{Na}]^+$ , found 471.1260;  $[\alpha]_{\text{D}}^{24} 1.9$  ( $c$  0.75,  $\text{CHCl}_3$ , 21% ee sample); Enantiomeric excess of the product was determined to be 21% ee by chiral stationary phase HPLC analysis (CHIRALPAK IA ( $\phi$  0.46 cm  $\times$  25 cm), 2-propanol/*n*-hexane = 1/9, flow rate 1.0 mL/min, detection at 254 nm,  $t_{\text{r}} = 10.0$  min (minor), 11.3 min (major)).

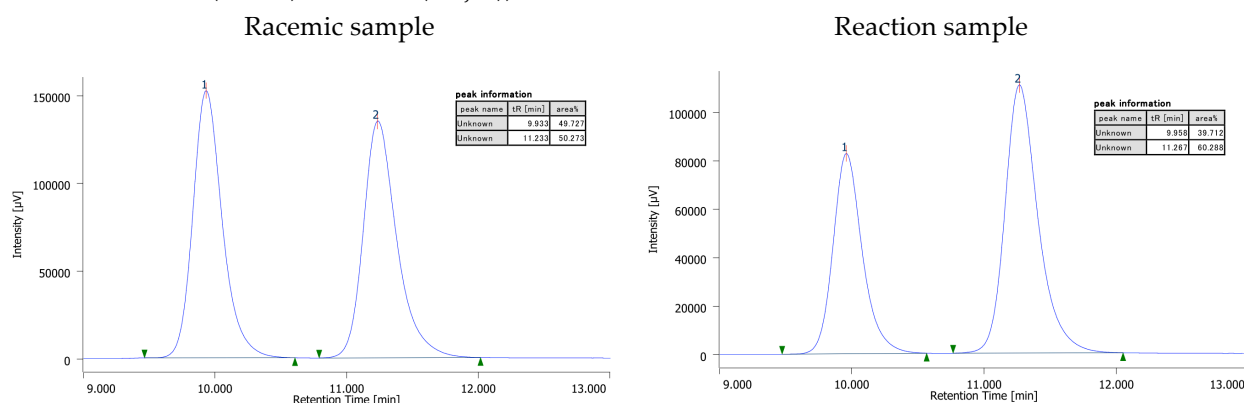

Enantioselective synthesis of  $\alpha,\alpha$ -disubstituted  $\alpha$ -amino acids via direct catalytic asymmetric addition of acetonitrile to  $\alpha$ -iminoesters**Ethyl (R)-3-cyano-2-((diphenylphosphorothioyl)amino)-2-(*m*-tolyl)propanoate (8g)**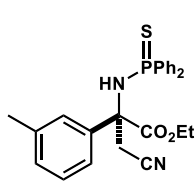

White powder; IR (KBr):  $\nu$  2251, 1733  $\text{cm}^{-1}$ ;  $^1\text{H}$  NMR (400 MHz,  $\text{CDCl}_3$ ):  $\delta$  7.92–7.80 (m, 4H), 7.52–7.39 (m, 6H), 7.19–7.12 (m, 2H), 7.06–7.02 (m, 2H), 4.35–4.27 (m, 1H), 4.23–4.15 (m, 3H), 3.64 (d,  $J$  = 10.8 Hz, 1H), 2.21 (s, 3H), 1.18 (t,  $J$  = 7.2 Hz, 3H);  $^{13}\text{C}$  NMR (100 MHz,  $\text{CDCl}_3$ ):  $\delta$  171.7 (d,  $J$  = 5.8 Hz), 138.4, 137.3 (d,  $J$  = 6.7 Hz), 136.4, 135.4, 134.5, 133.5, 132.2, 132.0, 131.81, 131.78, 131.75, 130.7, 130.6, 129.6, 128.7, 128.6, 128.5, 128.2, 128.1, 126.7, 117.1, 65.0, 63.0, 28.1, 21.5, 13.7;  $^{31}\text{P}$  NMR ( $\text{CDCl}_3$ ):  $\delta$  54.4; HRMS (ESI) Anal. calcd. for  $\text{C}_{25}\text{H}_{25}\text{O}_2\text{N}_2\text{NaPS}$   $m/z$  471.1267 [ $\text{M}+\text{Na}$ ] $^+$ , found 471.1257;  $[\alpha]_{\text{D}}^{25}$   $-7.3$  ( $c$  0.82,  $\text{CHCl}_3$ , 68% ee sample); Enantiomeric excess of the product was determined to be 68% ee by chiral stationary phase HPLC analysis (CHIRALPAK IC ( $\phi$  0.46 cm  $\times$  25 cm), 2-propanol/*n*-hexane = 1/5, flow rate 1.0 mL/min, detection at 254 nm,  $t_{\text{r}}$  = 15.0 min (major), 20.1 min (minor)).

Racemic sample

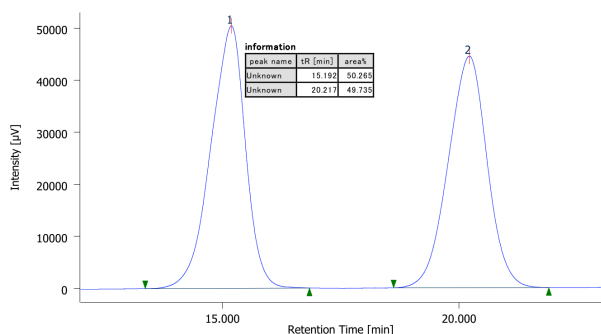

Reaction sample

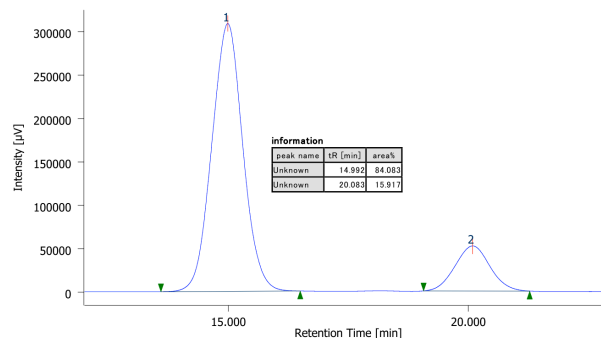**Ethyl (R)-3-cyano-2-((diphenylphosphorothioyl)amino)-2-(*p*-tolyl)propanoate (8h)**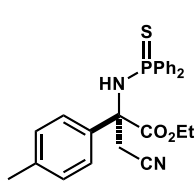

White powder; IR (KBr):  $\nu$  2251, 1732  $\text{cm}^{-1}$ ;  $^1\text{H}$  NMR (400 MHz,  $\text{CDCl}_3$ ):  $\delta$  7.93–7.81 (m, 4H), 7.52–7.38 (m, 6H), 7.24–7.22 (m, 2H), 7.03 (d,  $J$  = 8.0 Hz, 2H), 4.34–4.26 (m, 1H), 4.22–4.08 (m, 3H), 3.64 (d,  $J$  = 16.6 Hz, 1H), 2.27 (s, 3H), 1.17 (t,  $J$  = 7.2 Hz, 3H);  $^{13}\text{C}$  NMR (100 MHz,  $\text{CDCl}_3$ ):  $\delta$  171.8 (d,  $J$  = 5.8 Hz), 138.9, 136.3, 135.3, 134.74, 134.66, 134.5, 133.5, 132.2, 132.1, 131.8 (d,  $J$  = 3.0 Hz), 131.7 (d,  $J$  = 3.0 Hz), 130.8, 130.7, 129.3, 128.7, 128.6, 128.3, 128.1, 125.8, 117.1, 64.8, 62.9, 28.2, 21.0, 13.7;  $^{31}\text{P}$  NMR ( $\text{CDCl}_3$ ):  $\delta$  54.6; HRMS (ESI) Anal. calcd. for  $\text{C}_{25}\text{H}_{25}\text{O}_2\text{N}_2\text{NaPS}$   $m/z$  471.1267 [ $\text{M}+\text{Na}$ ] $^+$ , found 471.1261;  $[\alpha]_{\text{D}}^{25}$   $-2.5$  ( $c$  0.69,  $\text{CHCl}_3$ , 71% ee sample); Enantiomeric excess of the product was determined to be 71% ee by chiral stationary phase HPLC analysis (CHIRALPAK IC ( $\phi$  0.46 cm  $\times$  25 cm), 2-propanol/*n*-hexane = 1/5, flow rate 1.0 mL/min, detection at 254 nm,  $t_{\text{r}}$  = 18.2 min (major), 23.4 min (minor)).

Racemic sample

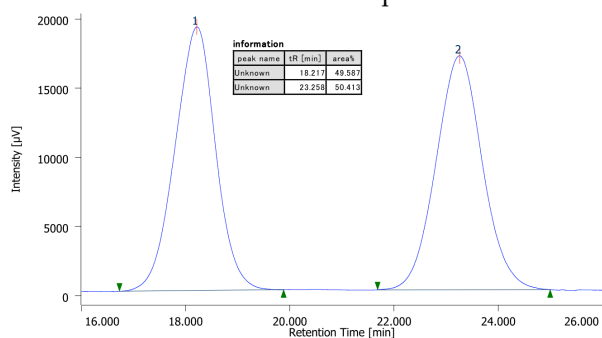

Reaction sample

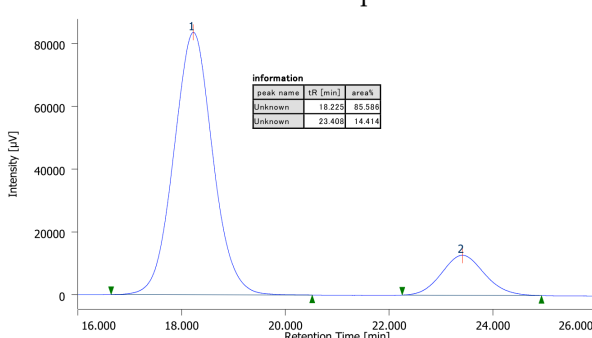**Ethyl (R)-2-([1,1'-biphenyl]-4-yl)-3-cyano-2-((diphenylphosphorothioyl)amino)propanoate (8i)**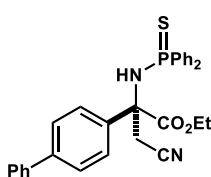

White powder; IR (KBr):  $\nu$  2251, 1733  $\text{cm}^{-1}$ ;  $^1\text{H}$  NMR (400 MHz,  $\text{CDCl}_3$ ):  $\delta$  7.91–7.82 (m, 4H), 7.53–7.33 (m, 15H), 4.38–4.18 (m, 4H), 3.68 (d,  $J$  = 16.5 Hz, 1H), 1.20 (t,  $J$  = 7.2 Hz, 3H);  $^{13}\text{C}$  NMR (100 MHz,  $\text{CDCl}_3$ ):  $\delta$  171.7 (d,  $J$  = 6.6 Hz), 141.7, 139.9, 136.3, 136.2, 136.1, 135.2, 134.4, 133.4, 132.2, 132.1, 131.8 (d,  $J$  = 3.0 Hz), 131.7 (d,  $J$  = 3.0 Hz), 130.7, 130.6, 128.79, 128.76, 128.6, 128.2, 128.1, 127.7, 127.1, 127.0, 126.5, 117.0, 64.9, 63.2, 28.0, 13.7;  $^{31}\text{P}$  NMR ( $\text{CDCl}_3$ ):  $\delta$  54.4; HRMS (ESI) Anal. calcd. for  $\text{C}_{30}\text{H}_{27}\text{O}_2\text{N}_2\text{NaPS}$   $m/z$  533.1423 [ $\text{M}+\text{Na}$ ] $^+$ , found 533.1415;  $[\alpha]_{\text{D}}^{25}$  7.2 ( $c$  0.93,  $\text{CHCl}_3$ , 72% ee sample); Enantiomeric excess

Enantioselective synthesis of  $\alpha,\alpha$ -disubstituted  $\alpha$ -amino acids via direct catalytic asymmetric addition of acetonitrile to  $\alpha$ -iminoesters of the product was determined to be 72% ee by chiral stationary phase HPLC analysis (CHIRALPAK IA ( $\phi$  0.46 cm x 25 cm), 2-propanol/*n*-hexane = 1/9, flow rate 1.0 mL/min, detection at 254 nm,  $t_R$  = 13.8 min (major), 16.5 min (minor)).

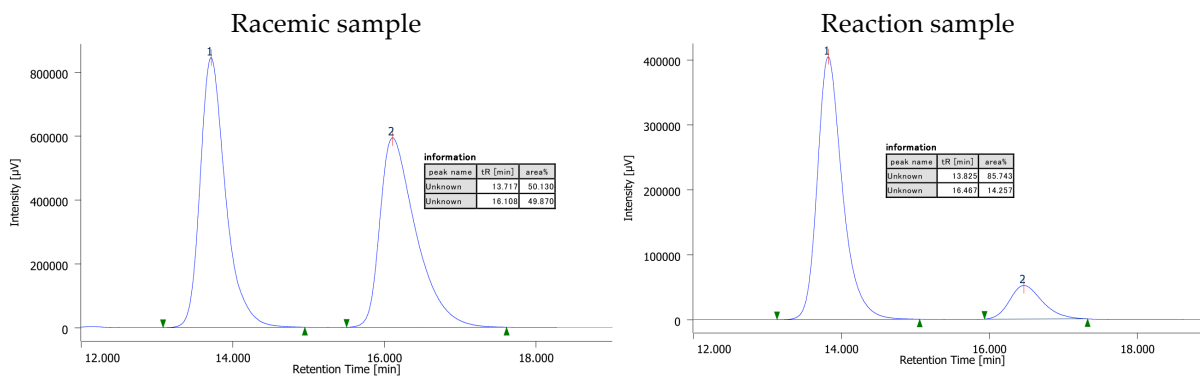

### Ethyl (*R*)-2-(4-(*tert*-butyl)phenyl)-3-cyano-2-((diphenylphosphorothioyl)amino)propanoate (**8j**)

White powder; IR (KBr):  $\nu$  2251, 1733  $\text{cm}^{-1}$ ;  $^1\text{H}$  NMR (400 MHz,  $\text{CDCl}_3$ ):  $\delta$  7.91–7.79 (m, 4H), 7.50–7.37 (m, 6H), 7.28–7.21 (m, 4H), 4.36–4.28 (m, 1H), 4.24–4.14 (m, 3H), 3.65 (d,  $J$  = 16.6 Hz, 1H), 1.25 (s, 9H), 1.20 (t,  $J$  = 7.2 Hz, 3H);  $^{13}\text{C}$  NMR (100 MHz,  $\text{CDCl}_3$ ):  $\delta$  171.8 (d,  $J$  = 5.9 Hz), 151.9, 136.4, 135.4, 134.4 (d,  $J$  = 3.3 Hz), 134.3, 133.4, 132.2, 132.1, 131.8, 131.78, 131.76, 131.73, 130.7, 130.6, 128.7, 128.6, 128.3, 128.1, 125.7, 125.5, 117.2, 64.8, 63.0, 34.5, 31.1, 28.1, 13.7;  $^{31}\text{P}$  NMR ( $\text{CDCl}_3$ ):  $\delta$  54.4; HRMS (ESI) Anal. calcd. for  $\text{C}_{28}\text{H}_{31}\text{O}_2\text{N}_2\text{NaPS}$   $m/z$  513.1736 [ $\text{M}+\text{Na}$ ] $^+$ , found 513.1729;  $[\alpha]_{\text{D}}^{25}$  1.2 ( $c$  0.53,  $\text{CHCl}_3$ , 66% ee sample); Enantiomeric excess of the product was determined to be 66% ee by chiral stationary phase HPLC analysis (CHIRALPAK IC ( $\phi$  0.46 cm x 25 cm), 2-propanol/*n*-hexane = 1/5, flow rate 1.0 mL/min, detection at 254 nm,  $t_R$  = 14.7 min (major), 17.7 min (minor)).

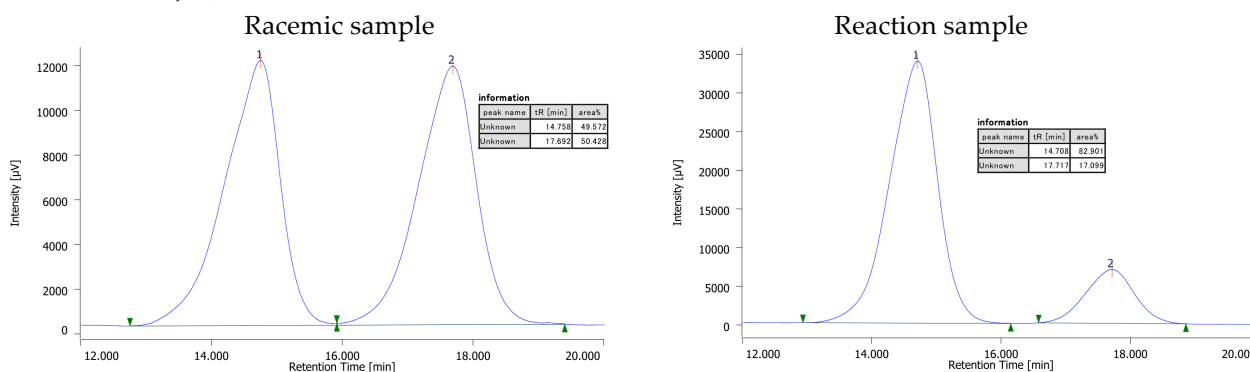

### Ethyl (*R*)-3-cyano-2-(3,5-dimethylphenyl)-2-((diphenylphosphorothioyl)amino)propanoate (**8k**)

White powder; IR (KBr):  $\nu$  2251, 1733  $\text{cm}^{-1}$ ;  $^1\text{H}$  NMR (400 MHz,  $\text{CDCl}_3$ ):  $\delta$  7.90–7.79 (m, 4H), 7.48–7.40 (m, 6H), 6.89 (s, 2H), 6.82 (s, 1H), 4.36–4.28 (m, 1H), 4.23–4.14 (m, 3H), 3.61 (d,  $J$  = 16.5 Hz, 1H), 2.19 (s, 6H), 1.19 (t,  $J$  = 7.1 Hz, 3H);  $^{13}\text{C}$  NMR (100 MHz,  $\text{CDCl}_3$ ):  $\delta$  171.8 (d,  $J$  = 6.5 Hz), 138.2, 137.1 (d,  $J$  = 6.3 Hz), 136.5, 135.5, 134.5, 133.5, 132.2, 132.0, 131.77, 131.74, 131.7, 130.7, 130.6, 130.5, 128.7, 128.6, 128.1, 128.0, 123.8, 117.2, 64.9, 63.0, 28.1, 21.4, 13.7;  $^{31}\text{P}$  NMR ( $\text{CDCl}_3$ ):  $\delta$  54.2; HRMS (ESI) Anal. calcd. for  $\text{C}_{26}\text{H}_{27}\text{O}_2\text{N}_2\text{NaPS}$   $m/z$  485.1423 [ $\text{M}+\text{Na}$ ] $^+$ , found 485.1410;  $[\alpha]_{\text{D}}^{25}$  -4.9 ( $c$  0.57,  $\text{CHCl}_3$ , 71% ee sample); Enantiomeric excess of the product was determined to be 71% ee by chiral stationary phase HPLC analysis (CHIRALPAK IC ( $\phi$  0.46 cm x 25 cm), 2-propanol/*n*-hexane = 1/5, flow rate 1.0 mL/min, detection at 254 nm,  $t_R$  = 14.0 min (major), 18.5 min (minor)).



Enantioselective synthesis of  $\alpha,\alpha$ -disubstituted  $\alpha$ -amino acids via direct catalytic asymmetric addition of acetonitrile to  $\alpha$ -iminoesters

## Racemic sample

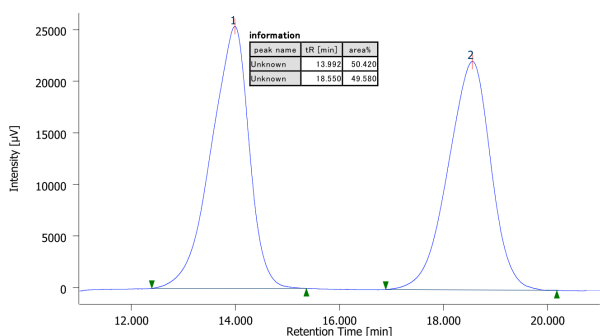

## Reaction sample

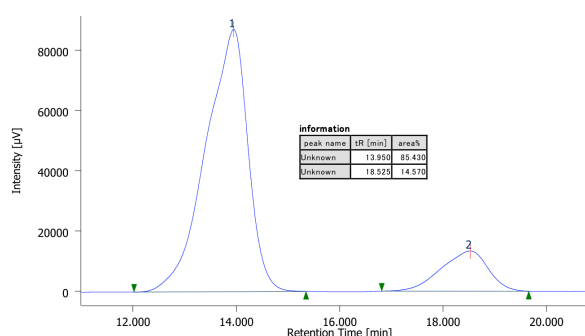Ethyl (*R*)-3-cyano-2-(3,5-di-*tert*-butylphenyl)-2-((diphenylphosphorothioyl)amino)propanoate (**8l**)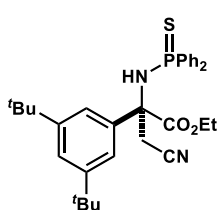

White powder; IR (KBr):  $\nu$  2254, 1734, 1713  $\text{cm}^{-1}$ ;  $^1\text{H}$  NMR (400 MHz,  $\text{CDCl}_3$ ):  $\delta$  7.86–7.80 (m, 4H), 7.50–7.40 (m, 4H), 7.37–7.33 (m, 2H), 7.28–7.27 (m, 3H), 4.34–4.13 (m, 4H), 3.71 (d,  $J = 16.6$  Hz, 1H), 1.26 (s, 18H), 1.15 (t,  $J = 7.2$  Hz, 3H);  $^{13}\text{C}$  NMR (100 MHz,  $\text{CDCl}_3$ ):  $\delta$  171.8 (d,  $J = 6.1$  Hz), 151.1, 136.9 (d,  $J = 6.3$  Hz), 136.7, 135.6, 134.9, 133.9, 132.0, 131.9, 131.74, 131.71, 131.69, 131.66, 130.8, 130.7, 128.7, 128.5, 128.3, 128.2, 123.0, 120.6, 117.5, 65.7, 62.8, 35.0, 31.3, 28.1, 13.8;  $^{31}\text{P}$  NMR ( $\text{CDCl}_3$ ):  $\delta$  54.2; HRMS (ESI) Anal. calcd. for  $\text{C}_{32}\text{H}_{40}\text{O}_2\text{N}_2\text{PS}$   $m/z$  547.2543  $[\text{M}+\text{H}]^+$ , found 547.2537;  $[\alpha]_{\text{D}}^{24} -3.1$

( $c$  1.57,  $\text{CHCl}_3$ , 39% ee sample); Enantiomeric excess of the product was determined to be 39% ee by chiral stationary phase HPLC analysis (CHIRALPAK ID ( $\phi$  0.46 cm  $\times$  25 cm), 2-propanol/*n*-hexane = 1/9, flow rate 1.0 mL/min, detection at 254 nm,  $t_{\text{R}} = 10.5$  min (major), 12.9 min (minor)).

## Racemic sample

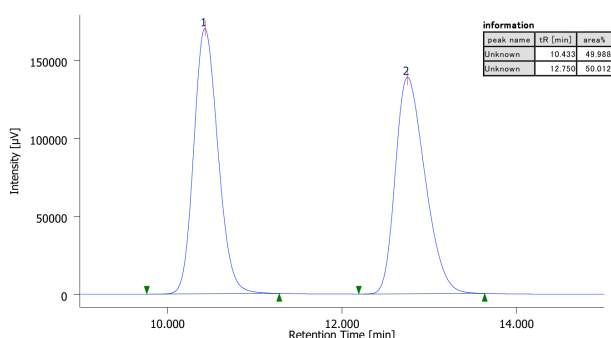

## Reaction sample

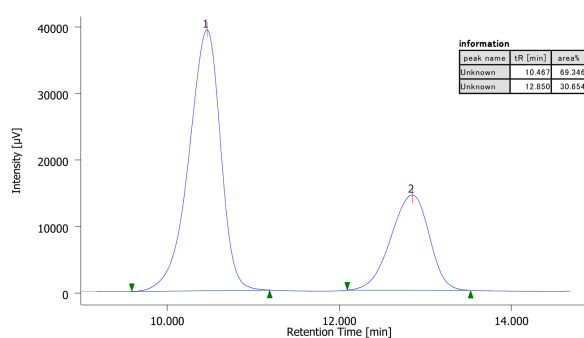Ethyl (*R*)-3-cyano-2-((diphenylphosphorothioyl)amino)-2-(naphthalen-2-yl)propanoate (**8m**)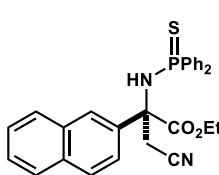

White powder; IR (KBr):  $\nu$  2251, 1733  $\text{cm}^{-1}$ ;  $^1\text{H}$  NMR (400 MHz,  $\text{CDCl}_3$ ):  $\delta$  7.89–7.78 (m, 5H), 7.75–7.72 (m, 2H), 7.62 (d,  $J = 8.8$  Hz, 1H), 7.51–7.45 (m, 5H), 7.37–7.31 (m, 2H), 7.29–7.24 (m, 2H), 4.42–4.29 (m, 3H), 4.23–4.15 (m, 1H), 3.76 (d,  $J = 16.4$  Hz, 1H), 1.17 (t,  $J = 7.1$  Hz, 3H);  $^{13}\text{C}$  NMR (100 MHz,  $\text{CDCl}_3$ ):  $\delta$  171.7 (d,  $J = 6.9$  Hz), 136.3, 135.3, 134.4 (d,  $J = 6.2$  Hz), 134.3, 133.3, 133.0, 132.5, 132.0, 131.9, 131.8 (d,  $J = 3.0$  Hz), 131.6 (d,  $J = 3.0$  Hz), 130.8, 130.7, 128.8, 128.6, 128.5, 128.4, 128.1, 128.0, 127.4, 126.9, 126.5, 125.8, 123.2, 117.0, 65.1, 63.2, 28.1, 13.7;  $^{31}\text{P}$  NMR ( $\text{CDCl}_3$ ):  $\delta$  54.3; HRMS (ESI) Anal. calcd. for  $\text{C}_{28}\text{H}_{25}\text{O}_2\text{N}_2\text{NaPS}$   $m/z$  507.1267  $[\text{M}+\text{Na}]^+$ , found 507.1257;  $[\alpha]_{\text{D}}^{25} 3.7$  ( $c$  0.77,  $\text{CHCl}_3$ , 80% ee sample); Enantiomeric excess of the product was determined to be 80% ee by chiral stationary phase HPLC analysis (CHIRALPAK IC ( $\phi$  0.46 cm  $\times$  25 cm), 2-propanol/*n*-hexane = 1/5, flow rate 1.0 mL/min, detection at 254 nm,  $t_{\text{R}} = 20.0$  min (major), 22.5 min (minor)).

## Racemic sample

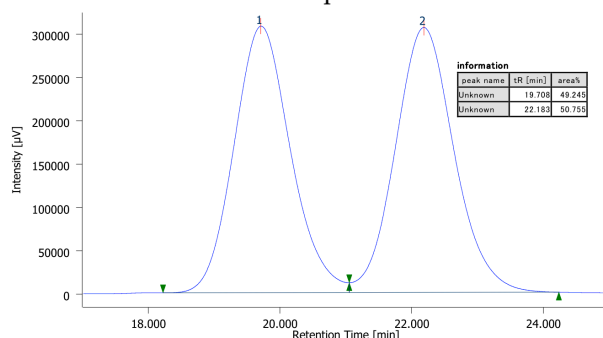

## Reaction sample

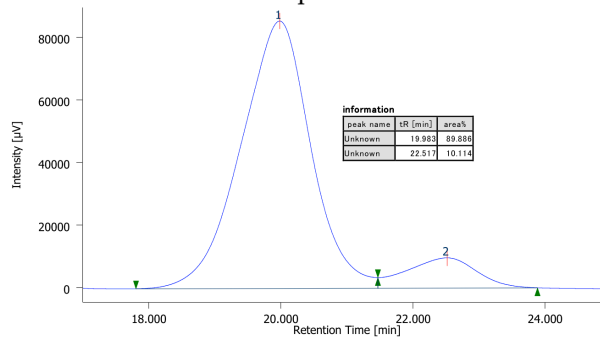

Enantioselective synthesis of  $\alpha,\alpha$ -disubstituted  $\alpha$ -amino acids via direct catalytic asymmetric addition of acetonitrile to  $\alpha$ -iminoesters**Ethyl (R)-3-cyano-2-((diphenylphosphorothioyl)amino)-2-(4-(trifluoromethyl)phenyl)propanoate (8n)**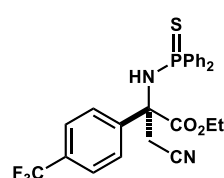

White powder; IR (KBr):  $\nu$  2251, 1736  $\text{cm}^{-1}$ ;  $^1\text{H}$  NMR (400 MHz,  $\text{CDCl}_3$ ):  $\delta$  7.84–7.75 (m, 4H), 7.54–7.43 (m, 4H), 7.41–7.34 (m, 6H), 4.44–4.30 (m, 3H), 4.25–4.19 (m, 1H), 3.63 (d,  $J = 16.4$  Hz, 1H), 1.20 (t,  $J = 7.1$  Hz, 3H);  $^{13}\text{C}$  NMR (100 MHz,  $\text{CDCl}_3$ ):  $\delta$  171.2 (d,  $J = 7.7$  Hz), 140.6, 140.5, 136.0, 135.0, 133.9, 132.9, 132.11, 132.05 (d,  $J = 3.0$  Hz), 132.00, 131.9 (d,  $J = 3.0$  Hz), 131.4, 131.1, 130.74, 130.70, 130.6, 130.4, 128.9, 128.7, 128.3, 128.2, 127.6, 126.9, 125.40, 125.36, 125.32, 125.28, 124.9, 122.2, 119.5, 116.7, 64.8, 63.6, 27.7, 13.7;  $^{19}\text{F}$  NMR (375 MHz,  $\text{CDCl}_3$ ):  $\delta$  -63.0;  $^{31}\text{P}$  NMR ( $\text{CDCl}_3$ ):  $\delta$  54.2; HRMS (ESI) Anal. calcd. for  $\text{C}_{25}\text{H}_{22}\text{O}_2\text{N}_2\text{F}_3\text{NaPS}$   $m/z$  525.0984  $[\text{M}+\text{Na}]^+$ , found 525.0977;  $[\alpha]_{\text{D}}^{25}$  -3.1 ( $c$  0.62,  $\text{CHCl}_3$ , 52% ee sample); Enantiomeric excess of the product was determined to be 52% ee by chiral stationary phase HPLC analysis (CHIRALPAK ID ( $\phi$  0.46 cm  $\times$  25 cm), 2-propanol/*n*-hexane = 1/9, flow rate 1.0 mL/min, detection at 254 nm,  $t_{\text{R}} = 28.5$  min (major), 30.8 min (minor)).

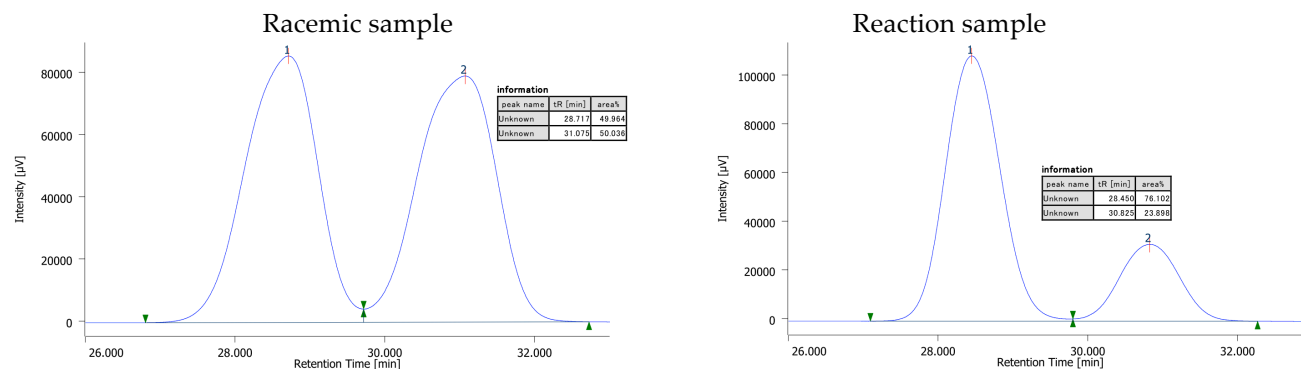**Ethyl (R)-3-cyano-2-((diphenylphosphorothioyl)amino)-2-(4-fluorophenyl)propanoate (8o)**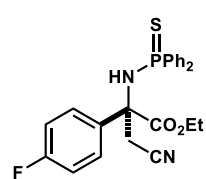

White powder; IR (KBr):  $\nu$  2251, 1734  $\text{cm}^{-1}$ ;  $^1\text{H}$  NMR (400 MHz,  $\text{CDCl}_3$ ):  $\delta$  7.89–7.79 (m, 4H), 7.51–7.40 (m, 6H), 7.30–7.26 (m, 2H), 6.90–6.84 (m, 2H), 4.36–4.16 (m, 4H), 3.62 (d,  $J = 16.5$  Hz, 1H), 1.19 (t,  $J = 7.2$  Hz, 3H);  $^{13}\text{C}$  NMR (100 MHz,  $\text{CDCl}_3$ ):  $\delta$  171.5 (d,  $J = 7.8$  Hz), 163.8, 161.3, 136.1, 135.1, 134.3, 133.3, 133.12, 133.09, 133.06, 133.03, 132.2, 132.0, 131.93 (d,  $J = 3.0$  Hz), 131.86 (d,  $J = 3.0$  Hz), 130.7, 130.6, 128.8, 128.7, 128.3, 128.21, 128.19, 128.13, 116.9, 115.5, 115.3, 64.6, 63.3, 28.1, 13.7;  $^{19}\text{F}$  NMR (375 MHz,  $\text{CDCl}_3$ ):  $\delta$  -112.4;  $^{31}\text{P}$  NMR ( $\text{CDCl}_3$ ):  $\delta$  54.4; HRMS (ESI) Anal. calcd. for  $\text{C}_{24}\text{H}_{22}\text{O}_2\text{N}_2\text{FNAPS}$   $m/z$  475.1016  $[\text{M}+\text{Na}]^+$ , found 475.1009;  $[\alpha]_{\text{D}}^{25}$  -5.5 ( $c$  0.66,  $\text{CHCl}_3$ , 71% ee sample); Enantiomeric excess of the product was determined to be 71% ee by chiral stationary phase HPLC analysis (CHIRALPAK IC ( $\phi$  0.46 cm  $\times$  25 cm), 2-propanol/*n*-hexane = 1/5, flow rate 1.0 mL/min, detection at 254 nm,  $t_{\text{R}} = 13.6$  min (major), 16.4 min (minor)).

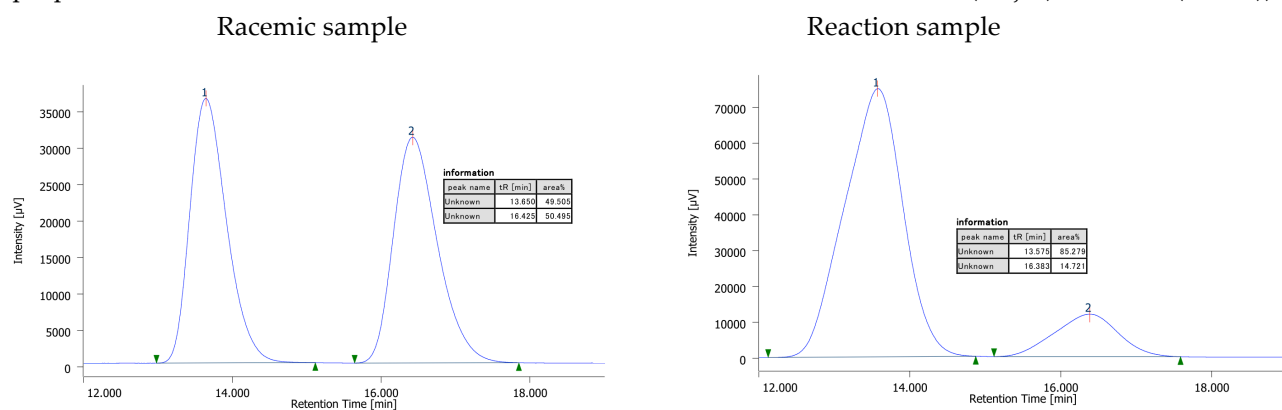**Ethyl (R)-2-(3-chloro-4-methylphenyl)-3-cyano-2-((diphenylphosphorothioyl)amino)propanoate (8p)**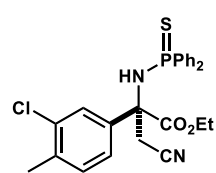

White powder; IR (KBr):  $\nu$  2252, 1734  $\text{cm}^{-1}$ ;  $^1\text{H}$  NMR (400 MHz,  $\text{CDCl}_3$ ):  $\delta$  7.87–7.79 (m, 4H), 7.51–7.39 (m, 6H), 7.20 (d,  $J = 2.1$  Hz, 1H), 7.11 (dd,  $J = 2.1, 8.0$  Hz, 1H), 7.05 (d,  $J = 8.1$  Hz, 1H), 4.37–4.16 (m, 4H), 3.60 (d,  $J = 16.5$  Hz, 1H), 2.26 (s, 3H), 1.20 (t,  $J = 7.1$  Hz, 3H);  $^{13}\text{C}$  NMR (100 MHz,  $\text{CDCl}_3$ ):  $\delta$  171.3 (d,  $J = 7.1$  Hz), 136.9, 136.42, 136.36, 135.1, 134.6, 134.1, 133.1, 132.1, 132.0, 131.9 (d,  $J = 3.0$  Hz), 131.8 (d,  $J = 3.0$  Hz), 130.8, 130.7, 130.6, 128.8, 128.7, 128.2, 128.1, 127.1, 124.3, 116.8, 64.5,

Enantioselective synthesis of  $\alpha,\alpha$ -disubstituted  $\alpha$ -amino acids via direct catalytic asymmetric addition of acetonitrile to  $\alpha$ -iminoesters 63.3, 27.9, 19.6, 13.7;  $^{31}\text{P}$  NMR ( $\text{CDCl}_3$ ):  $\delta$  54.3; HRMS (ESI) Anal. calcd. for  $\text{C}_{25}\text{H}_{24}\text{O}_2\text{N}_2\text{ClNaPS}$   $m/z$  505.0877  $[\text{M}+\text{Na}]^+$ , found 505.0876;  $[\alpha]_{\text{D}}^{25}$   $-3.1$  ( $c$  0.85,  $\text{CHCl}_3$ , 59% ee sample); Enantiomeric excess of the product was determined to be 59% ee by chiral stationary phase HPLC analysis (CHIRALPAK IA ( $\phi$  0.46 cm  $\times$  25 cm), 2-propanol/ $n$ -hexane = 1/20, flow rate 1.0 mL/min, detection at 254 nm,  $t_{\text{R}}$  = 13.8 min (major), 15.5 min (minor)).

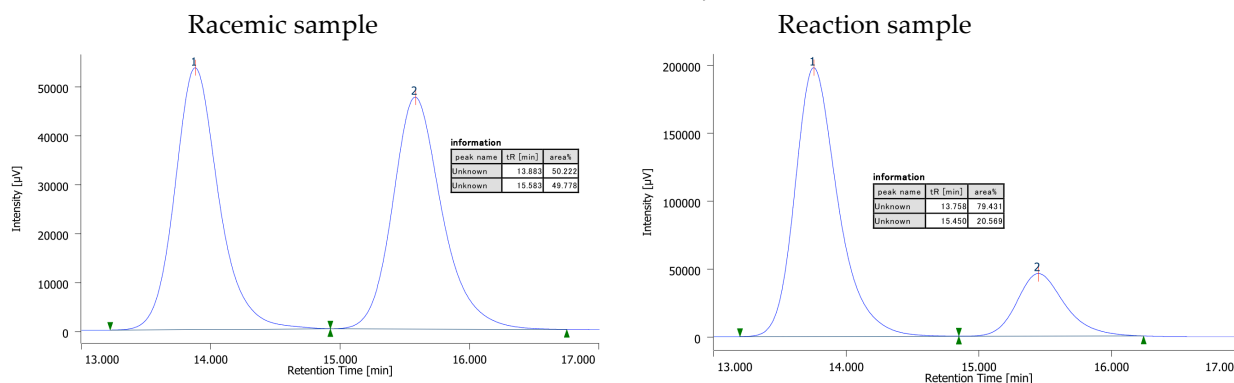

### Ethyl (R)-3-cyano-2-((diphenylphosphorothioyl)amino)-2-(4-(trimethylsilyl)phenyl)propanoate (8q)

White powder; IR (KBr):  $\nu$  2251, 1734  $\text{cm}^{-1}$ ;  $^1\text{H}$  NMR (400 MHz,  $\text{CDCl}_3$ ):  $\delta$  7.91–7.79 (m, 4H), 7.50–7.41 (m, 4H), 7.40–7.30 (m, 6H), 4.36–4.28 (m, 1H), 4.24–4.16 (m, 3H), 3.65 (d,  $J$  = 16.6 Hz, 1H), 1.19 (t,  $J$  = 7.2 Hz, 3H), 0.22 (s, 9H);  $^{13}\text{C}$  NMR (100 MHz,  $\text{CDCl}_3$ ):  $\delta$  171.6 (d,  $J$  = 6.1 Hz), 141.6, 137.7 (d,  $J$  = 6.8 Hz), 136.3, 135.3, 134.4, 133.6, 133.3, 132.2, 132.1, 131.8 (d,  $J$  = 3.0 Hz), 131.7 (d,  $J$  = 3.0 Hz), 130.7, 130.6, 128.7, 128.6, 128.3, 128.1, 125.2, 117.1, 65.0, 63.1, 28.0, 13.7, -1.3;  $^{31}\text{P}$  NMR ( $\text{CDCl}_3$ ):  $\delta$  54.5; HRMS (ESI) Anal. calcd. for  $\text{C}_{27}\text{H}_{31}\text{O}_2\text{N}_2\text{NaPSSi}$   $m/z$  529.1505  $[\text{M}+\text{Na}]^+$ , found 529.1488;  $[\alpha]_{\text{D}}^{25}$  1.9 ( $c$  1.21,  $\text{CHCl}_3$ , 62% ee sample); Enantiomeric excess of the product was determined to be 62% ee by chiral stationary phase HPLC analysis (CHIRALPAK IA ( $\phi$  0.46 cm  $\times$  25 cm), 2-propanol/ $n$ -hexane = 1/20, flow rate 1.0 mL/min, detection at 254 nm,  $t_{\text{R}}$  = 8.1 min (major), 9.2 min (minor)).

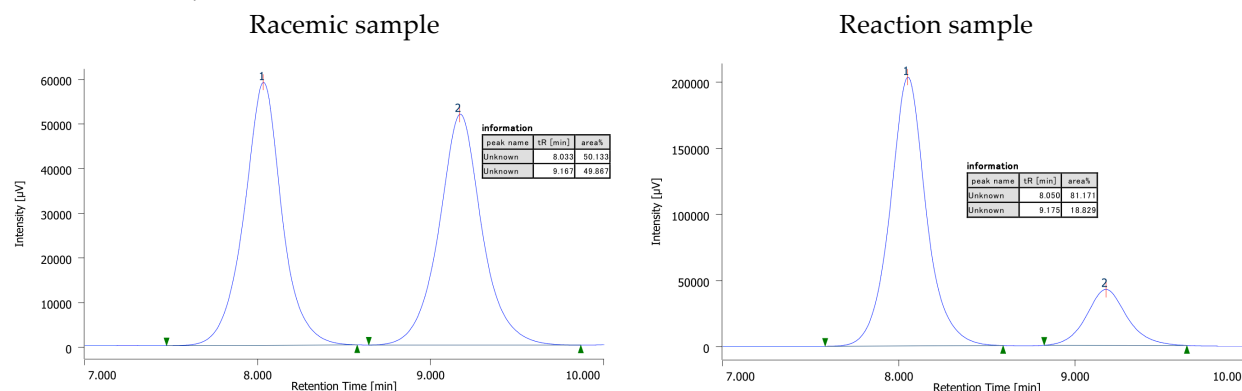

### Ethyl (R)-3-cyano-2-((diphenylphosphorothioyl)amino)-2-(4-methoxyphenyl)propanoate (8r)

White powder; IR (KBr):  $\nu$  2251, 1732  $\text{cm}^{-1}$ ;  $^1\text{H}$  NMR (400 MHz,  $\text{CDCl}_3$ ):  $\delta$  7.92–7.80 (m, 4H), 7.48–7.40 (m, 6H), 7.26–7.23 (m, 2H), 6.74–6.70 (m, 2H), 4.34–4.26 (m, 1H), 4.22–4.12 (m, 3H), 3.75 (s, 3H), 3.63 (d,  $J$  = 16.6 Hz, 1H), 1.18 (t,  $J$  = 7.2 Hz, 3H);  $^{13}\text{C}$  NMR (100 MHz,  $\text{CDCl}_3$ ):  $\delta$  171.8 (d,  $J$  = 6.1 Hz), 159.7, 136.3, 135.3, 134.6, 133.5, 132.2, 132.1, 131.8 (d,  $J$  = 3.0 Hz), 131.7 (d,  $J$  = 3.0 Hz), 130.8, 130.6, 129.5, 129.4, 128.7, 128.6, 128.3, 128.2, 127.4, 117.2, 113.9, 64.6, 63.0, 55.2, 28.2, 13.7;  $^{31}\text{P}$  NMR ( $\text{CDCl}_3$ ):  $\delta$  54.4; HRMS (ESI) Anal. calcd. for  $\text{C}_{25}\text{H}_{25}\text{O}_3\text{N}_2\text{NaPS}$   $m/z$  487.1216  $[\text{M}+\text{Na}]^+$ , found 487.1209;  $[\alpha]_{\text{D}}^{25}$   $-1.5$  ( $c$  0.65,  $\text{CHCl}_3$ , 71% ee sample); Enantiomeric excess of the product was determined to be 71% ee by chiral stationary phase HPLC analysis (CHIRALPAK IC ( $\phi$  0.46 cm  $\times$  25 cm), 2-propanol/ $n$ -hexane = 1/5, flow rate 1.0 mL/min, detection at 254 nm,  $t_{\text{R}}$  = 23.7 min (major), 29.3 min (minor)).

Enantioselective synthesis of  $\alpha,\alpha$ -disubstituted  $\alpha$ -amino acids via direct catalytic asymmetric addition of acetonitrile to  $\alpha$ -iminoesters

Racemic sample

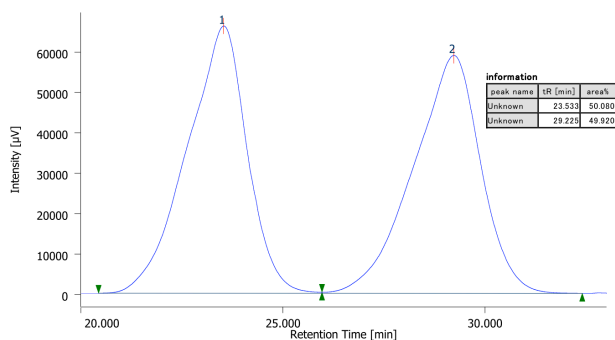

Reaction sample

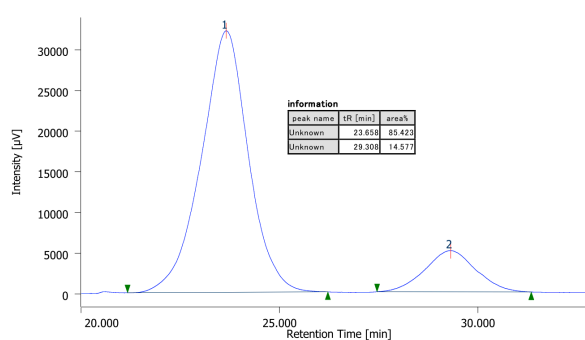Ethyl (*R*)-3-cyano-2-((diphenylphosphorothioyl)amino)-2-(4-(methylthio)phenyl)propanoate (**8s**)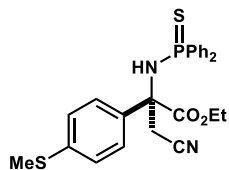

White powder; IR (KBr):  $\nu$  2251, 1732  $\text{cm}^{-1}$ ;  $^1\text{H}$  NMR (400 MHz,  $\text{CDCl}_3$ ):  $\delta$  7.89–7.80 (m, 4H), 7.51–7.39 (m, 6H), 7.22–7.19 (m, 2H), 7.05–7.02 (m, 2H), 4.34–4.26 (m, 1H), 4.22–4.14 (m, 3H), 3.63 (d,  $J = 16.5$  Hz, 1H), 2.42 (s, 3H), 1.18 (t,  $J = 7.2$  Hz, 3H);  $^{13}\text{C}$  NMR (100 MHz,  $\text{CDCl}_3$ ):  $\delta$  171.5 (d,  $J = 6.5$  Hz), 139.9, 136.1, 135.2, 134.4, 133.8, 133.7, 133.4, 132.1, 132.0, 131.8 (d,  $J = 3.0$  Hz), 131.7 (d,  $J = 3.0$  Hz), 130.7, 130.6, 128.7, 128.6, 128.3, 128.1, 126.5, 125.9, 117.0, 64.7, 63.1, 28.0, 15.2, 13.7;  $^{31}\text{P}$  NMR ( $\text{CDCl}_3$ ):  $\delta$  54.4; HRMS (ESI) Anal. calcd. for  $\text{C}_{25}\text{H}_{25}\text{O}_2\text{N}_2\text{NaPS}_2$   $m/z$  503.0987 [ $\text{M}+\text{Na}$ ] $^+$ , found 503.0983;  $[\alpha]_{\text{D}}^{25}$  4.9 ( $c$  1.05,  $\text{CHCl}_3$ , 71% ee sample); Enantiomeric excess of the product was determined to be 71% ee by chiral stationary phase HPLC analysis (CHIRALPAK IC ( $\phi$  0.46 cm  $\times$  25 cm), 2-propanol/*n*-hexane = 1/9, flow rate 1.0 mL/min, detection at 254 nm,  $t_{\text{R}} = 42.2$  min (major), 49.0 min (minor)).

Racemic sample

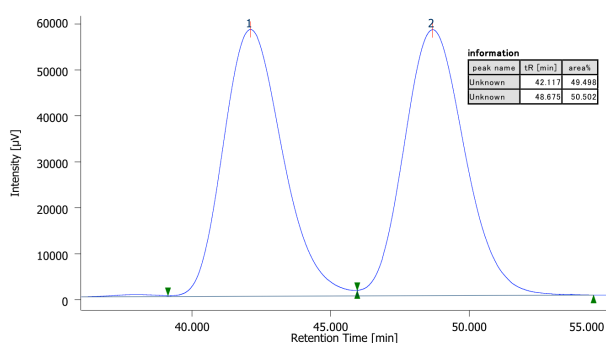

Reaction sample

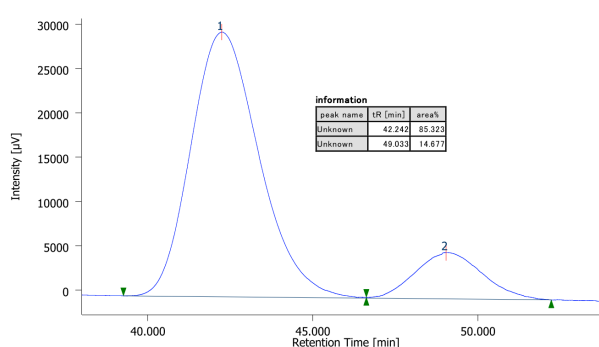Ethyl (*R*)-2-(benzo[*d*][1,3]dioxol-5-yl)-3-cyano-2-((diphenylphosphorothioyl)amino)propanoate (**8t**)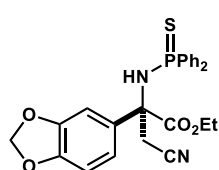

White powder; IR (KBr):  $\nu$  2252, 1733  $\text{cm}^{-1}$ ;  $^1\text{H}$  NMR (400 MHz,  $\text{CDCl}_3$ ):  $\delta$  7.93–7.80 (m, 4H), 7.49–7.42 (m, 6H), 6.83 (dd,  $J = 2.1, 8.2$  Hz, 1H), 6.74 (d,  $J = 2.0$  Hz, 1H), 6.64 (d,  $J = 8.2$  Hz, 1H), 5.90 (dd,  $J = 1.4, 14.7$  Hz, 2H), 4.36–4.28 (m, 1H), 4.24–4.14 (m, 3H), 3.59 (d,  $J = 16.5$  Hz, 1H), 1.20 (t,  $J = 7.2$  Hz, 3H);  $^{13}\text{C}$  NMR (100 MHz,  $\text{CDCl}_3$ ):  $\delta$  171.7 (d,  $J = 6.4$  Hz), 147.9, 147.8, 136.2, 135.1, 134.4, 133.3, 132.2, 132.1, 131.9 (d,  $J = 3.0$  Hz), 131.8 (d,  $J = 3.0$  Hz), 131.2, 131.1, 130.7, 130.6, 128.8, 128.6, 128.2, 128.1, 119.8, 117.0, 107.9, 106.8, 101.4, 64.8, 63.1, 28.2, 13.7;  $^{31}\text{P}$  NMR ( $\text{CDCl}_3$ ):  $\delta$  54.3; HRMS (ESI) Anal. calcd. for  $\text{C}_{25}\text{H}_{23}\text{O}_4\text{N}_2\text{NaPS}_2$   $m/z$  501.1008 [ $\text{M}+\text{Na}$ ] $^+$ , found 501.1004;  $[\alpha]_{\text{D}}^{25}$   $-7.5$  ( $c$  0.84,  $\text{CHCl}_3$ , 70% ee sample); Enantiomeric excess of the product was determined to be 70% ee by chiral stationary phase HPLC analysis (CHIRALPAK IC ( $\phi$  0.46 cm  $\times$  25 cm), 2-propanol/*n*-hexane = 1/9, flow rate 1.0 mL/min, detection at 254 nm,  $t_{\text{R}} = 50.7$  min (major), 57.5 min (minor)).

Racemic sample

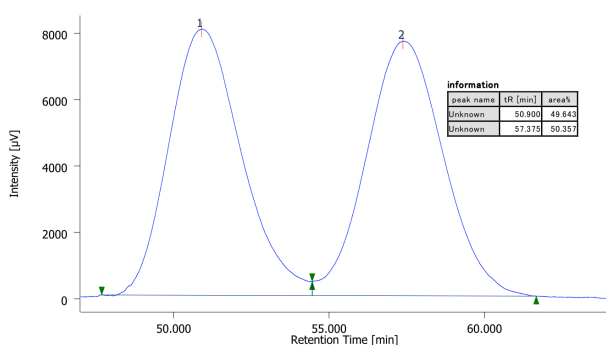

Reaction sample

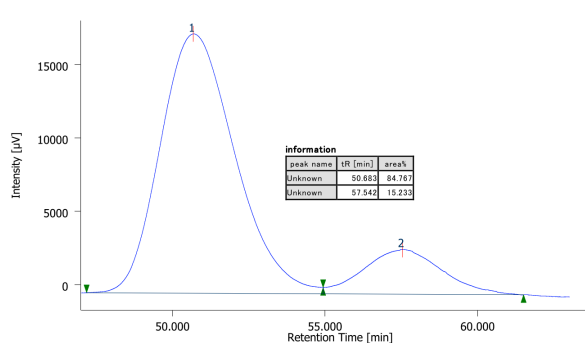

Enantioselective synthesis of  $\alpha,\alpha$ -disubstituted  $\alpha$ -amino acids via direct catalytic asymmetric addition of acetonitrile to  $\alpha$ -iminoesters

### Ethyl (R)-3-cyano-2-(2,3-dihydrobenzo[b][1,4]dioxin-6-yl)-2-((diphenylphosphorothioyl)amino)propanoate (8u)

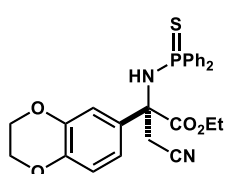

White powder; IR (KBr):  $\nu$  2251, 1732  $\text{cm}^{-1}$ ;  $^1\text{H}$  NMR (400 MHz,  $\text{CDCl}_3$ ):  $\delta$  7.94–7.89 (m, 2H), 7.85–7.80 (m, 2H), 7.50–7.42 (m, 6H), 6.85–6.80 (m, 2H), 6.70 (d,  $J$  = 8.5 Hz, 1H), 4.35–4.27 (m, 1H), 4.23–4.15 (m, 5H), 4.12–4.09 (m, 2H), 3.59 (d,  $J$  = 16.6 Hz, 1H), 1.20 (t,  $J$  = 7.2 Hz, 3H);  $^{13}\text{C}$  NMR (100 MHz,  $\text{CDCl}_3$ ):  $\delta$  171.7 (d,  $J$  = 6.0 Hz), 143.9, 143.2, 136.3, 135.2, 134.4, 133.4, 132.3, 132.1, 131.8 (d,  $J$  = 3.0 Hz), 131.7 (d,  $J$  = 3.0 Hz), 130.73, 130.69, 130.6, 128.7, 128.6, 128.3, 128.1, 119.0, 117.3, 117.1, 115.4, 64.5, 64.24, 64.21, 63.0, 28.2, 13.7;  $^{31}\text{P}$  NMR ( $\text{CDCl}_3$ ):  $\delta$  54.4; HRMS (ESI) Anal. calcd. for  $\text{C}_{26}\text{H}_{25}\text{O}_4\text{N}_2\text{NaPS}$   $m/z$  515.1165  $[\text{M}+\text{Na}]^+$ , found 515.1156;  $[\alpha]_{\text{D}}^{25}$   $-0.3$  ( $c$  1.05,  $\text{CHCl}_3$ , 62% ee sample); Enantiomeric excess of the product was determined to be 62% ee by chiral stationary phase HPLC analysis (CHIRALPAK IA ( $\phi$  0.46 cm  $\times$  25 cm), 2-propanol/*n*-hexane = 1/9, flow rate 1.0 mL/min, detection at 254 nm,  $t_{\text{R}}$  = 21.0 min (major), 26.2 min (minor)).

Racemic sample

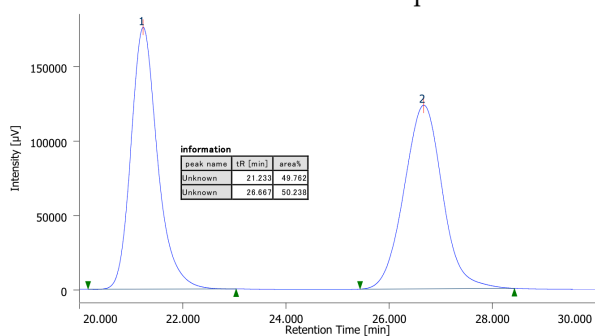

Reaction sample

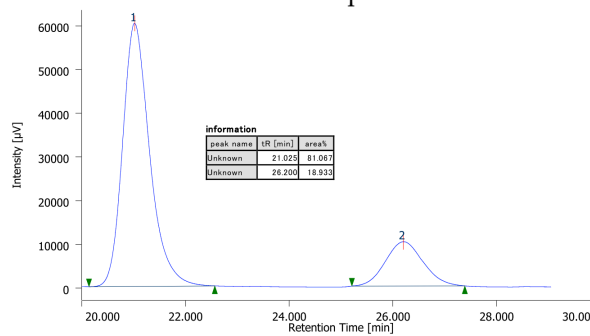

### Ethyl (S)-3-cyano-2-((diphenylphosphorothioyl)amino)-2-(thiophen-2-yl)propanoate (8v)

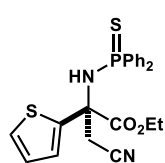

White powder; IR (KBr):  $\nu$  2252, 1734  $\text{cm}^{-1}$ ;  $^1\text{H}$  NMR (400 MHz,  $\text{CDCl}_3$ ):  $\delta$  7.95–7.88 (m, 4H), 7.53–7.43 (m, 6H), 7.27–7.25 (m, 1H), 7.07 (dd,  $J$  = 1.2, 3.7 Hz, 1H), 6.91 (dd,  $J$  = 3.7, 5.1 Hz, 1H), 4.29–4.21 (m, 1H), 4.16–4.01 (m, 3H), 3.84 (d,  $J$  = 16.8 Hz, 1H), 1.10 (t,  $J$  = 7.2 Hz, 3H);  $^{13}\text{C}$  NMR (100 MHz,  $\text{CDCl}_3$ ):  $\delta$  170.2 (d,  $J$  = 4.0 Hz), 142.4, 142.3, 135.9, 135.0, 134.8, 134.0, 132.0 (d,  $J$  = 3.0 Hz), 131.84 (d,  $J$  = 3.0 Hz), 131.80, 131.7, 131.1, 131.0, 128.63, 128.59, 128.50, 128.46, 127.2, 126.5, 126.1, 116.8, 63.2, 63.1, 29.4, 13.5;  $^{31}\text{P}$  NMR ( $\text{CDCl}_3$ ):  $\delta$  55.3; HRMS (ESI) Anal. calcd. for  $\text{C}_{22}\text{H}_{21}\text{O}_2\text{N}_2\text{NaPS}_2$   $m/z$  463.0674  $[\text{M}+\text{Na}]^+$ , found 463.0667;  $[\alpha]_{\text{D}}^{25}$   $-11.5$  ( $c$  0.69,  $\text{CHCl}_3$ , 50% ee sample); Enantiomeric excess of the product was determined to be 50% ee by chiral stationary phase HPLC analysis (CHIRALPAK IA ( $\phi$  0.46 cm  $\times$  25 cm), 2-propanol/*n*-hexane = 1/20, flow rate 1.0 mL/min, detection at 254 nm, 18.3 min (minor),  $t_{\text{R}}$  = 20.5 min (major)).

Racemic sample

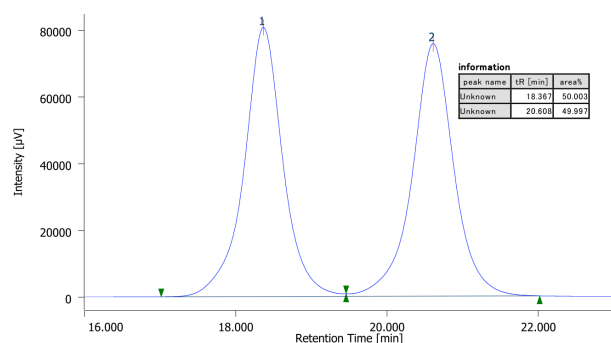

Reaction sample

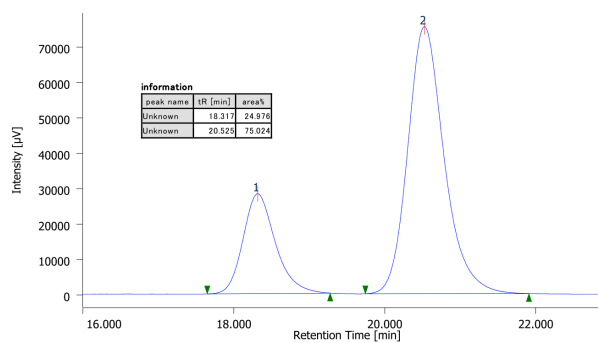

### 4.3. Transformation of the Mannich product.

To a solution of **8a** (400 mg, 0.92 mmol) in a mixture of EtOAc/AcOH (v/v: 4/1), (5 mL),  $\text{H}_2\text{O}_2$  (35 wt %), (1.0 mL) was added dropwise at room temperature. The reaction was quenched with sat.  $\text{NaHCO}_3$  solution after **8a** disappeared on TLC monitoring. The mixture was extracted with ethyl acetate, and the organic layers were combined and dried over anhydrous  $\text{Na}_2\text{SO}_4$ . After filtration and concentration under reduced pressure, the crude mixture was purified by silica gel column chromatography to afford the desired product in quantitative yield.

Enantioselective synthesis of  $\alpha,\alpha$ -disubstituted  $\alpha$ -amino acids via direct catalytic asymmetric addition of acetonitrile to  $\alpha$ -iminoesters

To a solution of the thus-obtained *N*-phosphinoylamide (41.8 mg, 0.1 mmol) in EtOAc (0.5 mL), 4 N HCl (1.5 mL) was added dropwise at room temperature. After stirring at 60 °C for 2.5 h, the resulting mixture was concentrated, and redissolved in EtOAc (1.5 mL), H<sub>2</sub>O (1.5 mL) was added and cooled to 0 °C. To the biphasic mixture, NaHCO<sub>3</sub> (420 mg, 5 mmol) and Cbz-Cl (72  $\mu$ L, 0.5 mmol) were added and was stirred for 4 h. The solution was diluted with H<sub>2</sub>O and extracted with EtOAc. The combined organic layers were washed with brine, dried (NaSO<sub>4</sub>) and concentrated. The reaction mixture was purified by preparative TLC (hexane/acetone = 5/1) to give pure product **11** (22.4 mg, 64% yield).

#### Ethyl (*R*)-2-(((benzyloxy)carbonyl)amino)-3-cyano-2-phenylpropanoate (**11**)

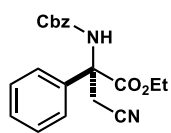

White powder; IR (CHCl<sub>3</sub>):  $\nu$  2257, 1726 cm<sup>-1</sup>; <sup>1</sup>H NMR (400 MHz, CDCl<sub>3</sub>):  $\delta$  7.41–7.26 (m, 10H), 6.21 (s, 1H), 5.16–5.06 (m, 2H); 4.26–4.20 (m, 2H), 3.80–3.70 (m, 2H), 1.19 (t, *J* = 7.1 Hz, 3H); <sup>13</sup>C NMR (100 MHz, CDCl<sub>3</sub>):  $\delta$  169.6, 154.7, 136.5, 135.8, 129.21, 129.18, 128.6, 128.3, 128.1, 125.2, 116.6, 67.3, 63.2, 63.1, 25.2, 13.8; HRMS (ESI) Anal. calcd. for C<sub>20</sub>H<sub>20</sub>O<sub>4</sub>N<sub>2</sub>Na *m/z* 375.1315 [M+Na]<sup>+</sup>, found 375.1314; [ $\alpha$ ]<sub>D</sub><sup>25</sup> 1.4 (c 0.88, CHCl<sub>3</sub>, from 65% ee sample).

## 5. Kinetic Experiments

### General procedure for initial rate kinetic experiments

A flame-dried 20 mL test tube equipped with a magnetic stirring bar and 3-way glass stopcock was charged with [Ir(cod)(OMe)]<sub>2</sub> (3.3 mg, 0.005 mmol), NHC precursor (5.0 mg, 0.01 mmol) under Ar atmosphere and THF (0.5 mL) was added at room temperature, then Barton's base (20.0  $\mu$ L, 0.1 mmol) was added. The mixture was stirred at room temperature for 0.5 h and then cooled to 0 °C. Ketimine (0.1 mmol) in THF (0.5 mL) was added via a gas-tight syringe with a stainless steel needle under an Ar atmosphere. Then MeCN (210  $\mu$ L, 4 mmol) was added via a gas-tight syringe with a stainless steel needle under an Ar atmosphere. Aliquots were taken at 1 h intervals by removing a small amount (ca. 0.1 mL) of the reaction solution and quenched it immediately with AcOH (0.1 mL, 0.1 M in THF), then passing it through a small silica gel plug, eluting with THF. After evaporation, the residue analyzed by <sup>1</sup>H NMR spectroscopy to determine the yield based on the relative integration values of the peaks at 4.47 ppm (for ketimine) and 3.66 ppm (for product).

### 5.1 Determination of the reaction order in ketimine.

The reaction with different concentration of ketimine (0.1 mmol, 0.2 mmol, 0.3 mmol and 0.4 mmol) at 81.3, 162.6, 243.9 and 325.2 mM were performed according to the general procedure described above except for varying the amount of ketimine added, and the results were summarized in the **Table S1** and **Figure S1** below.

**Table S1. Initial rates of varying concentration of ketimine**

| [ketimine] (mM) | <i>d</i> [Product]/ <i>dt</i> (mM/h) |
|-----------------|--------------------------------------|
| 81.3            | 3.03                                 |
| 162.6           | 3.86                                 |
| 243.9           | 4.56                                 |
| 325.2           | 4.94                                 |

Enantioselective synthesis of  $\alpha,\alpha$ -disubstituted  $\alpha$ -amino acids via direct catalytic asymmetric addition of acetonitrile to  $\alpha$ -iminoesters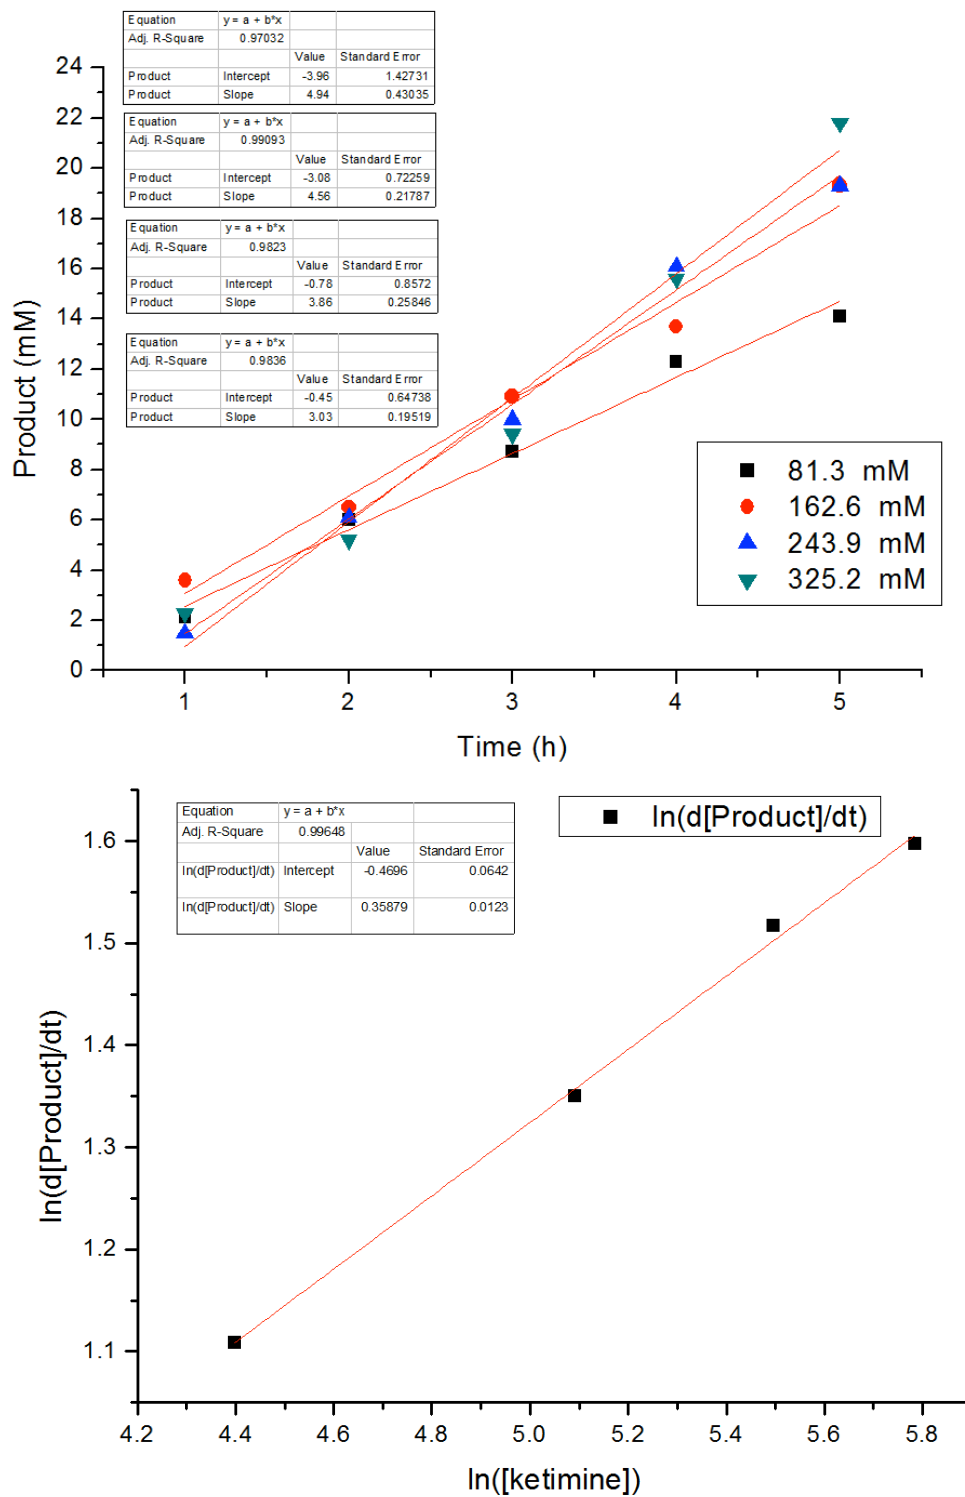Figure S1. (a) Initial rate kinetic experiments for ketimine. (b) Plot of  $\ln(d[\text{Product}]/dt)$  versus  $\ln([\text{ketimine}])$

Enantioselective synthesis of  $\alpha,\alpha$ -disubstituted  $\alpha$ -amino acids via direct catalytic asymmetric addition of acetonitrile to  $\alpha$ -iminoesters

## 5.2 Determination of the reaction order in MeCN.

The reaction with different concentration of MeCN (2 mmol, 3 mmol, 4 mmol and 5 mmol) at 1777.8, 2553.2, 3561.9 and 3906.3 mM were performed according to the general procedure described above except for varying the amount of MeCN added, and the results were summarized in the **Table S2** and **Figure S2** below.

**Table S2. Initial rates of varying concentration of MeCN**

| [MeCN] (mM) | $d[\text{Product}]/dt$ (mM/h) |
|-------------|-------------------------------|
| 1777.8      | 2.09                          |
| 2553.2      | 2.45                          |
| 3561.9      | 2.99                          |
| 3906.3      | 3.44                          |

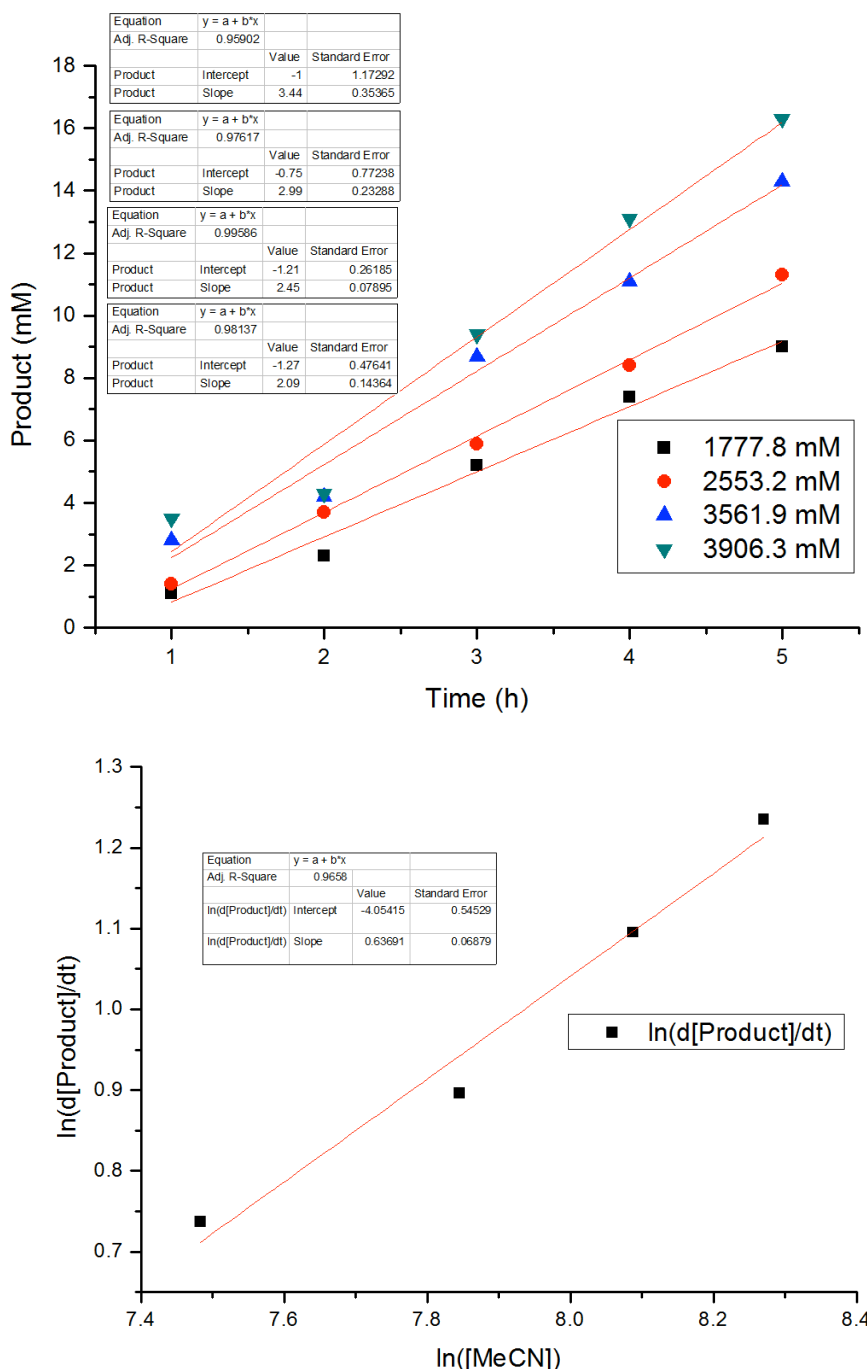

**Figure S2. (a) Initial rate kinetic experiments for MeCN. (b) Plot of  $\ln(d[\text{Product}]/dt)$  versus  $\ln([\text{MeCN}])$**



Enantioselective synthesis of  $\alpha,\alpha$ -disubstituted  $\alpha$ -amino acids via direct catalytic asymmetric addition of acetonitrile to  $\alpha$ -iminoesters

### 5.3 Determination of the reaction order in catalyst.

The reaction with different concentration of catalyst (5 mol%, 7.5 mol% and 10 mol%) at 4.1, 6.1 and 8.1 mM were performed according to the general procedure described above except for varying the amount of catalyst added, and the results were summarized in the **Table S3** and **Figure S3** below.

**Table S3. Initial rates of varying concentration of catalyst**

| [Catalyst] (mM) | $d[\text{Product}]/dt$ (mM/h) |
|-----------------|-------------------------------|
| 4.1             | 1.99                          |
| 6.1             | 2.91                          |
| 8.1             | 3.67                          |

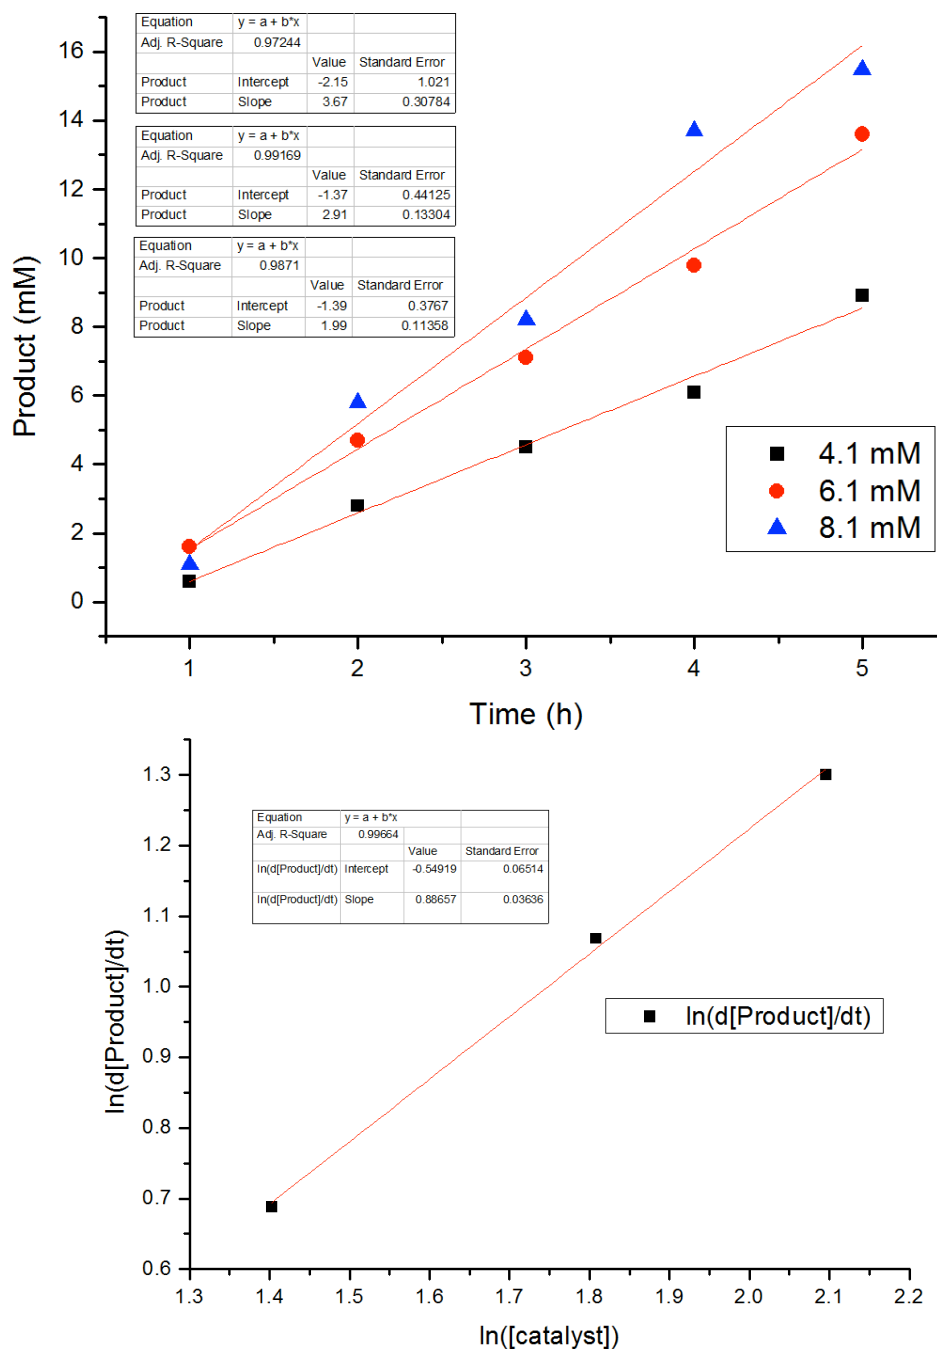

**Figure S3. (a) Initial rate kinetic experiments for catalyst. (b) Plot of  $\ln(d[\text{Product}]/dt)$  versus  $\ln([\text{catalyst}])$**

## 6. Kinetic Isotope Effects

A flame-dried 20 mL test tube equipped with a magnetic stirring bar and 3-way glass stopcock was charged with  $[\text{Ir}(\text{cod})(\text{OMe})_2]$  (3.3 mg, 0.005 mmol), NHC precursor (5.0 mg, 0.01 mmol) under Ar atmosphere and THF (0.5 mL) was added at room temperature, then Barton's base (20.0  $\mu\text{L}$ , 0.1 mmol) was added. The mixture was stirred at room temperature for 0.5 h and then cooled to 0  $^\circ\text{C}$ . *para-F* Substituted ketimine (0.1 mmol) in THF (0.5 mL) was added via a gas-tight syringe with a stainless steel needle under an Ar atmosphere. Then MeCN (210  $\mu\text{L}$ , 4 mmol) was added via a gas-tight syringe with a stainless steel needle under an Ar atmosphere. Aliquots were taken at 1 h intervals by removing a small amount (ca. 0.1 mL) of the reaction solution and quenched it immediately with AcOH (0.1 mL, 0.1 M in THF), then passing it through a small silica gel plug, eluting with THF. After evaporation, the residue analyzed by  $^{19}\text{F}$  NMR spectroscopy to determine the yield based on the relative integration values of the peaks at  $-103.5$  ppm (for ketimine) and  $-112.4$  (for product).

The reaction with  $\text{CD}_3\text{CN}$  was performed independently under the identical reaction condition. The results were summarized in the **Table S4** and **Figure S4** below. Based on the slopes in **Figure S4**, the value of kinetic isotope effect was calculated to be  $k_{\text{H}}/k_{\text{D}} = 2.27/0.62 = 3.7$ , suggesting the presence of primary kinetic isotope effects.

**Table S4.** Comparison of initial rates of  $\text{CH}_3\text{CN}$  and  $\text{CD}_3\text{CN}$

| Time (h) | [Product] (mM)/<br>$\text{CH}_3\text{CN}$ | [Product] (mM)/<br>$\text{CD}_3\text{CN}$ |
|----------|-------------------------------------------|-------------------------------------------|
| 1h       | 2.2                                       | 1.3                                       |
| 2h       | 4.1                                       | 1.9                                       |
| 3h       | 6.3                                       | 2.3                                       |
| 4h       | 8.6                                       | 3.1                                       |
| 5h       | 11.3                                      | 3.8                                       |

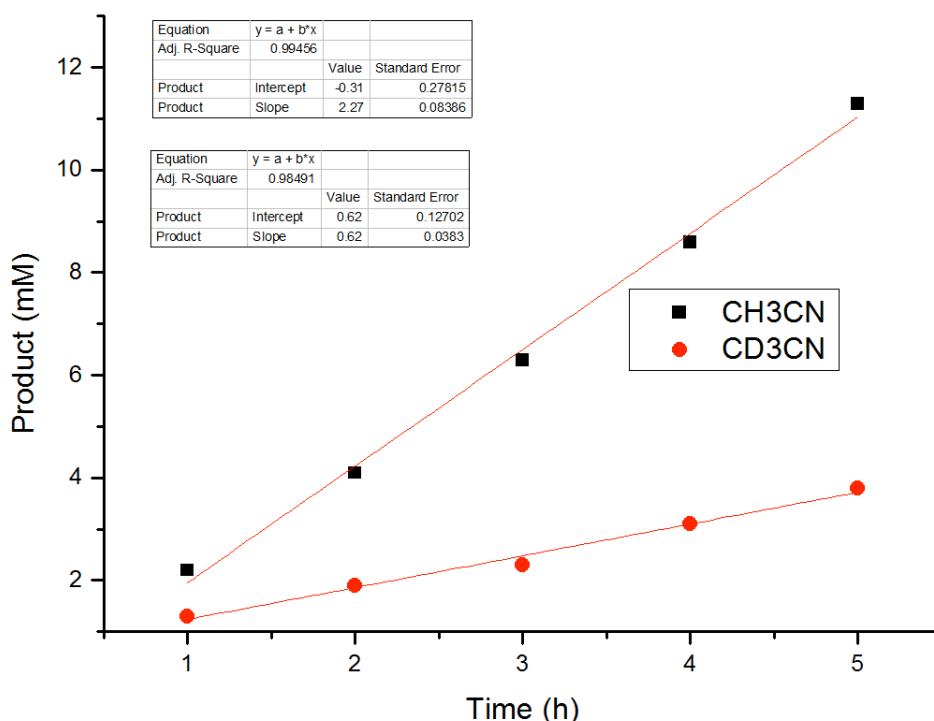

**Figure S4.** Initial rate kinetic experiments for  $\text{CH}_3\text{CN}$  and  $\text{CD}_3\text{CN}$

## 7. Determination of Absolute Configuration

To **8a** (after enrichment by chiral stationary phase HPLC) in a mixture of EtOAc/AcOH (v/v: 4/1), (5 mL), H<sub>2</sub>O<sub>2</sub> (35 wt %), (1.0 mL) was added dropwise at room temperature. The reaction was quenched with sat. NaHCO<sub>3</sub> solution after **8a** disappeared on TLC at room temperature. The mixture was extracted with ethyl acetate, and the organic layers were combined and dried over anhydrous Na<sub>2</sub>SO<sub>4</sub>. After filtration and concentration under reduced pressure, the obtained crude mixture was purified by silica gel column chromatography to afford **S1**. **S1** in Et<sub>2</sub>O was left at room temperature to grow a single crystal. Single-crystal X-ray data were collected on a Rigaku R-Axis RAPID II imaging plate area detector with graphite-monochromated Cu-K $\alpha$  radiation. Data collection was conducted at 93 K. All structures were solved by direct methods and refined by full matrix least-squares against  $F^2$  with all reflections. All non-hydrogen atoms were refined anisotropically. All hydrogen atoms were placed in standard calculated positions, and were refined using the riding model. Refined structure and crystallographic parameters are summarized in Figure S1 and Table S1. The absolute and relative configuration of **S1** was determined to be as depicted below by Flack parameter.<sup>3</sup> CCDC 1498698 contains the supplementary crystallographic data for **S1**.

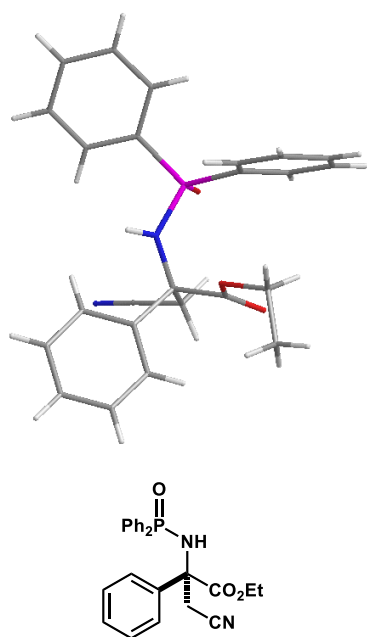

**Figure S1.** The structure of **S1** in the solid state. Color code: White: hydrogen; gray: carbon; blue: nitrogen; red: oxygen; purple: phosphorus.

**Table S1.** Selected Crystallographic Data of **S1**

|                                              | <b>S1</b>                                                       |
|----------------------------------------------|-----------------------------------------------------------------|
| molecular formula                            | C <sub>24</sub> H <sub>23</sub> N <sub>2</sub> O <sub>3</sub> P |
| formula weight                               | 418.43                                                          |
| crystal color, habit                         | colorless, needle                                               |
| crystal system                               | orthorhombic                                                    |
| space group                                  | <i>P</i> 2 <sub>1</sub> 2 <sub>1</sub> 2 <sub>1</sub> (#19)     |
| cell constants:                              |                                                                 |
| <i>a</i> (Å)                                 | 10.03760(18)                                                    |
| <i>b</i> (Å)                                 | 11.6437(2)                                                      |
| <i>c</i> (Å)                                 | 18.2329(3)                                                      |
| $\alpha$ (deg)                               | 90.0000                                                         |
| $\beta$ (deg)                                | 90.0000                                                         |
| $\gamma$ (deg)                               | 90.0000                                                         |
| <i>V</i> (Å <sup>3</sup> )                   | 2130.97(7)                                                      |
| <i>Z</i>                                     | 4                                                               |
| $\rho_{\text{calcd.}}$ (g·cm <sup>-3</sup> ) | 1.304                                                           |
| <i>R</i> <sub>1</sub>                        | 0.0653                                                          |
| <i>wR</i> <sub>2</sub>                       | 0.1523                                                          |
| <i>F</i> (000)                               | 880.00                                                          |
| Flack parameter                              | 0.012(13)                                                       |

The relative and absolute configurations of other products were deduced by analogy.

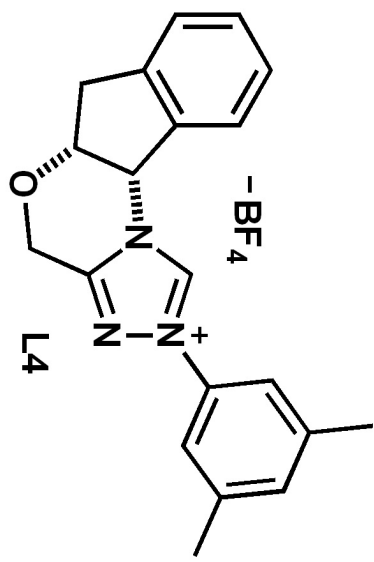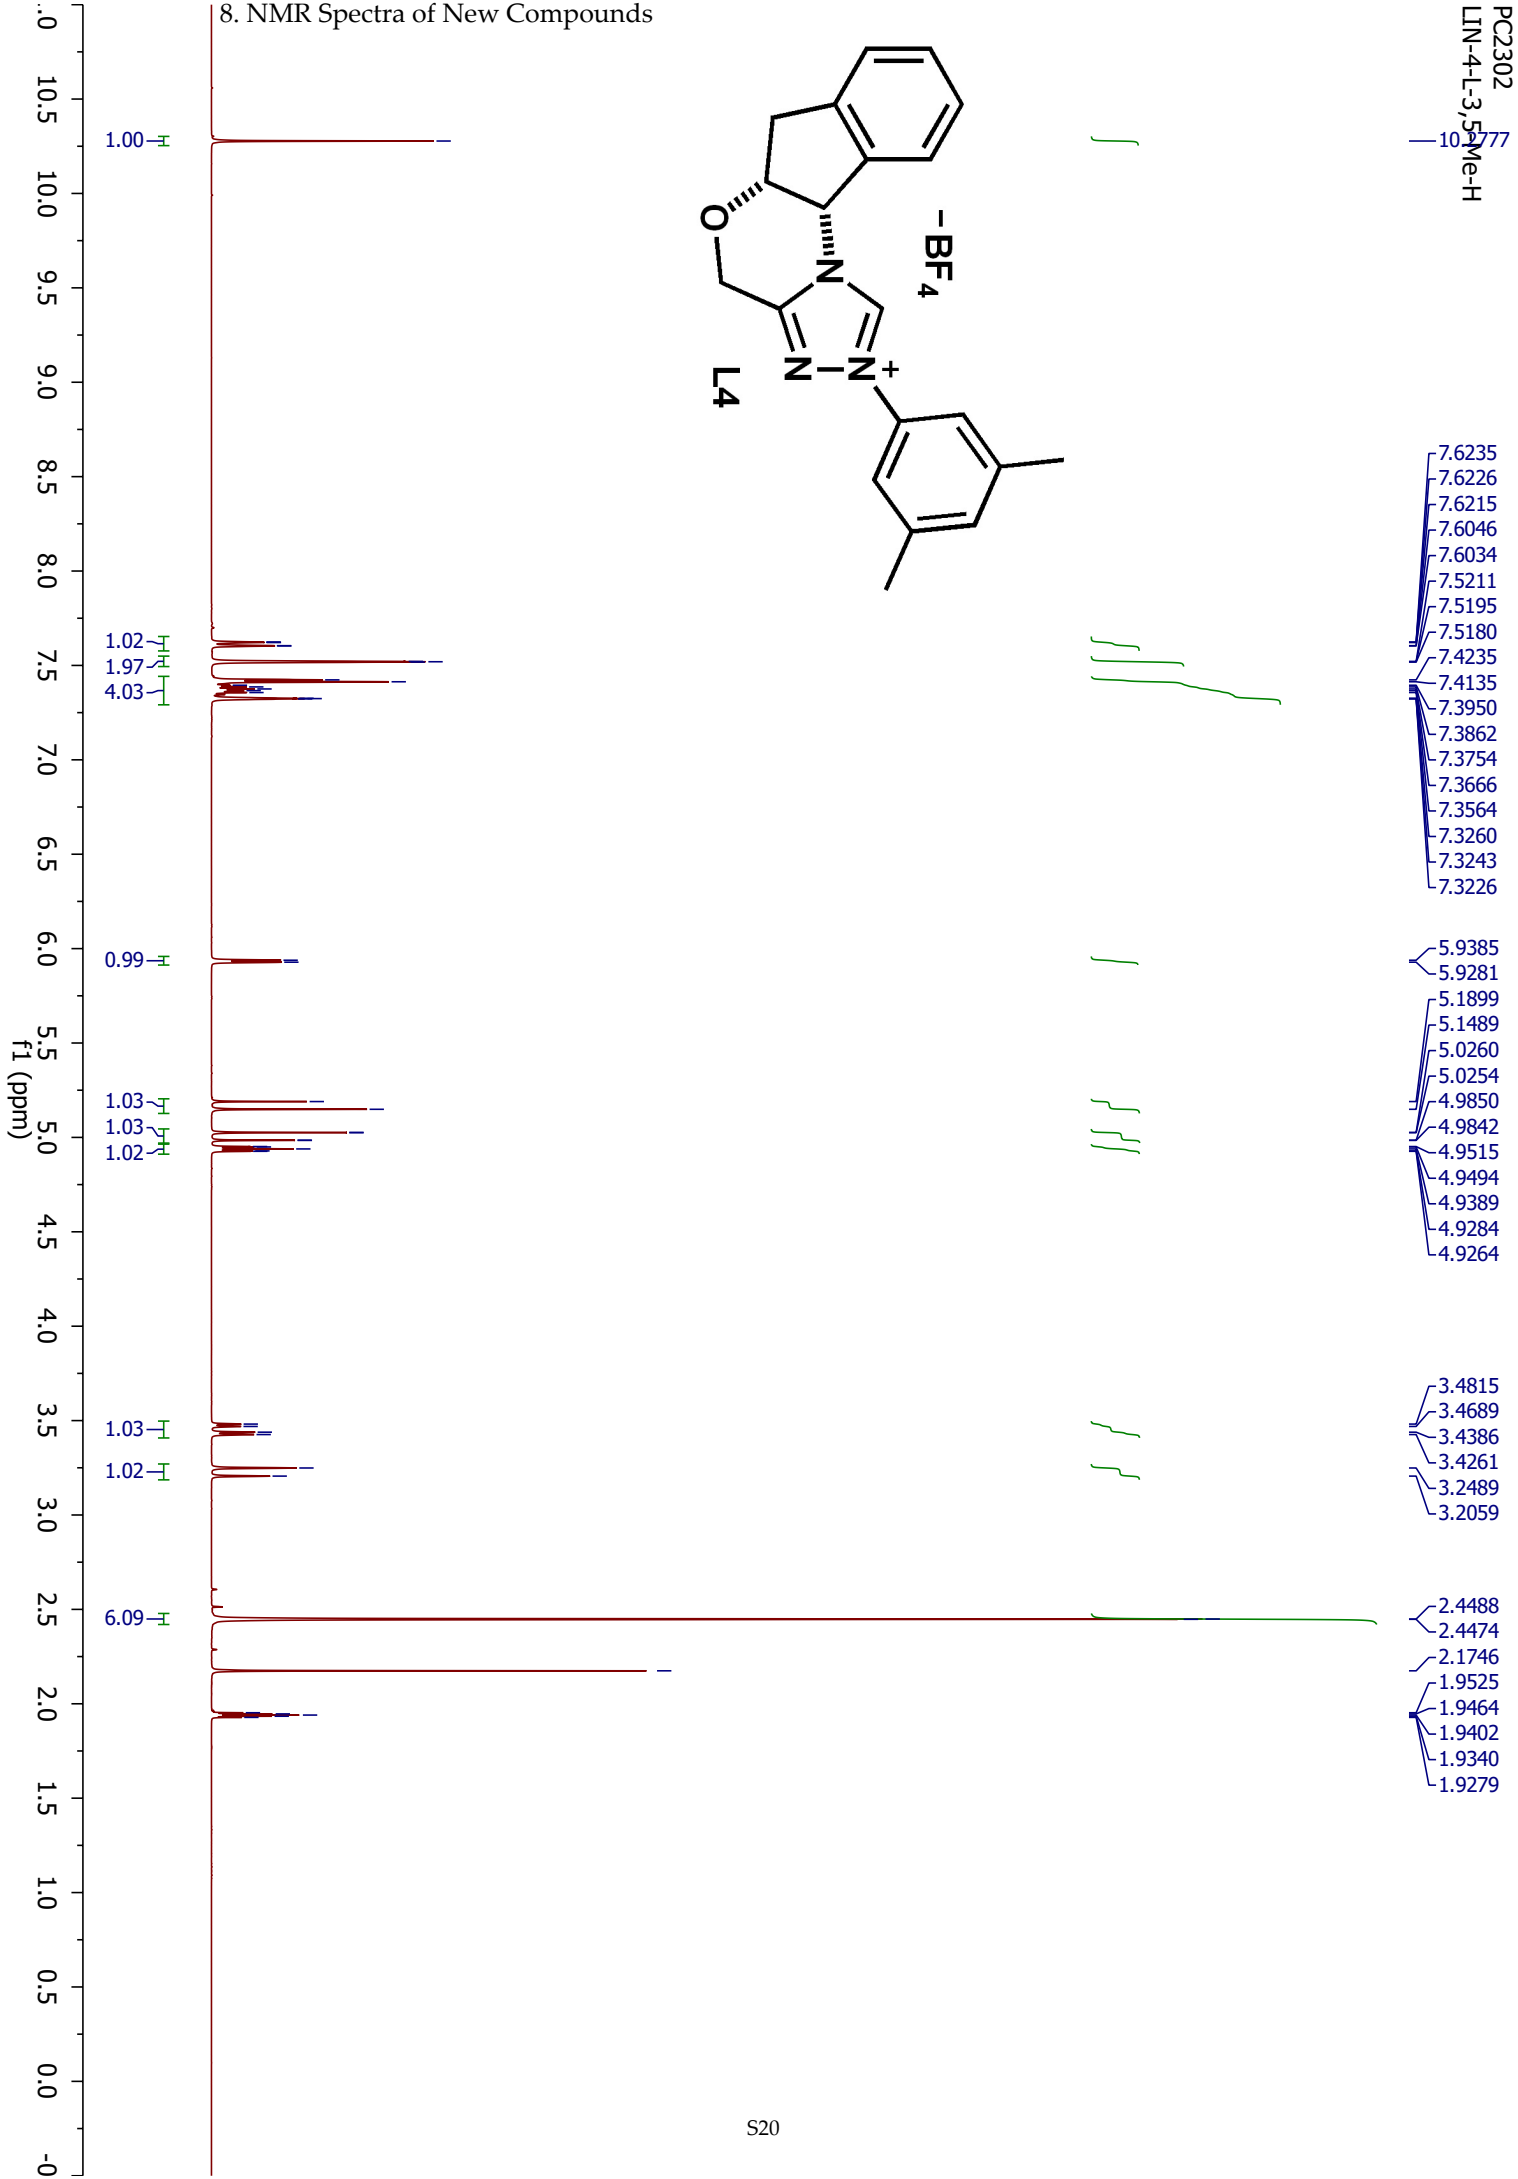

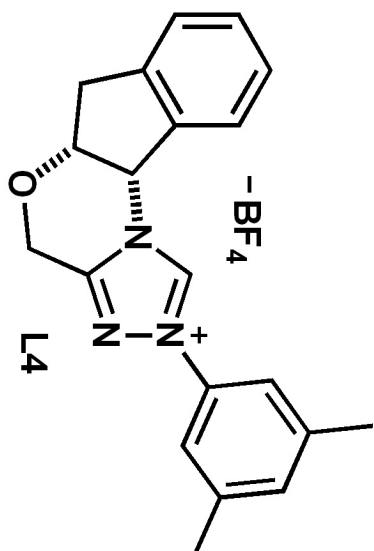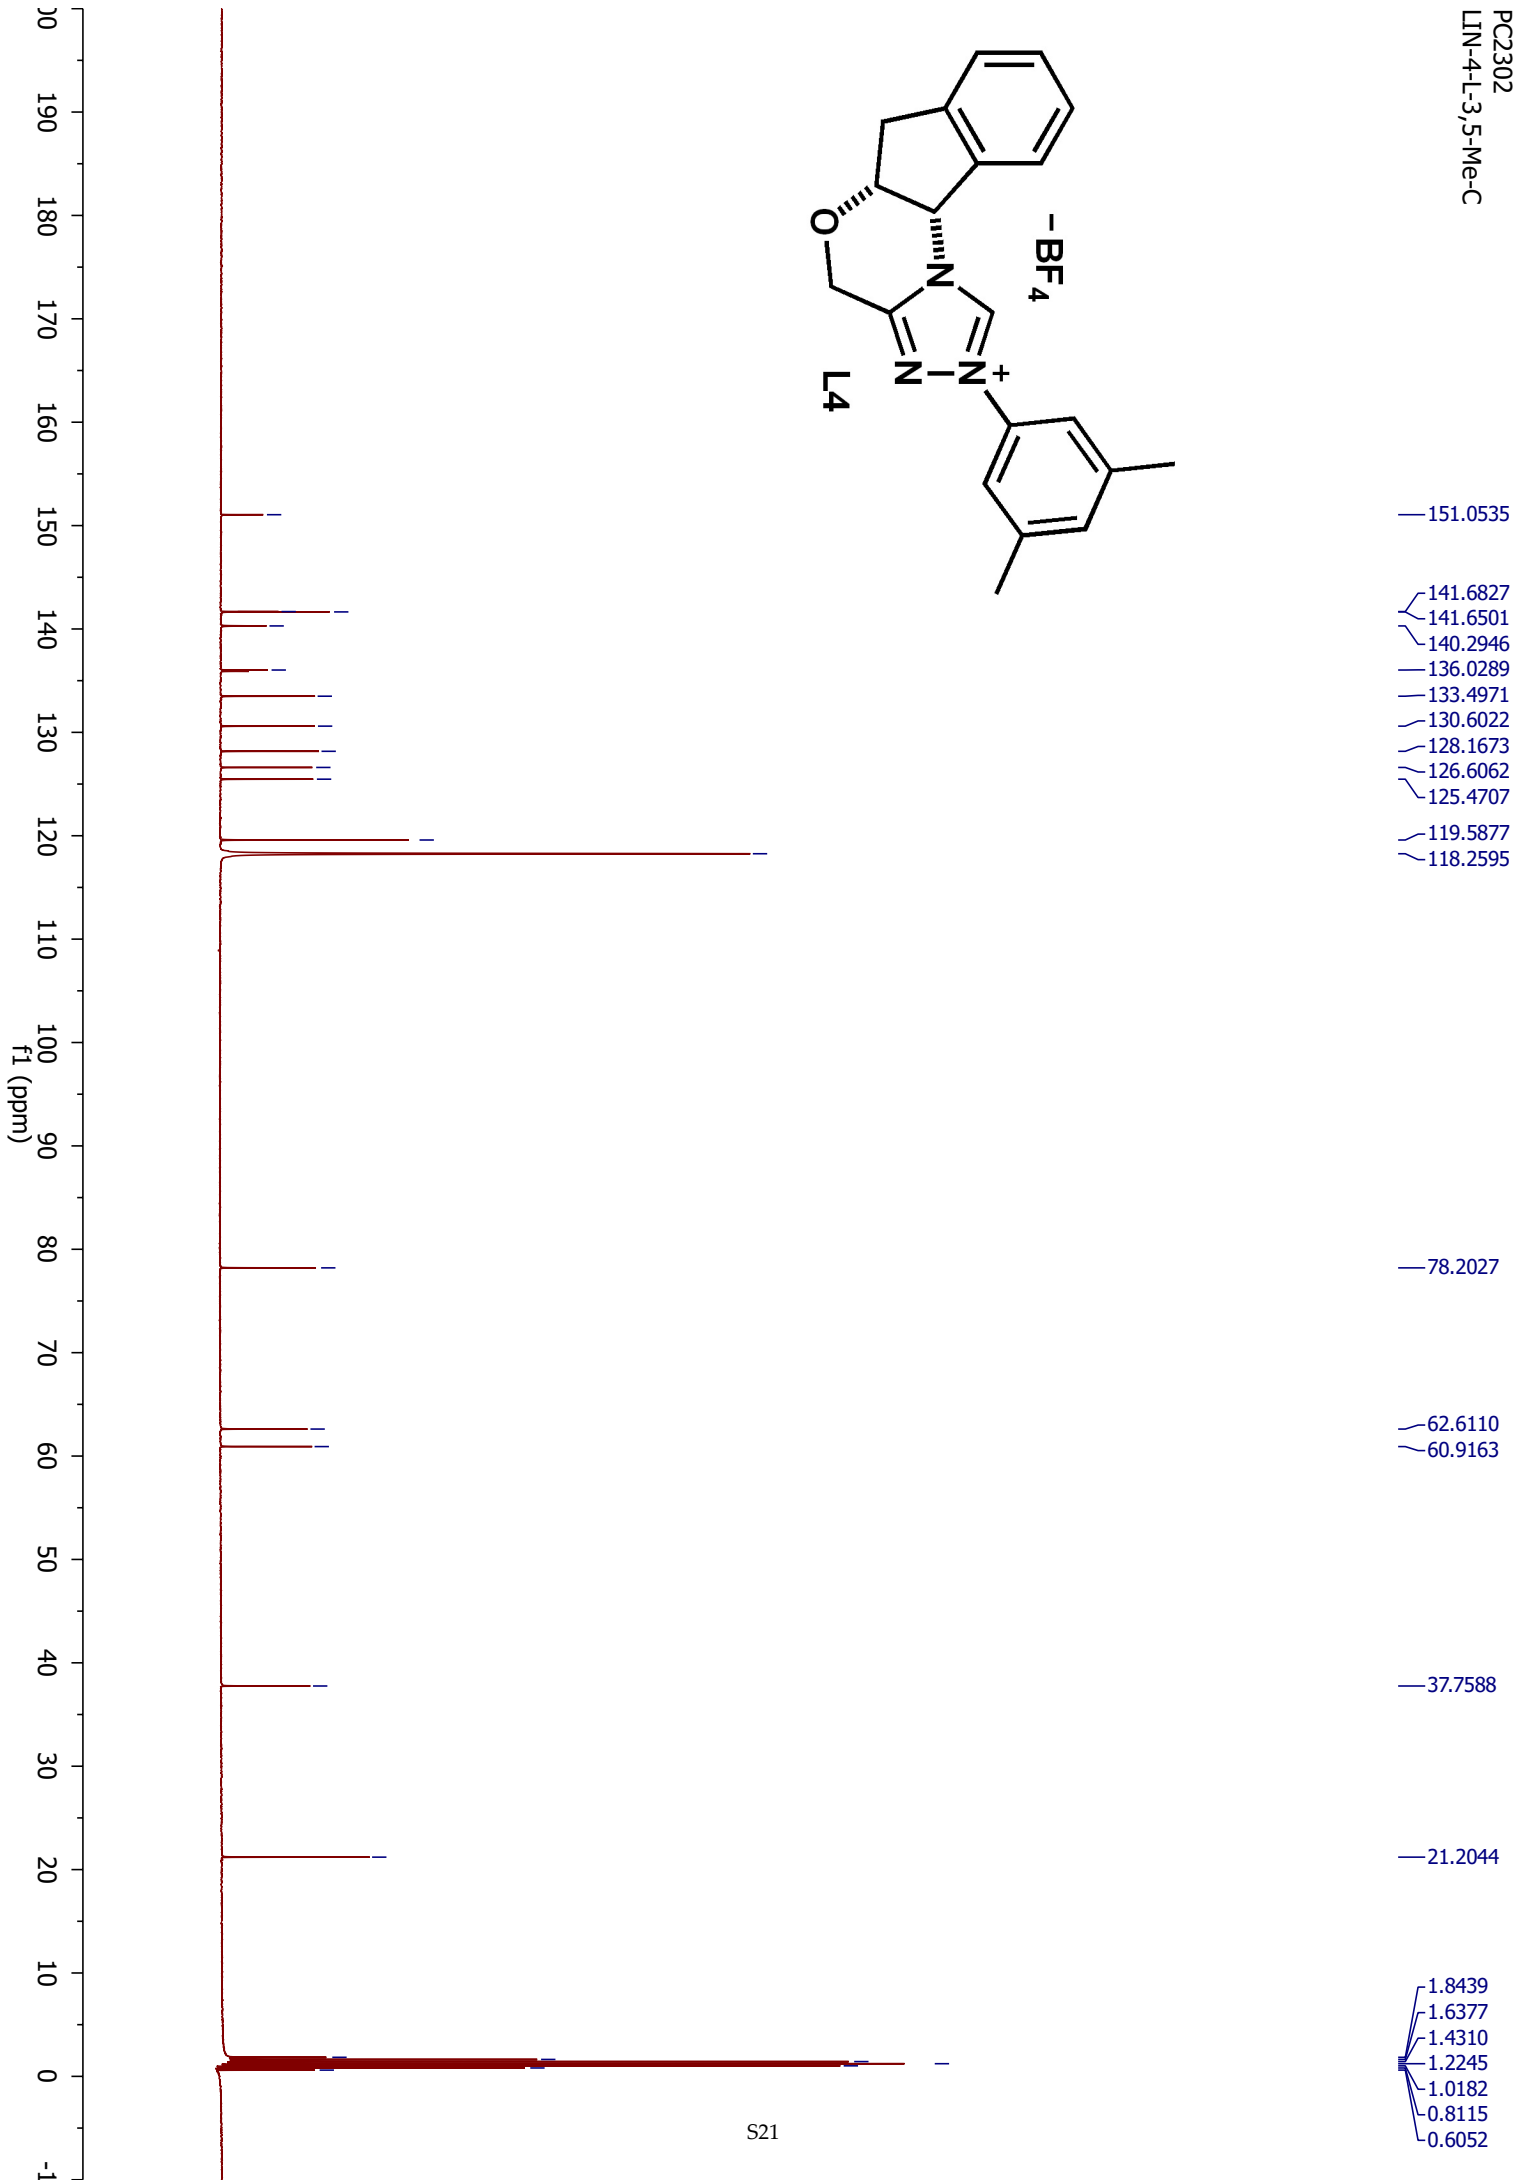

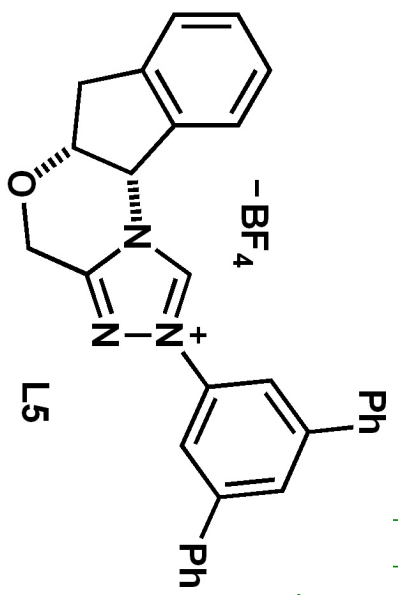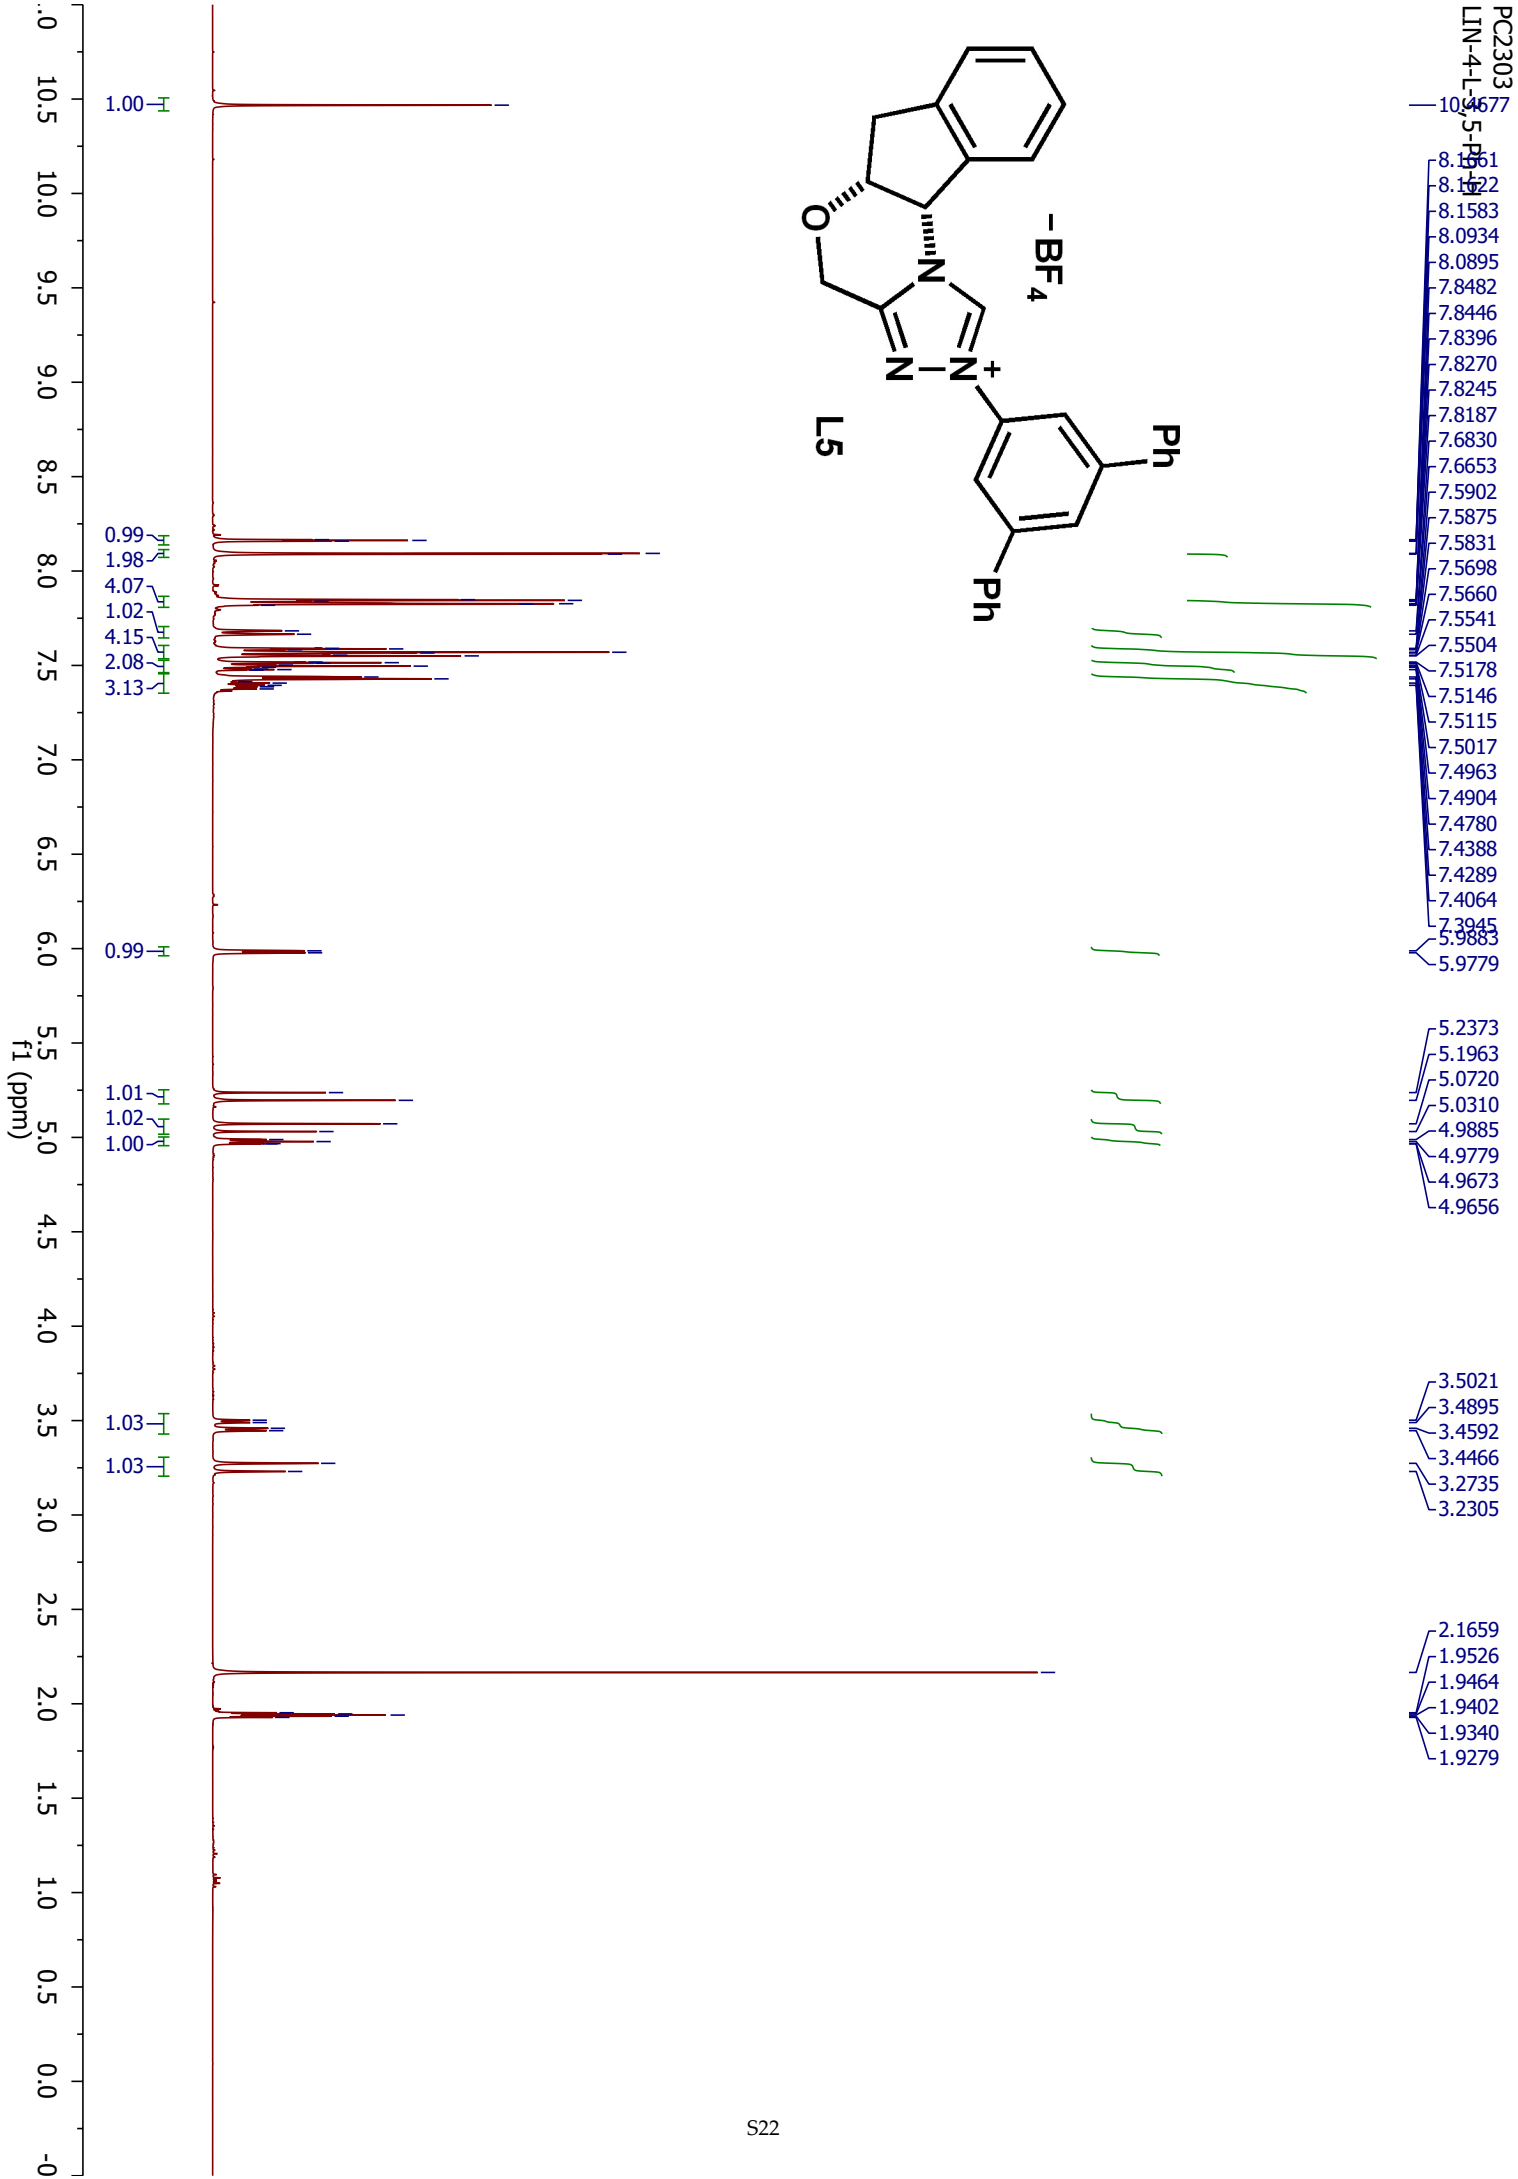

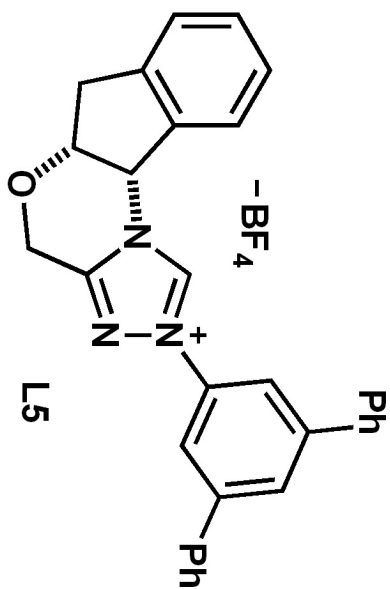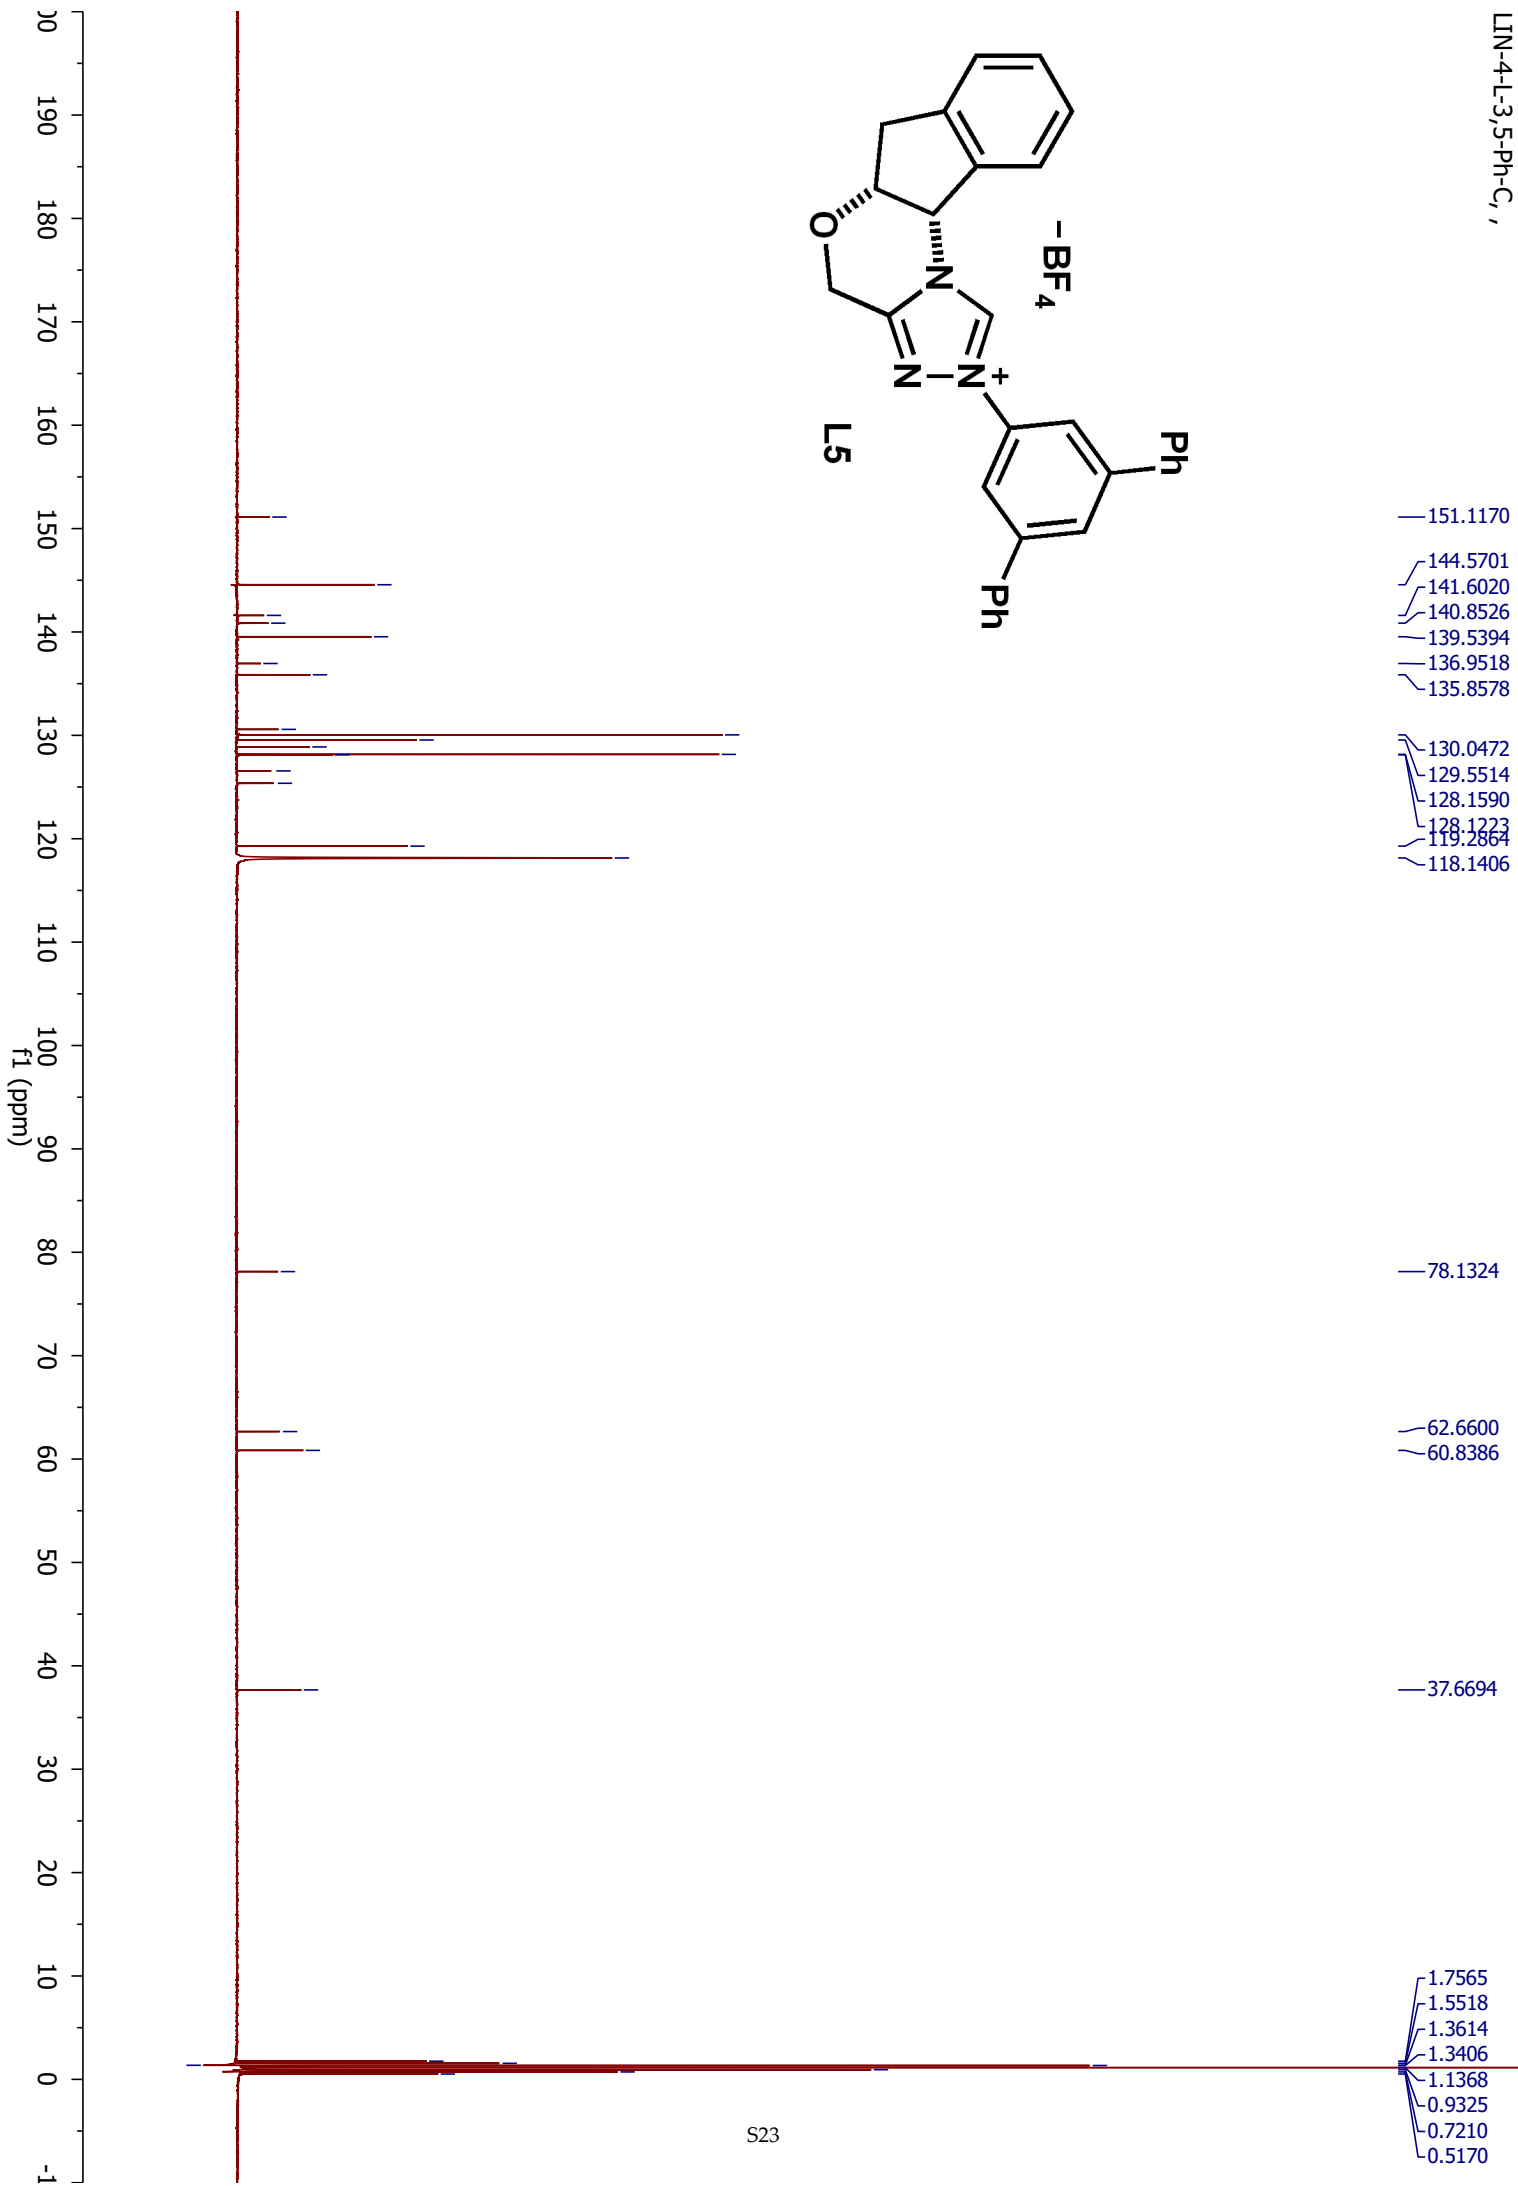

PC2304  
 LIN-4-1-1-N<sup>+</sup>ph<sub>2</sub>-h  
 10.8393  
 8.2874  
 8.2766  
 8.1567  
 8.1519  
 8.1331  
 7.8788  
 7.8768  
 7.8727  
 7.8702  
 7.8671  
 7.8515  
 7.8486  
 7.7683  
 7.7479  
 7.7356  
 7.7314  
 7.7291  
 7.7226  
 7.7173  
 7.7118  
 7.7022  
 7.6983  
 7.5796  
 7.5610  
 7.4476  
 7.4457  
 7.4398  
 7.4341  
 7.4330  
 6.0325  
 6.0220  
 5.2624  
 5.2213  
 5.1124  
 5.0714  
 5.0310  
 5.0291  
 5.0184  
 5.0077  
 5.0059  
 3.5337  
 3.5210  
 3.4907  
 3.4780  
 3.3026  
 3.2595  
 2.1583  
 1.9526  
 1.9464  
 1.9402  
 1.9340  
 1.9279

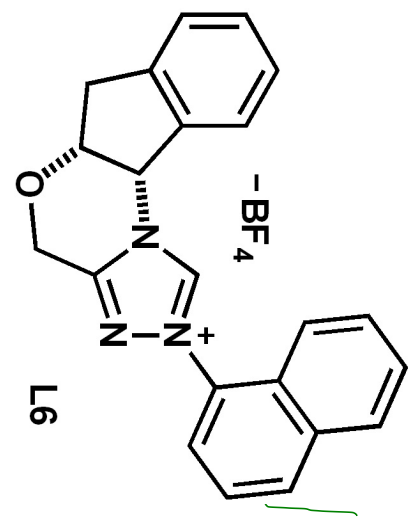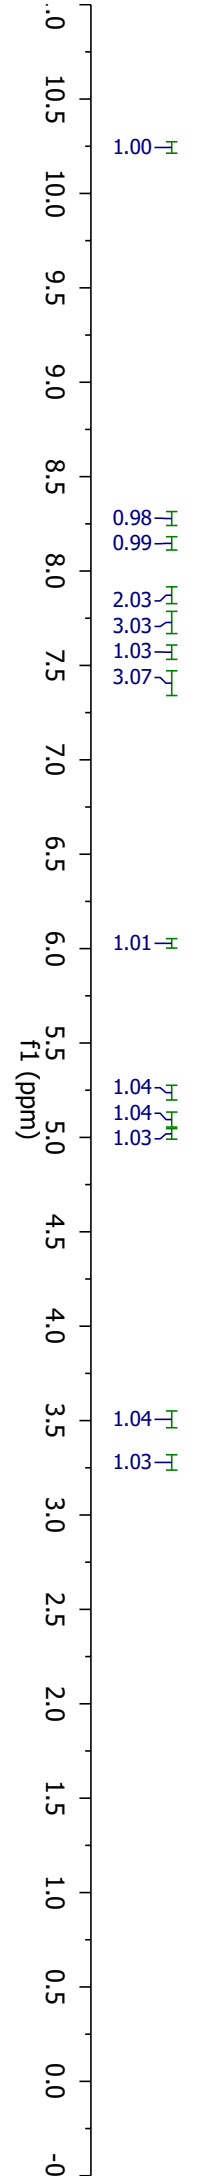



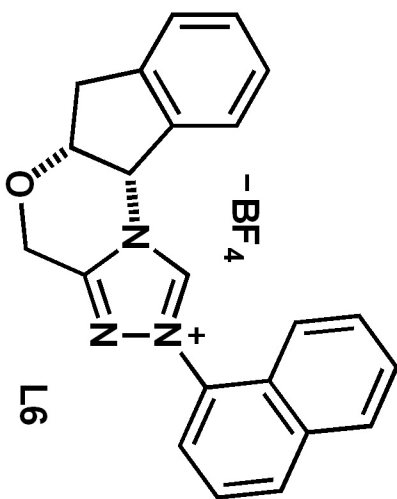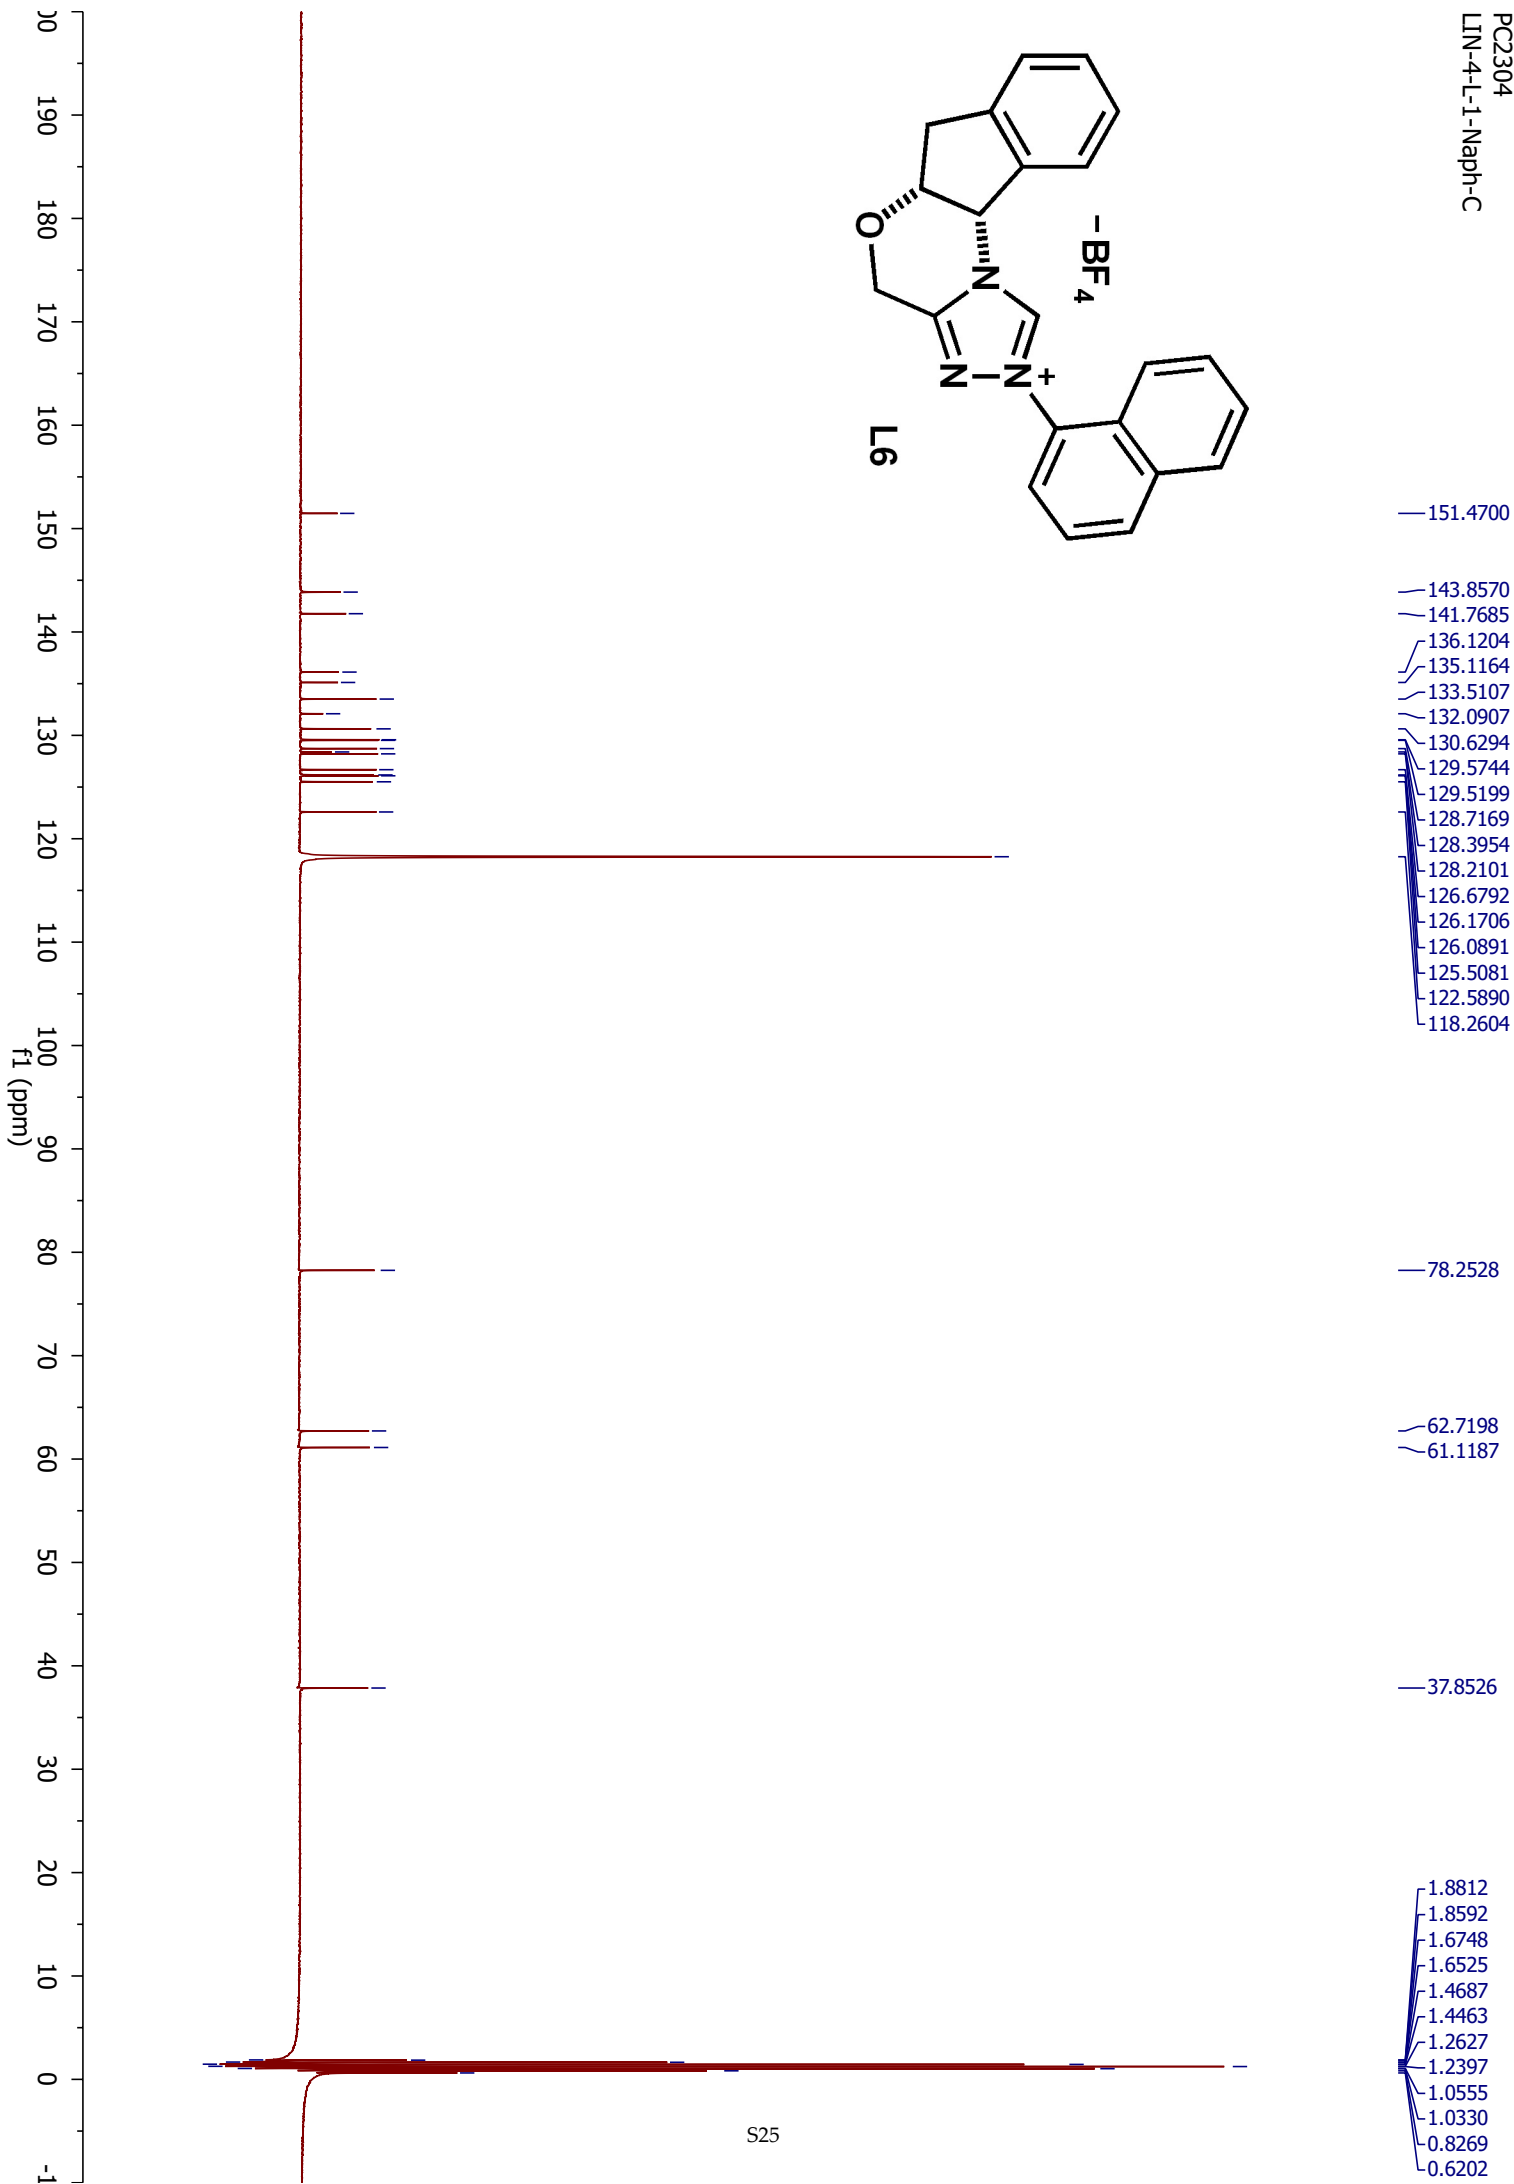

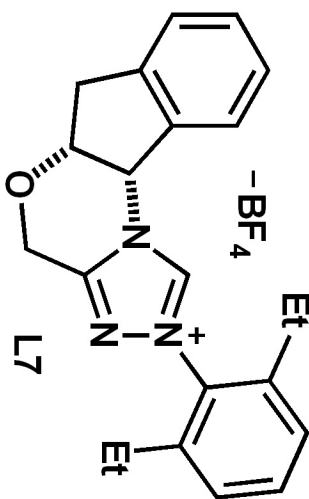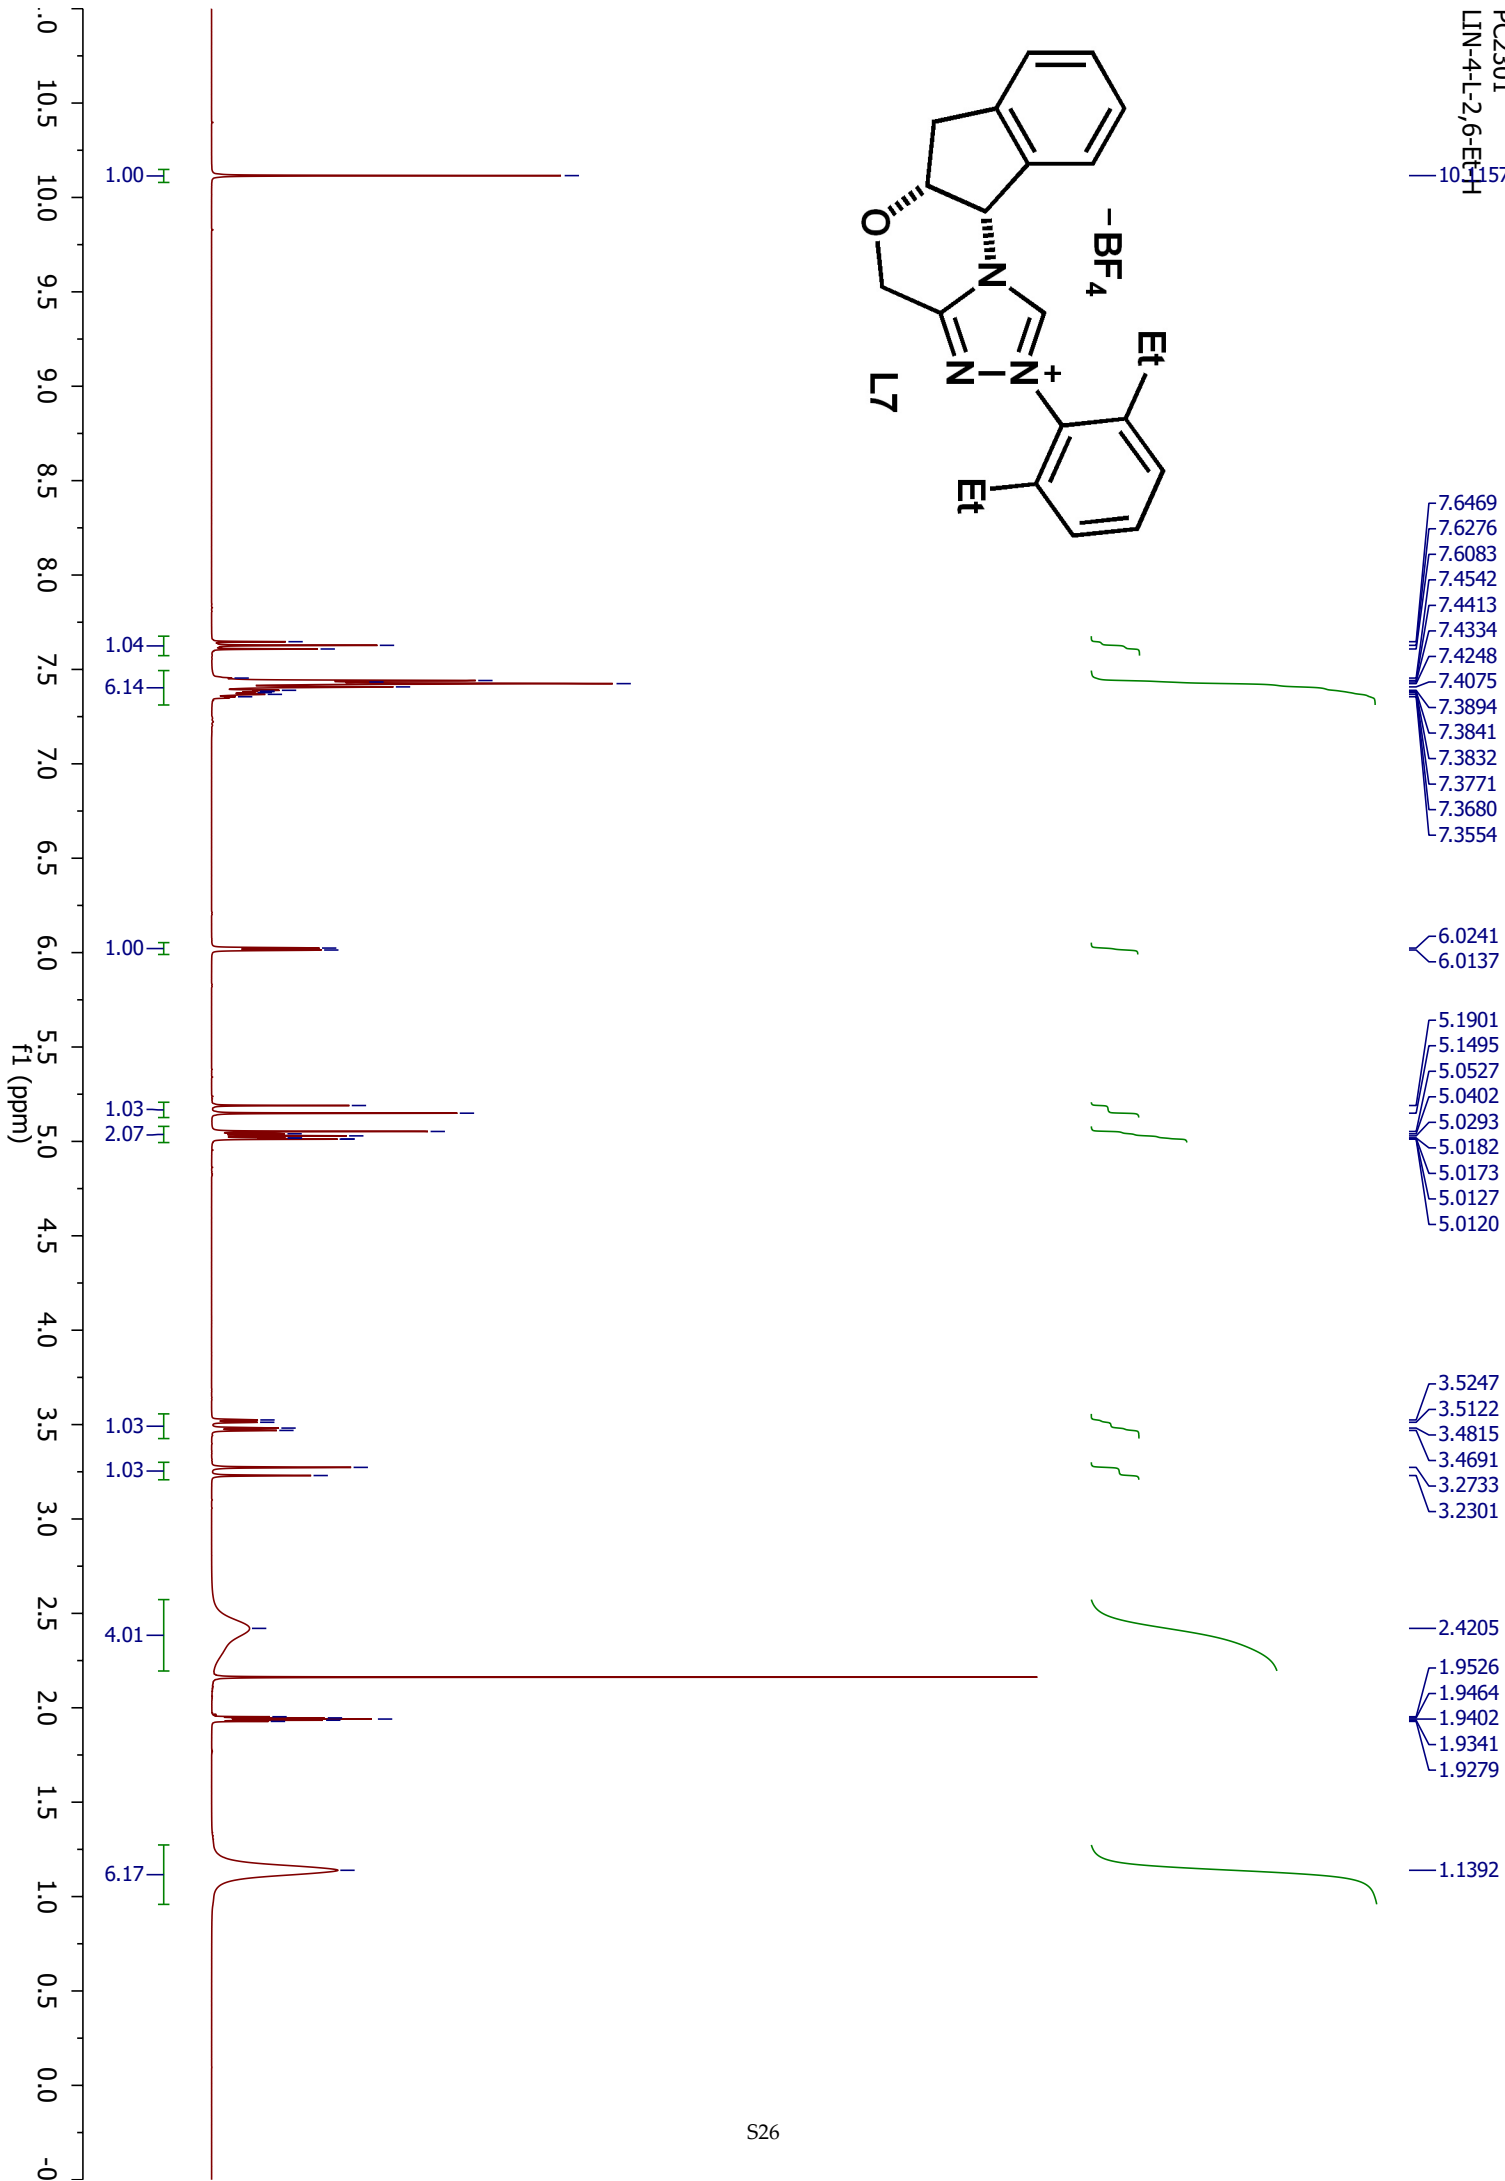

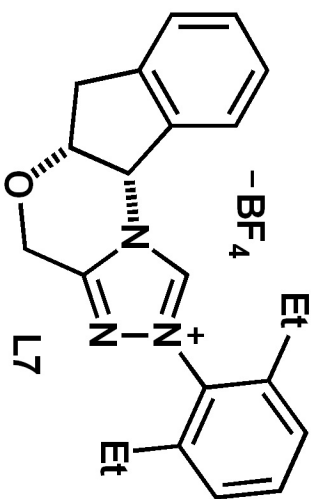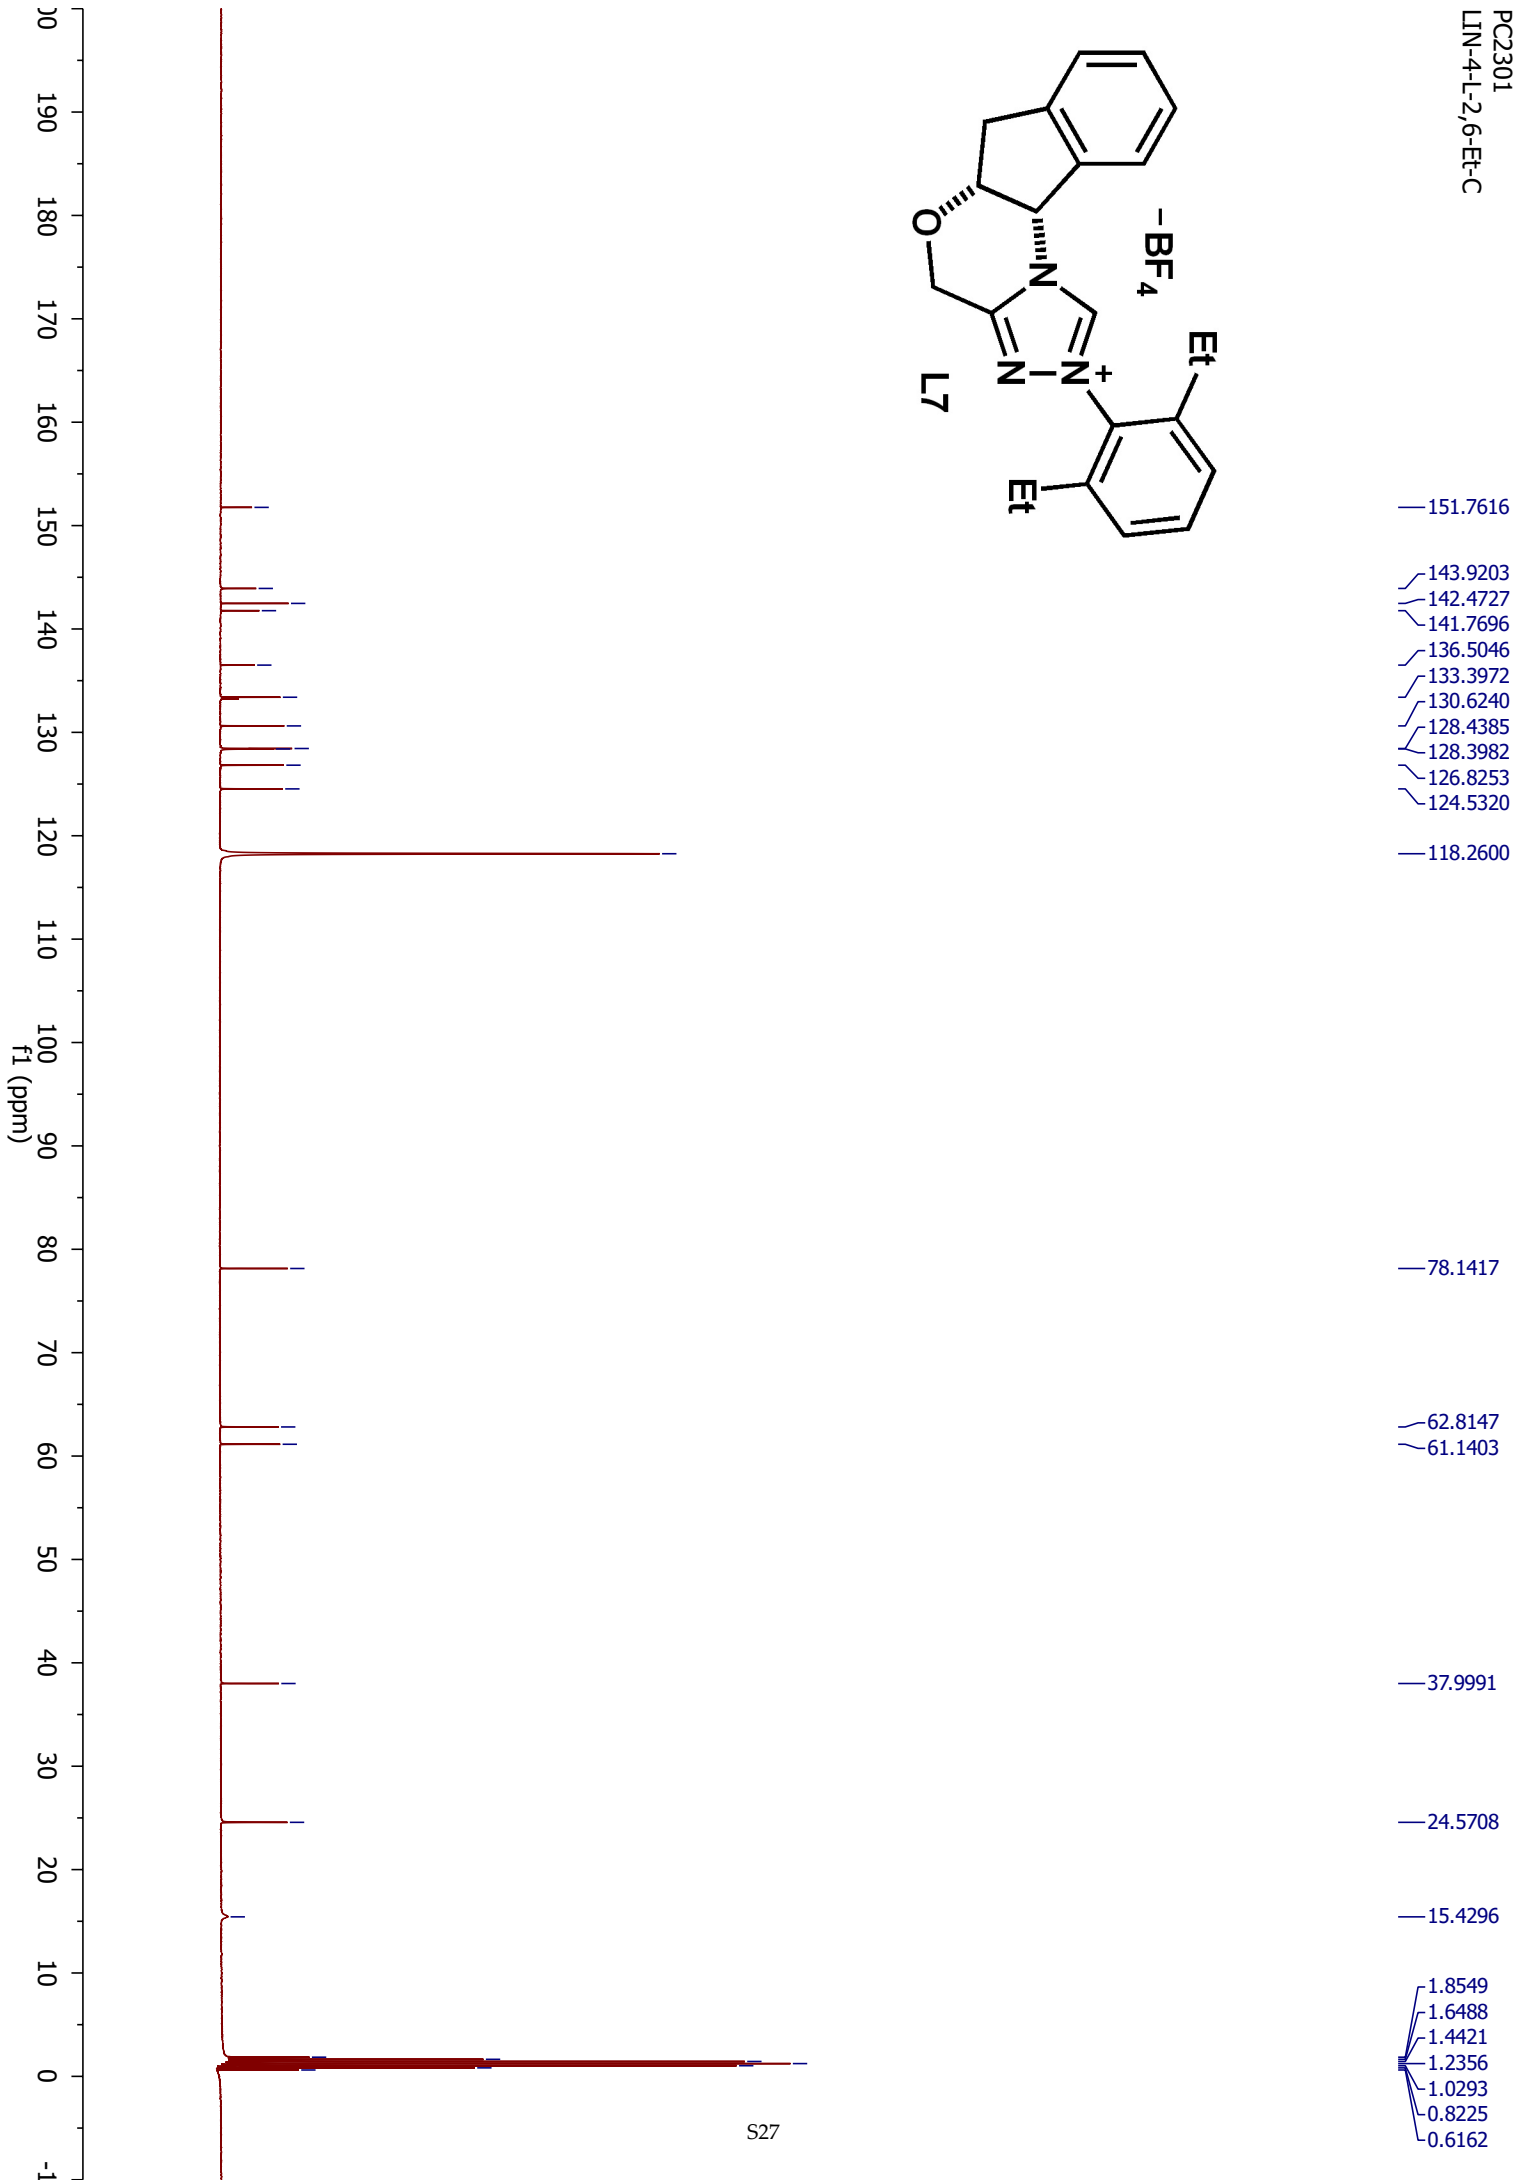

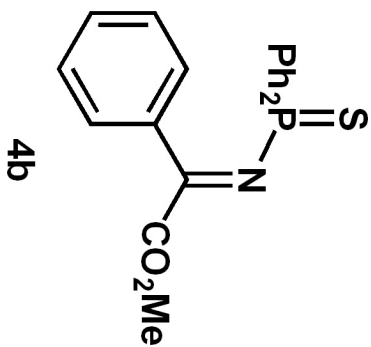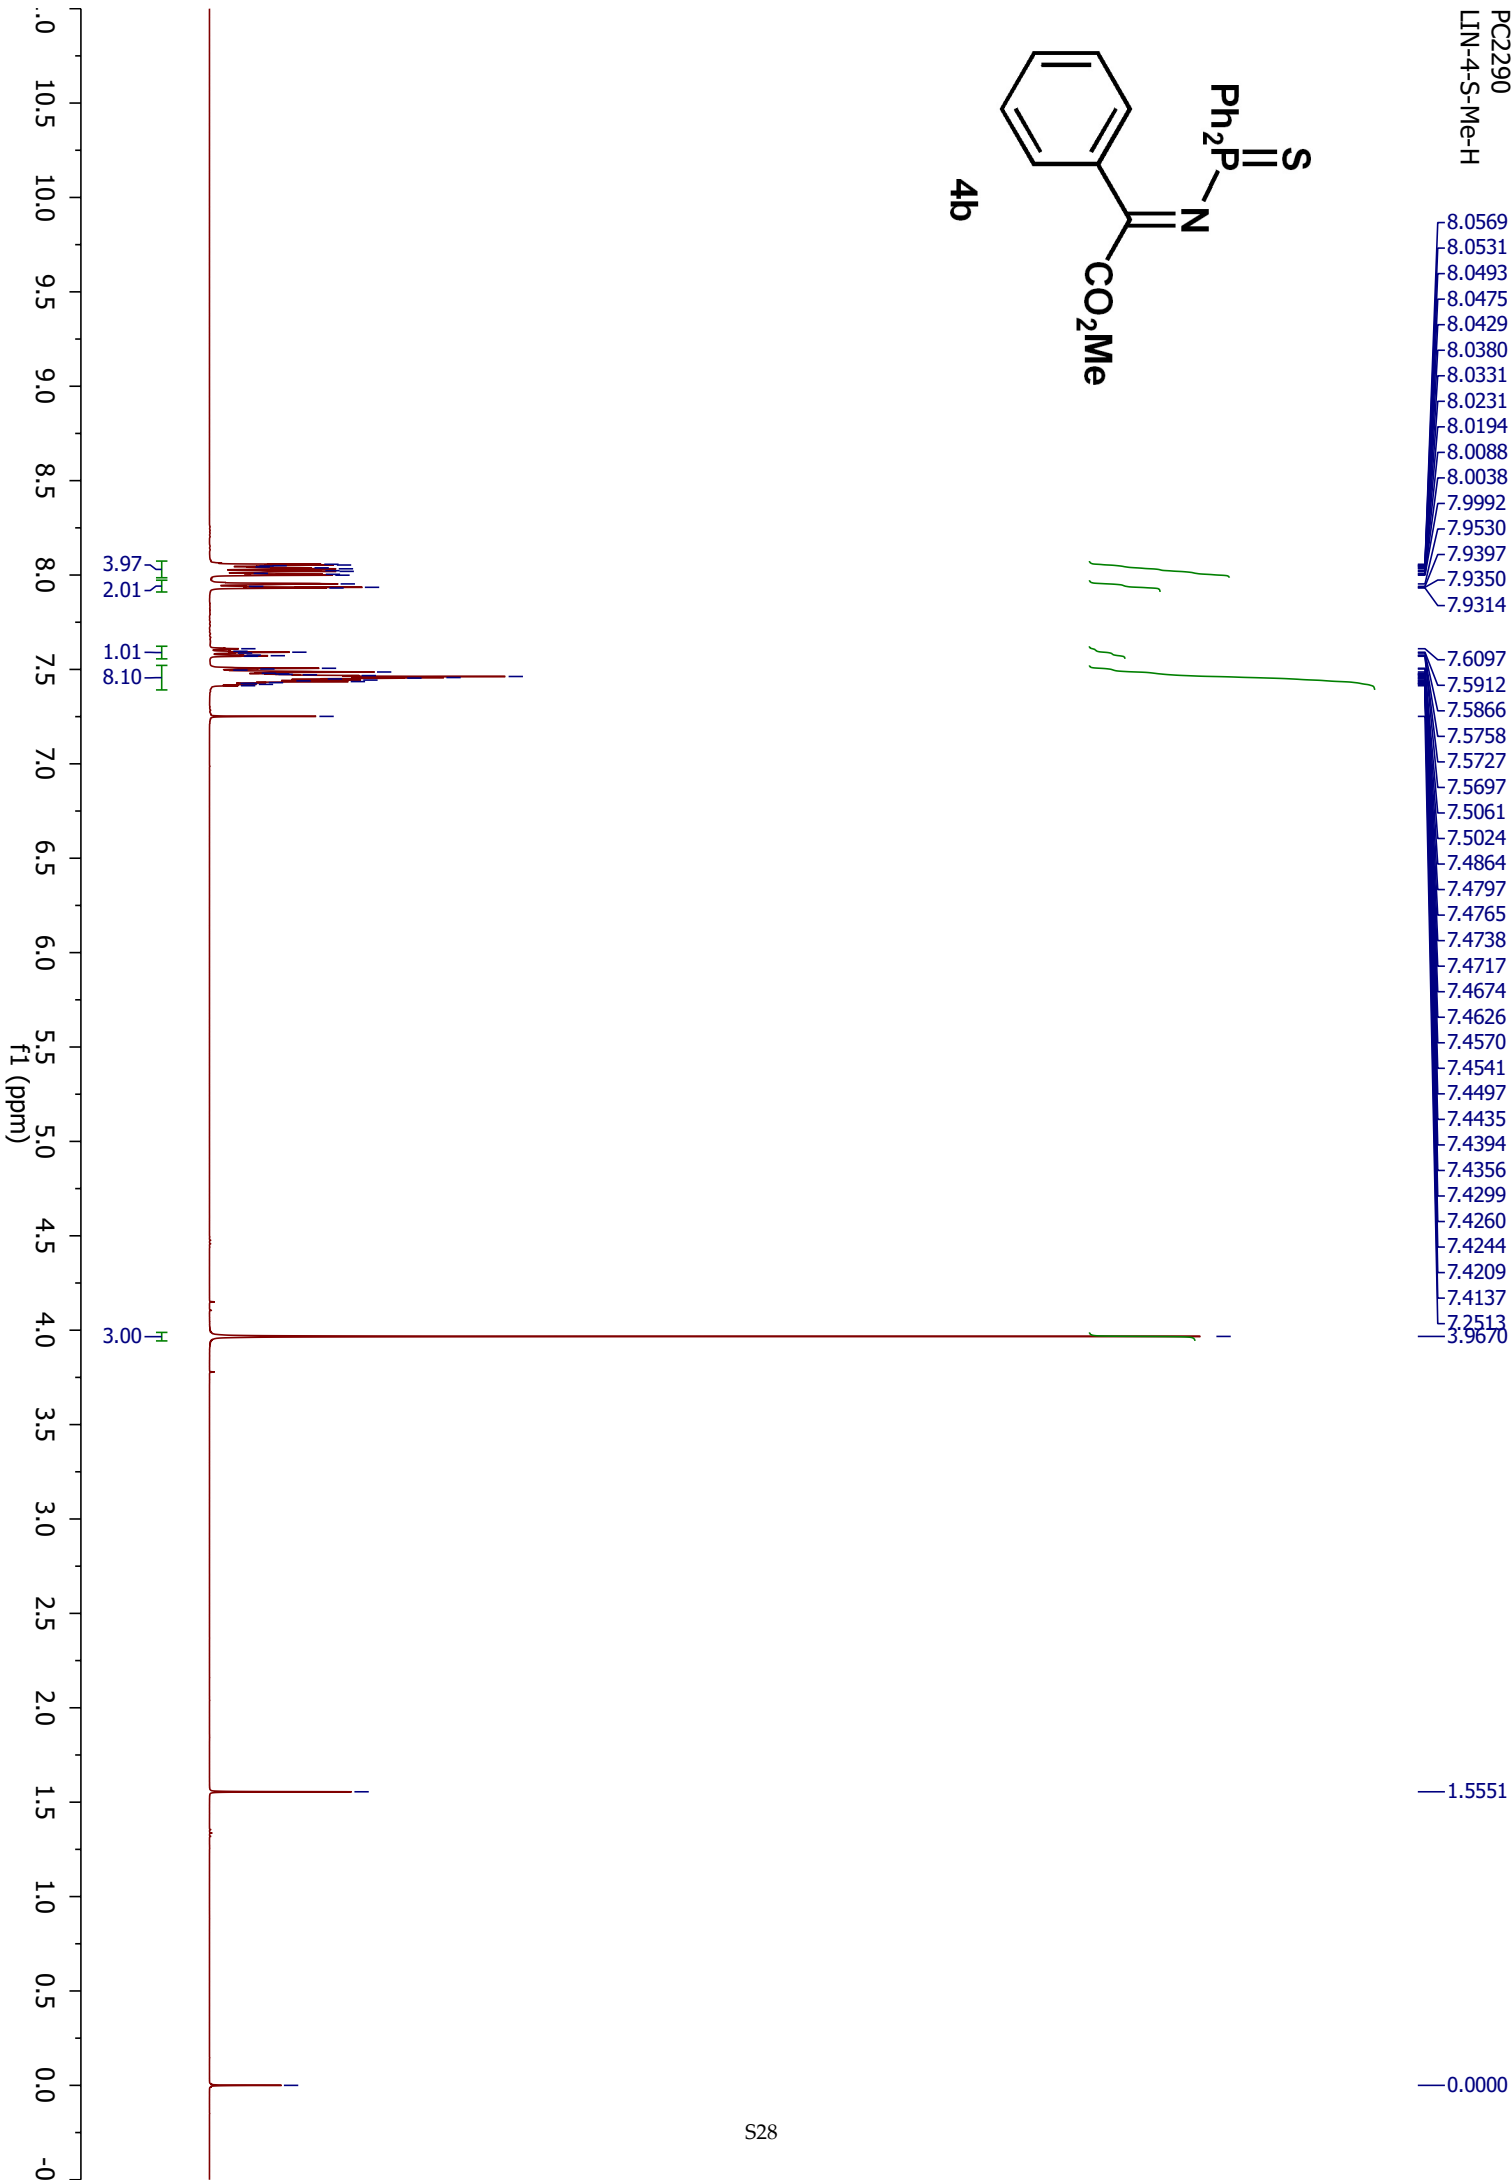

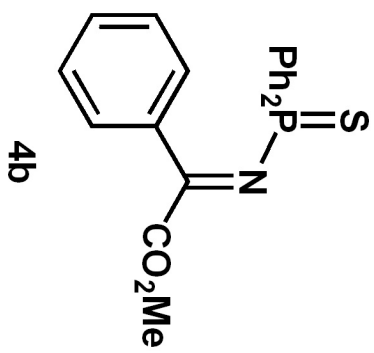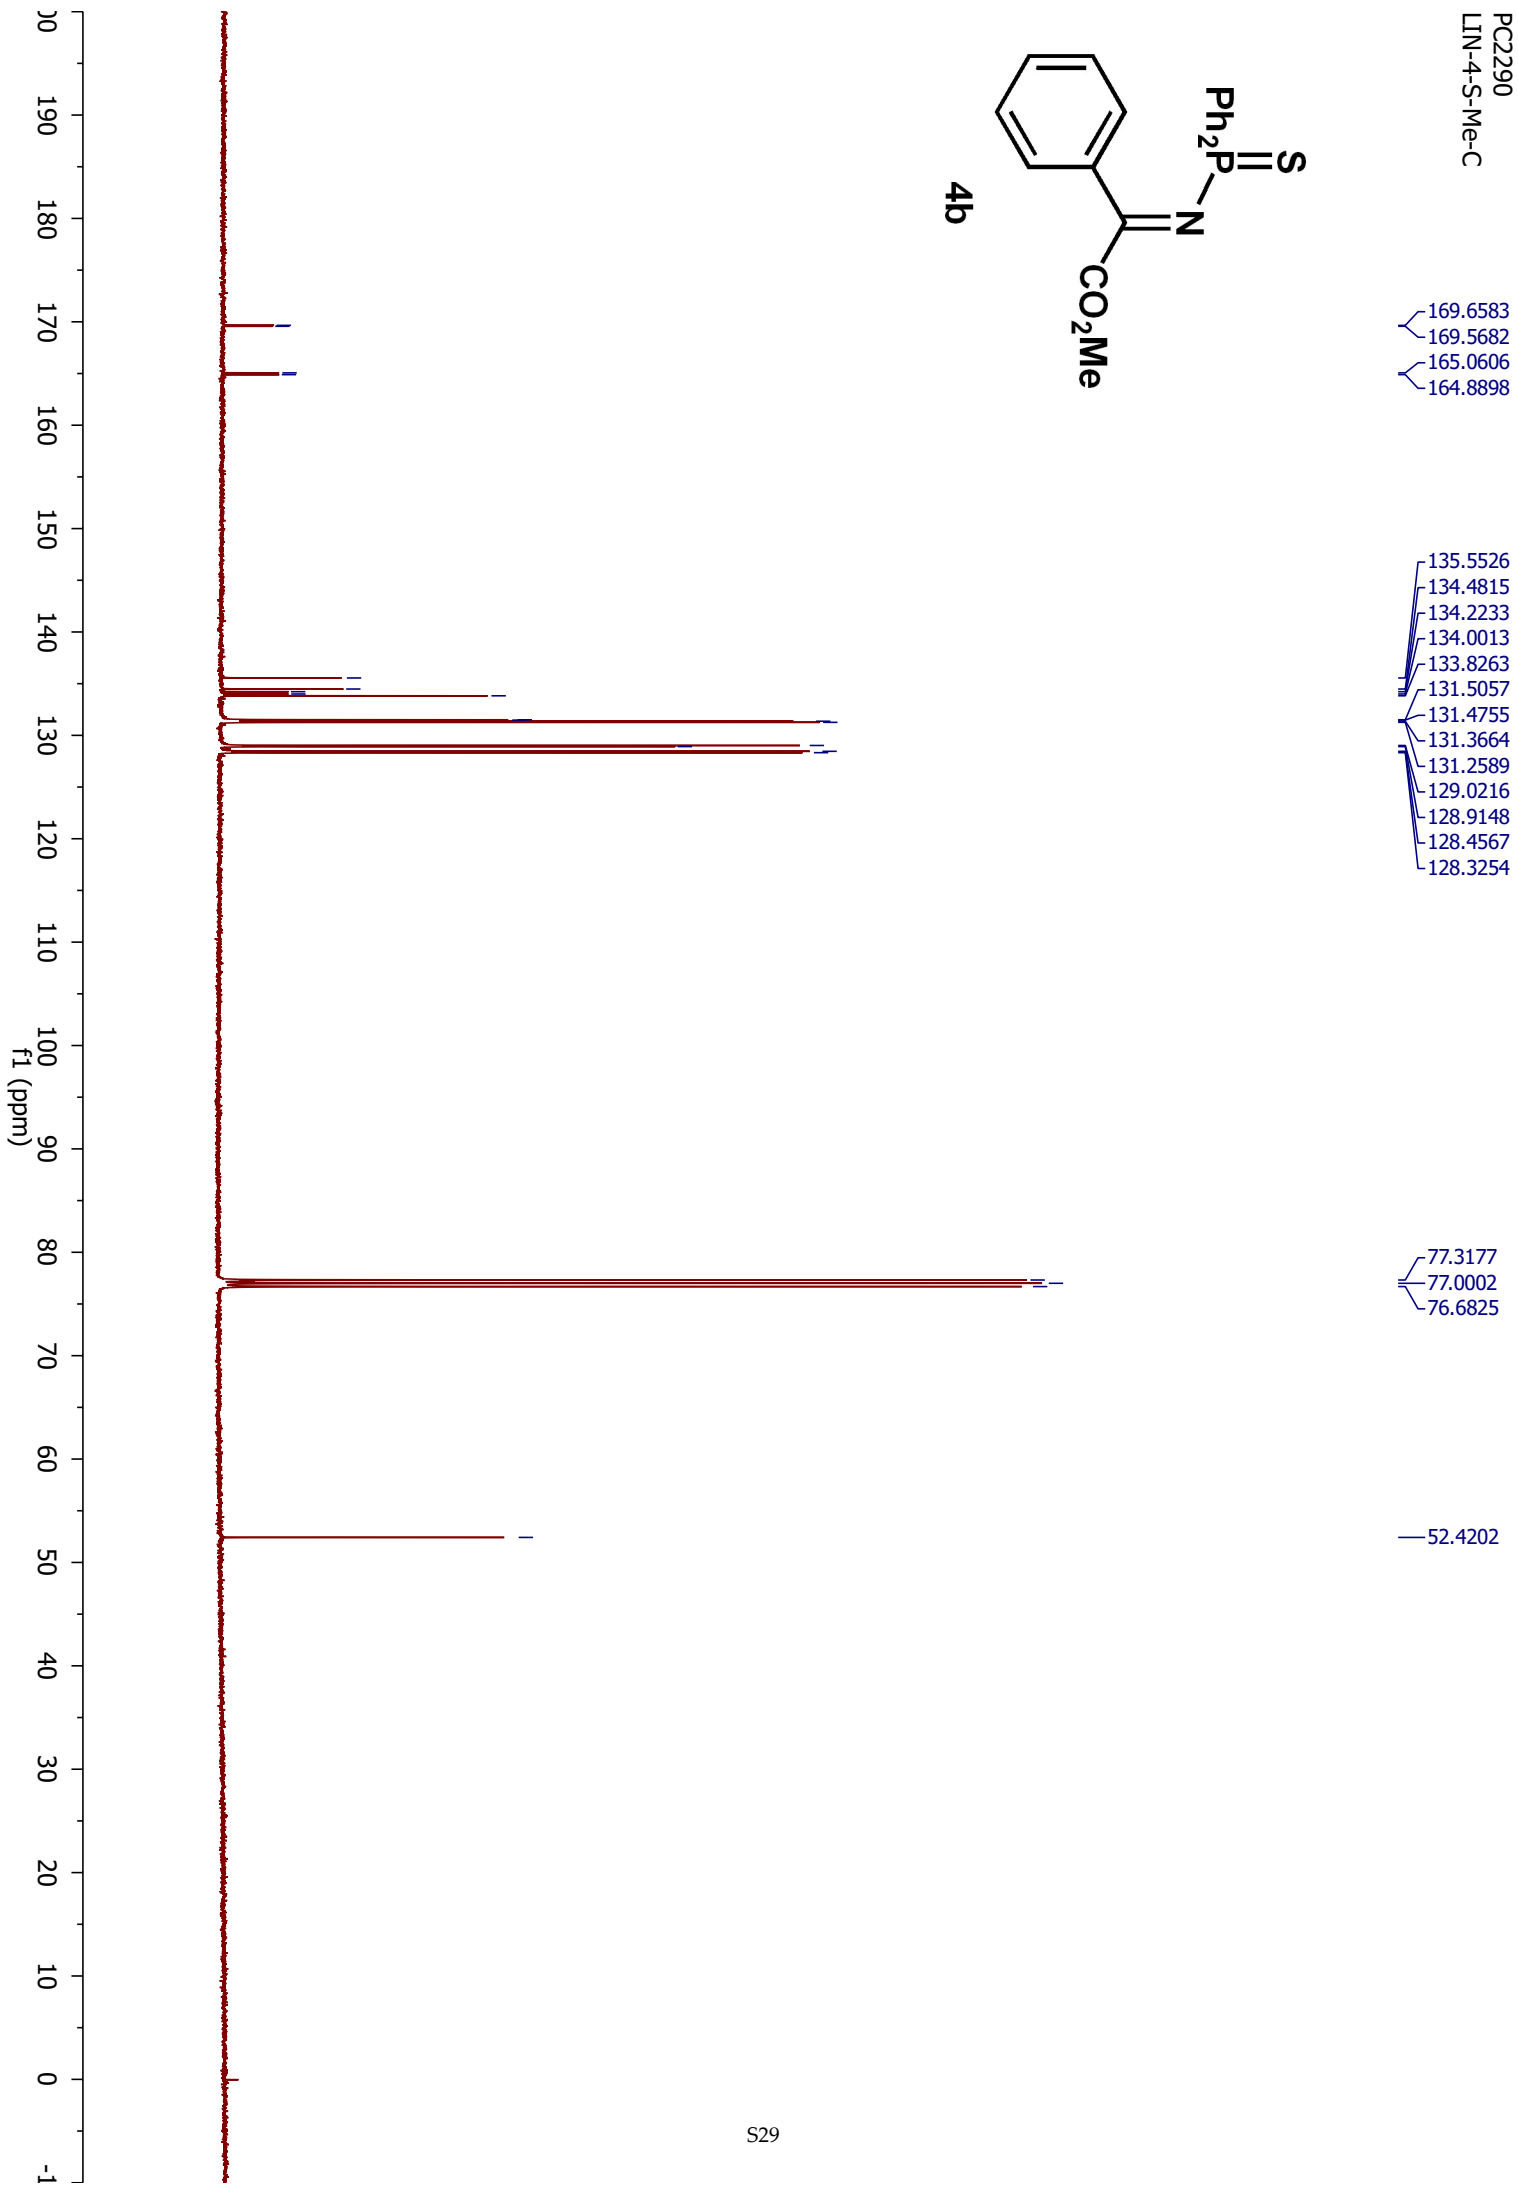

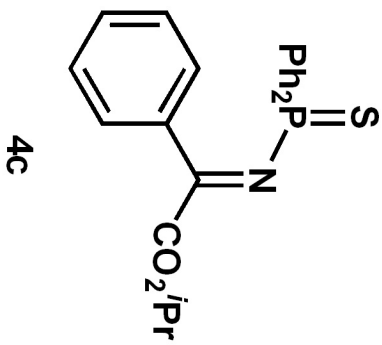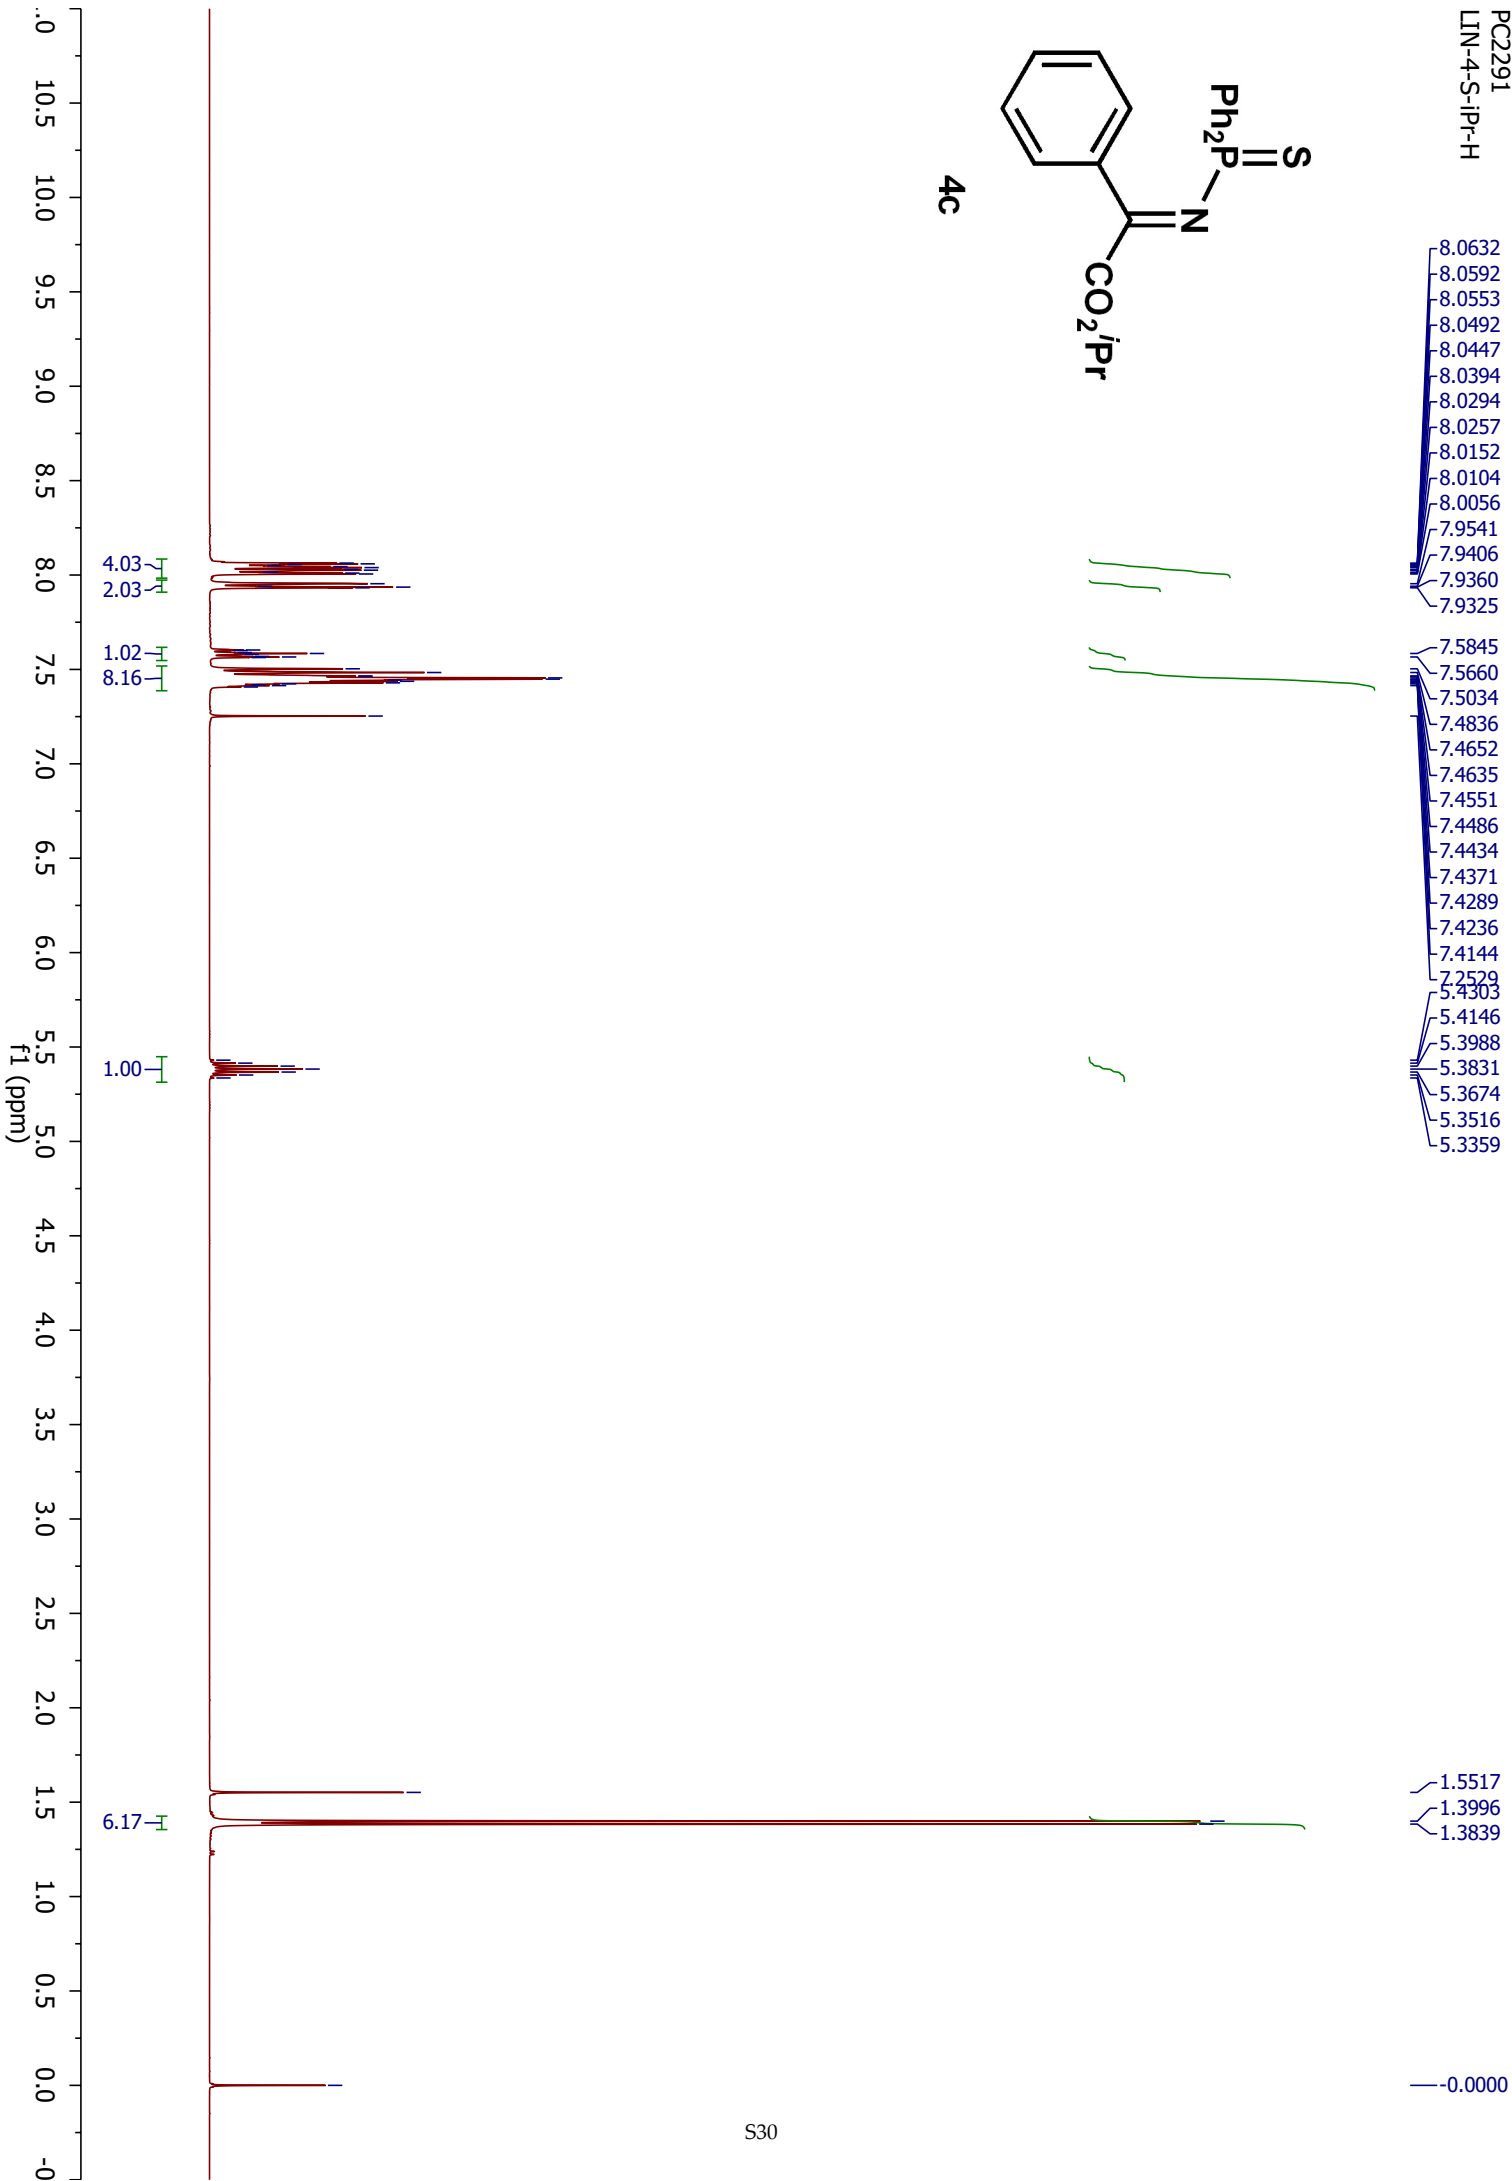

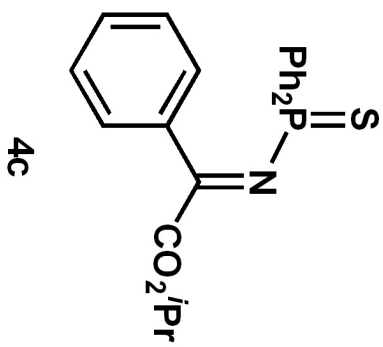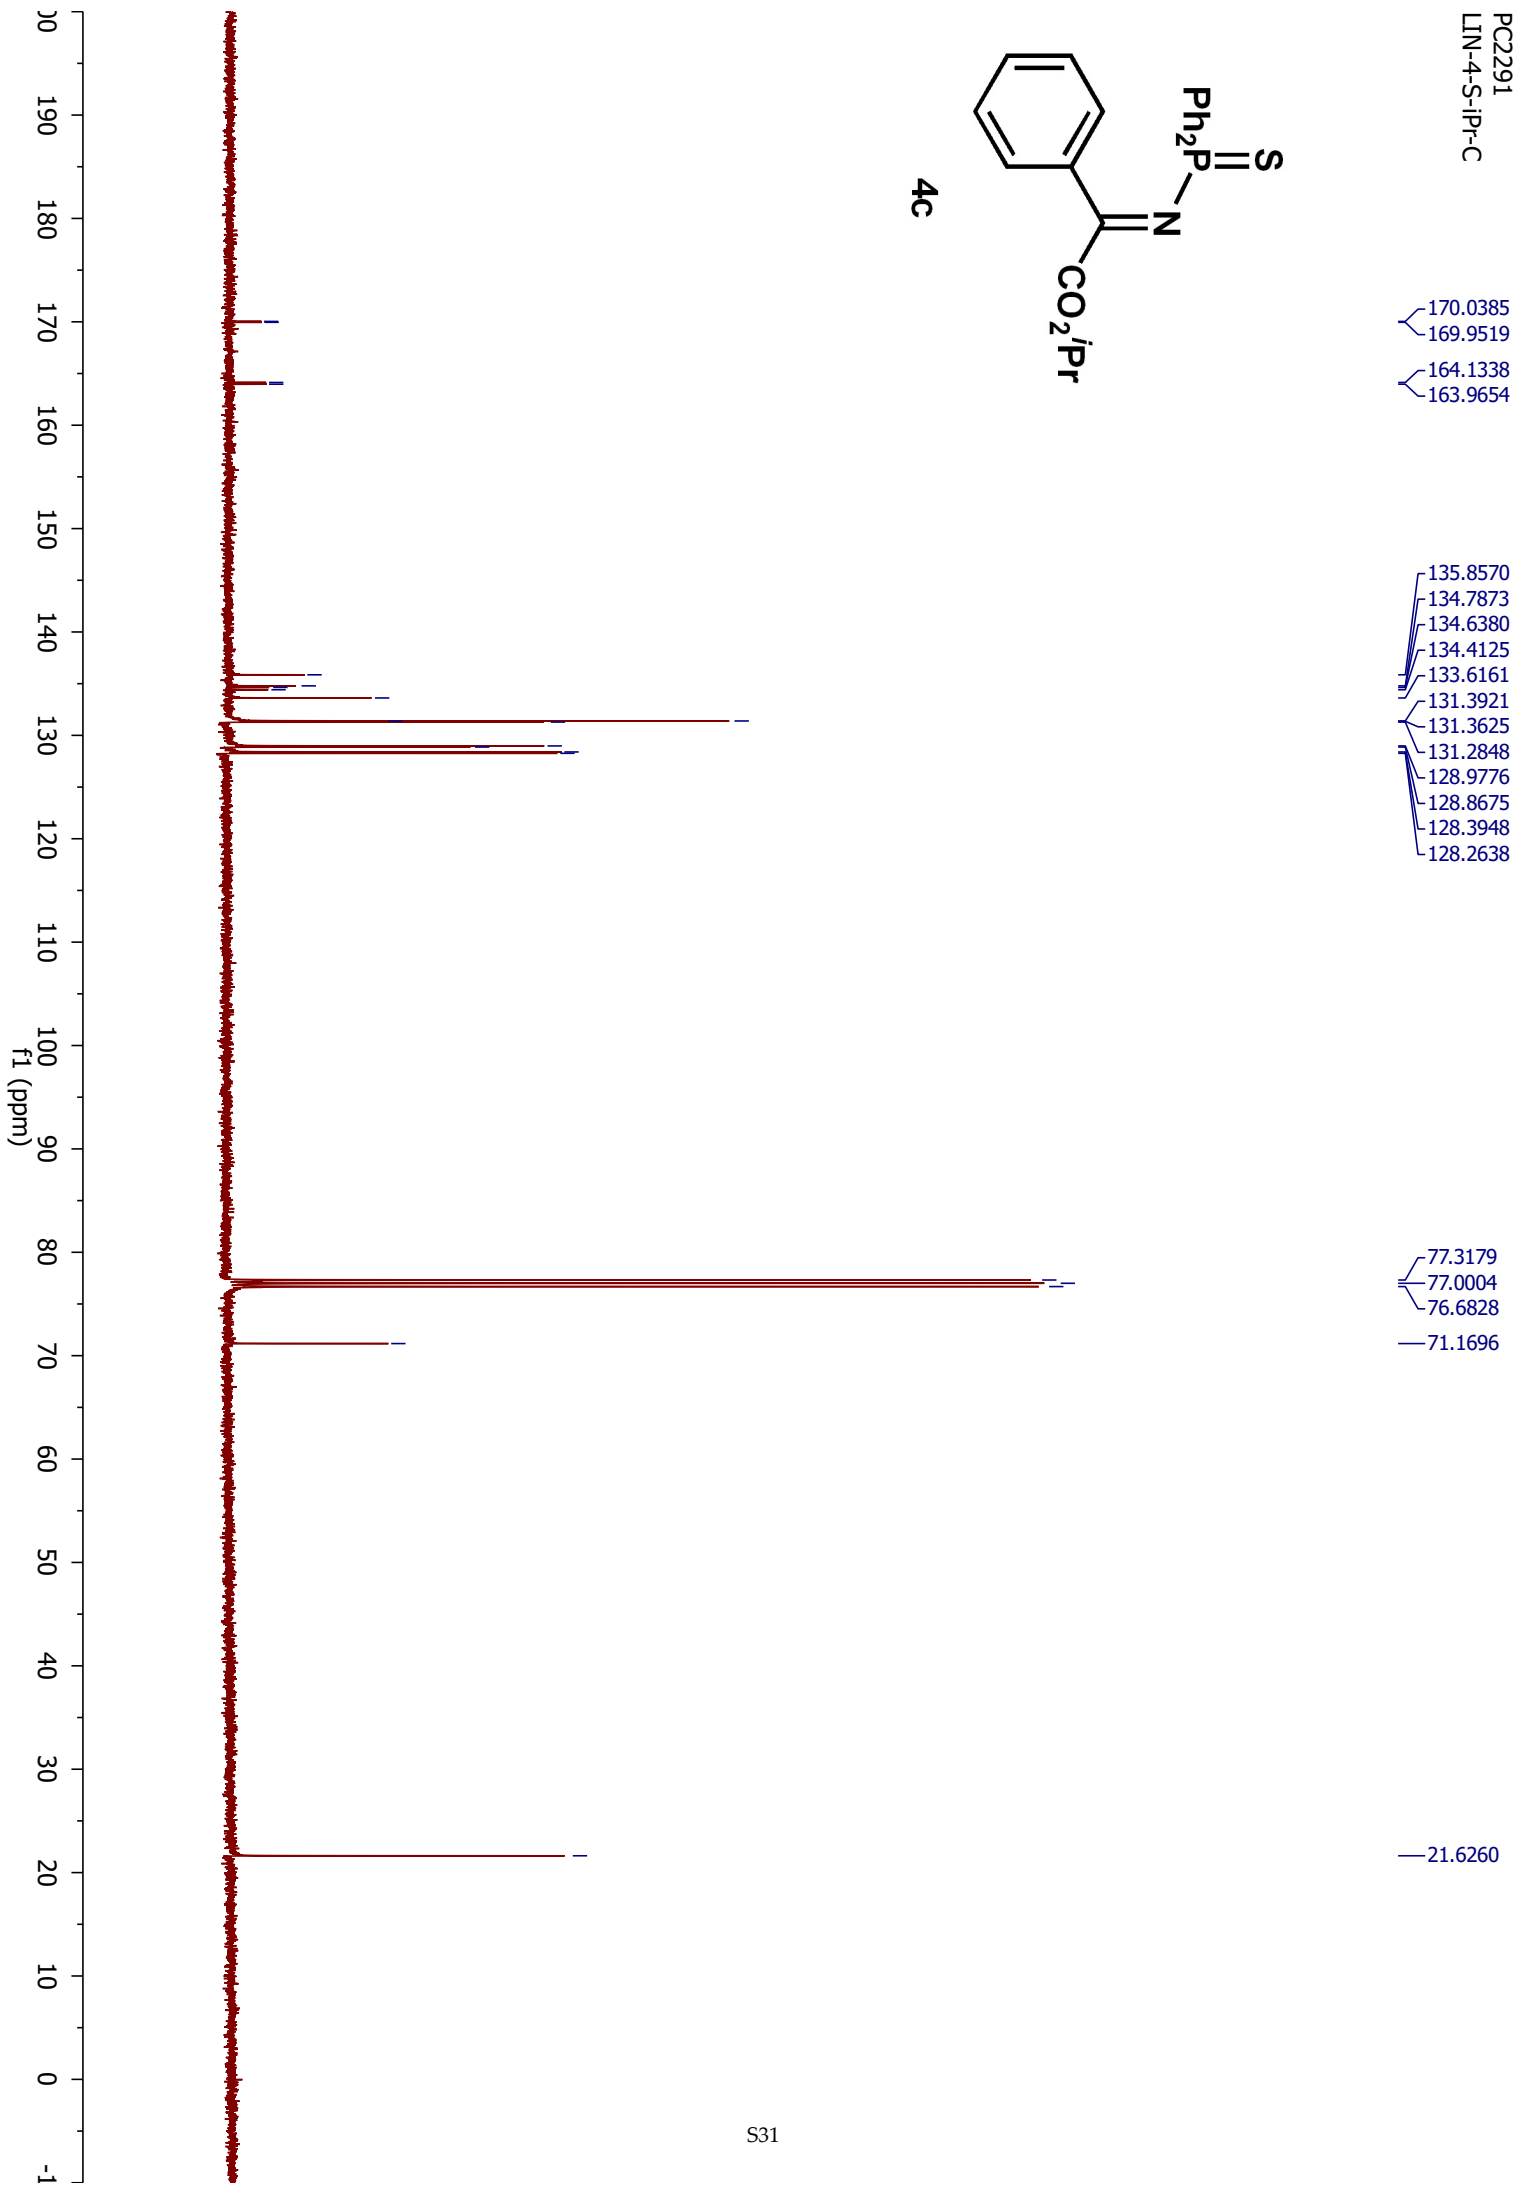

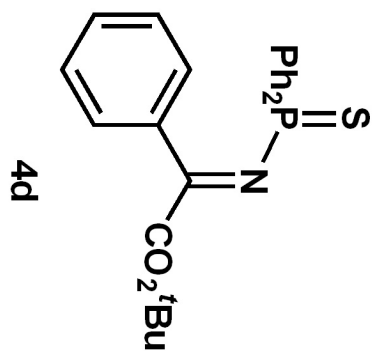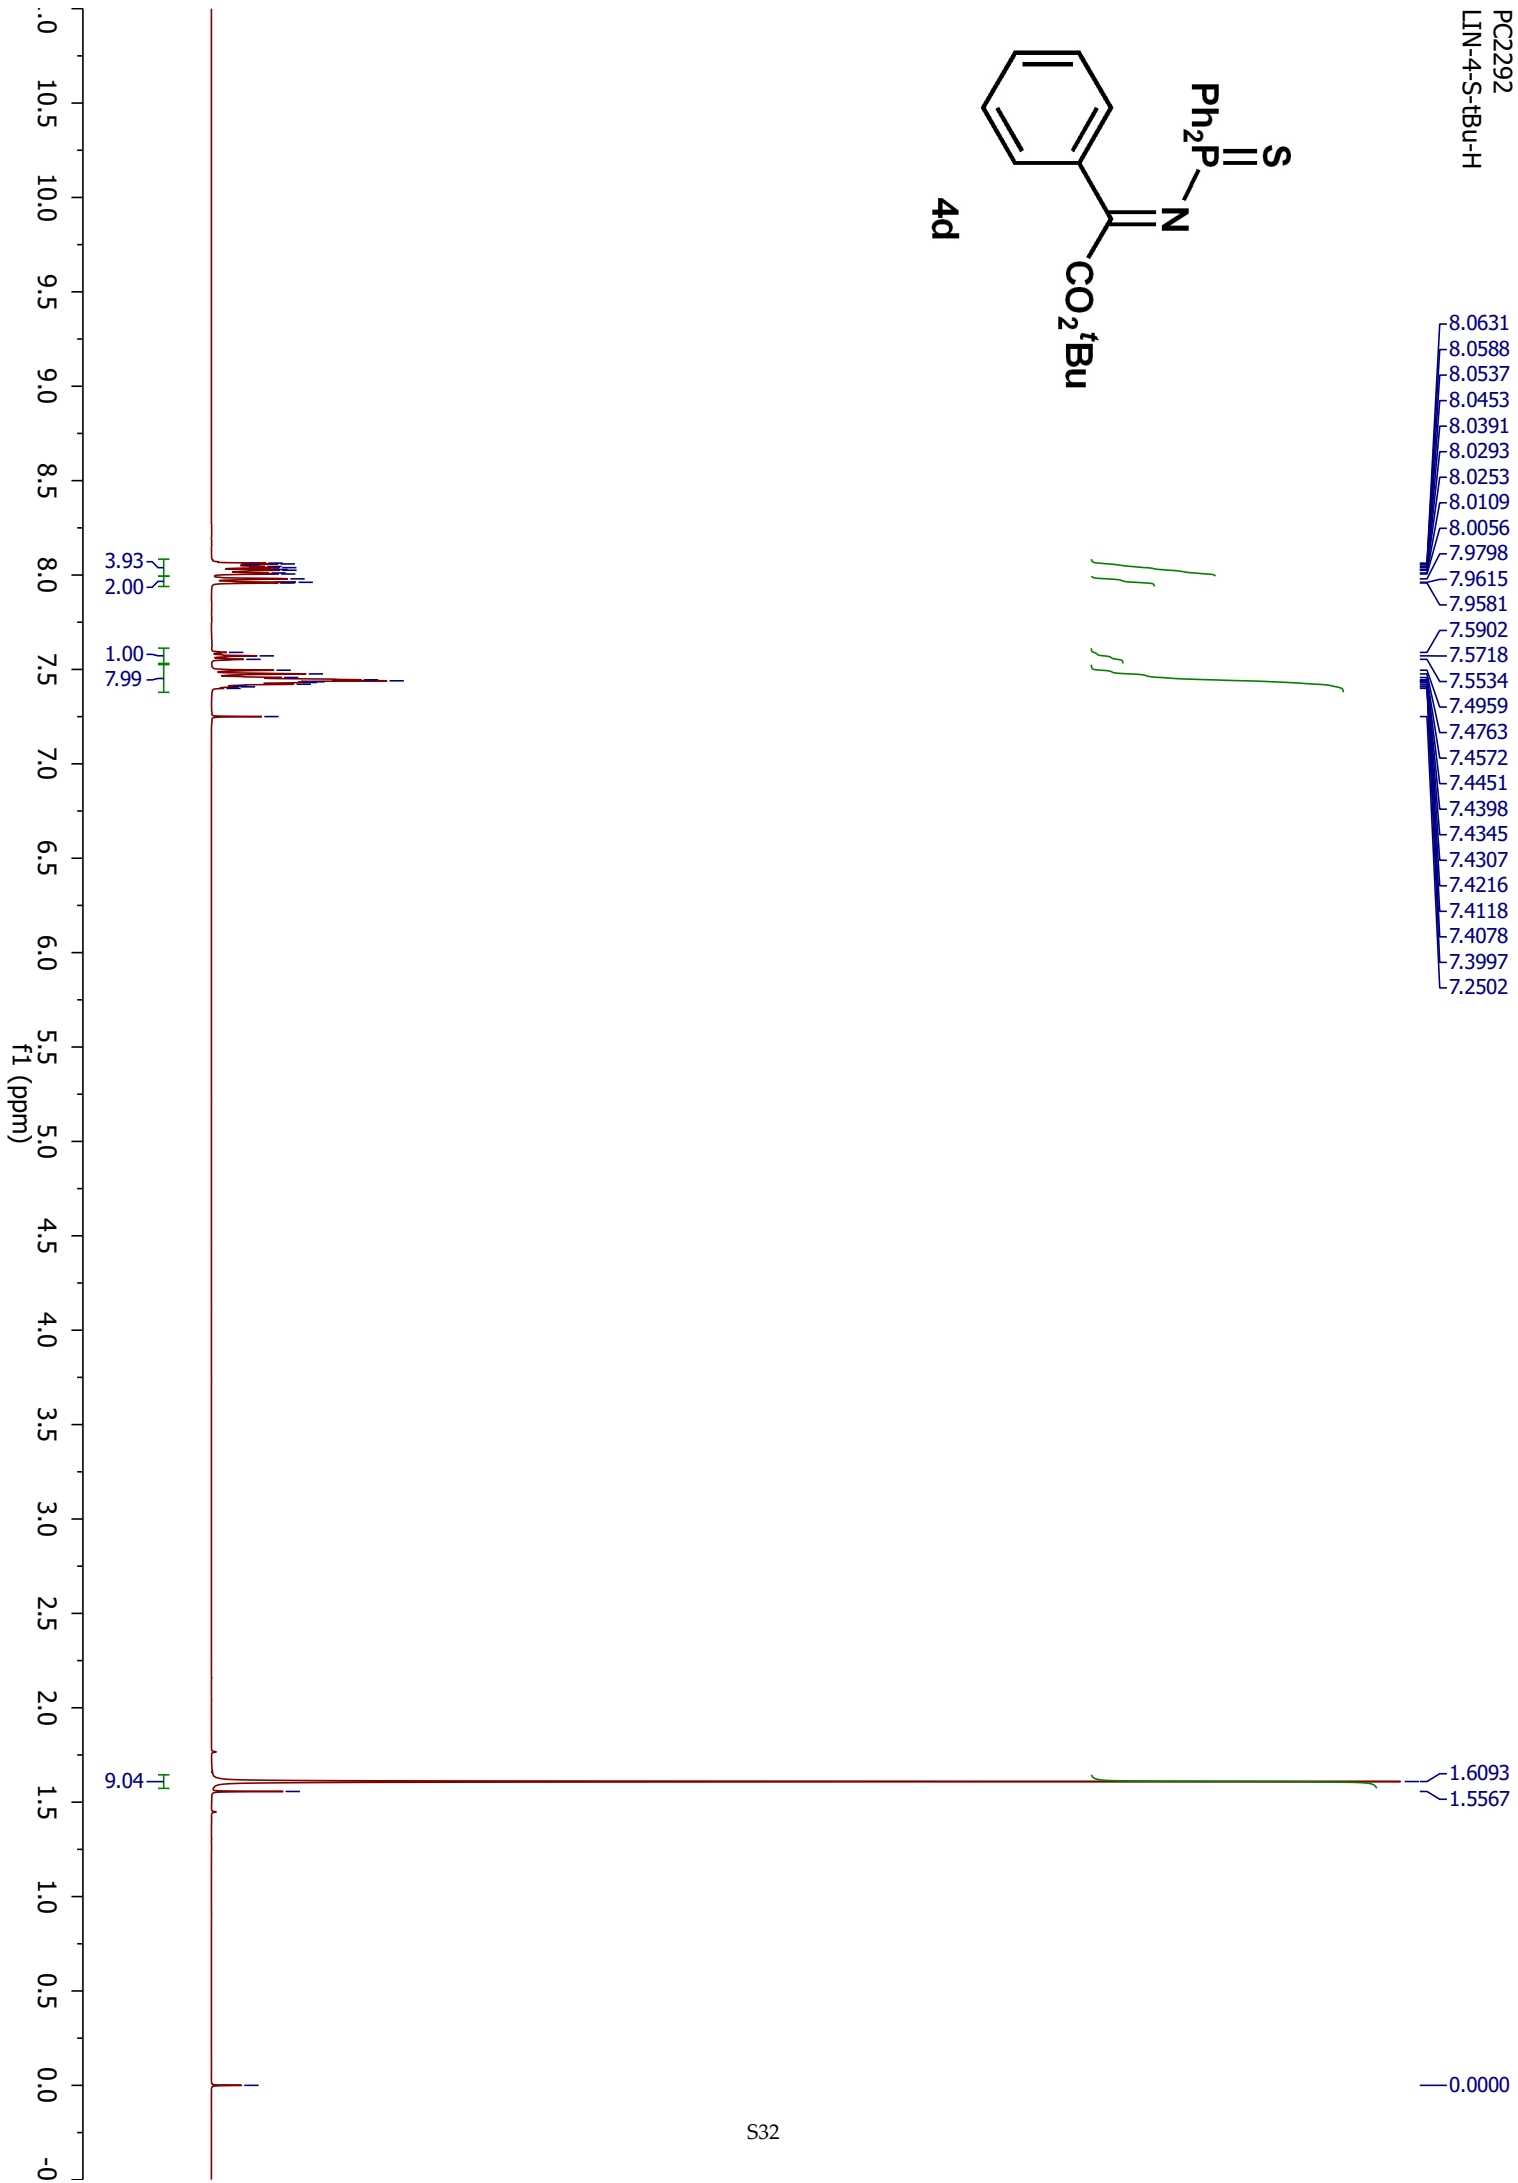



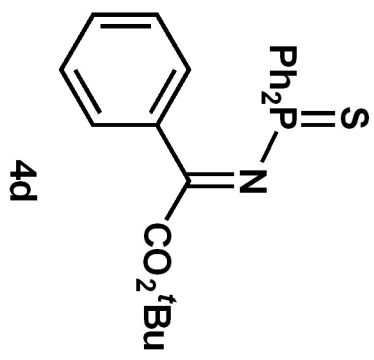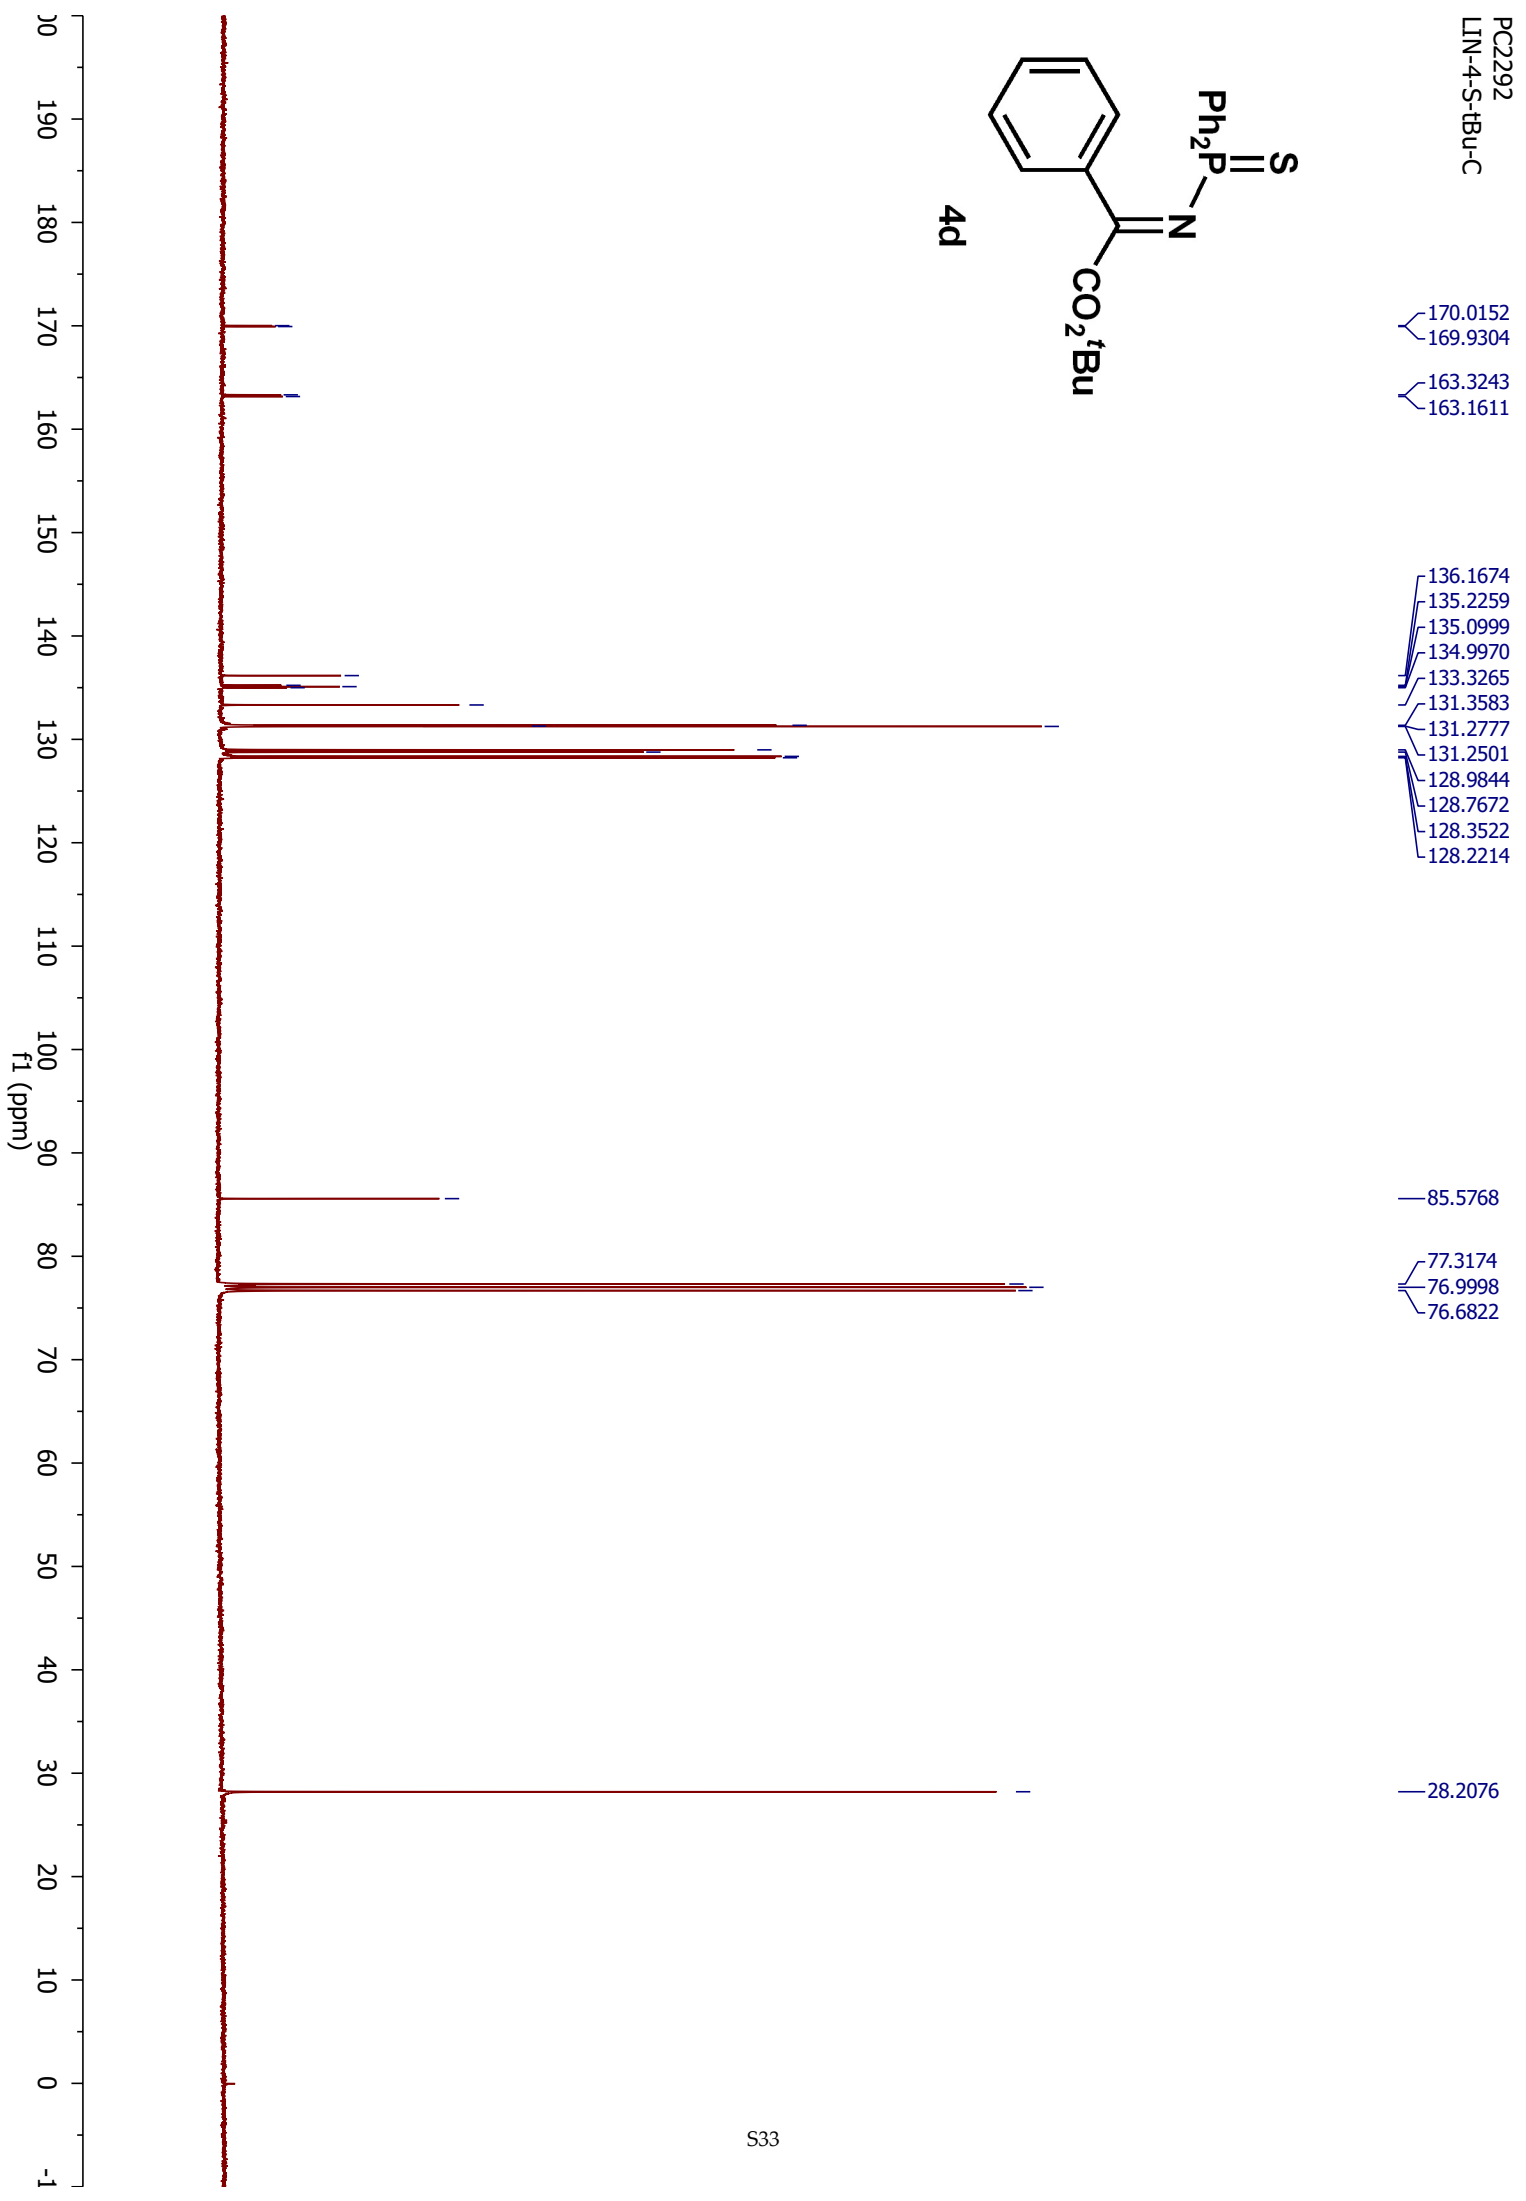

PC2299  
 LINES  
 8.0336  
 8.0299  
 8.0249  
 8.0229  
 8.0200  
 8.0153  
 8.0396  
 8.0298  
 8.0259  
 8.0222  
 8.0204  
 8.0159  
 8.0110  
 8.0060  
 7.9928  
 7.9747  
 7.9712  
 7.5909  
 7.5879  
 7.5849  
 7.5748  
 7.5695  
 7.5647  
 7.5542  
 7.5511  
 7.5480  
 7.4956  
 7.4759  
 7.4621  
 7.4577  
 7.4554  
 7.4488  
 7.4463  
 7.4407  
 7.4353  
 7.4311  
 7.4266  
 7.4219  
 7.4176  
 7.4123  
 7.4083  
 7.4046  
 7.4003  
 7.2528

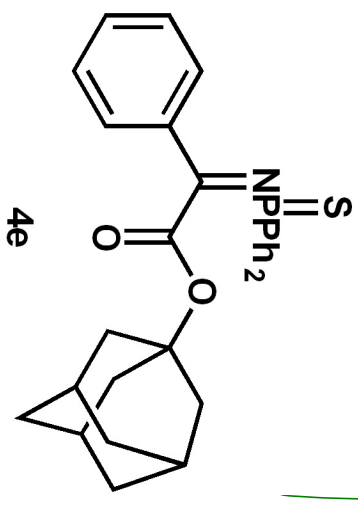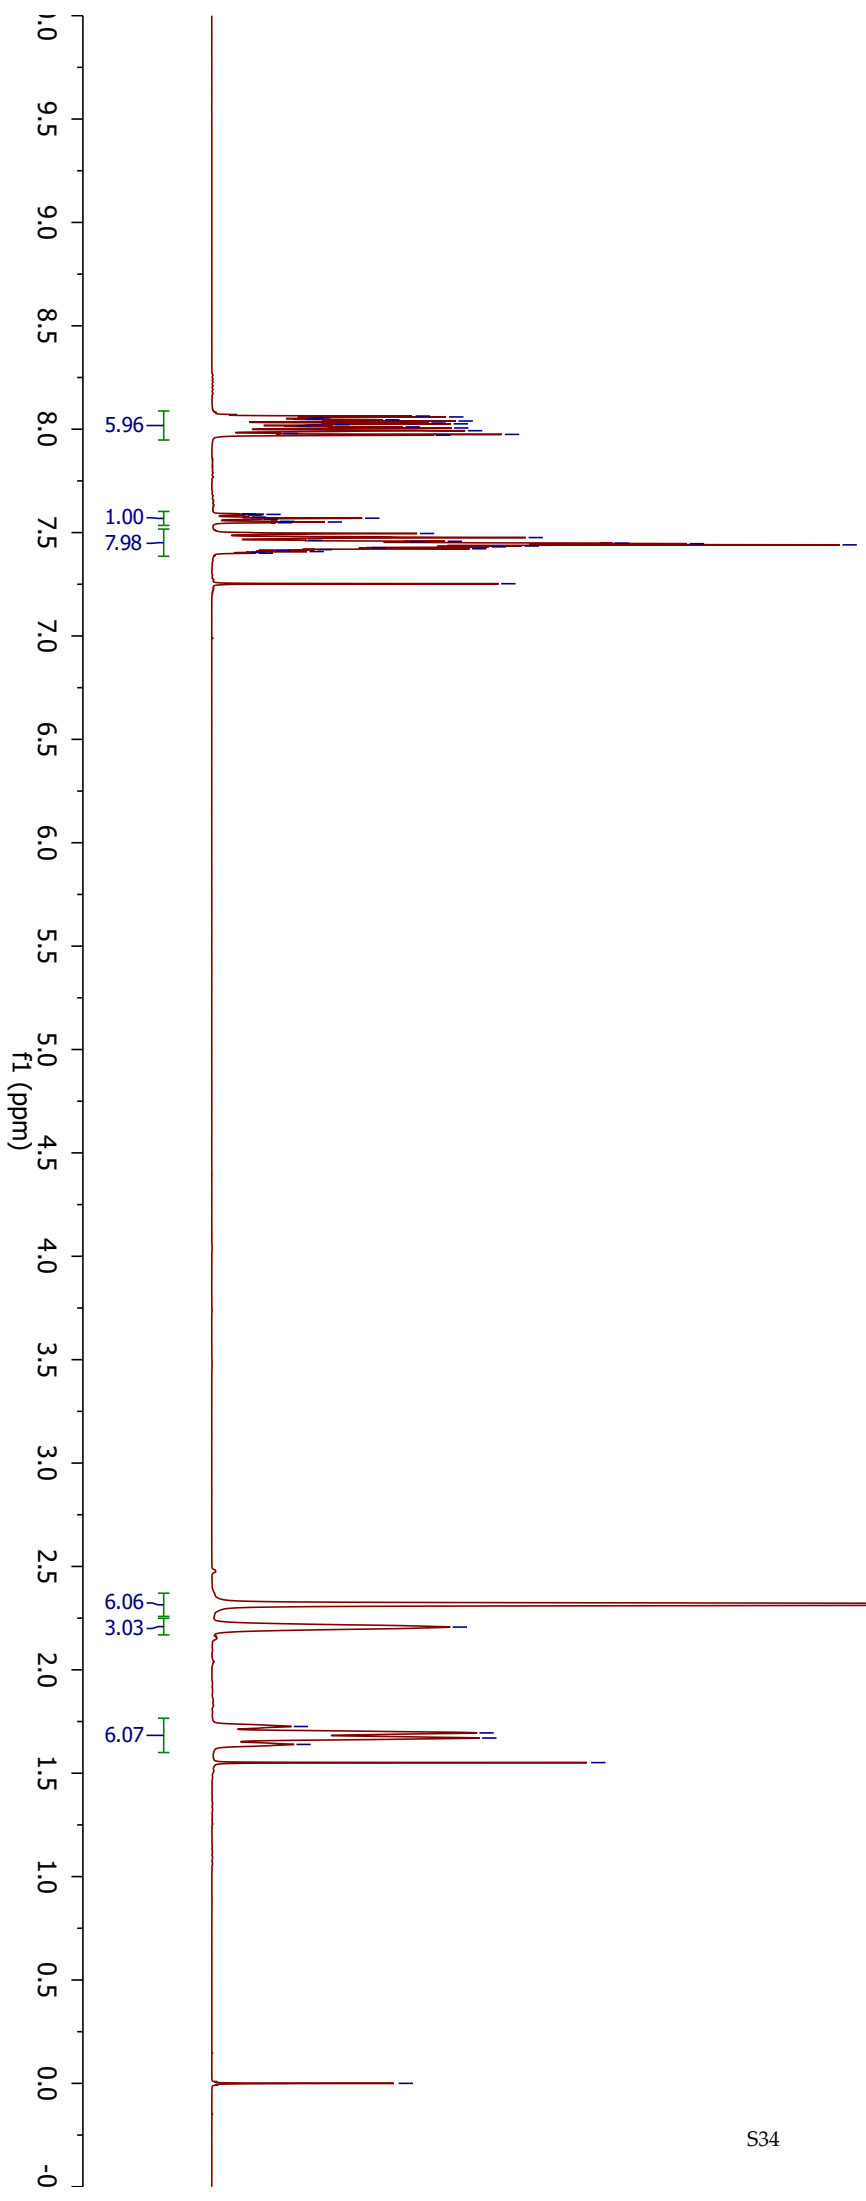

2.3204  
 2.3137  
 2.2067  
 1.7259  
 1.6950  
 1.6702  
 1.6392  
 1.5513

-0.0000

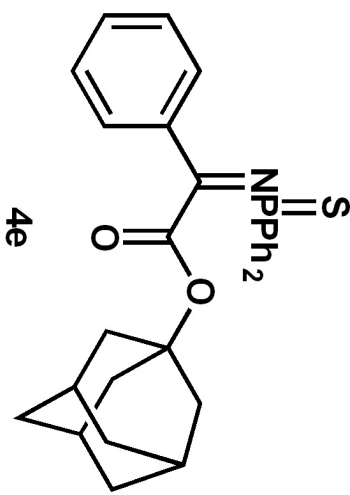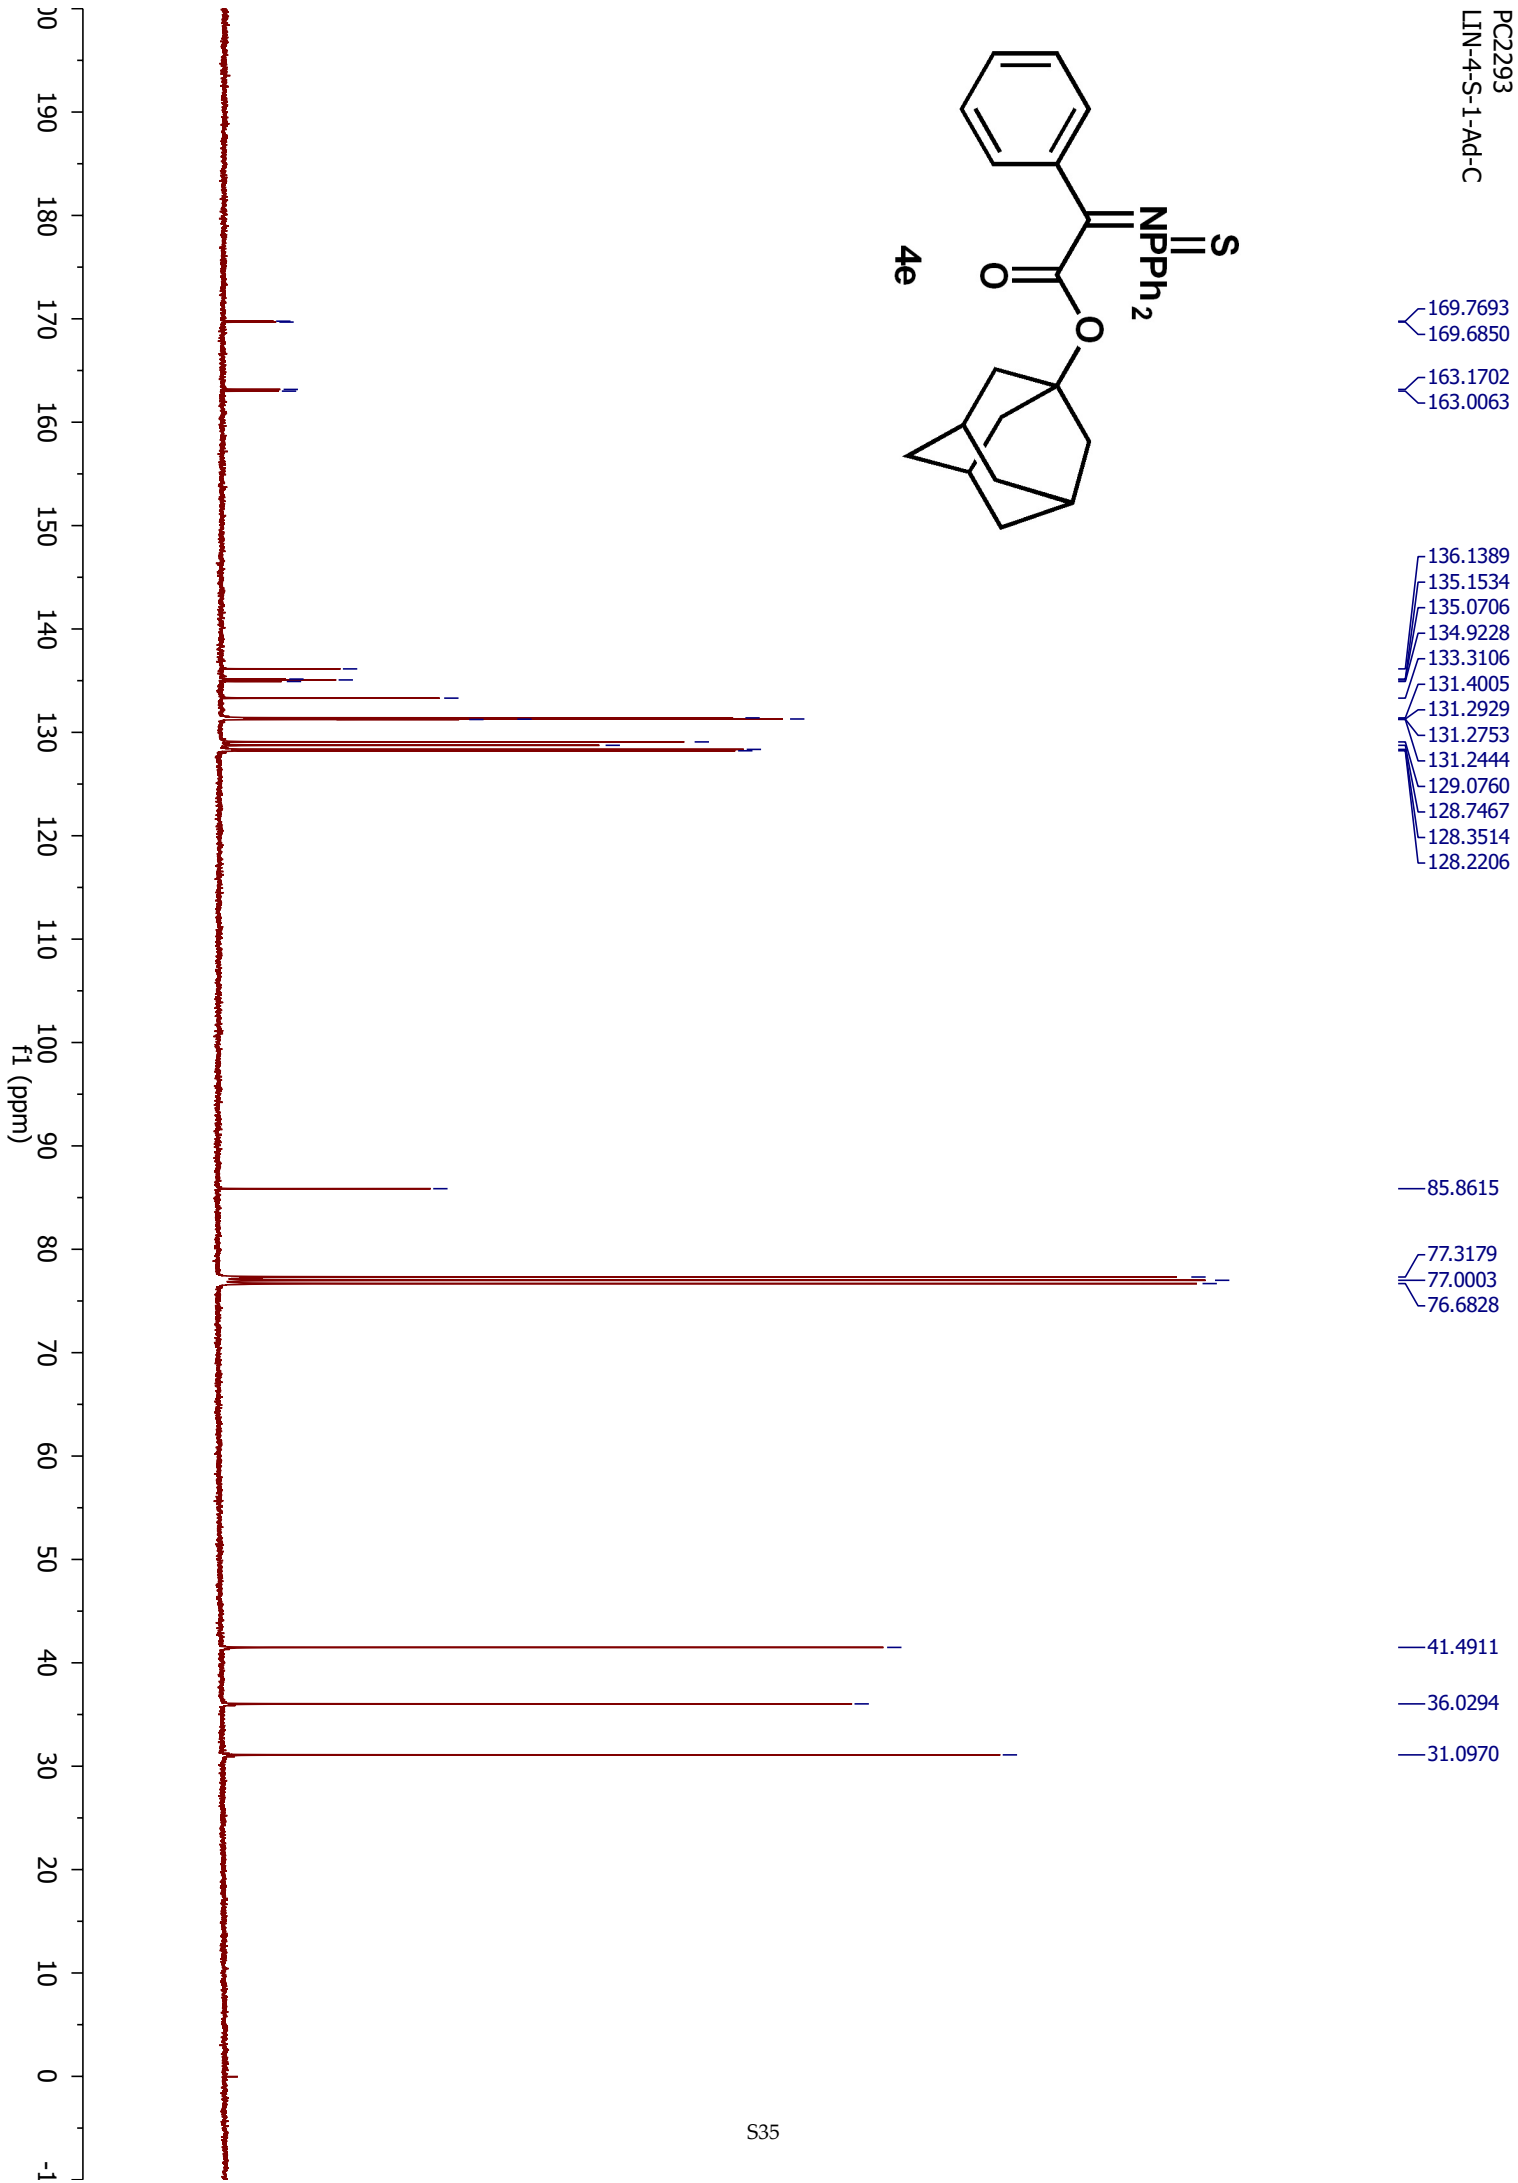

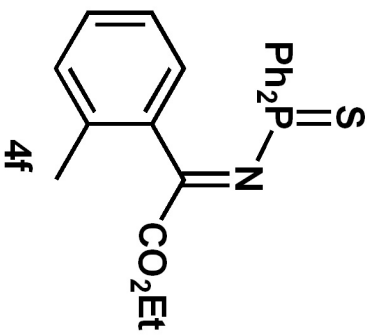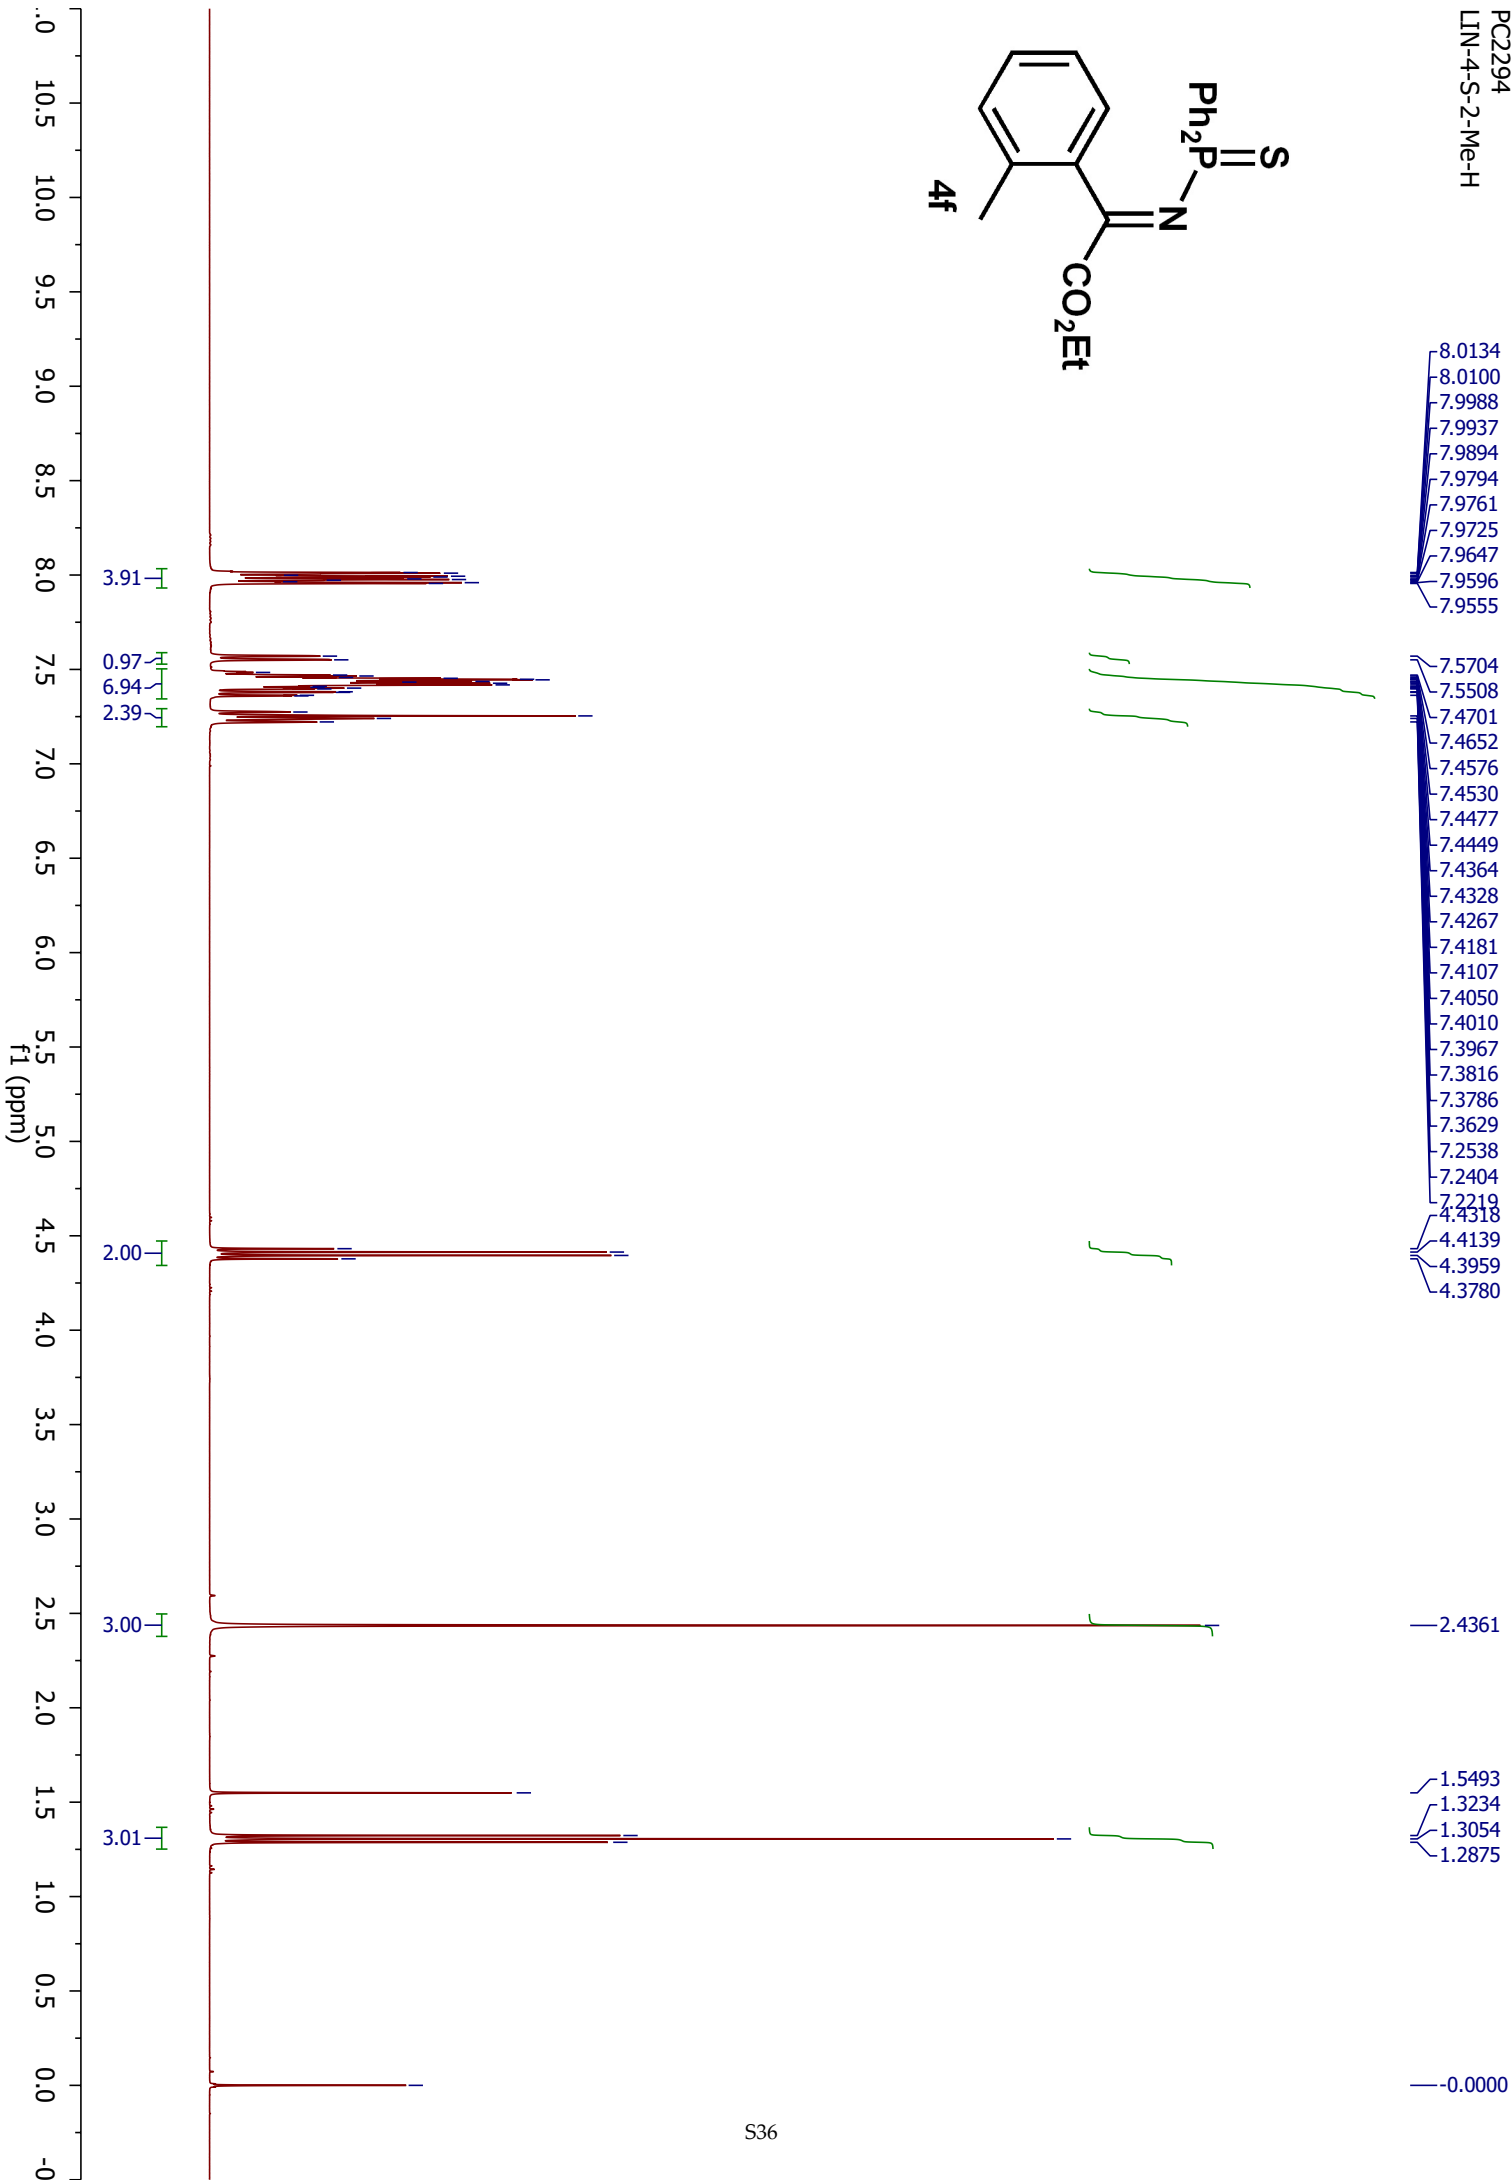

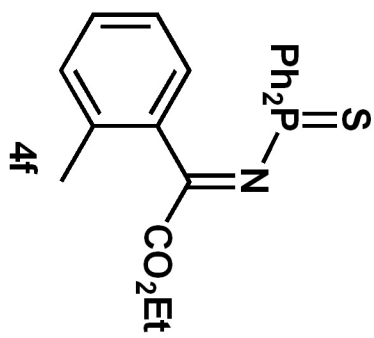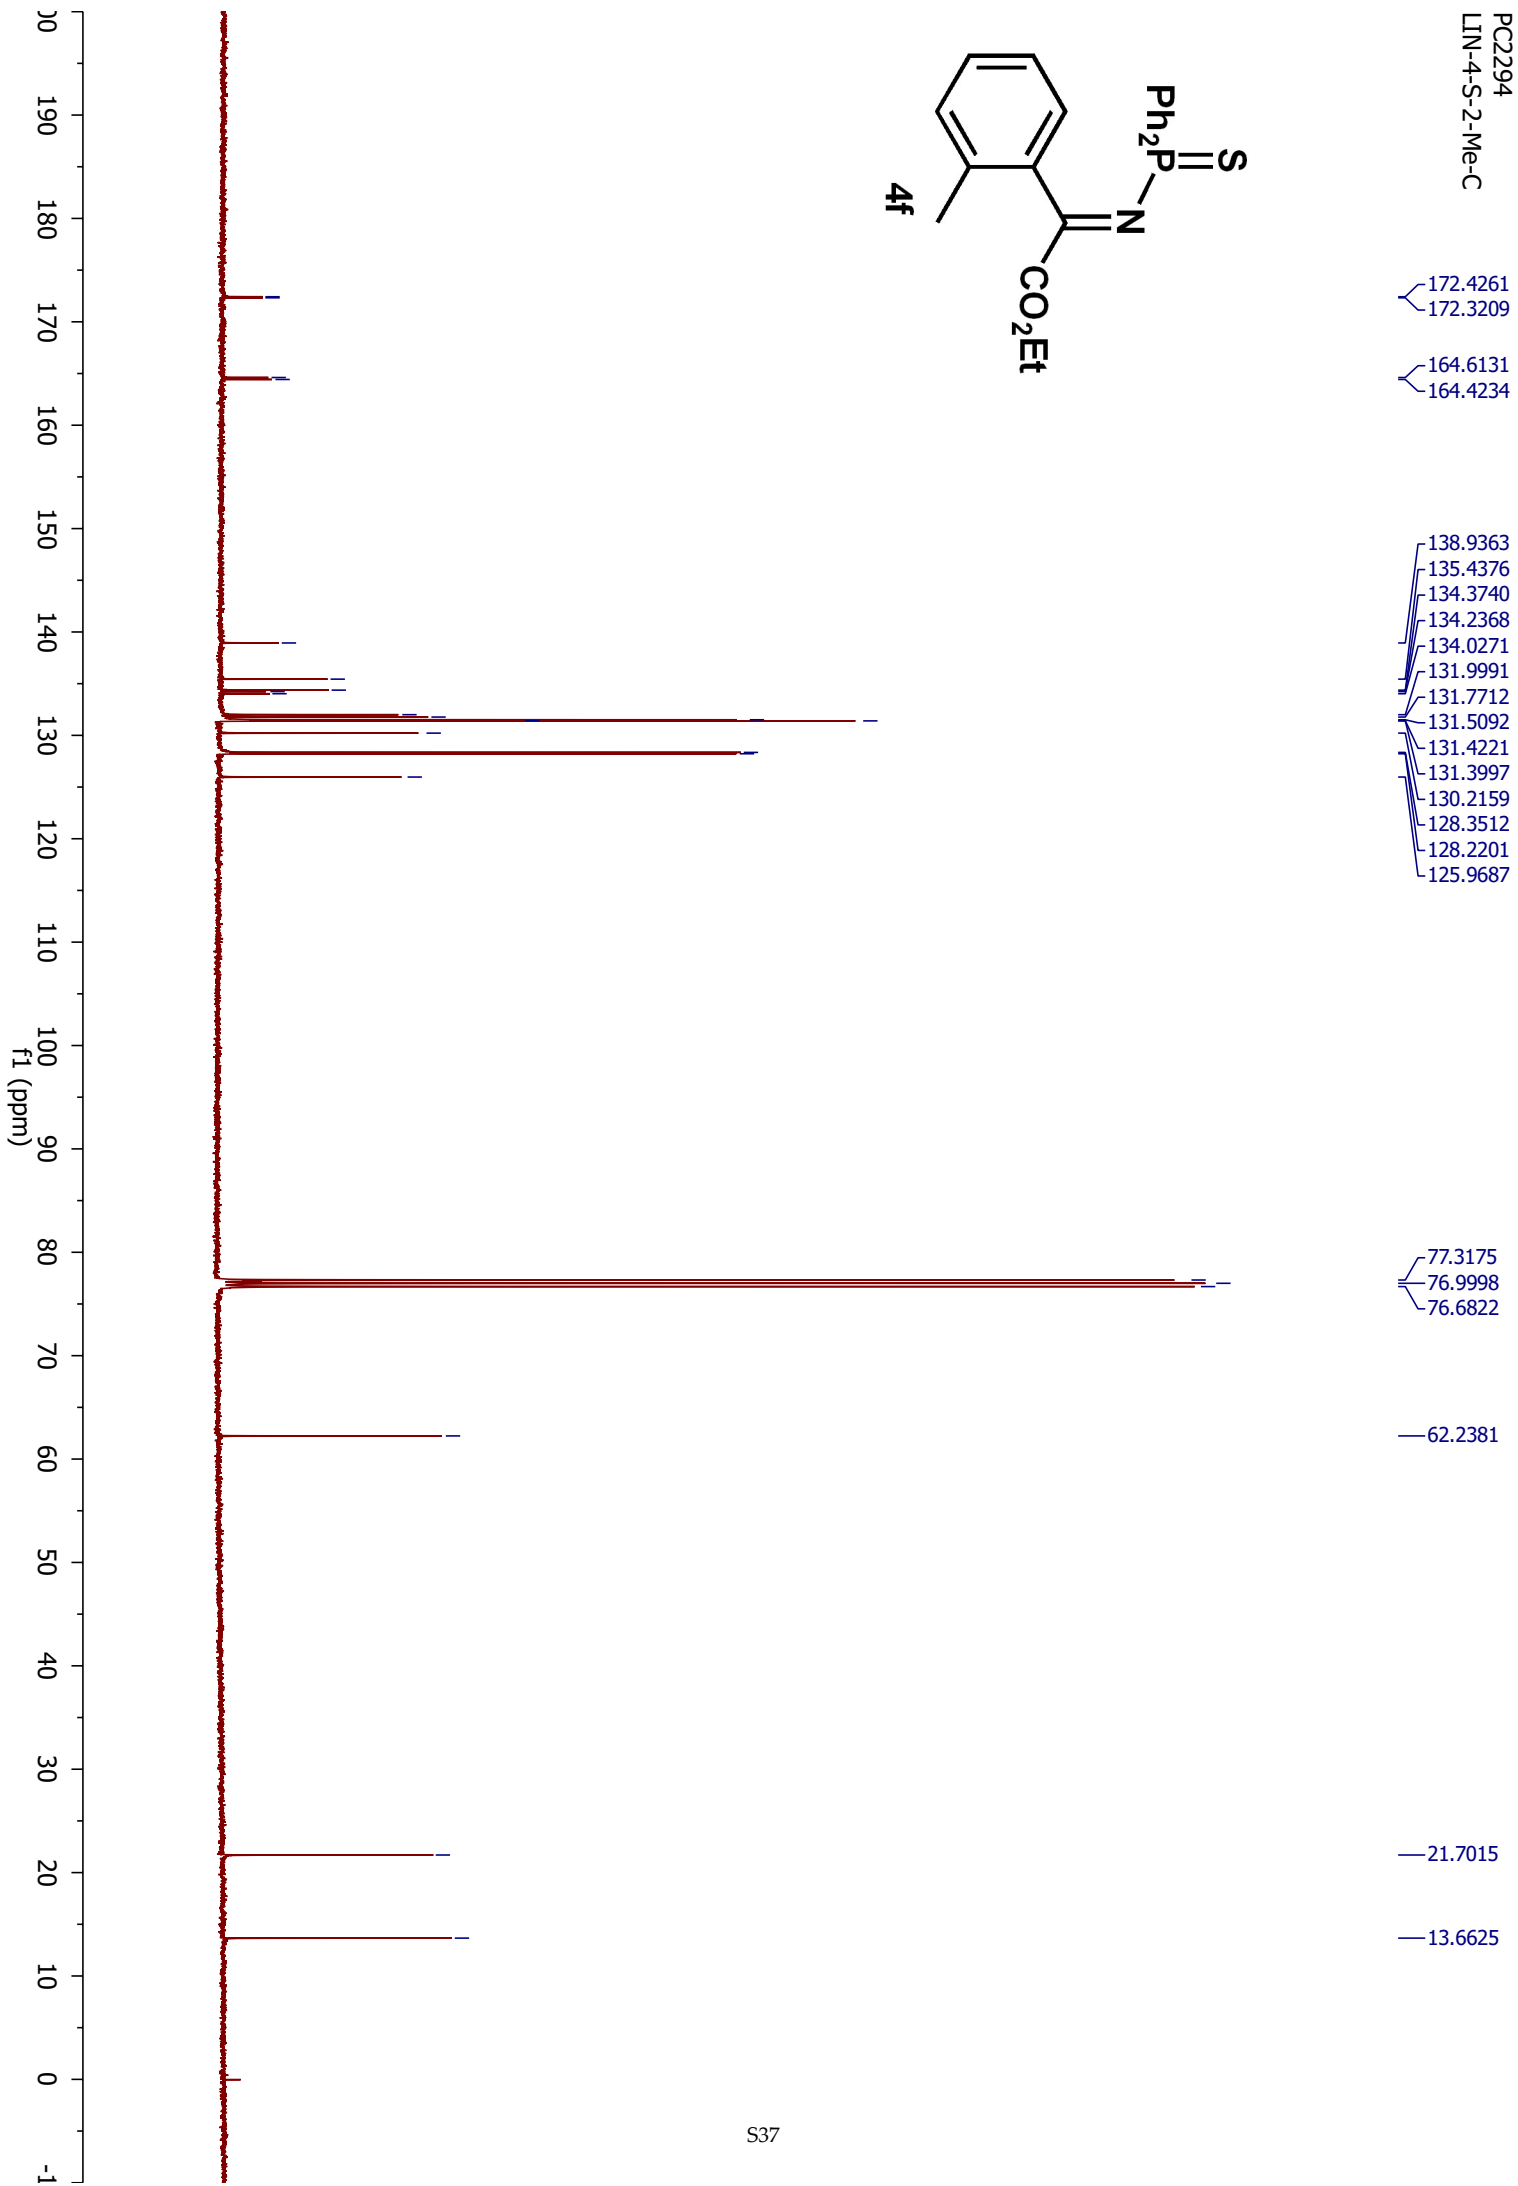

- 8.0669
- 8.0490
- 8.0458
- 8.0350
- 8.0298
- 8.0253
- 8.0153
- 8.0118
- 8.0077
- 8.0008
- 7.9956
- 7.9913
- 7.7582
- 7.7375
- 7.5132
- 7.5005
- 7.4985
- 7.4949
- 7.4939
- 7.4875
- 7.4830
- 7.4782
- 7.4749
- 7.4699
- 7.4664
- 7.4603
- 7.4555
- 7.4518
- 7.4452
- 7.4387
- 7.4356
- 7.4299
- 7.2551

- 4.5047
- 4.4867
- 4.4687
- 4.4508

- 1.5495
- 1.3625
- 1.3445
- 1.3266

0.0000

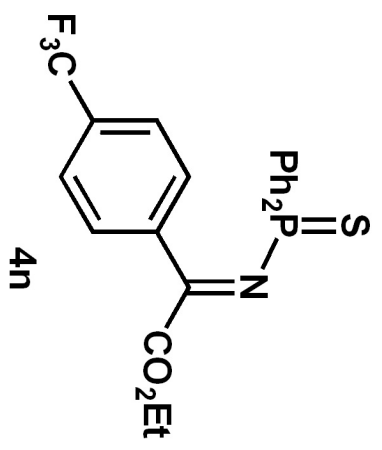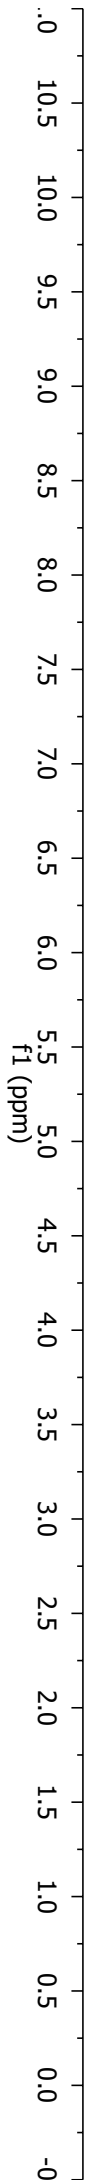

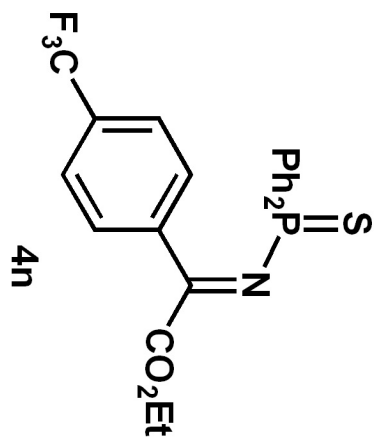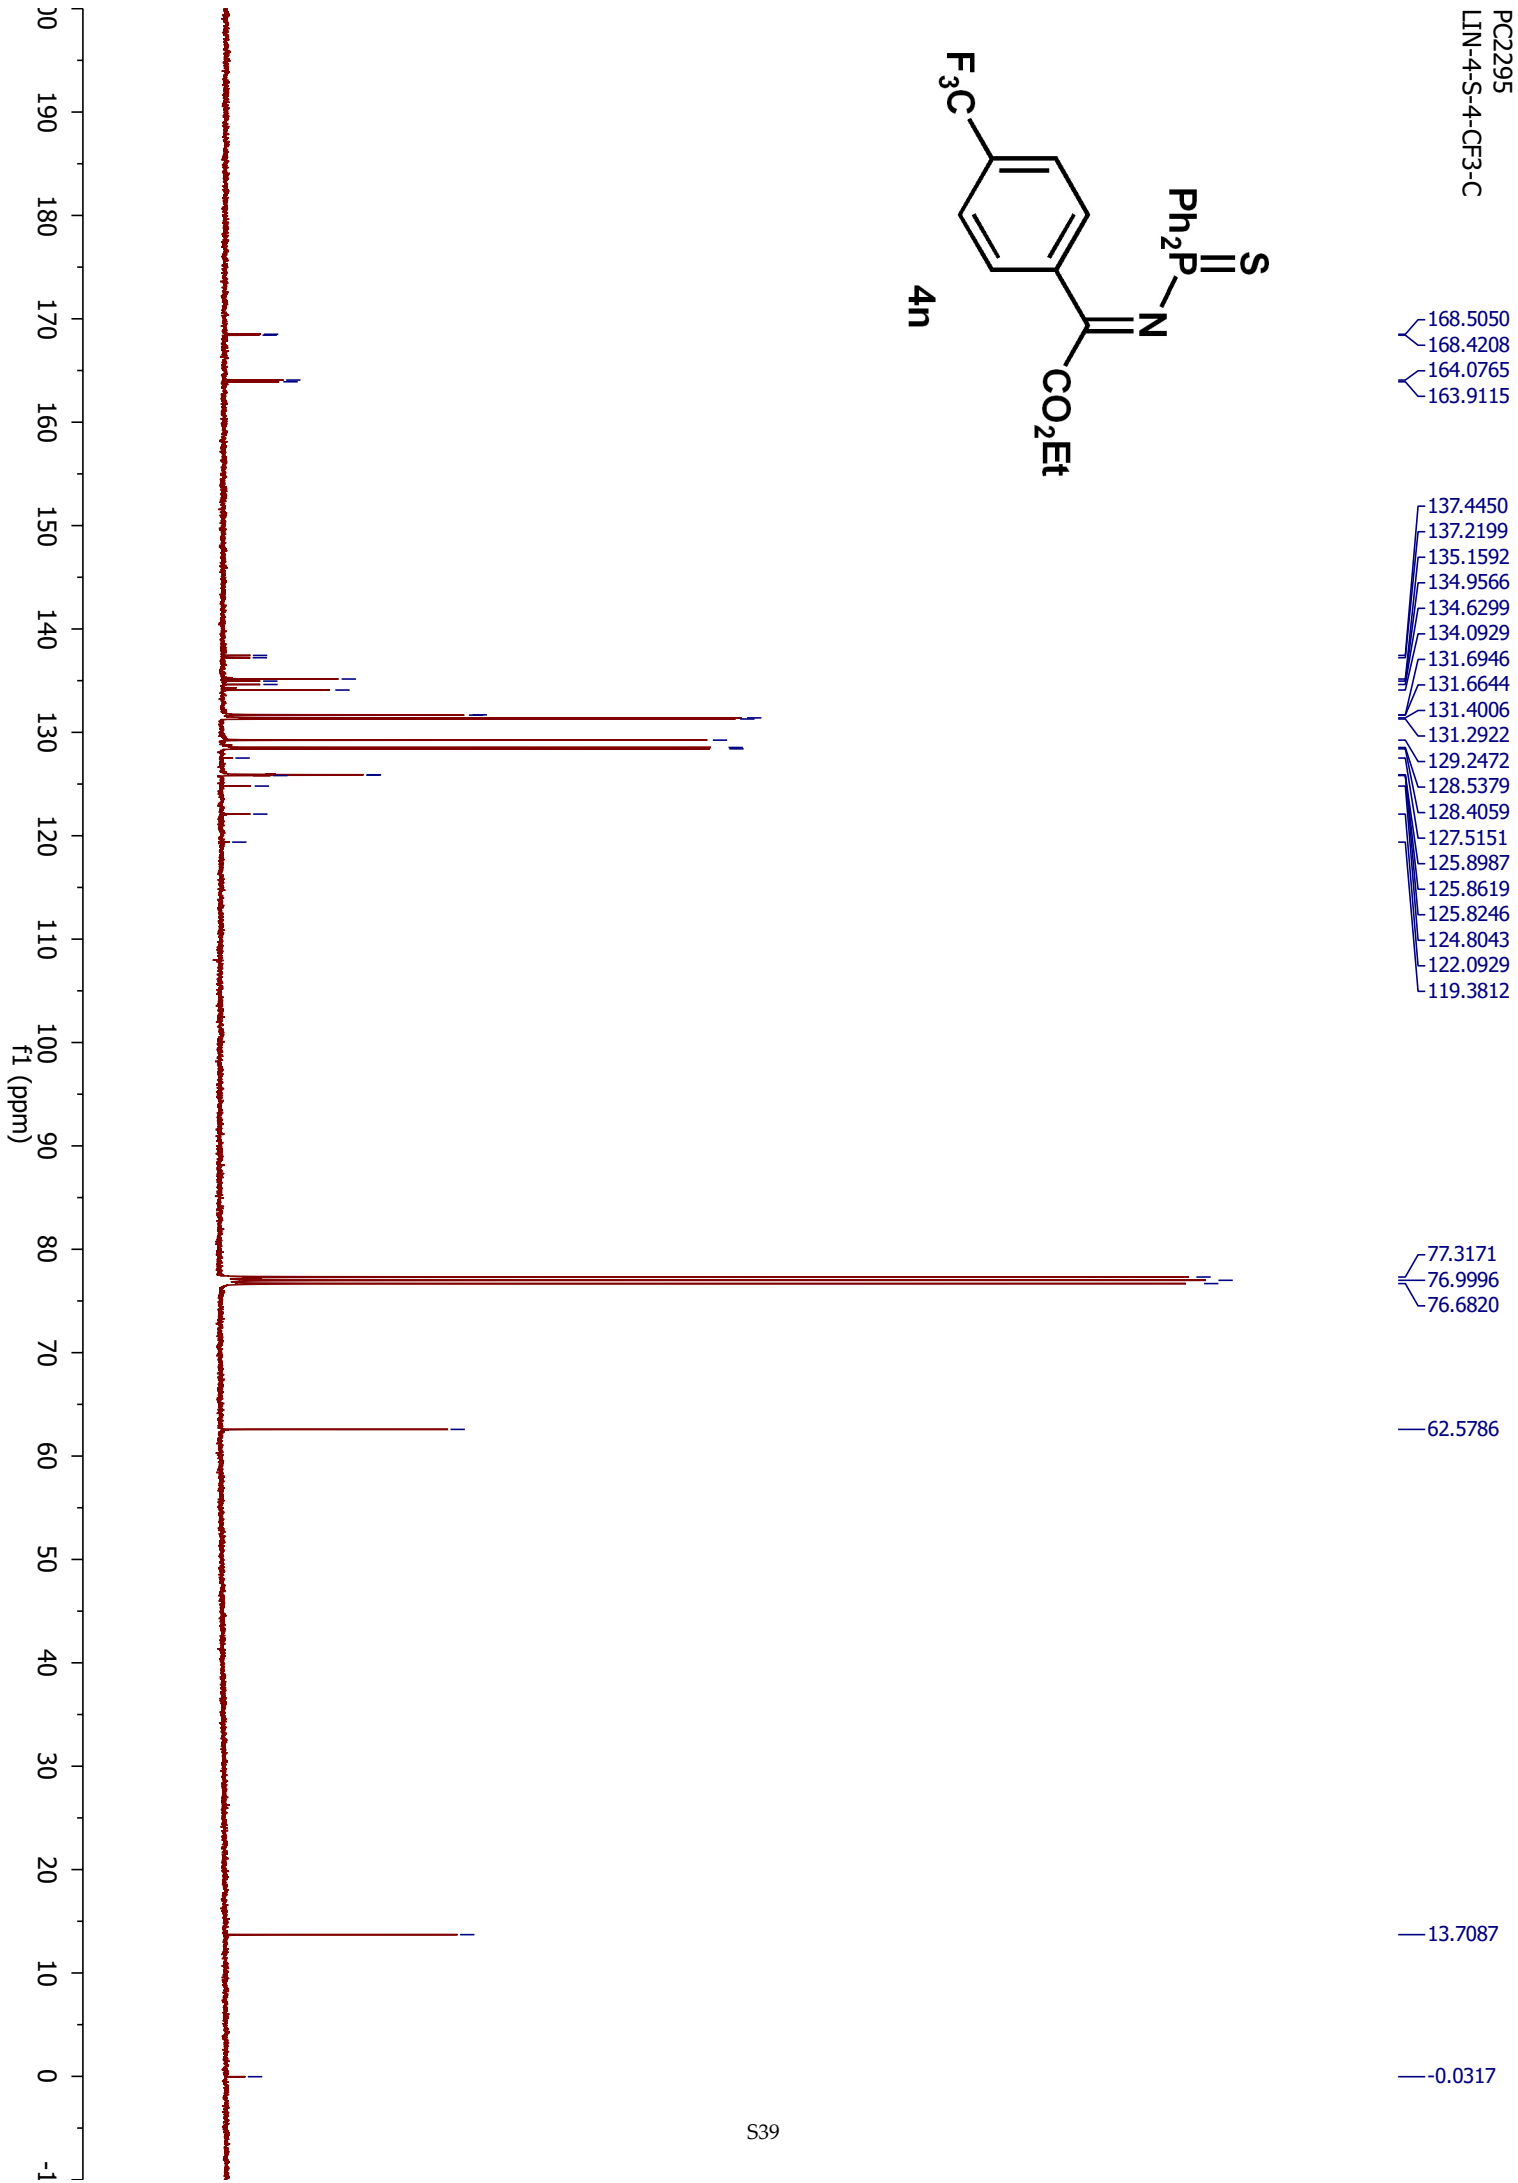

8.2917  
8.2859  
8.2834  
8.2522  
8.2203  
8.2154  
8.2054  
8.2017  
7.9911  
7.9860  
7.9814  
7.9302  
7.9257  
7.7077  
7.7032  
7.6878  
7.6833  
7.5021  
7.4973  
7.4851  
7.4823  
7.4796  
7.4775  
7.4726  
7.4679  
7.4627  
7.4586  
7.4546  
7.4487  
7.4442  
7.4405  
7.4346  
7.4311  
7.4255  
7.4186  
7.3486  
7.3285  
7.2551

4.4849  
4.4669  
4.4490  
4.4311

2.4468

1.5507  
1.3486  
1.3307  
1.3128

0.0000

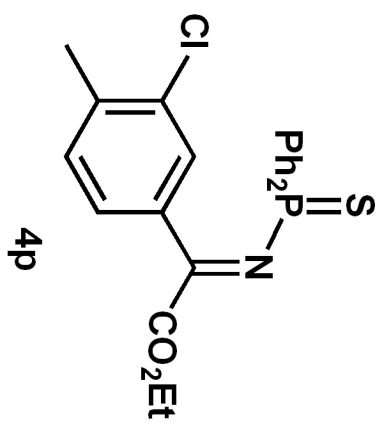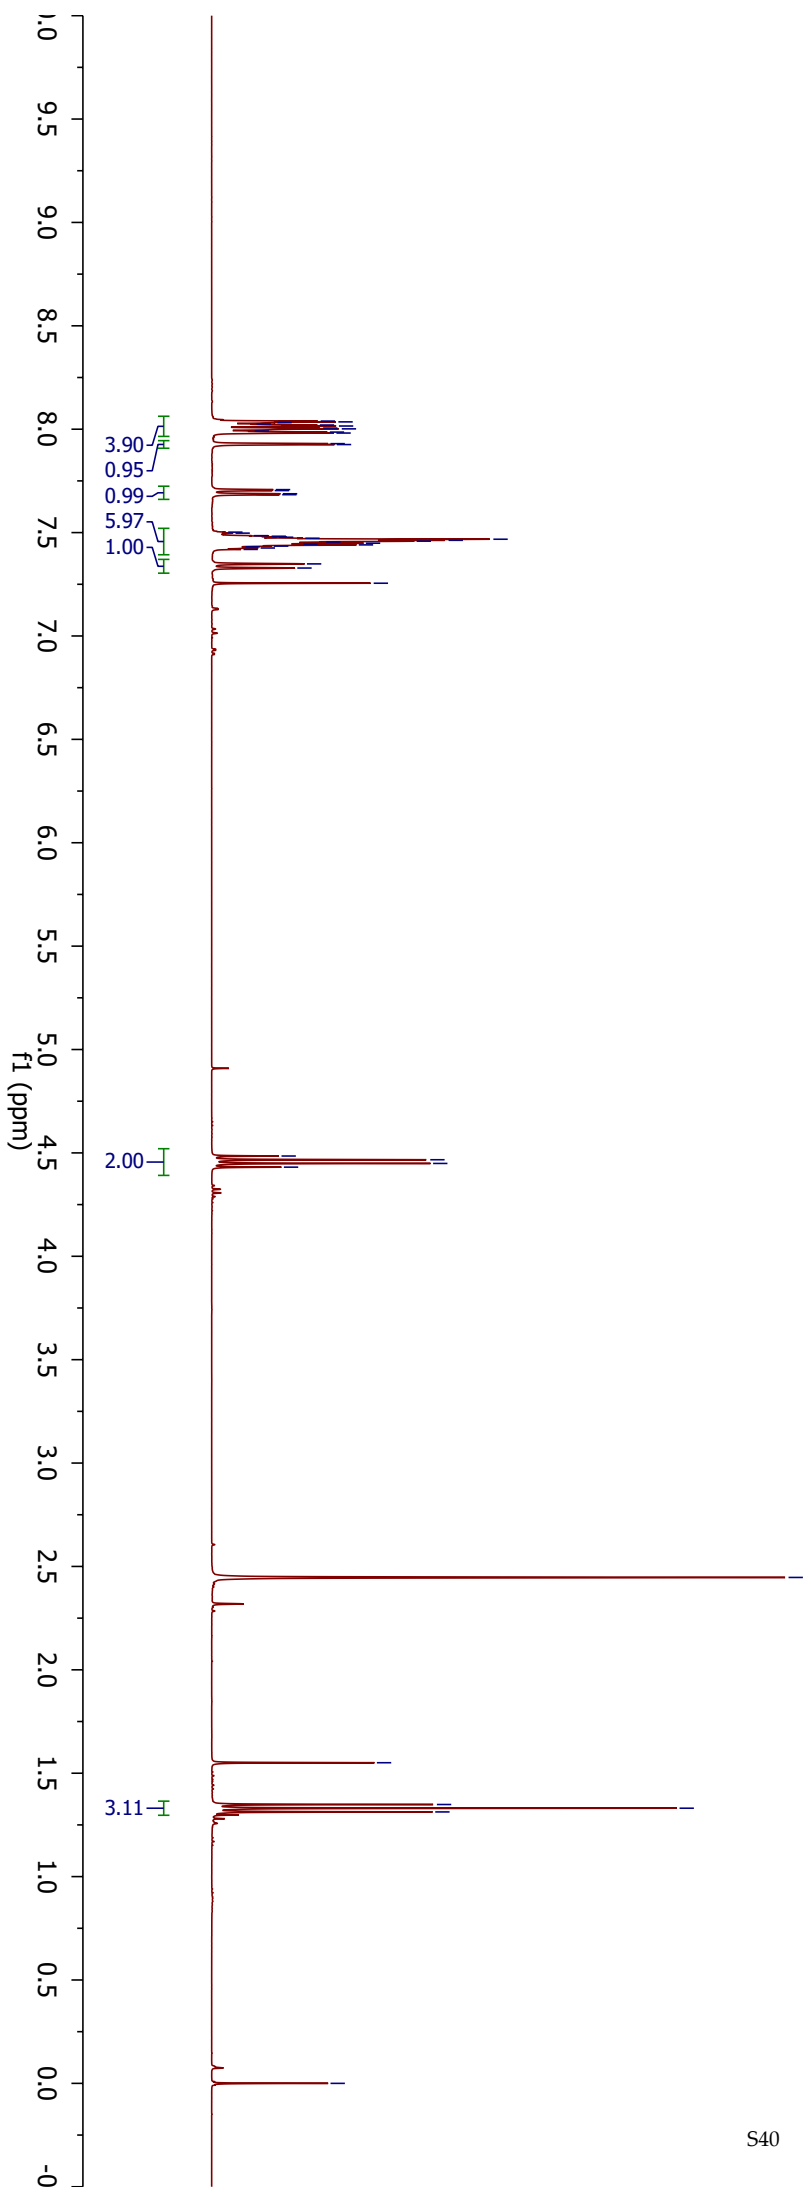



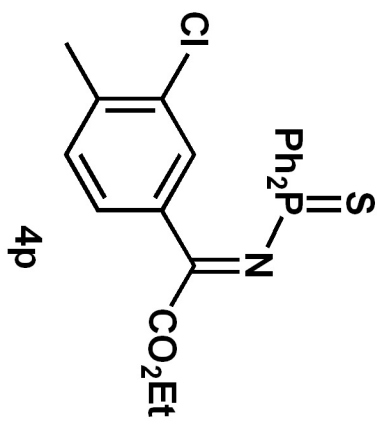

168.6163  
168.5315  
164.2398  
164.0724

142.6013  
135.5447  
135.2818  
134.4764  
133.7493  
133.5215  
131.5171  
131.4874  
131.3755  
131.3319  
131.2678  
129.1841  
128.4625  
128.3312  
127.2767

77.3177  
77.0002  
76.6827

62.3890

20.4817

13.7042

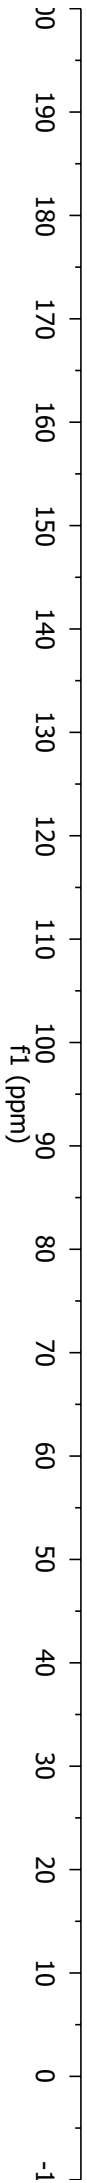

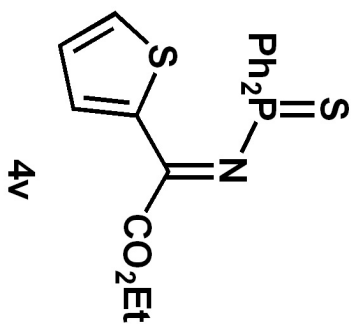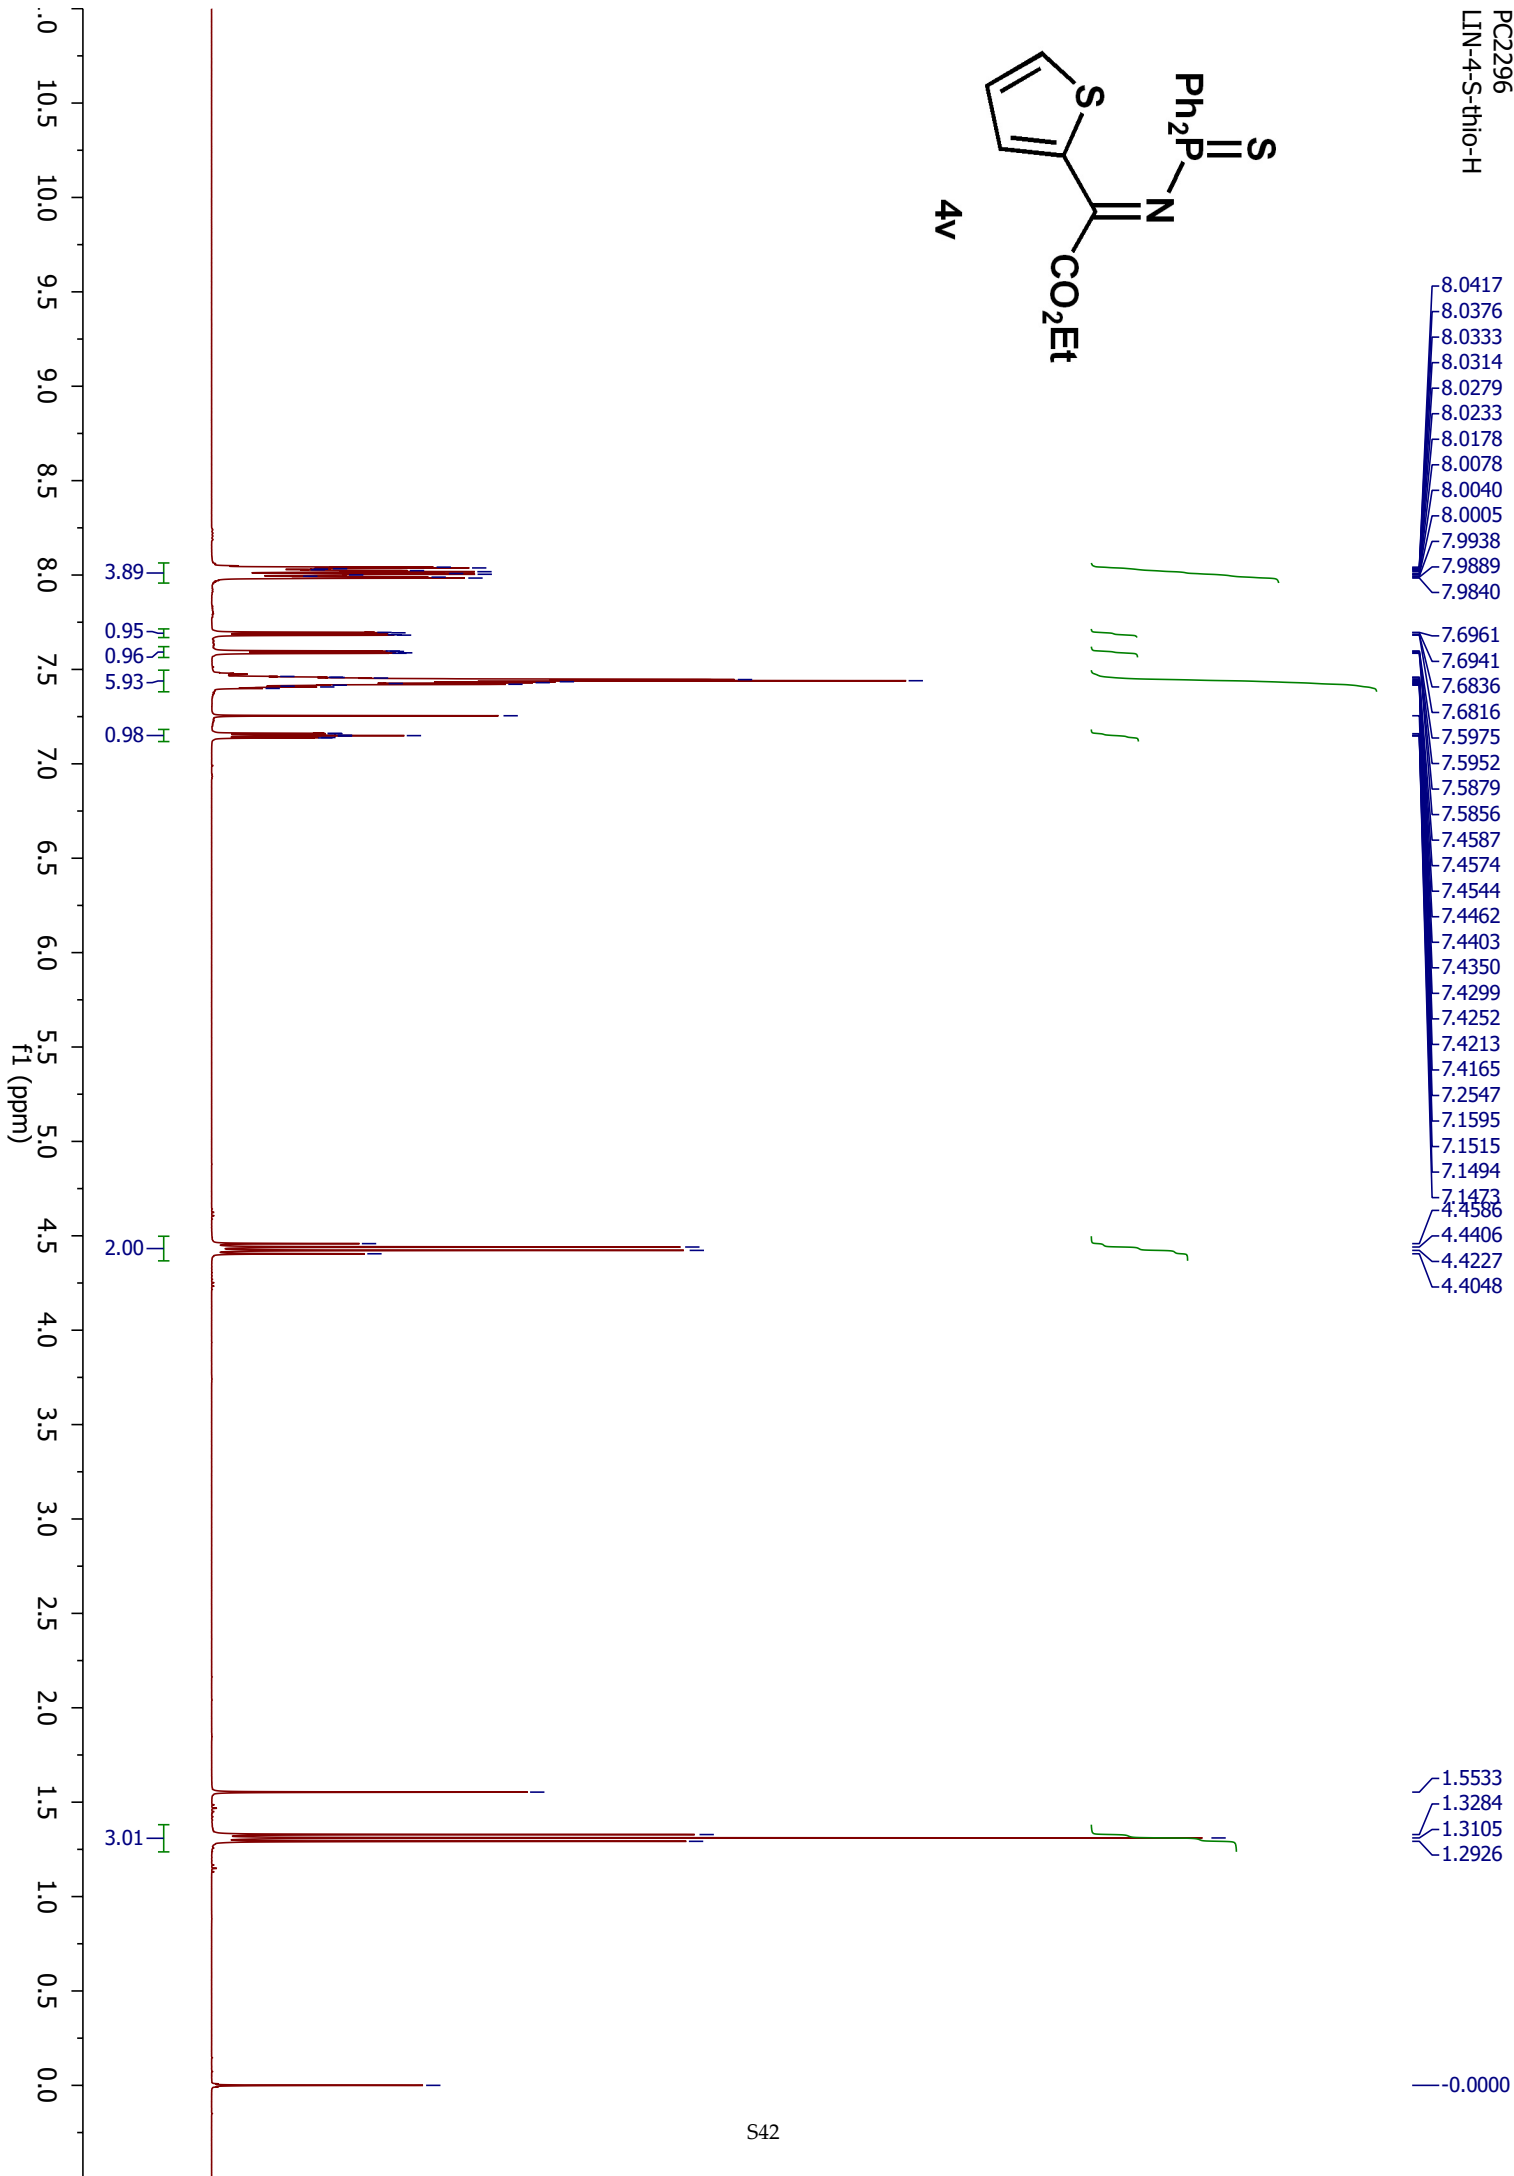

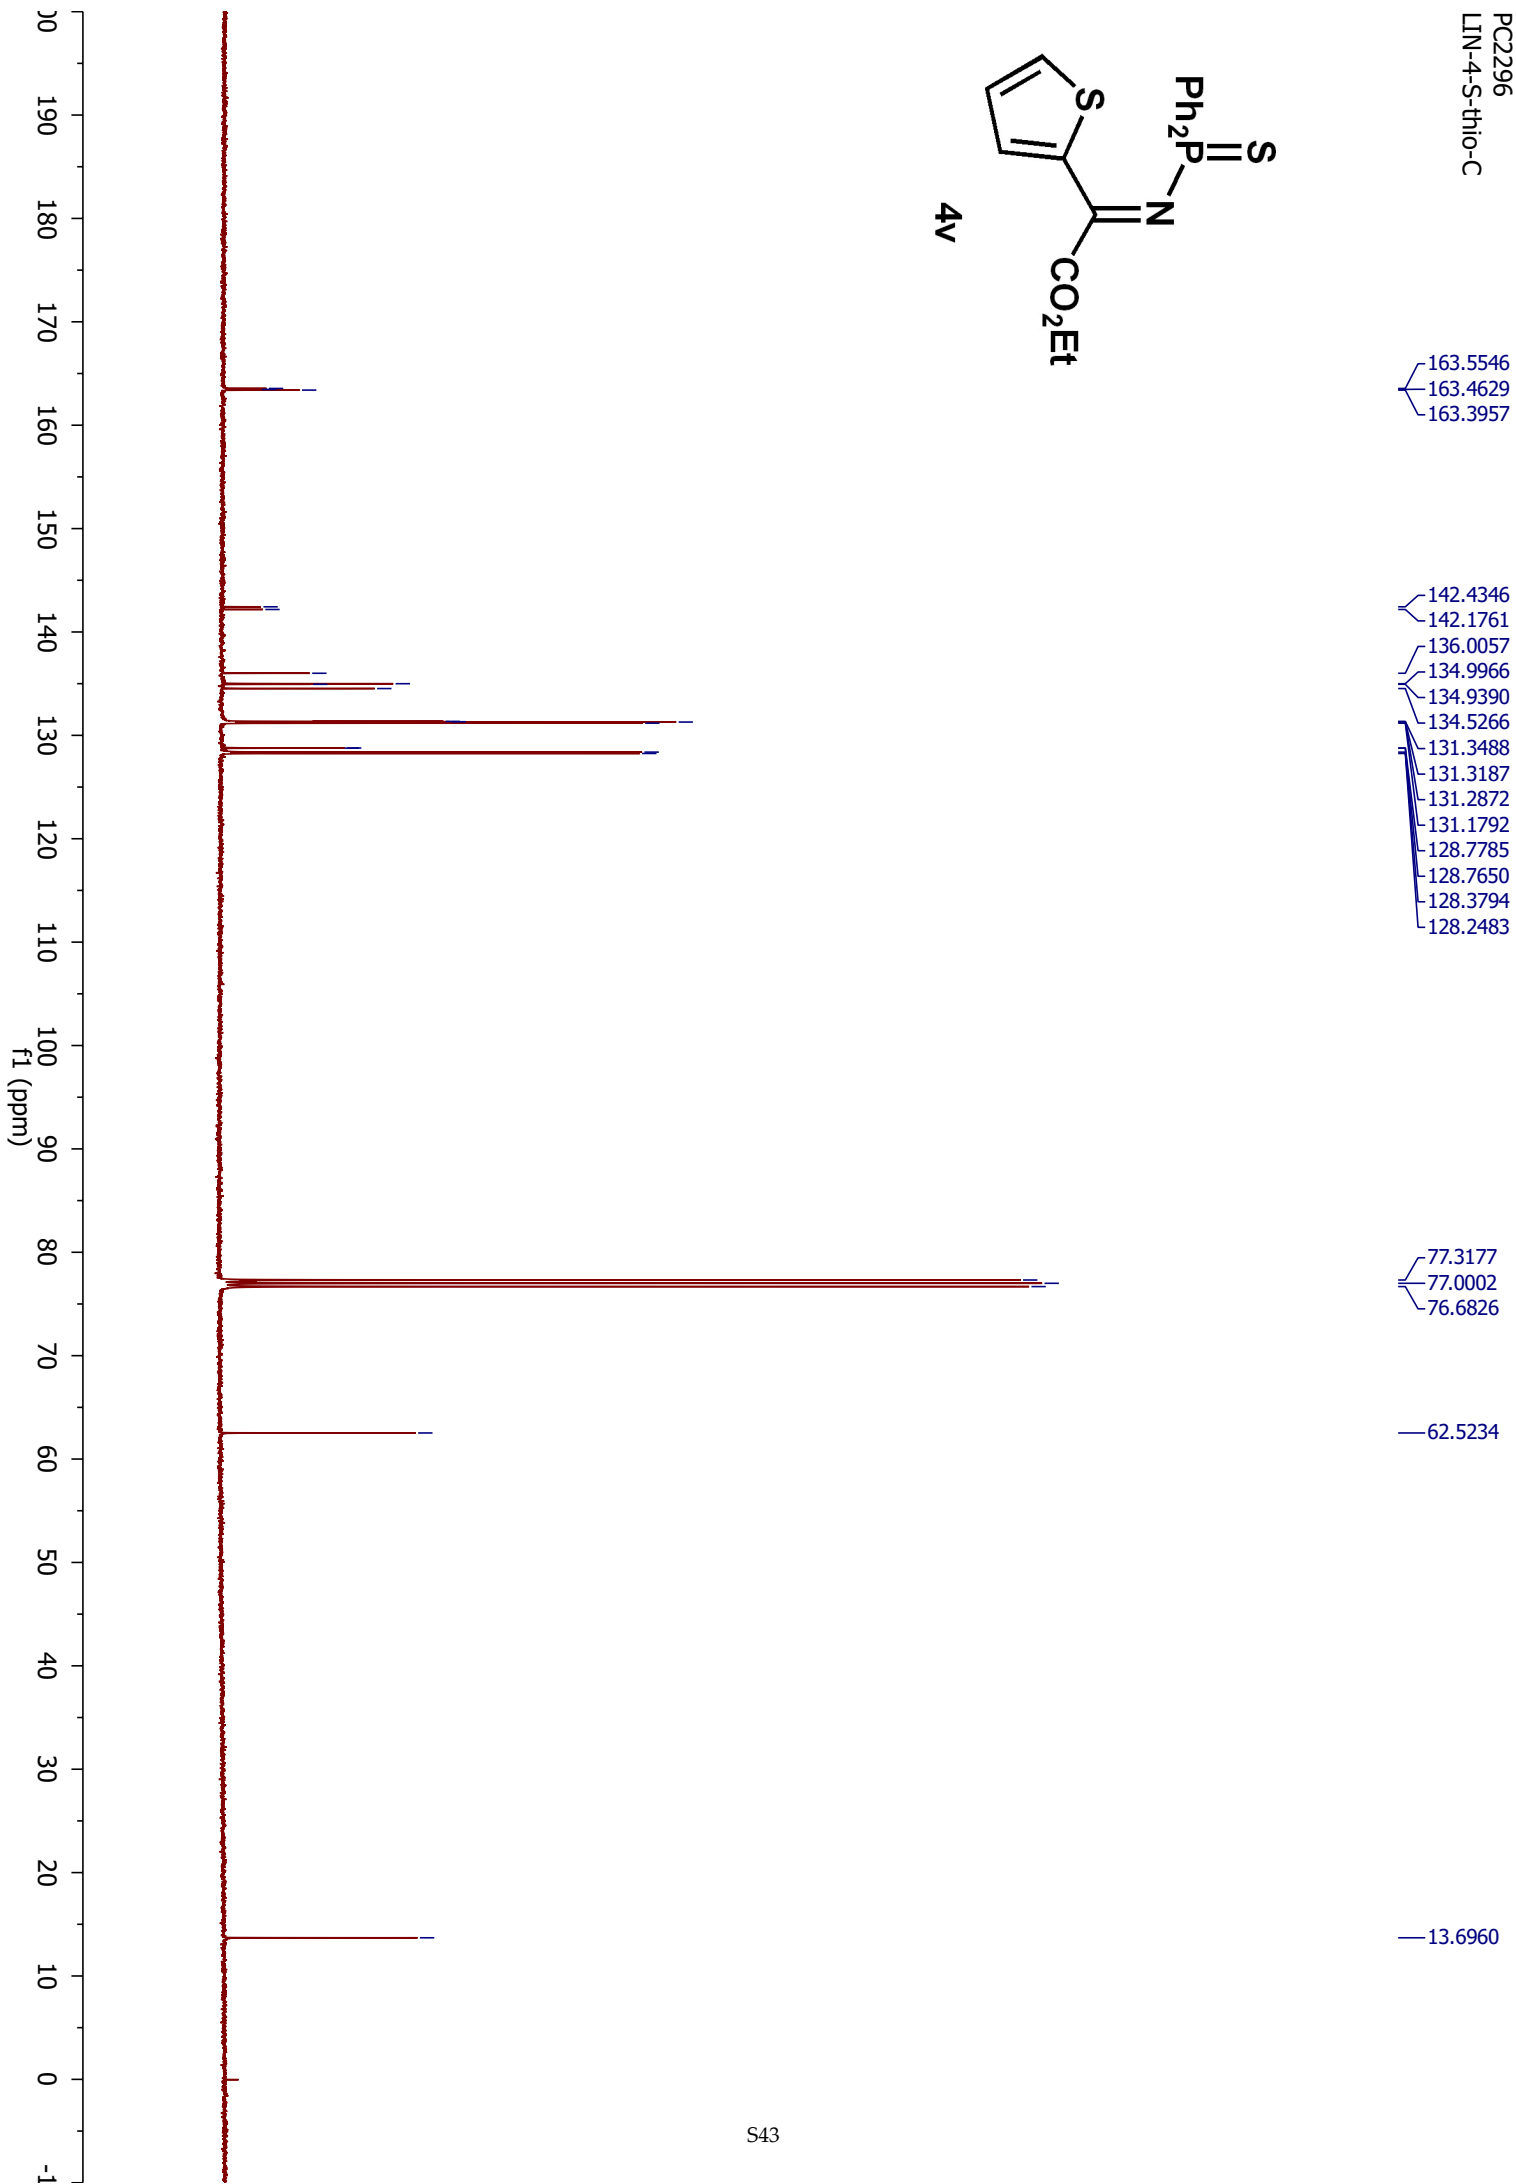

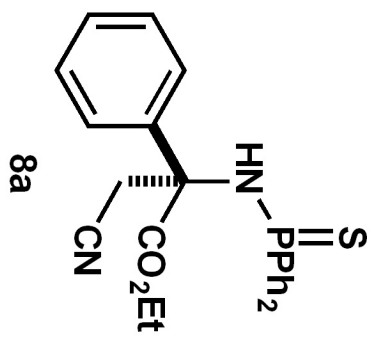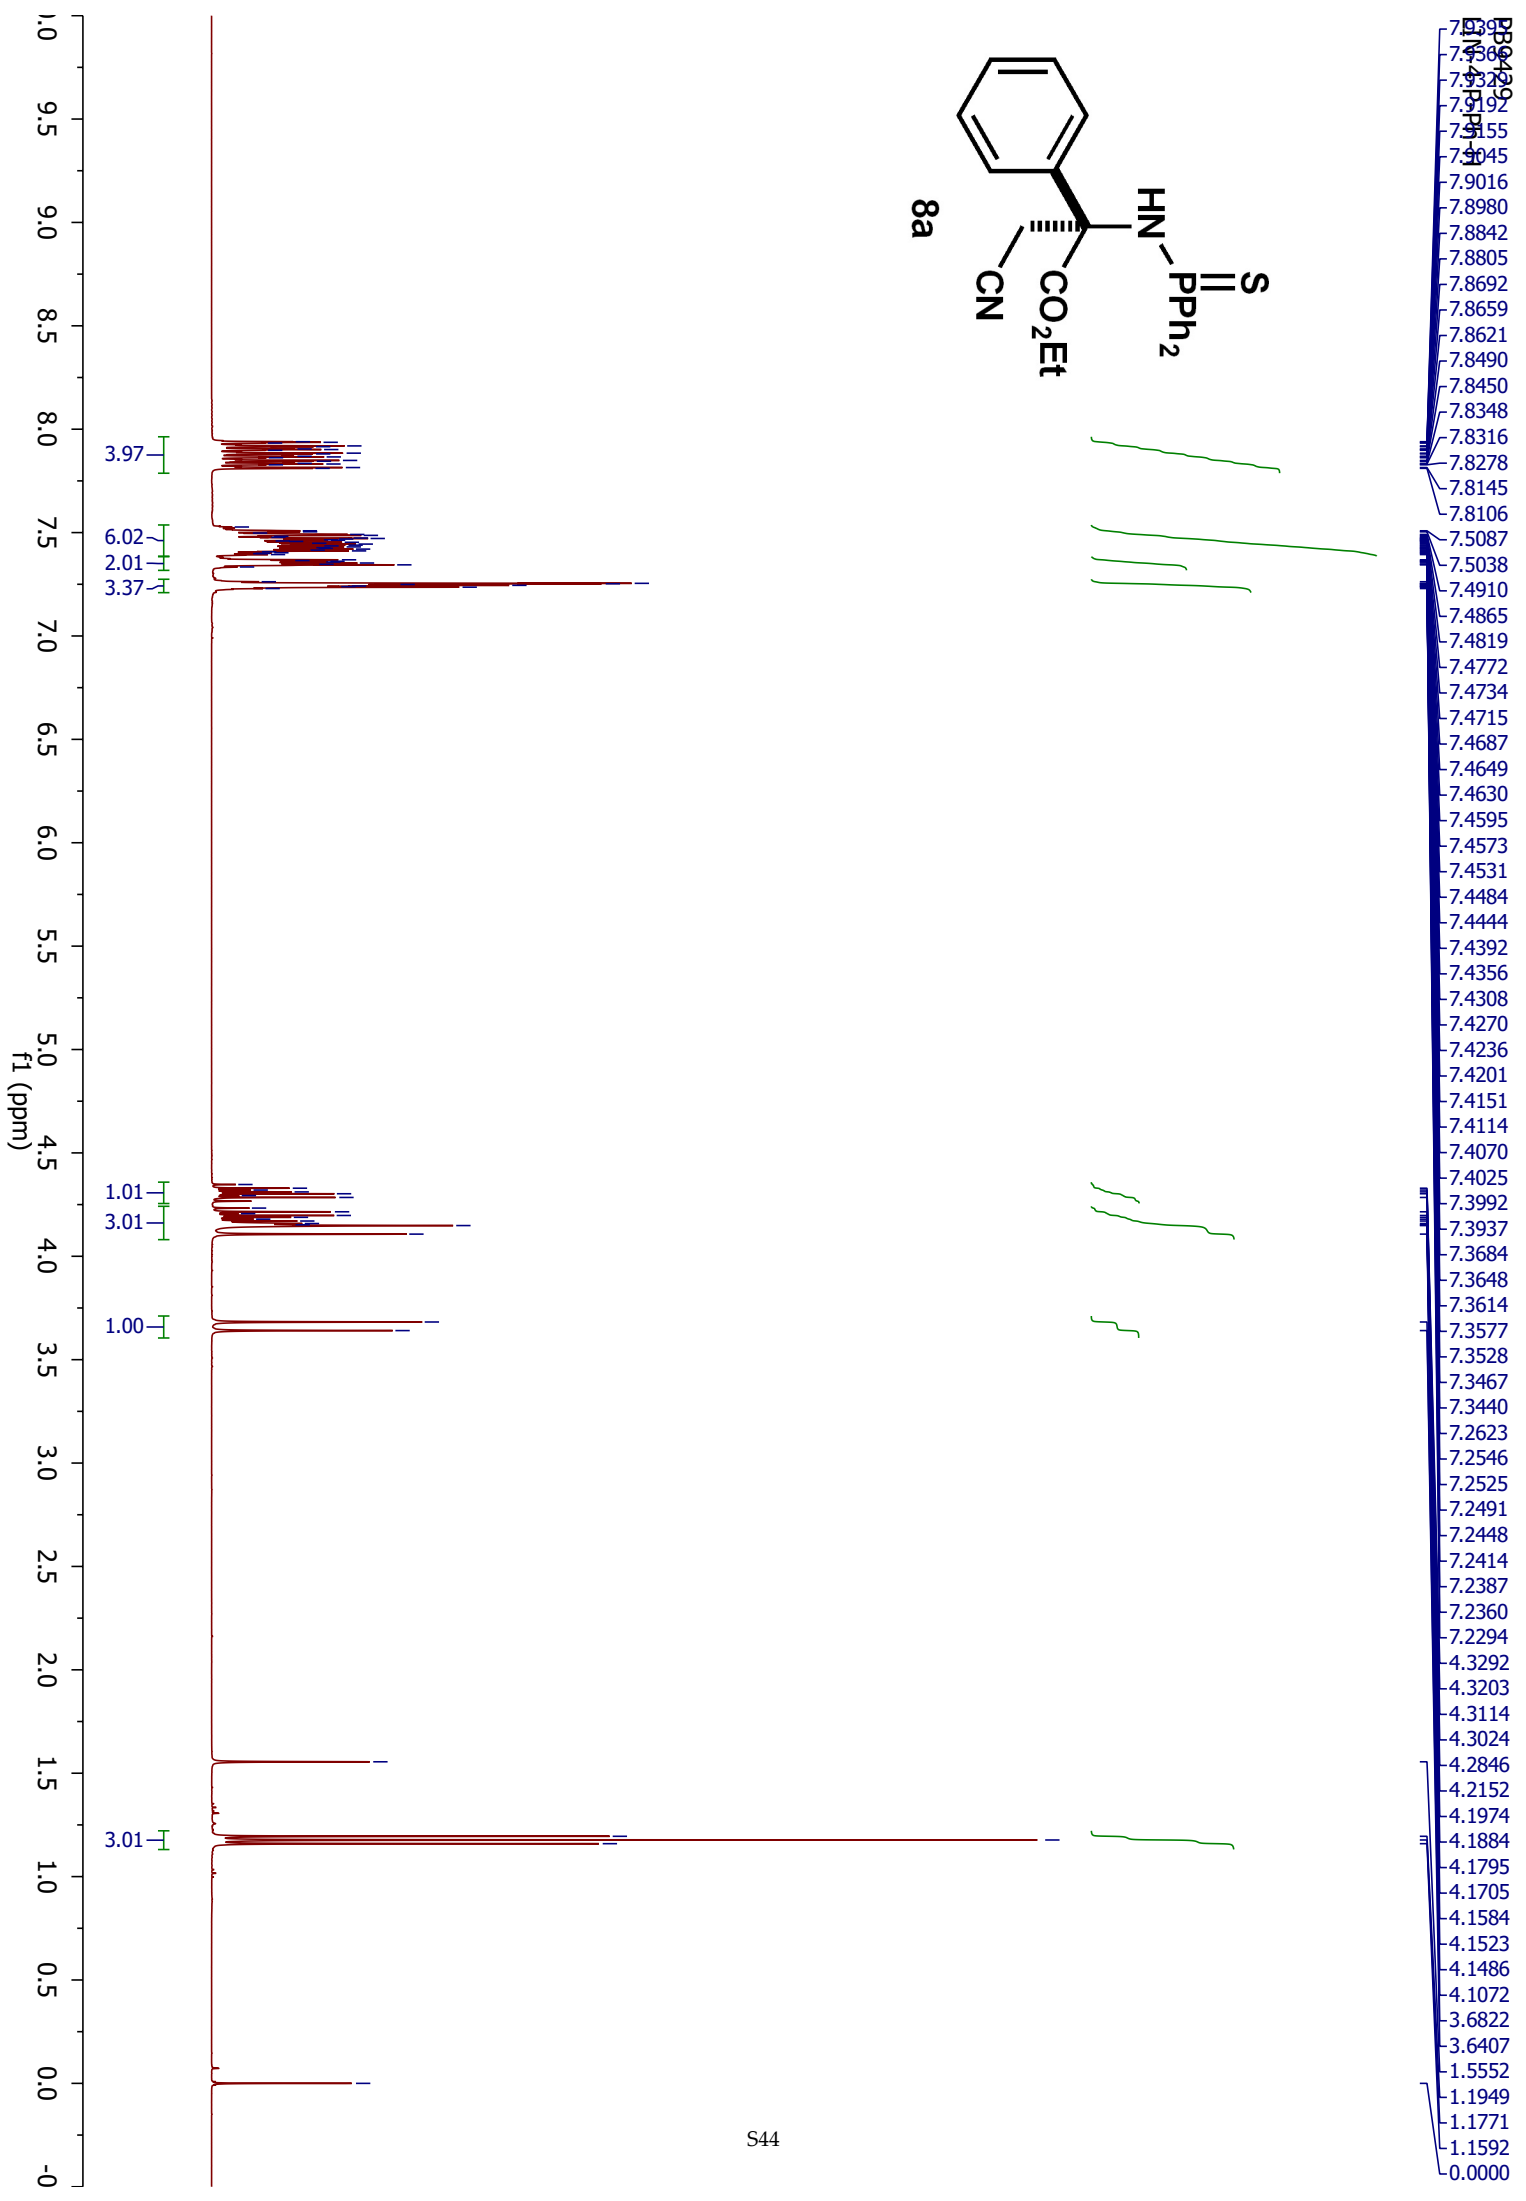

171.6807  
171.6226

137.6289  
137.5577  
136.2538  
135.2237  
134.4914  
133.4735  
132.1609  
132.0462  
131.8597  
131.8323  
130.7722  
130.6582  
128.9021  
128.7398  
128.6478  
128.6074  
128.3578  
128.2246  
125.9270  
117.0094

77.3172  
76.9996  
76.6820

65.0154  
63.0267

28.1454

13.6602

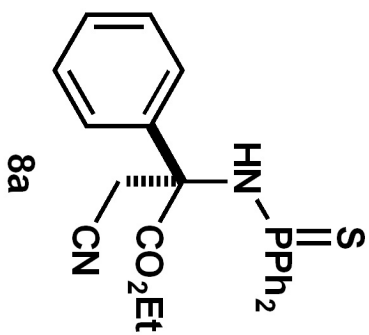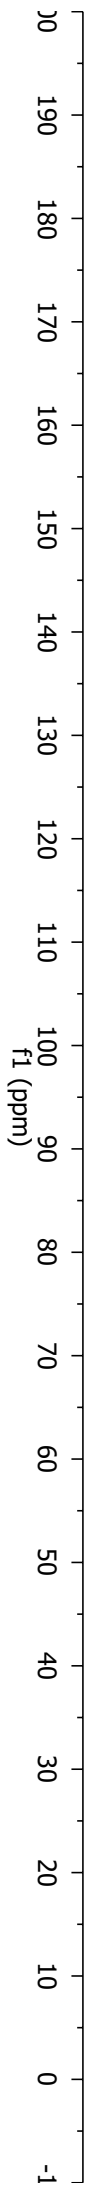

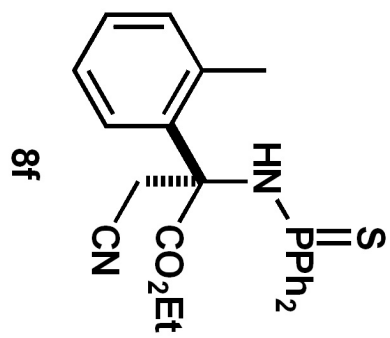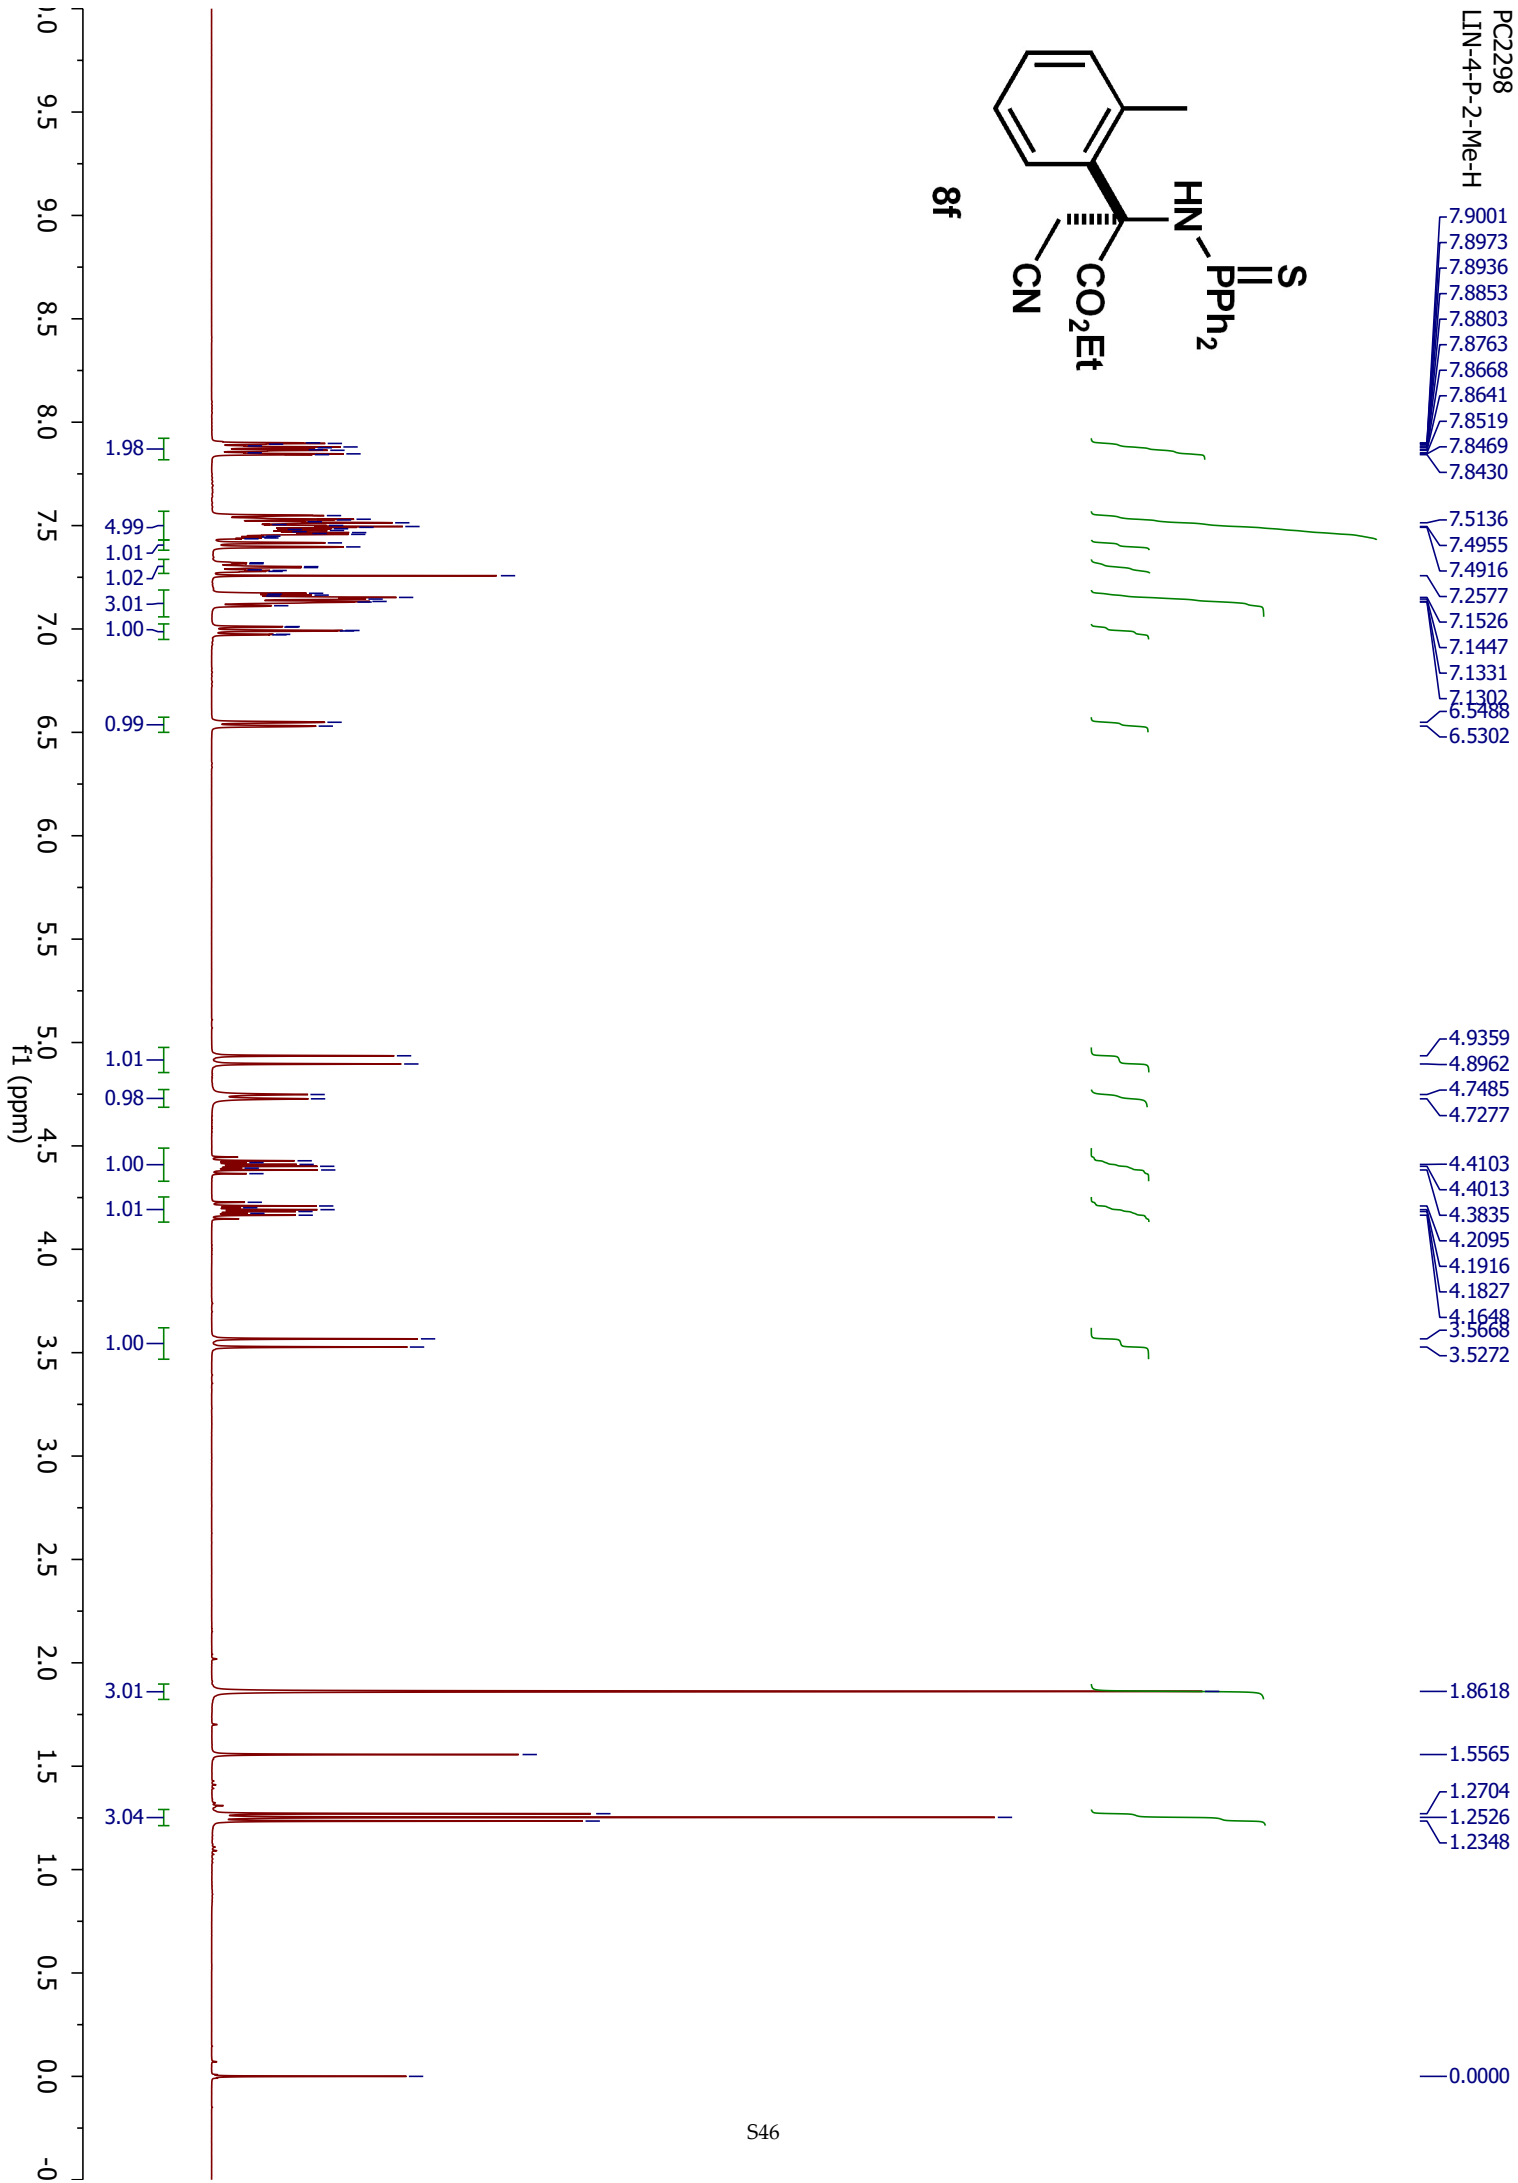

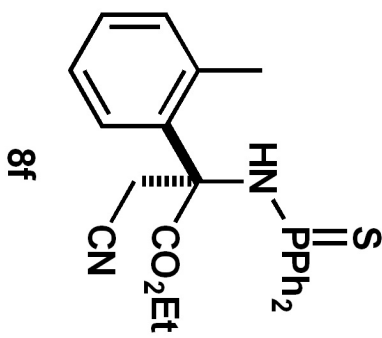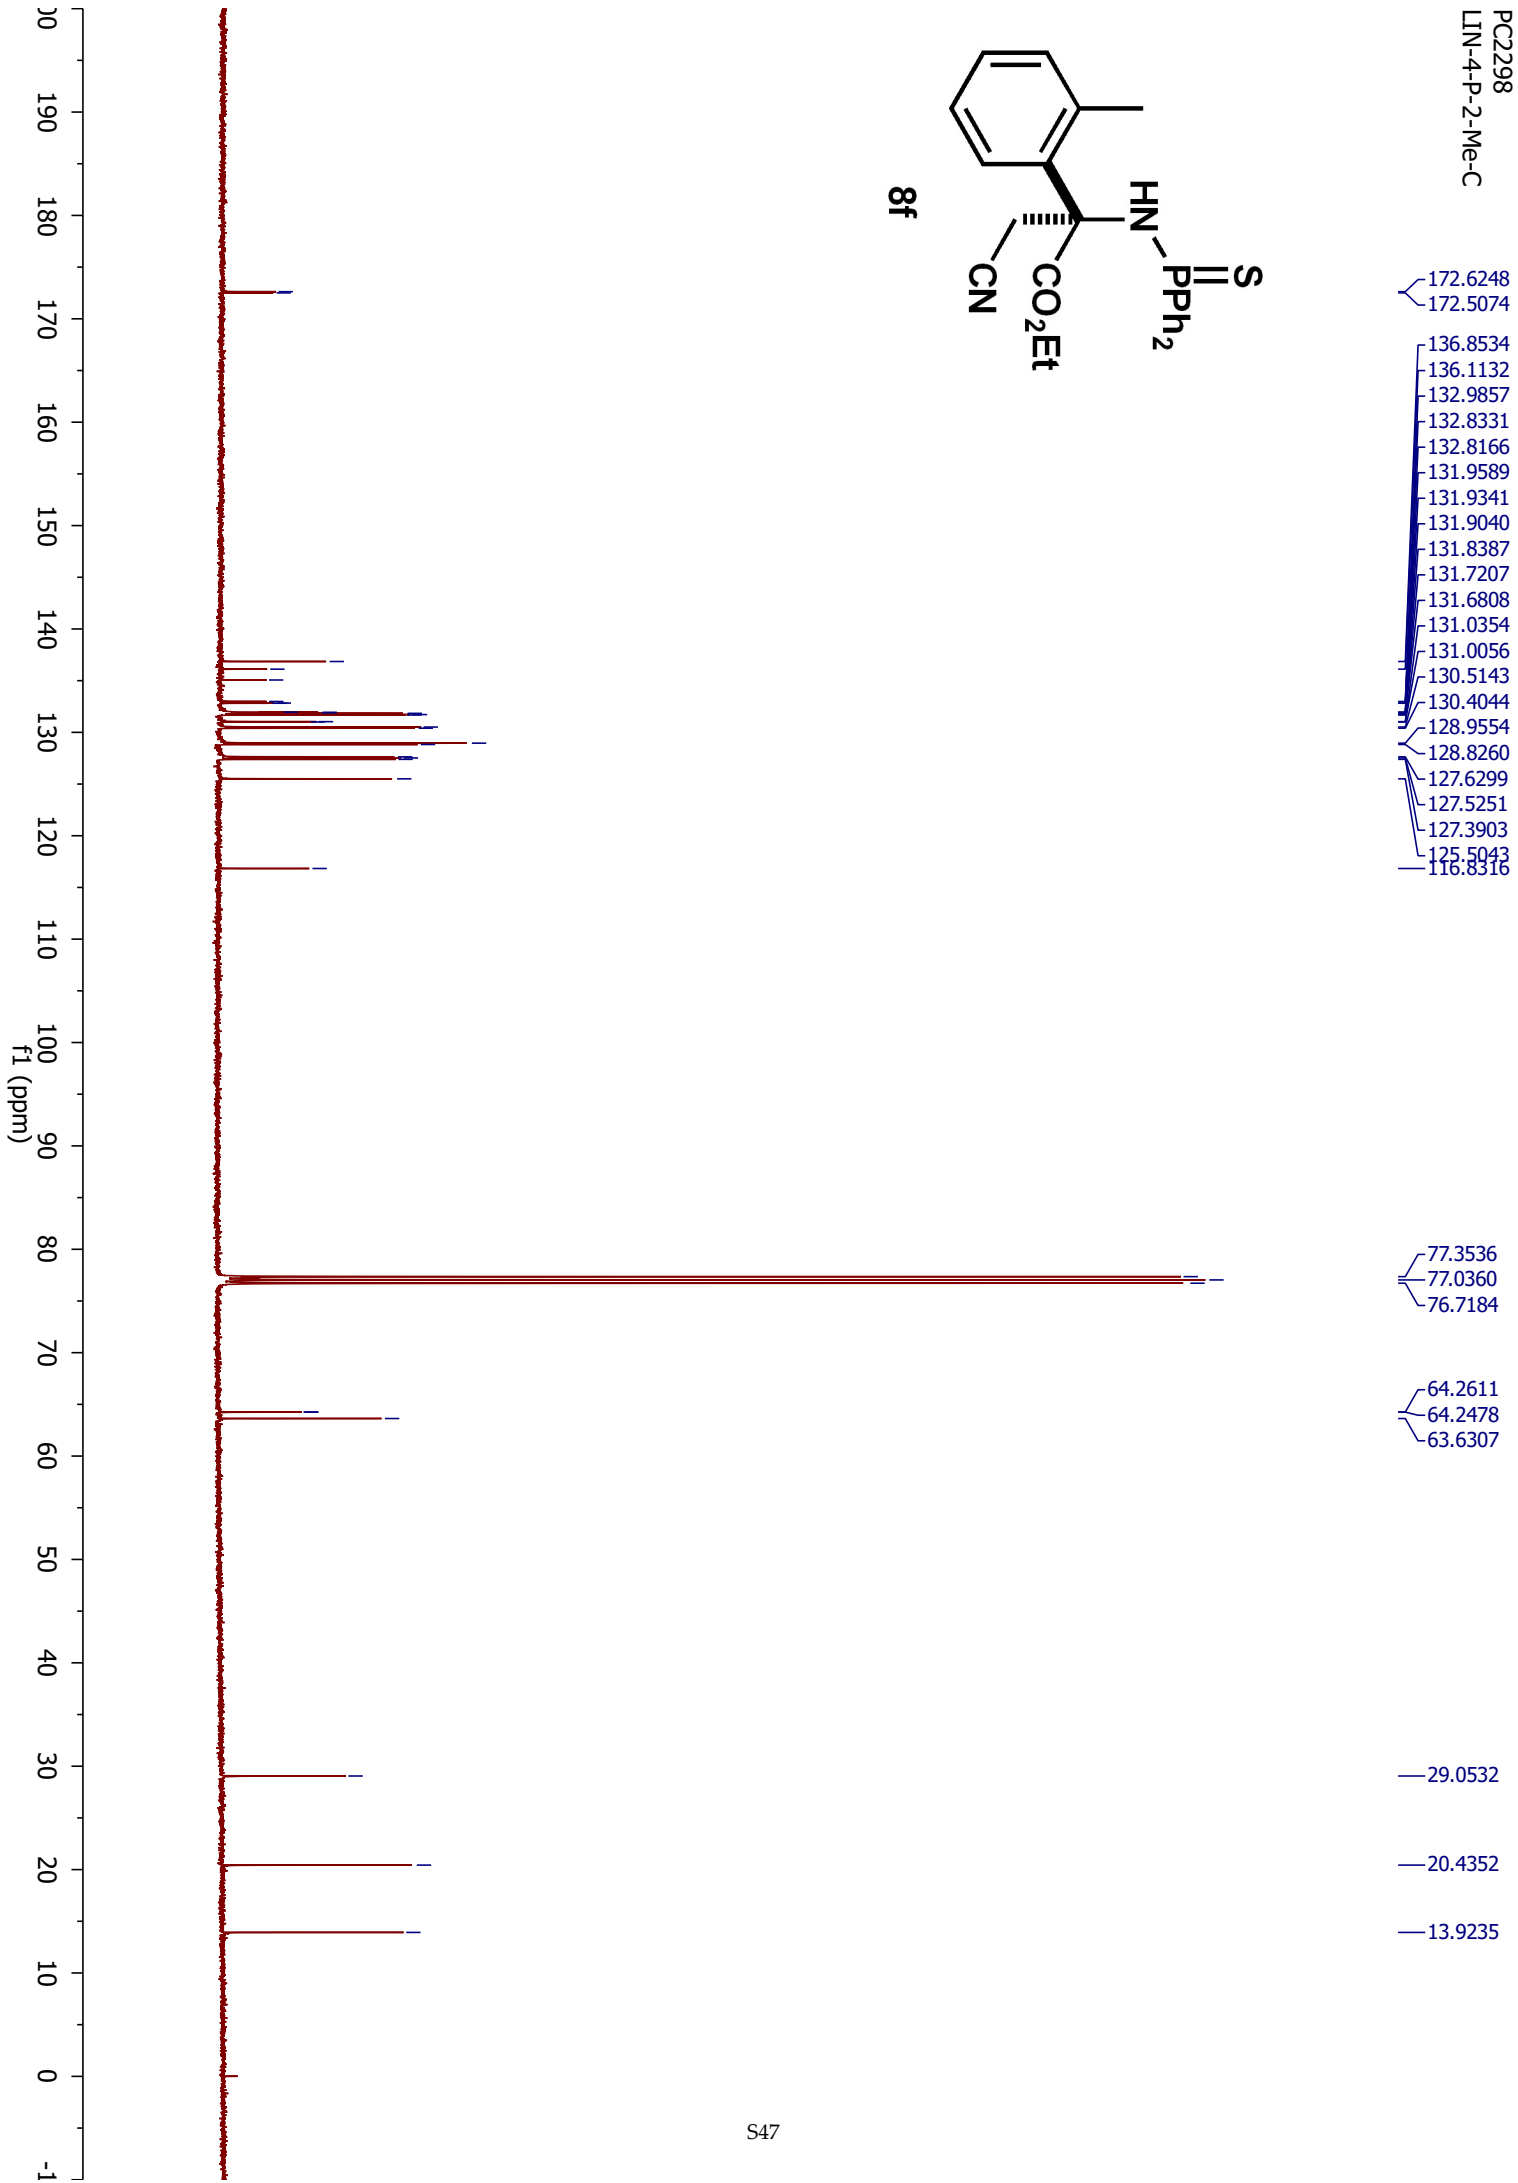

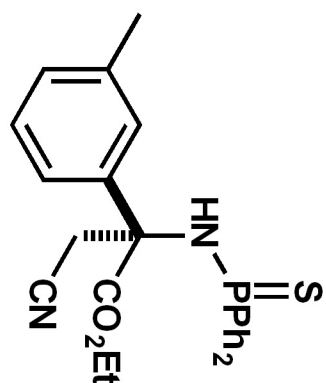

8g

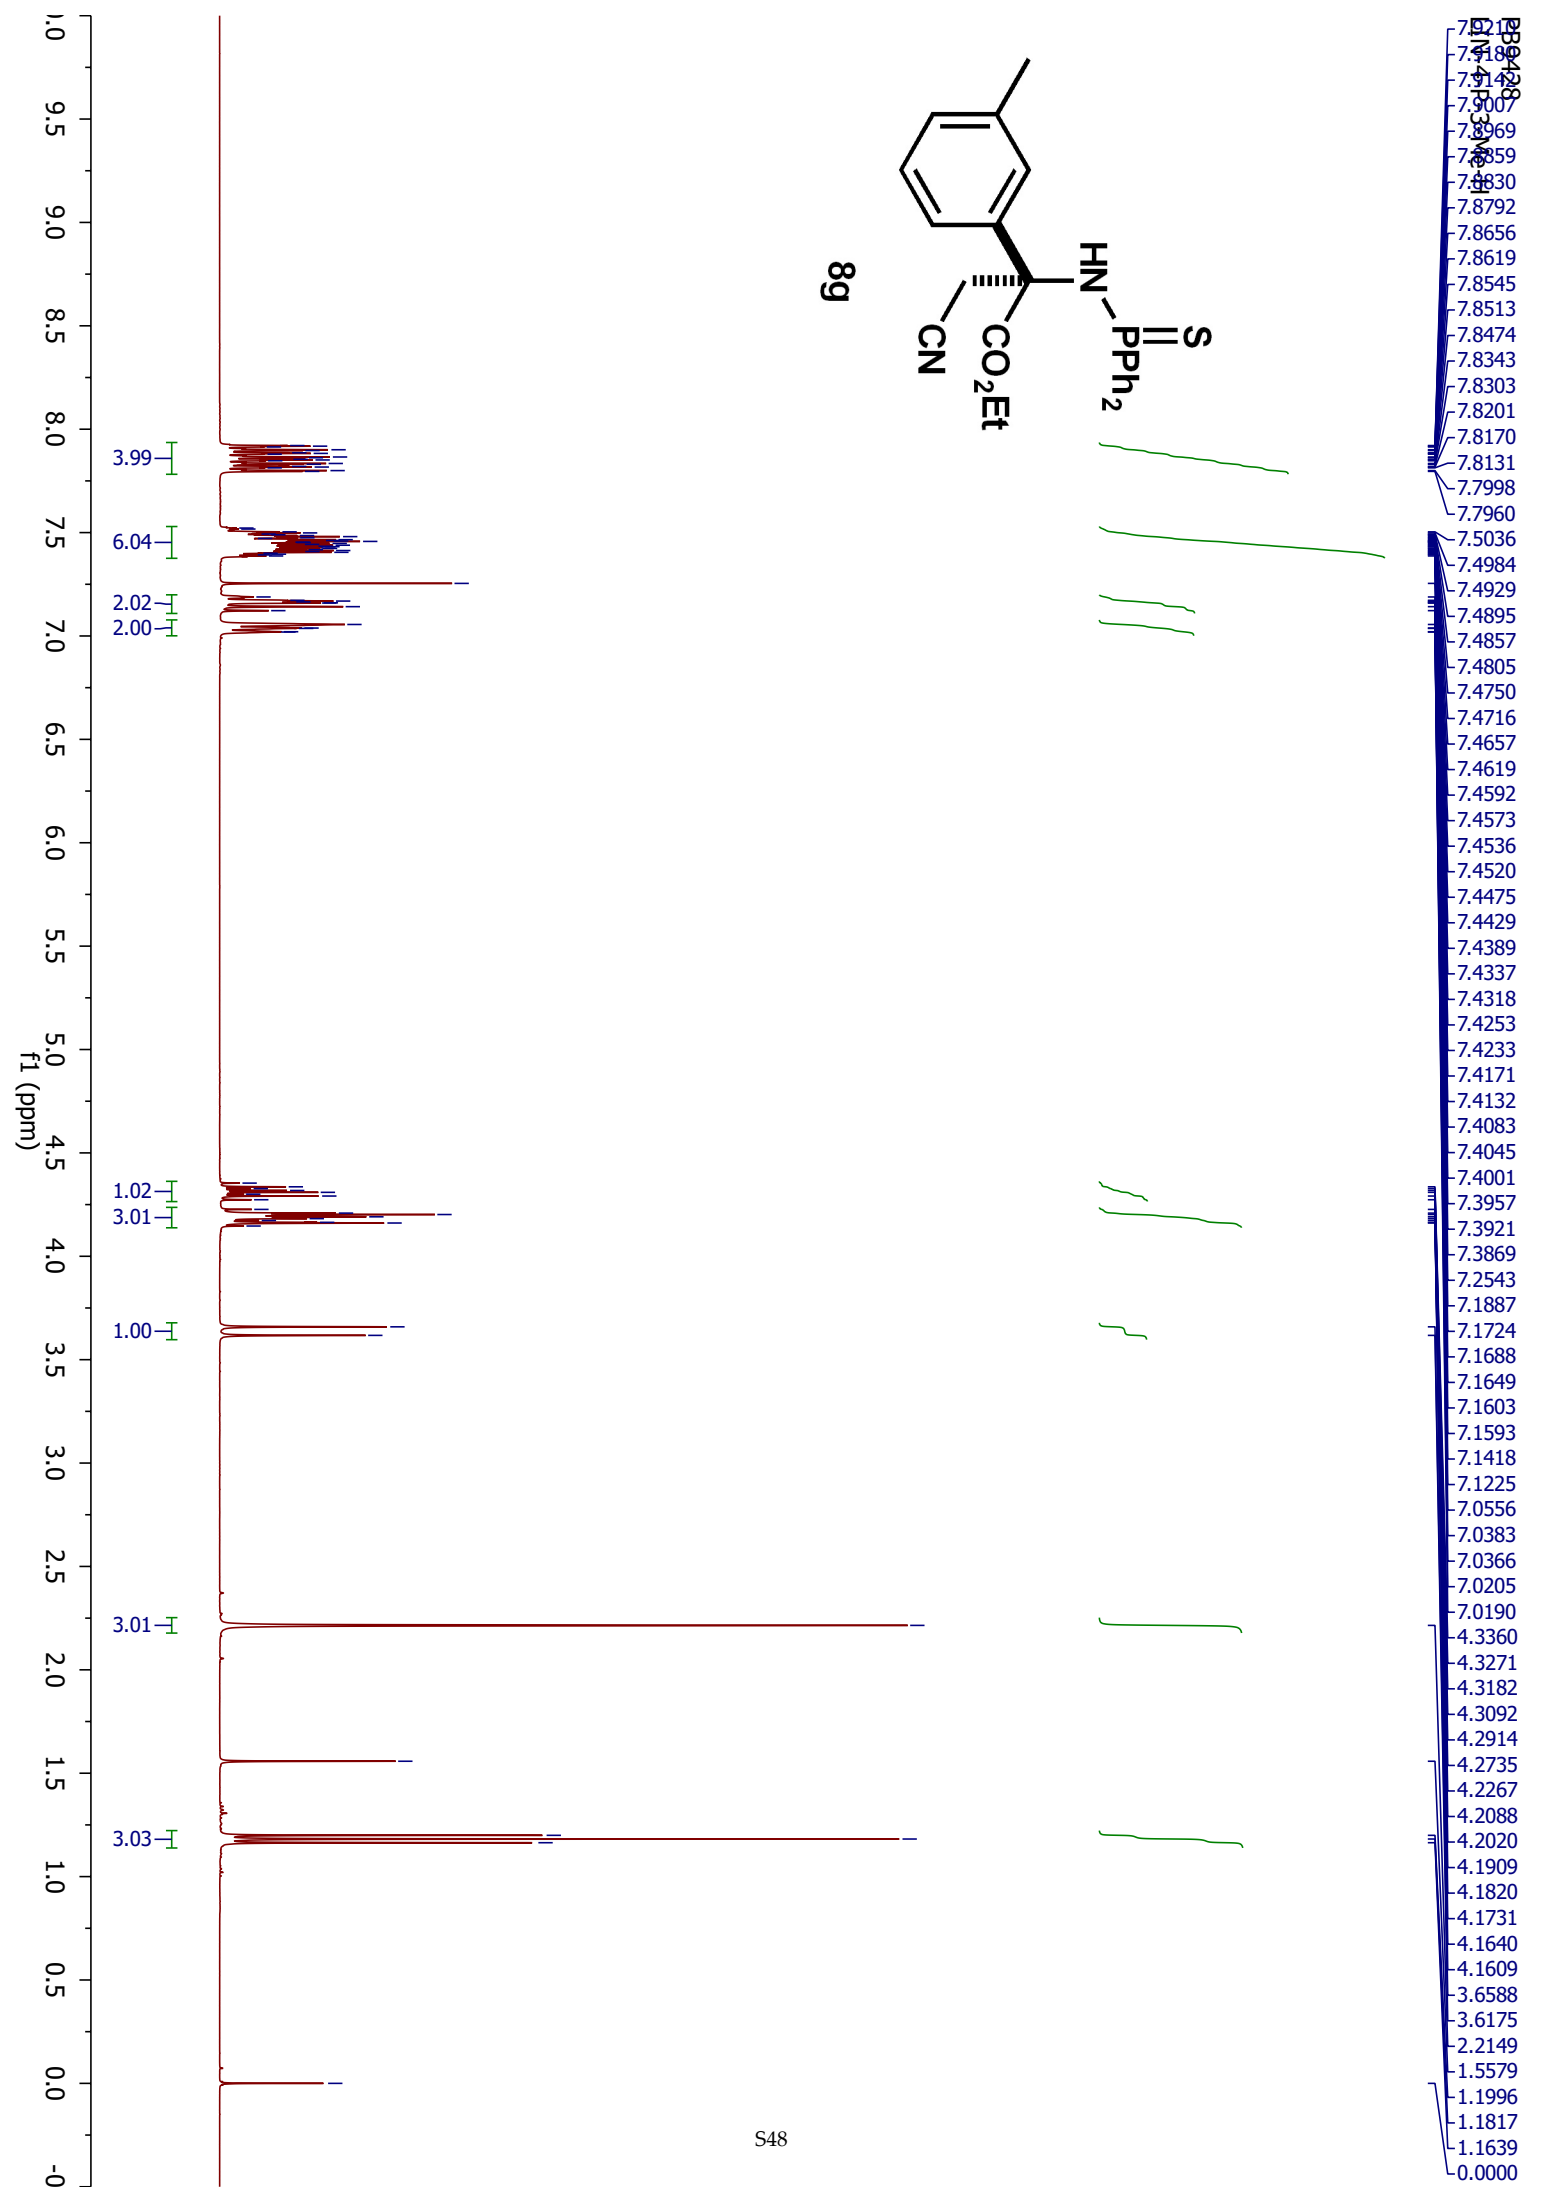



- 171.7807
- 171.7176
- 138.3704
- 137.3572
- 137.2905
- 136.3976
- 134.5329
- 132.1553
- 132.0405
- 131.8113
- 131.7792
- 131.7468
- 130.7486
- 130.6345
- 129.6297
- 128.7224
- 128.5903
- 128.4946
- 128.2380
- 128.1052
- 126.7185
- 122.9684
- 117.1176

- 77.3179
- 77.0003
- 76.6825

- 64.9632
- 63.0156

- 28.1435

- 21.4507

- 13.6666

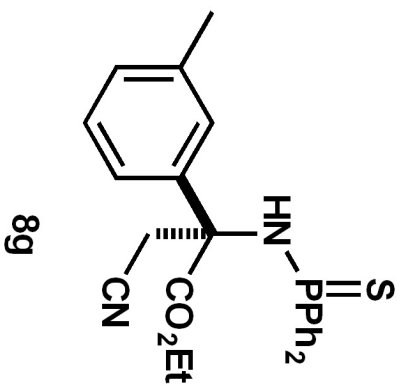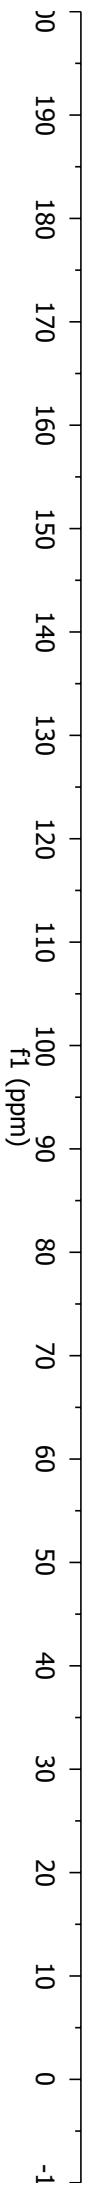

PB9427  
 LIN-4-184  
 7.9280  
 7.9254  
 7.9178  
 7.9142  
 7.8931  
 7.8904  
 7.8728  
 7.8691  
 7.8658  
 7.8626  
 7.8455  
 7.8416  
 7.8313  
 7.8283  
 7.8111  
 7.8072  
 7.5046  
 7.4908  
 7.4863  
 7.4673  
 7.4583  
 7.4483  
 7.4397  
 7.4312  
 7.4226  
 7.4125  
 7.4038  
 7.2547  
 7.2376  
 7.2215  
 7.2167  
 7.0403  
 7.0202  
 4.3386  
 4.3208  
 4.3029  
 4.2940  
 4.2761  
 4.2583  
 4.2205  
 4.2027  
 4.1848  
 4.1759  
 4.1580  
 4.1281  
 4.1197  
 4.0783  
 3.6614  
 3.6199  
 2.2723  
 1.5556  
 1.1922  
 1.1743  
 1.1564  
 -0.0000

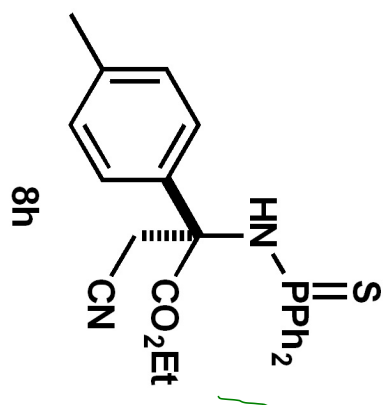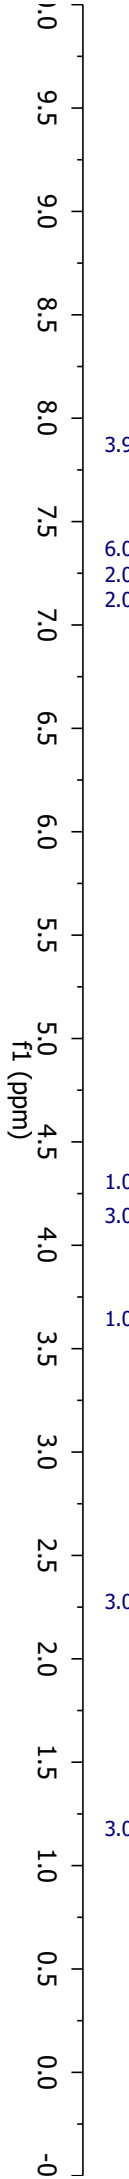

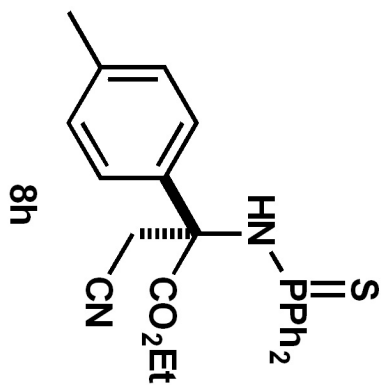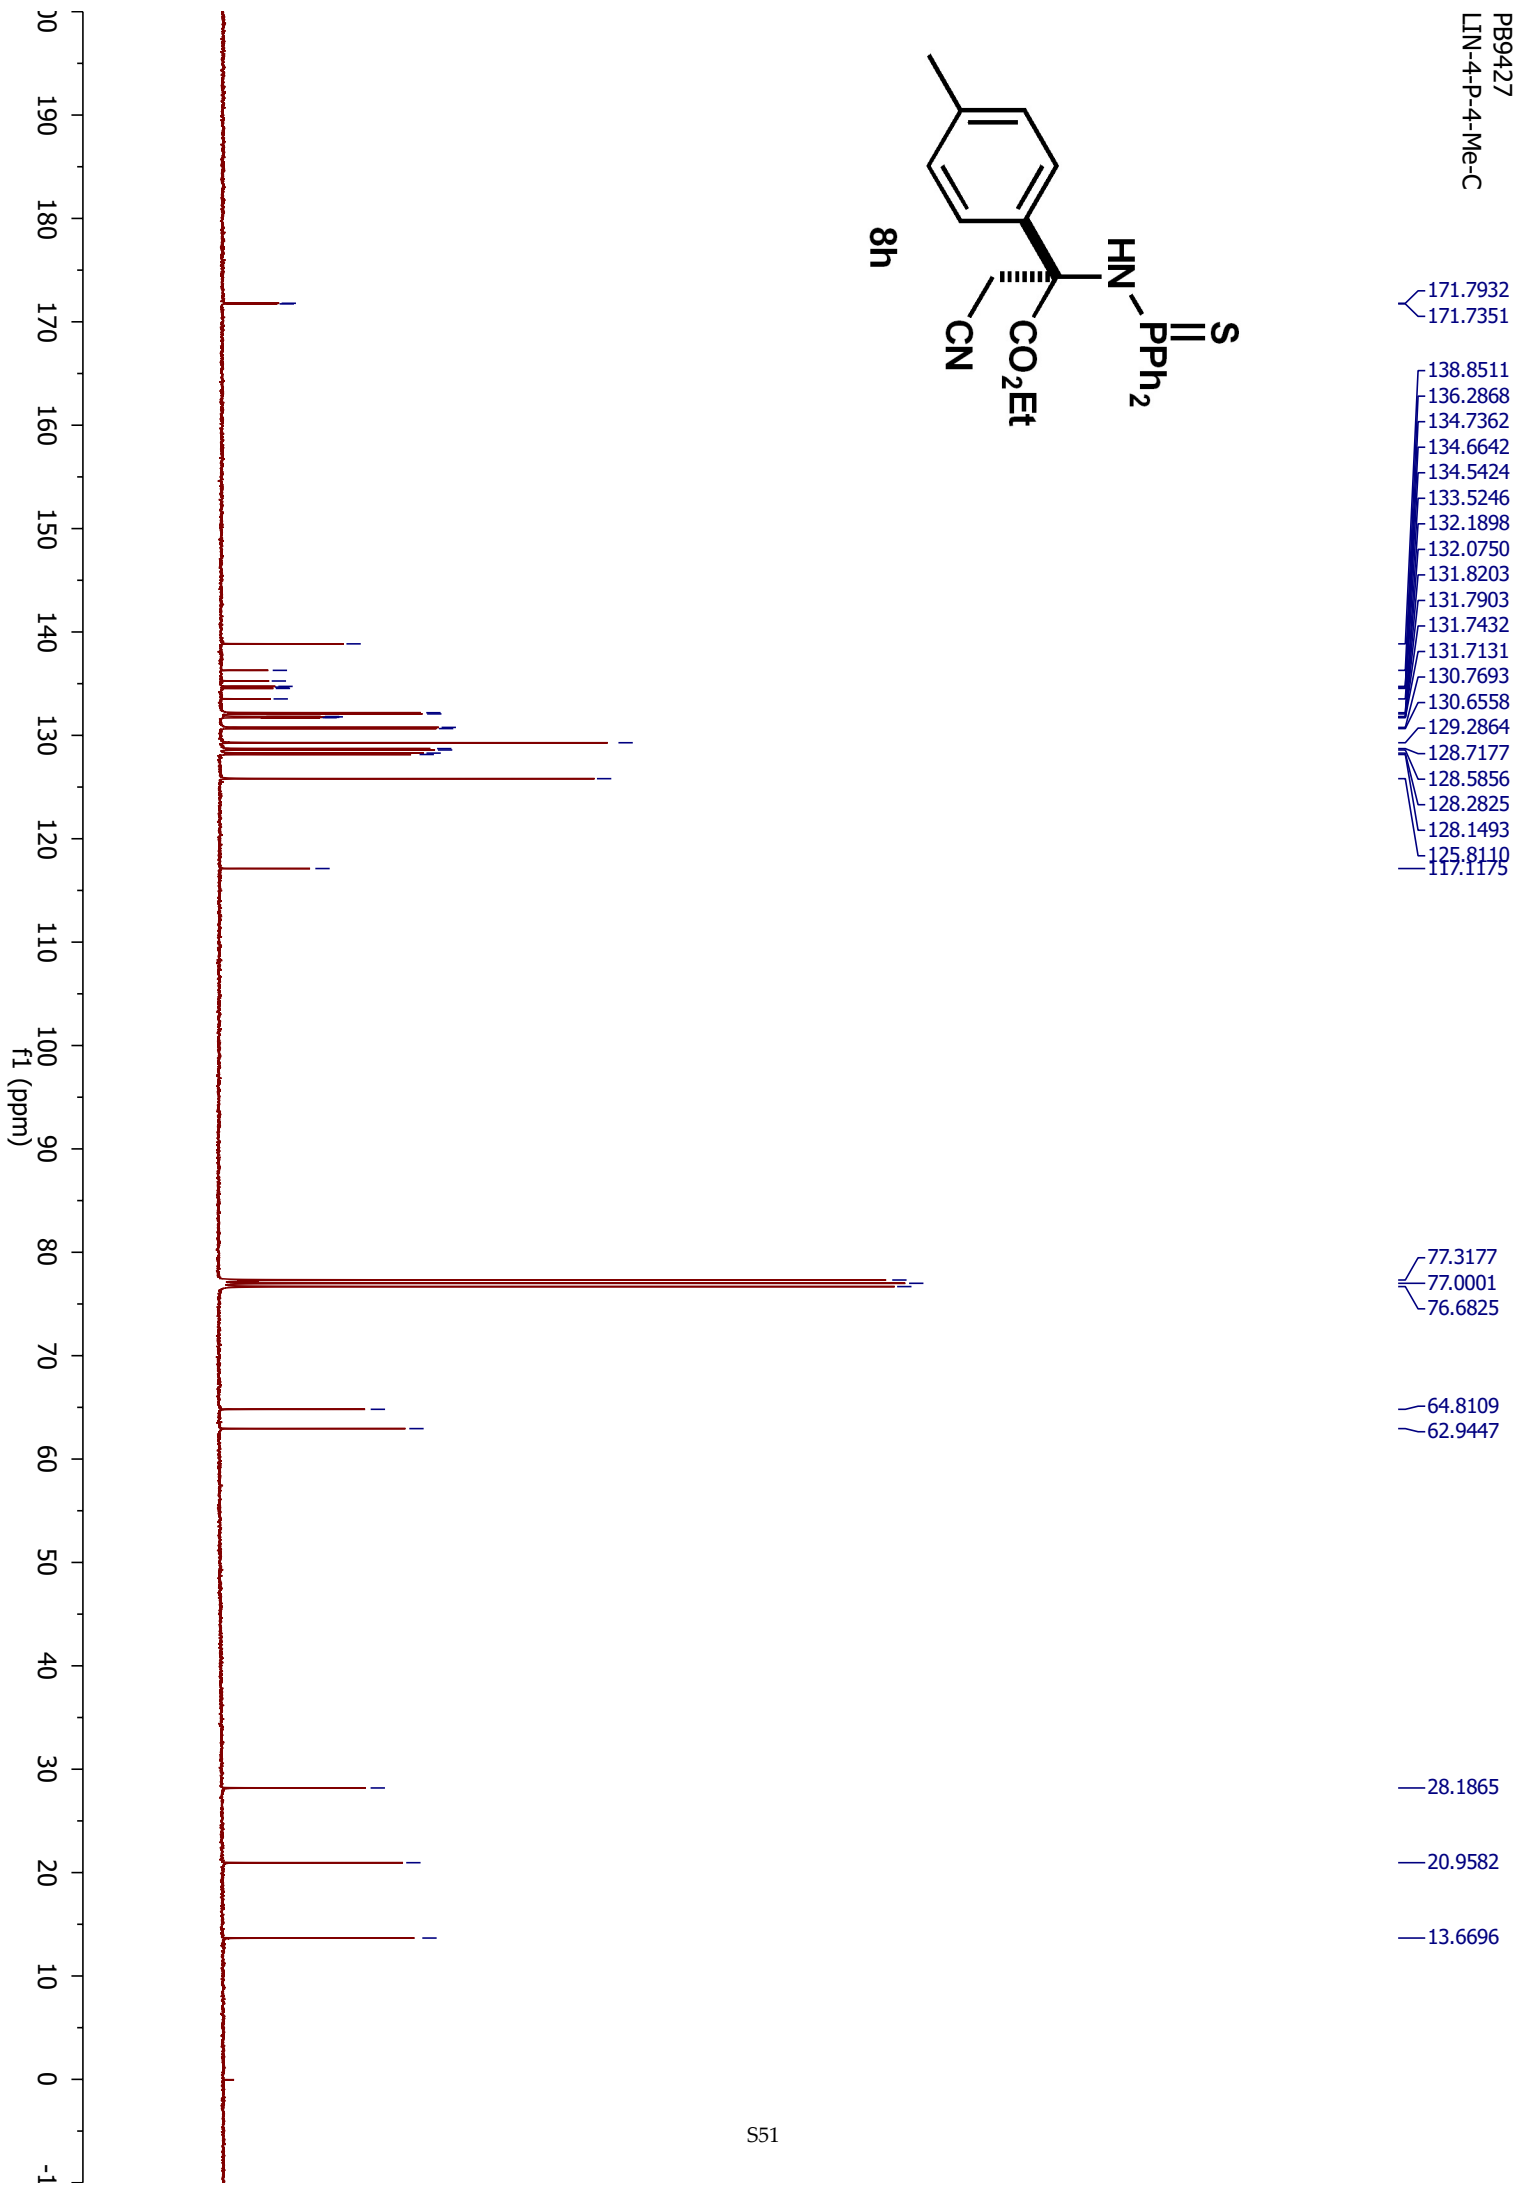

PB0464  
 Line 40  
 7.91448  
 7.91221  
 7.89722  
 7.89335  
 7.88998  
 7.85701  
 7.8621  
 7.8584  
 7.8500  
 7.8471  
 7.8351  
 7.8300  
 7.8261  
 7.8157  
 7.8129  
 7.8008  
 7.7956  
 7.7918  
 7.4818  
 7.4618  
 7.4530  
 7.4474  
 7.4433  
 7.4387  
 7.4345  
 7.4126  
 7.3932  
 7.3847  
 7.2801  
 7.2573  
 7.2341  
 7.2283  
 7.2121  
 4.3406  
 4.3317  
 4.3227  
 4.3138  
 4.2959  
 4.2781  
 4.2380  
 4.2201  
 4.2112  
 4.2025  
 4.1933  
 4.1844  
 4.1754  
 4.1613  
 4.1516  
 4.1386  
 3.6661  
 3.6247  
 1.5510  
 1.2477  
 1.2134  
 1.1955  
 1.1777  
 -0.0000

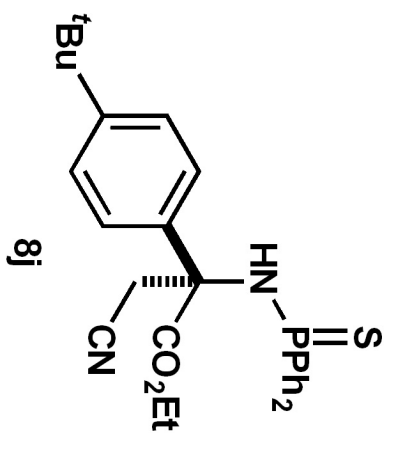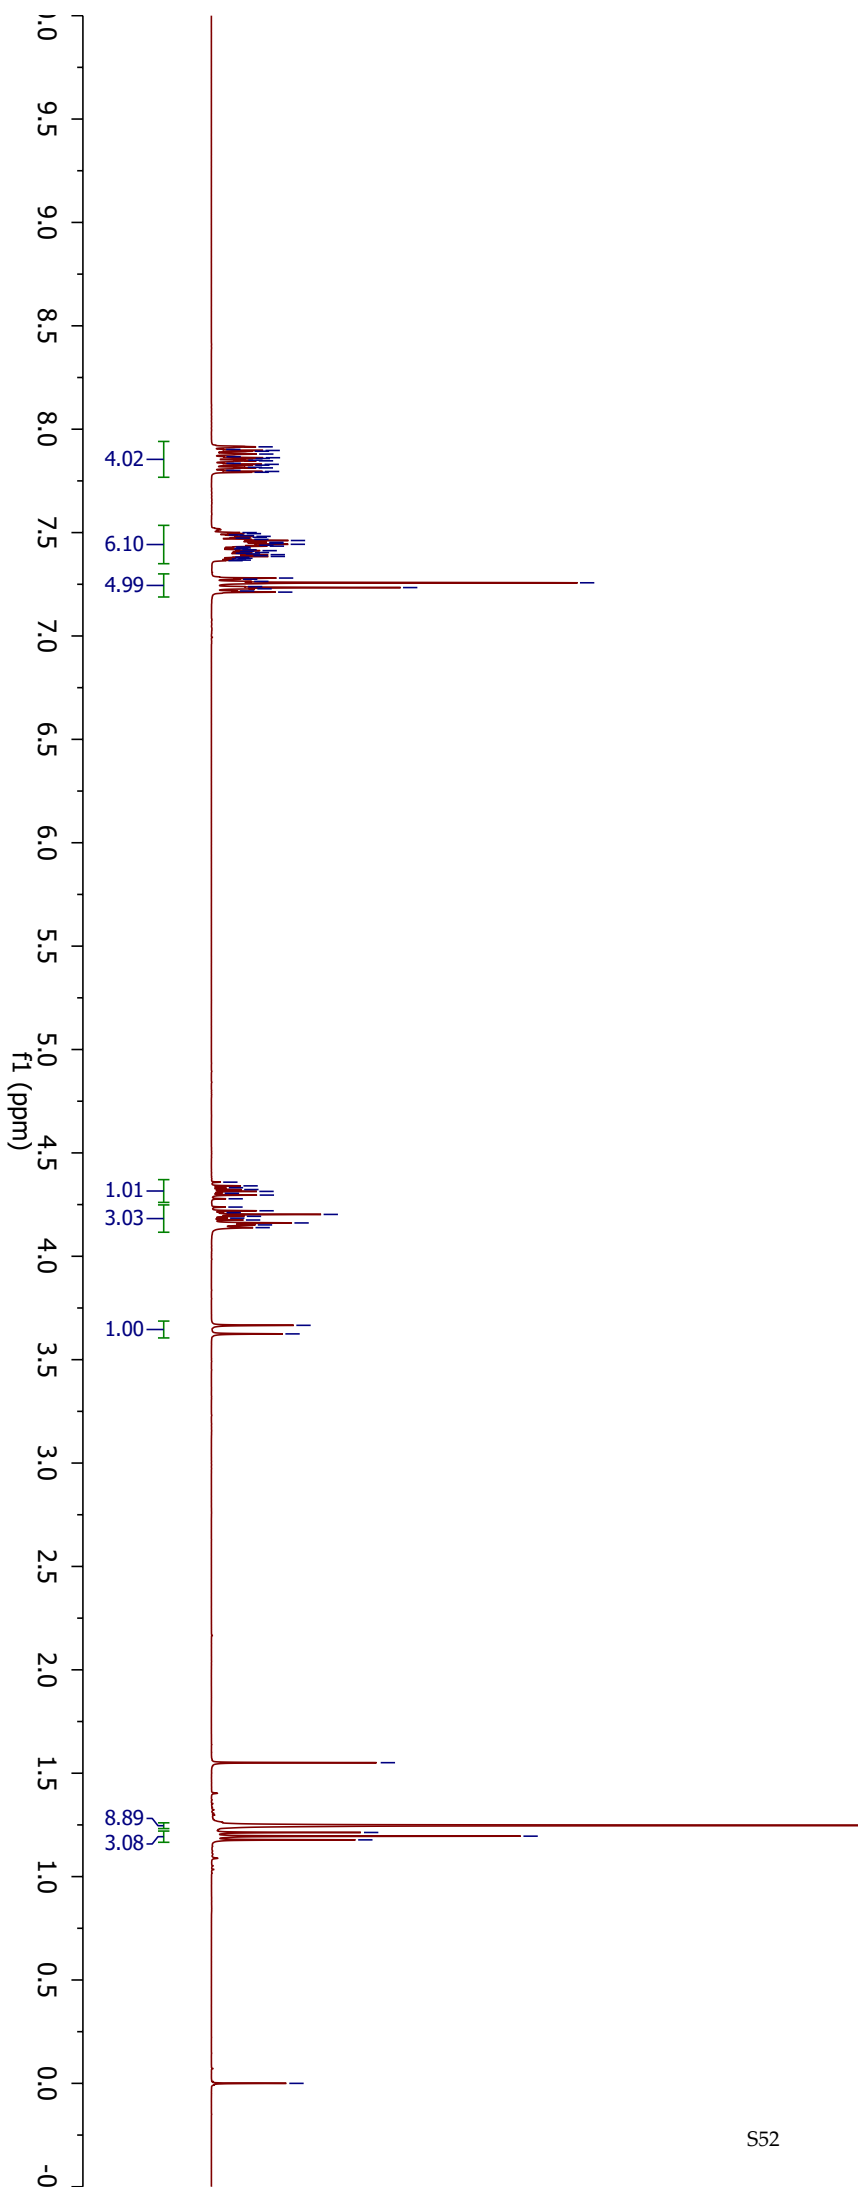

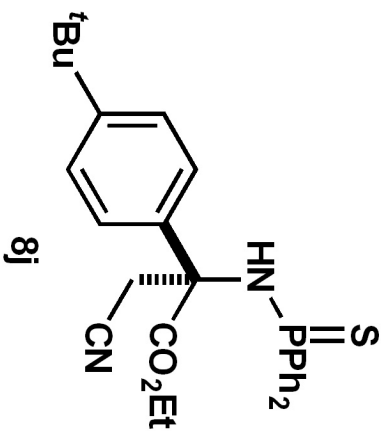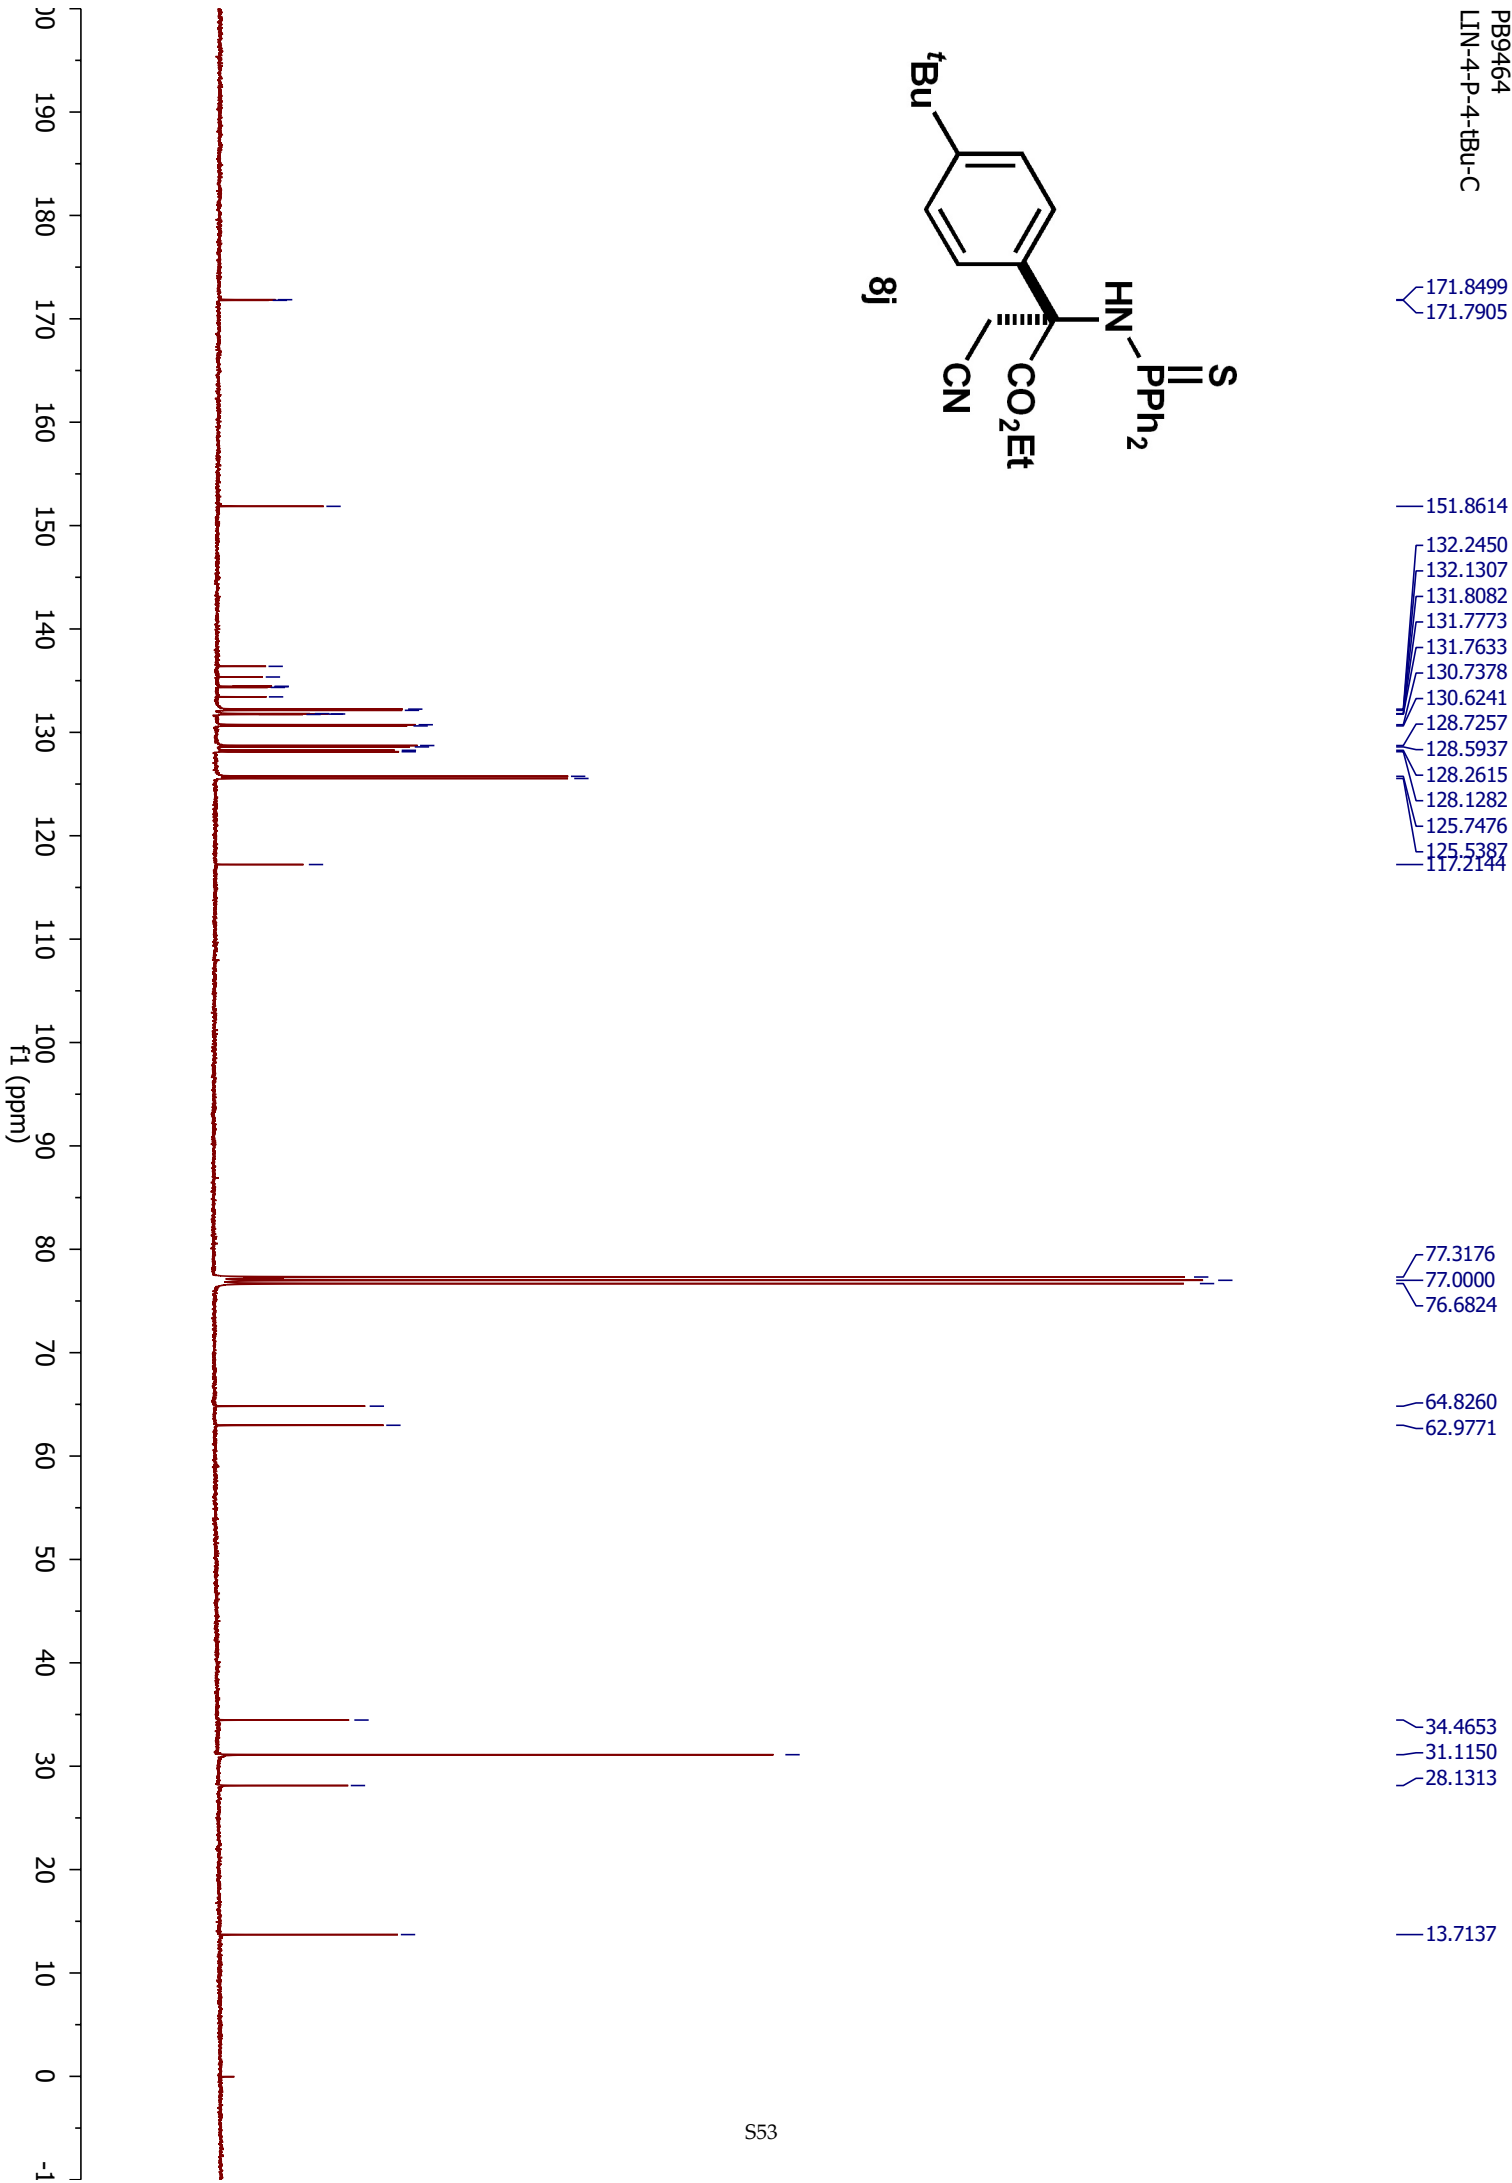

PB9430  
LIN-4-P-3,5-Me<sub>2</sub>-1-  
S-1

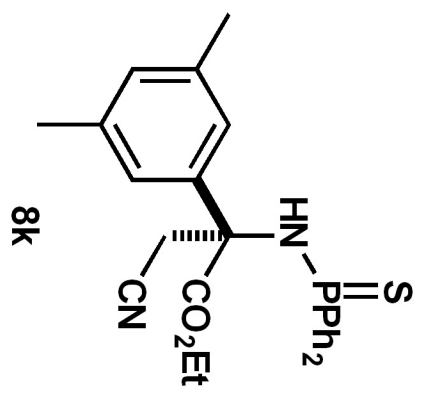

- 7.9332
- 7.8859
- 7.8821
- 7.8683
- 7.8508
- 7.8468
- 7.8437
- 7.8408
- 7.8236
- 7.8196
- 7.8065
- 7.7892
- 7.7853
- 7.4629
- 7.4428
- 7.4256
- 7.4170
- 7.2542
- 6.8850
- 6.8224
- 4.3605
- 4.3426
- 4.3337
- 4.3248
- 4.3158
- 4.3070
- 4.2980
- 4.2802
- 4.2305
- 4.2204
- 4.2058
- 4.1966
- 4.1888
- 4.1789
- 4.1610
- 4.1432
- 3.6343
- 3.5930
- 2.1938
- 1.5616
- 1.2063
- 1.1885
- 1.1707
- 0.0000

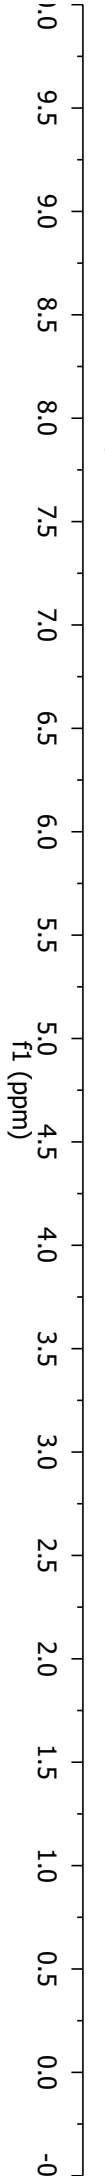

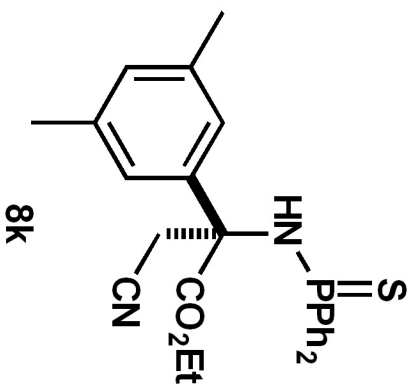

- 171.8715
- 171.8062
- 138.1646
- 137.1307
- 137.0676
- 136.5130
- 135.4790
- 134.5229
- 133.5087
- 132.1617
- 132.0465
- 131.7684
- 131.7371
- 131.6925
- 130.7328
- 130.6192
- 130.4602
- 128.7036
- 128.5719
- 128.1143
- 127.9813
- 123.7875
- 117.2045

- 77.3179
- 77.0002
- 76.6825

- 64.9183
- 62.9937

- 28.1427

- 21.3501

- 13.6760



PC2299  
 LIN-48-38-38-01  
 7.8599  
 7.8534  
 7.8557  
 7.8491  
 7.8425  
 7.8382  
 7.8359  
 7.8318  
 7.8285  
 7.8256  
 7.8211  
 7.8184  
 7.8142  
 7.8082  
 7.8044  
 7.8008  
 7.7970  
 7.4672  
 7.4589  
 7.4483  
 7.4439  
 7.4400  
 7.4258  
 7.4229  
 7.4201  
 7.3746  
 7.3661  
 7.3591  
 7.3555  
 7.3508  
 7.3470  
 7.2794  
 7.2758  
 7.2695  
 7.2658  
 7.2547  
 4.3406  
 4.3227  
 4.3138  
 4.2959  
 4.2797  
 4.2384  
 4.2066  
 4.1888  
 4.1798  
 4.1619  
 4.1415  
 4.1260  
 3.7261  
 3.6846  
 1.5507  
 1.2649  
 1.1720  
 1.1541  
 1.1363  
 0.0000

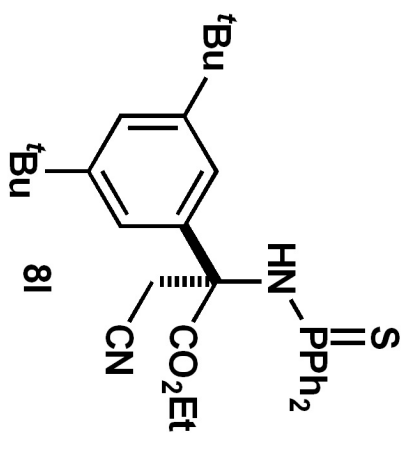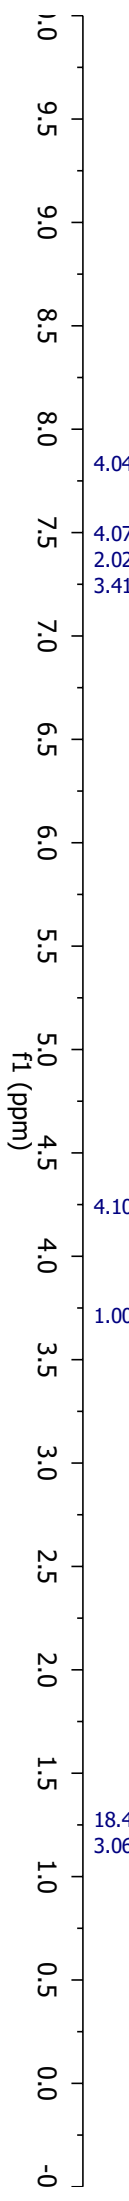



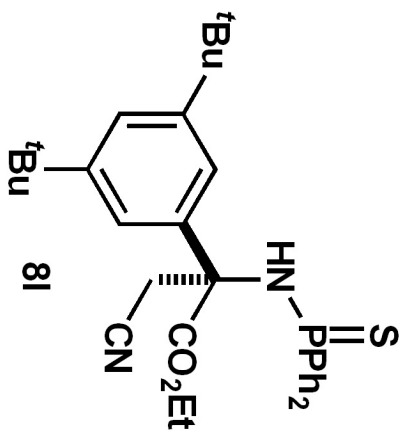

171.8558  
171.7949

151.0575

131.9776  
131.8629  
131.7116  
131.6873  
130.8464  
130.7333  
128.6777  
128.5458  
128.3056  
128.1728  
125.0271  
120.5506  
117.4783

77.3569  
77.0394  
76.7218

65.7166  
62.7905

35.0001  
31.3279  
28.1420

13.7728



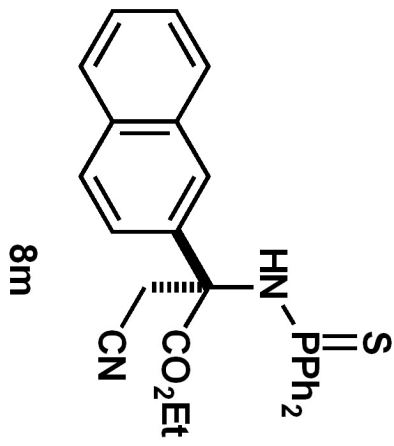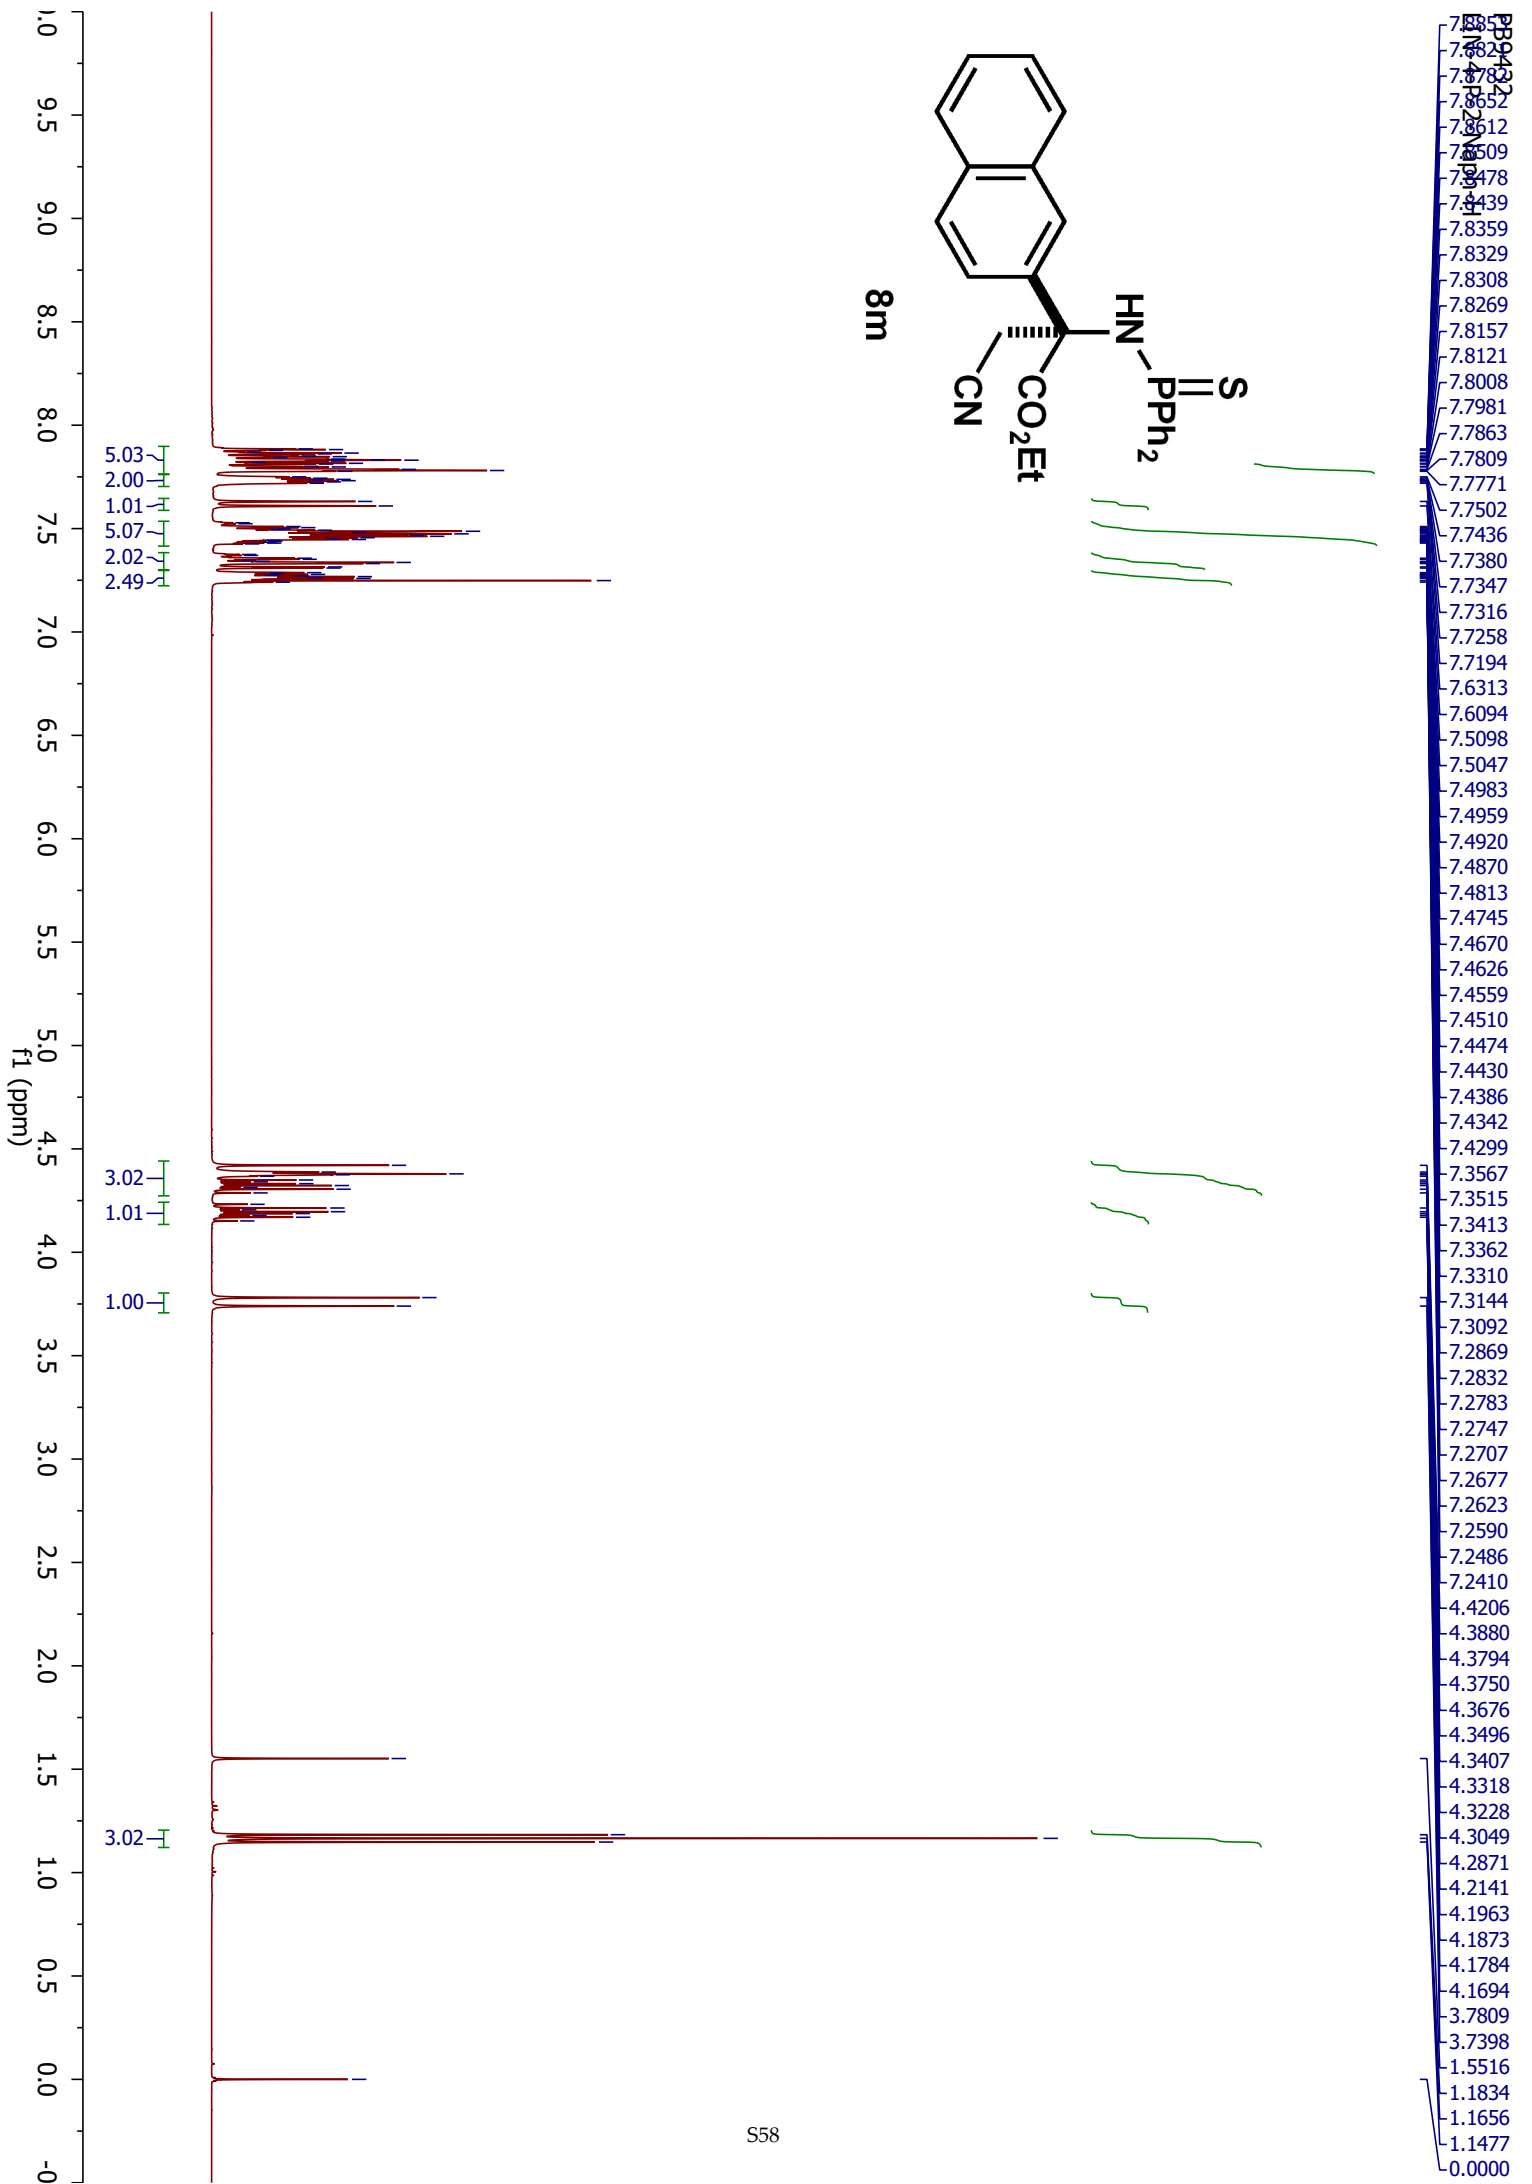

171.6959  
171.6268

132.9561  
132.5100  
132.0485  
131.9335  
131.8646  
131.8348  
131.6309  
130.7830  
130.6691  
128.7580  
128.6257  
128.4916  
128.4371  
128.1114  
127.9784  
127.3812  
126.9380  
126.5390  
125.7805  
123.2388  
117.0943

77.3178  
77.0002  
76.6825

65.1374  
63.1985

28.0577

13.6805

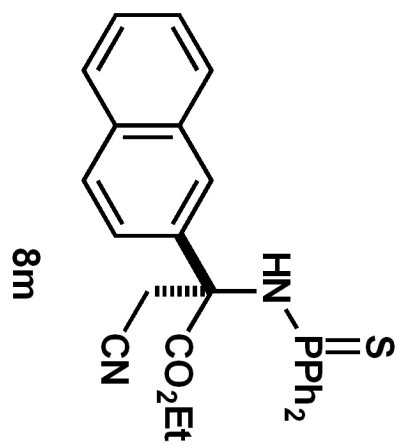

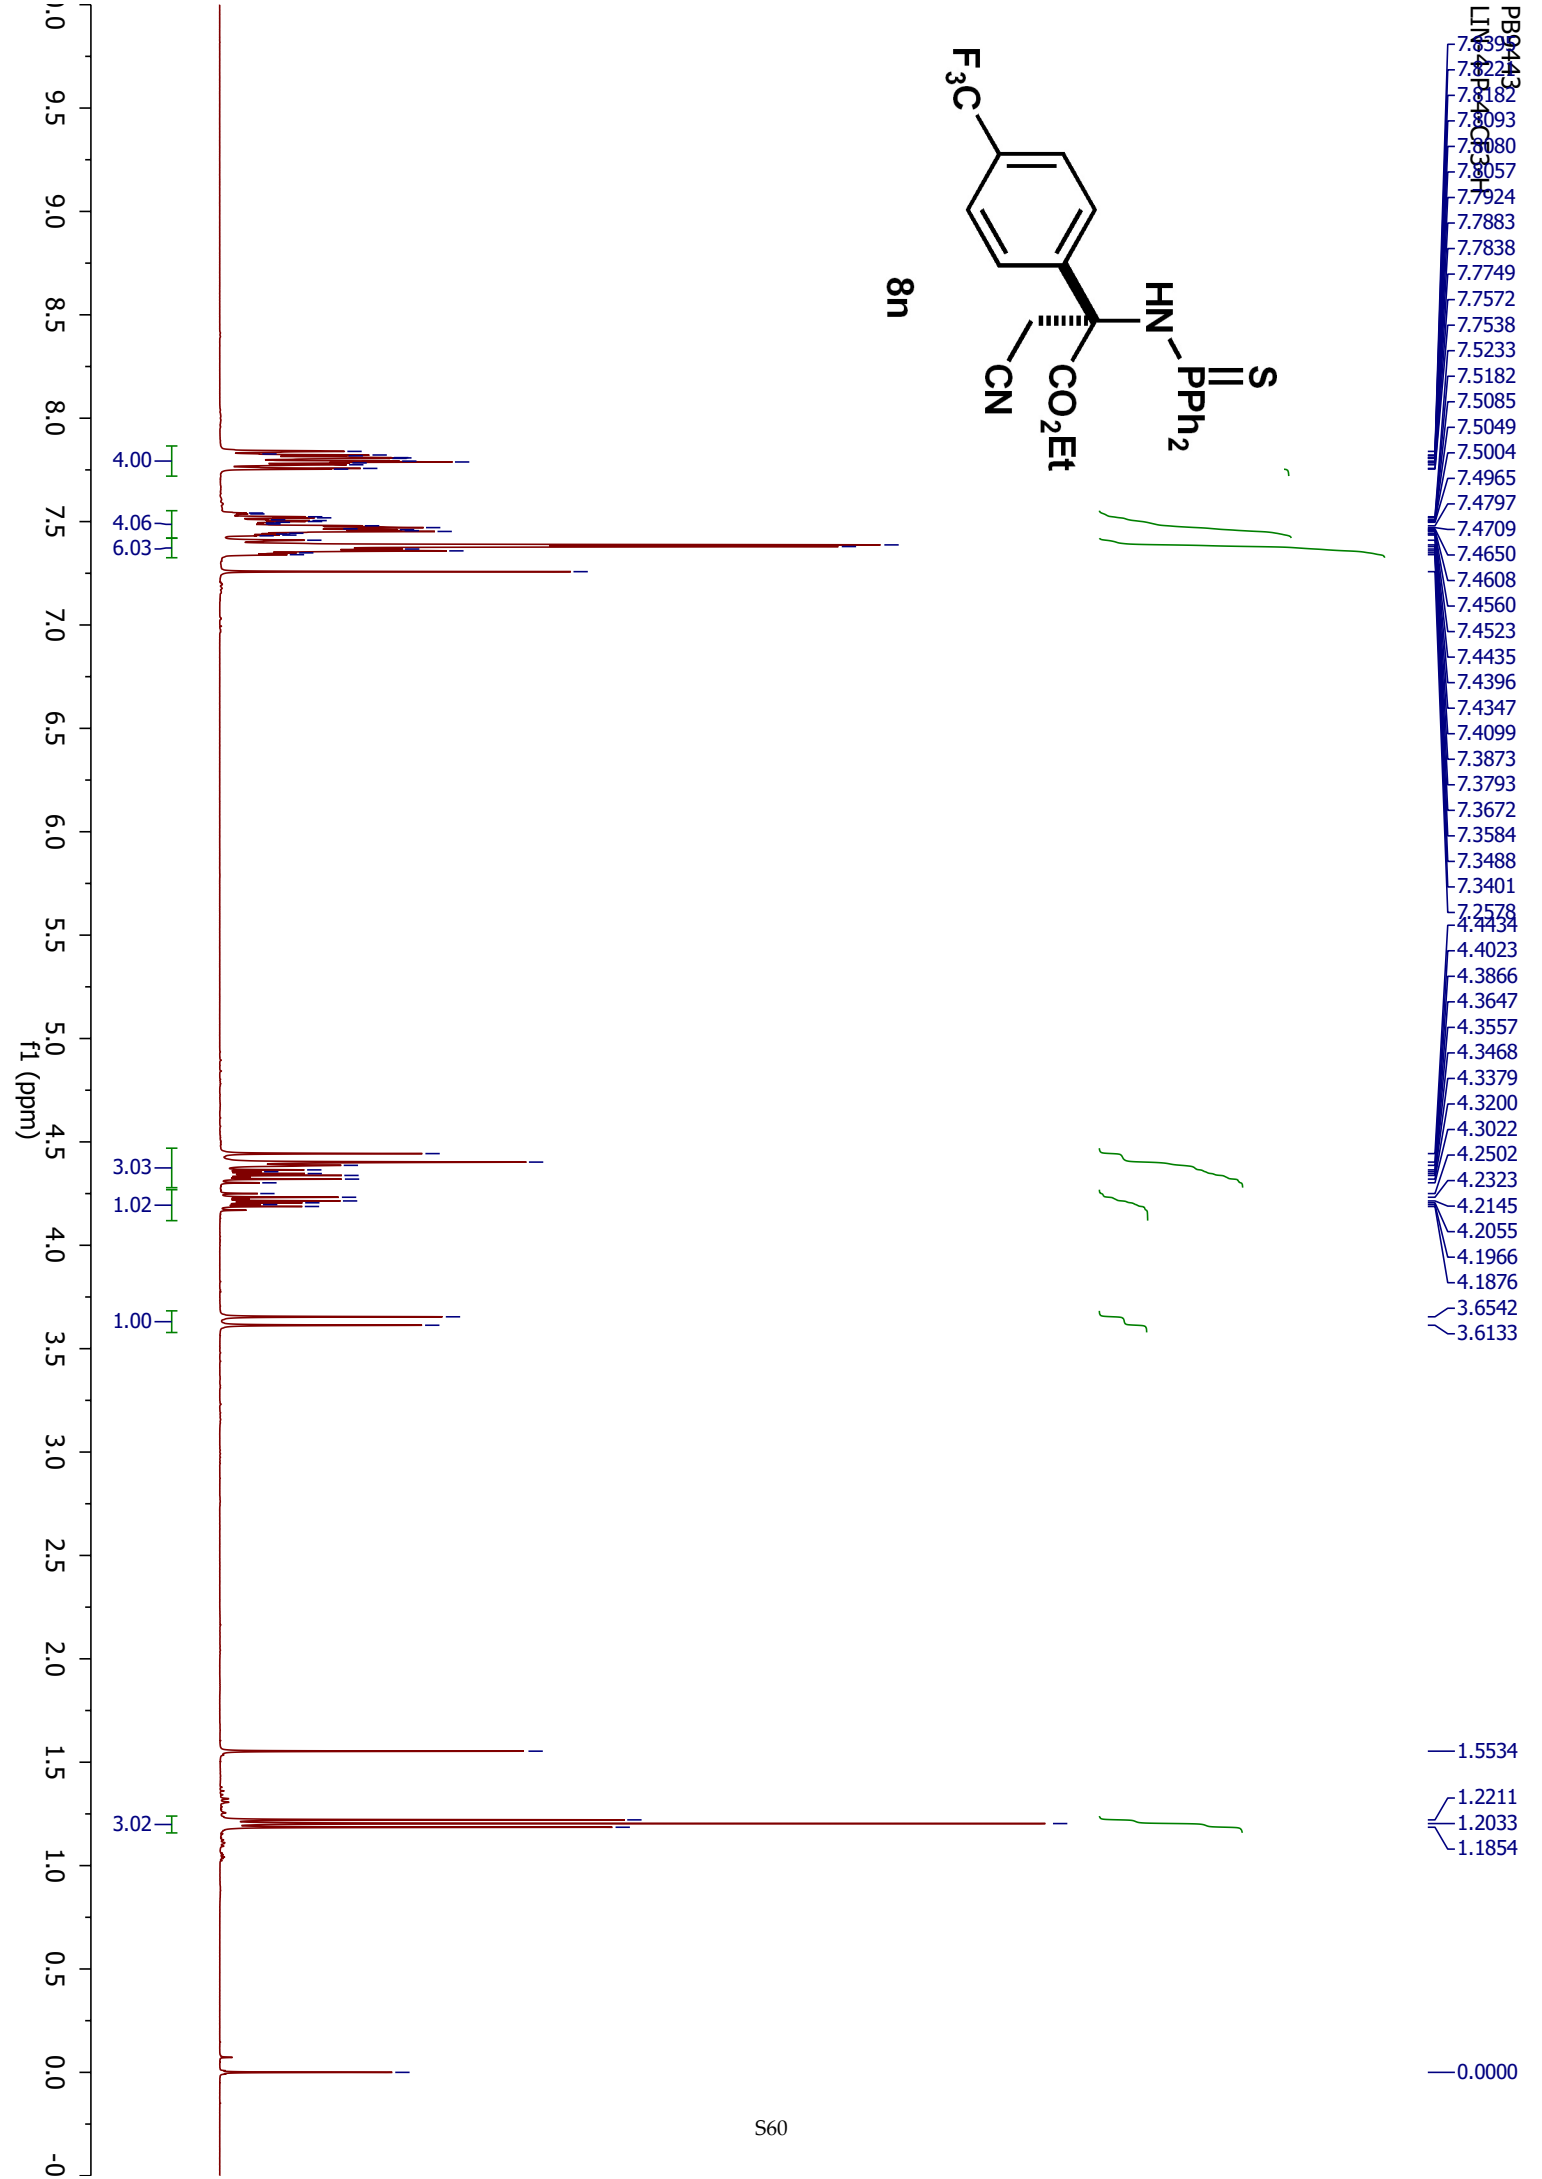

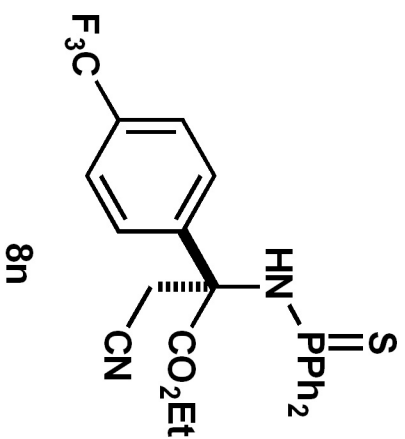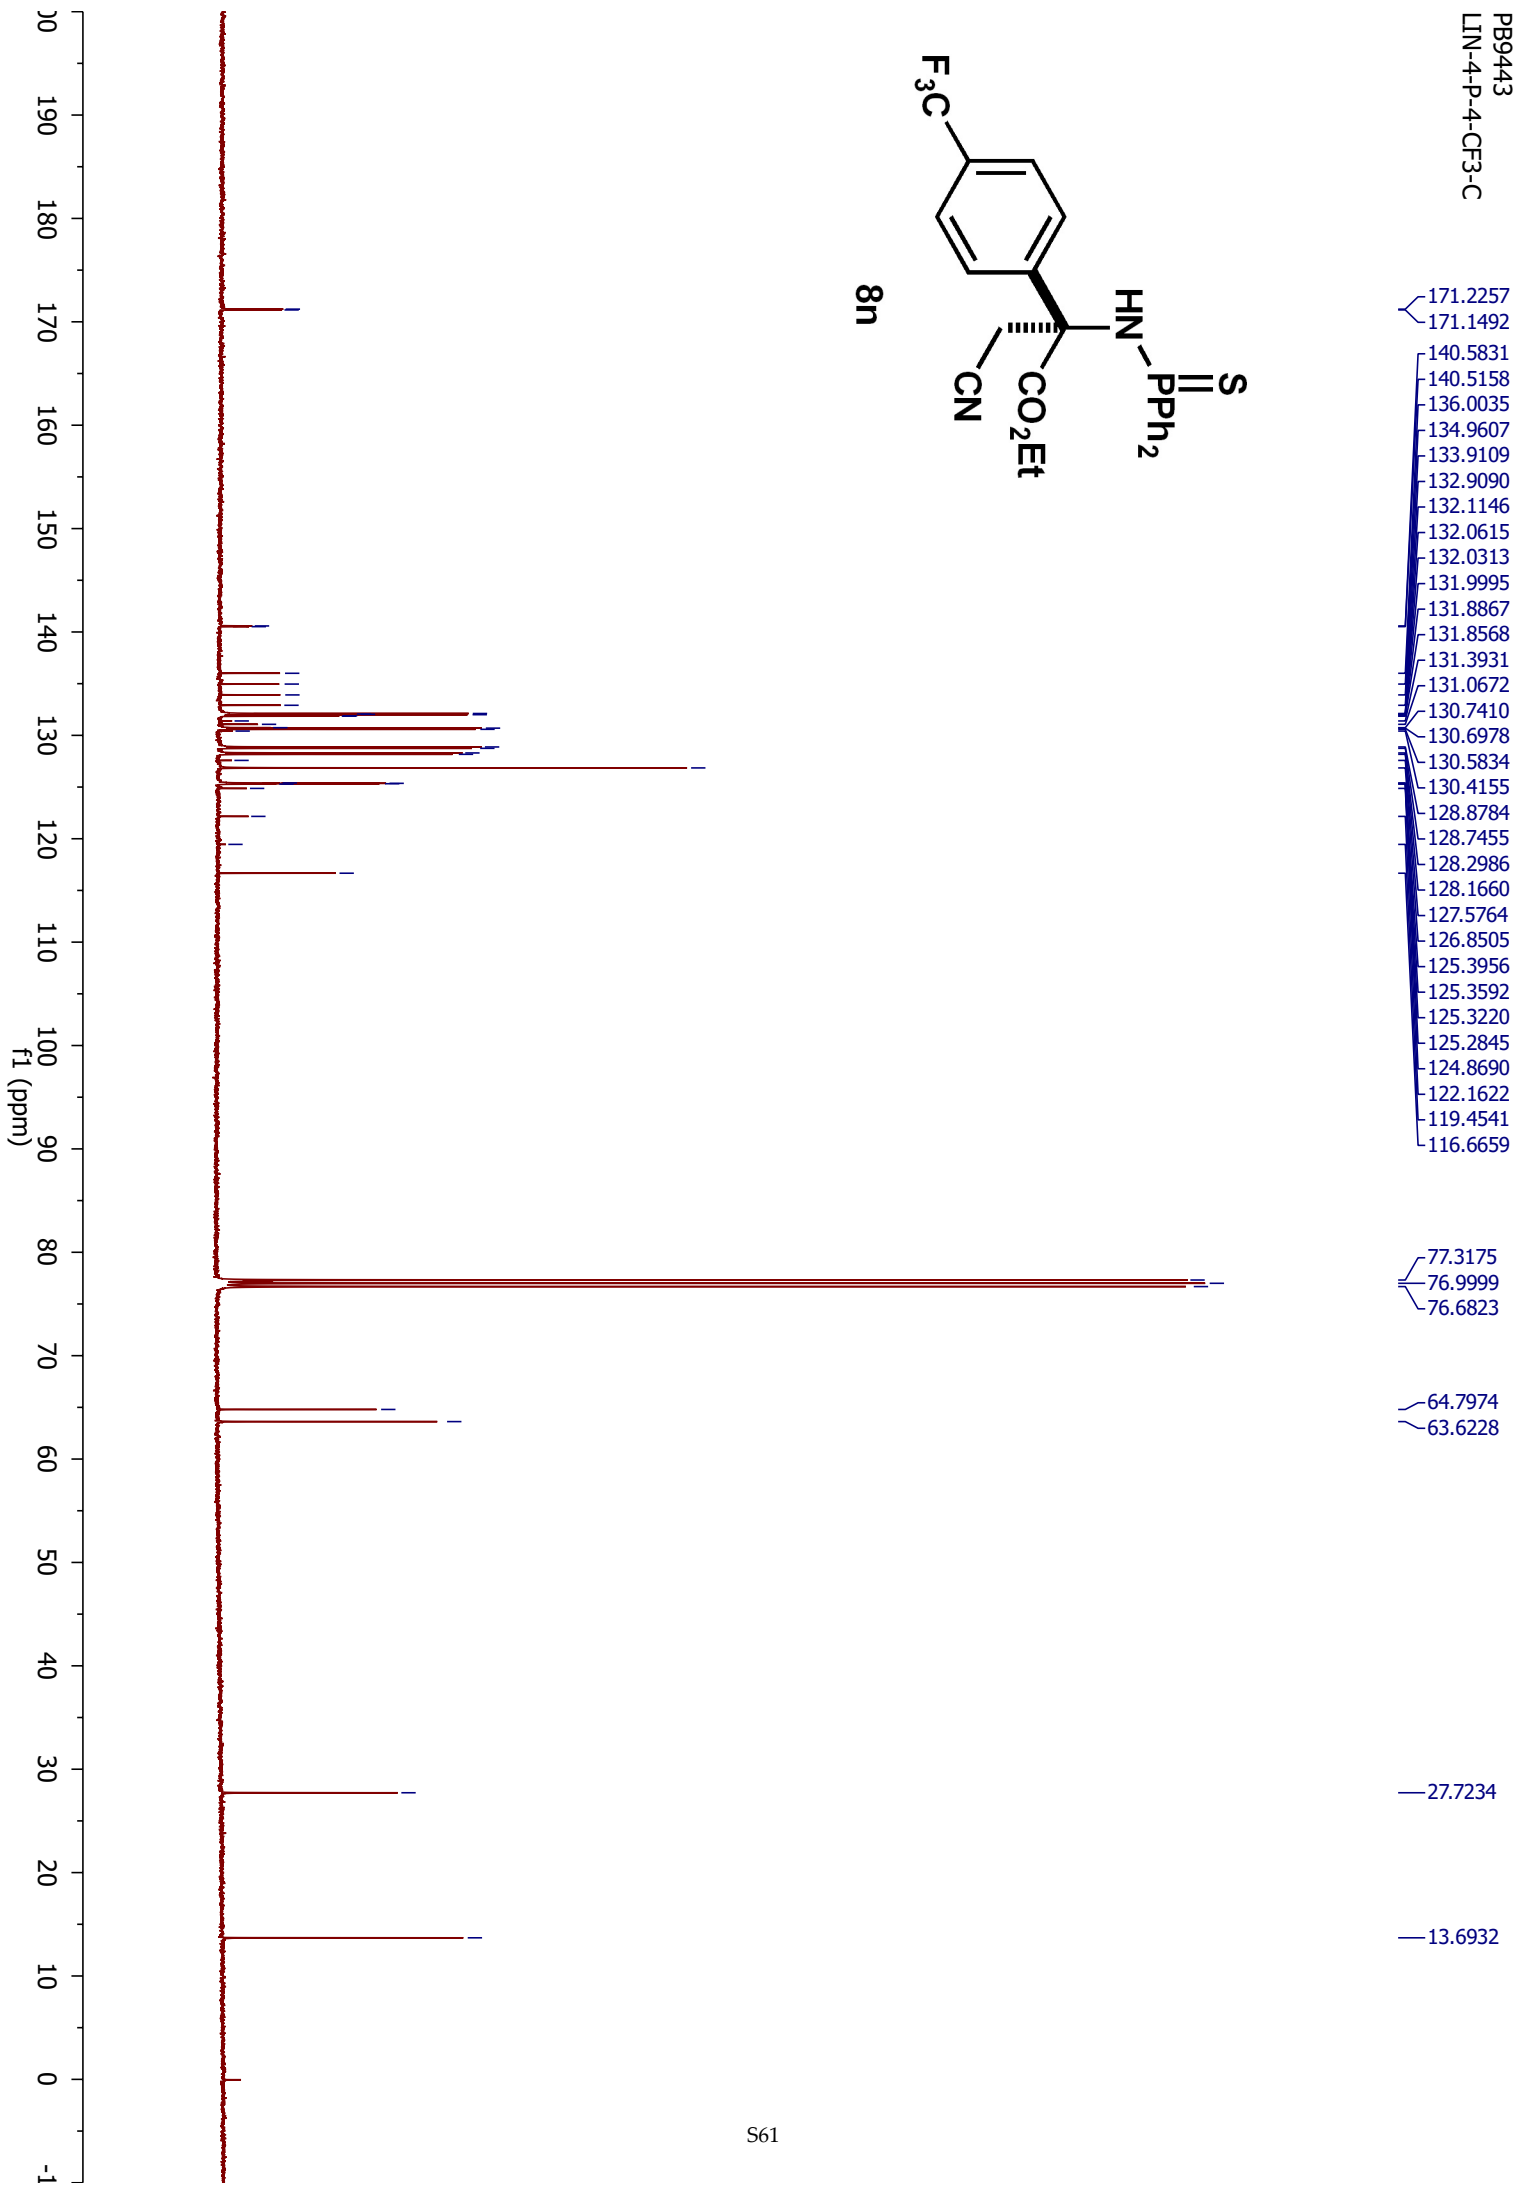

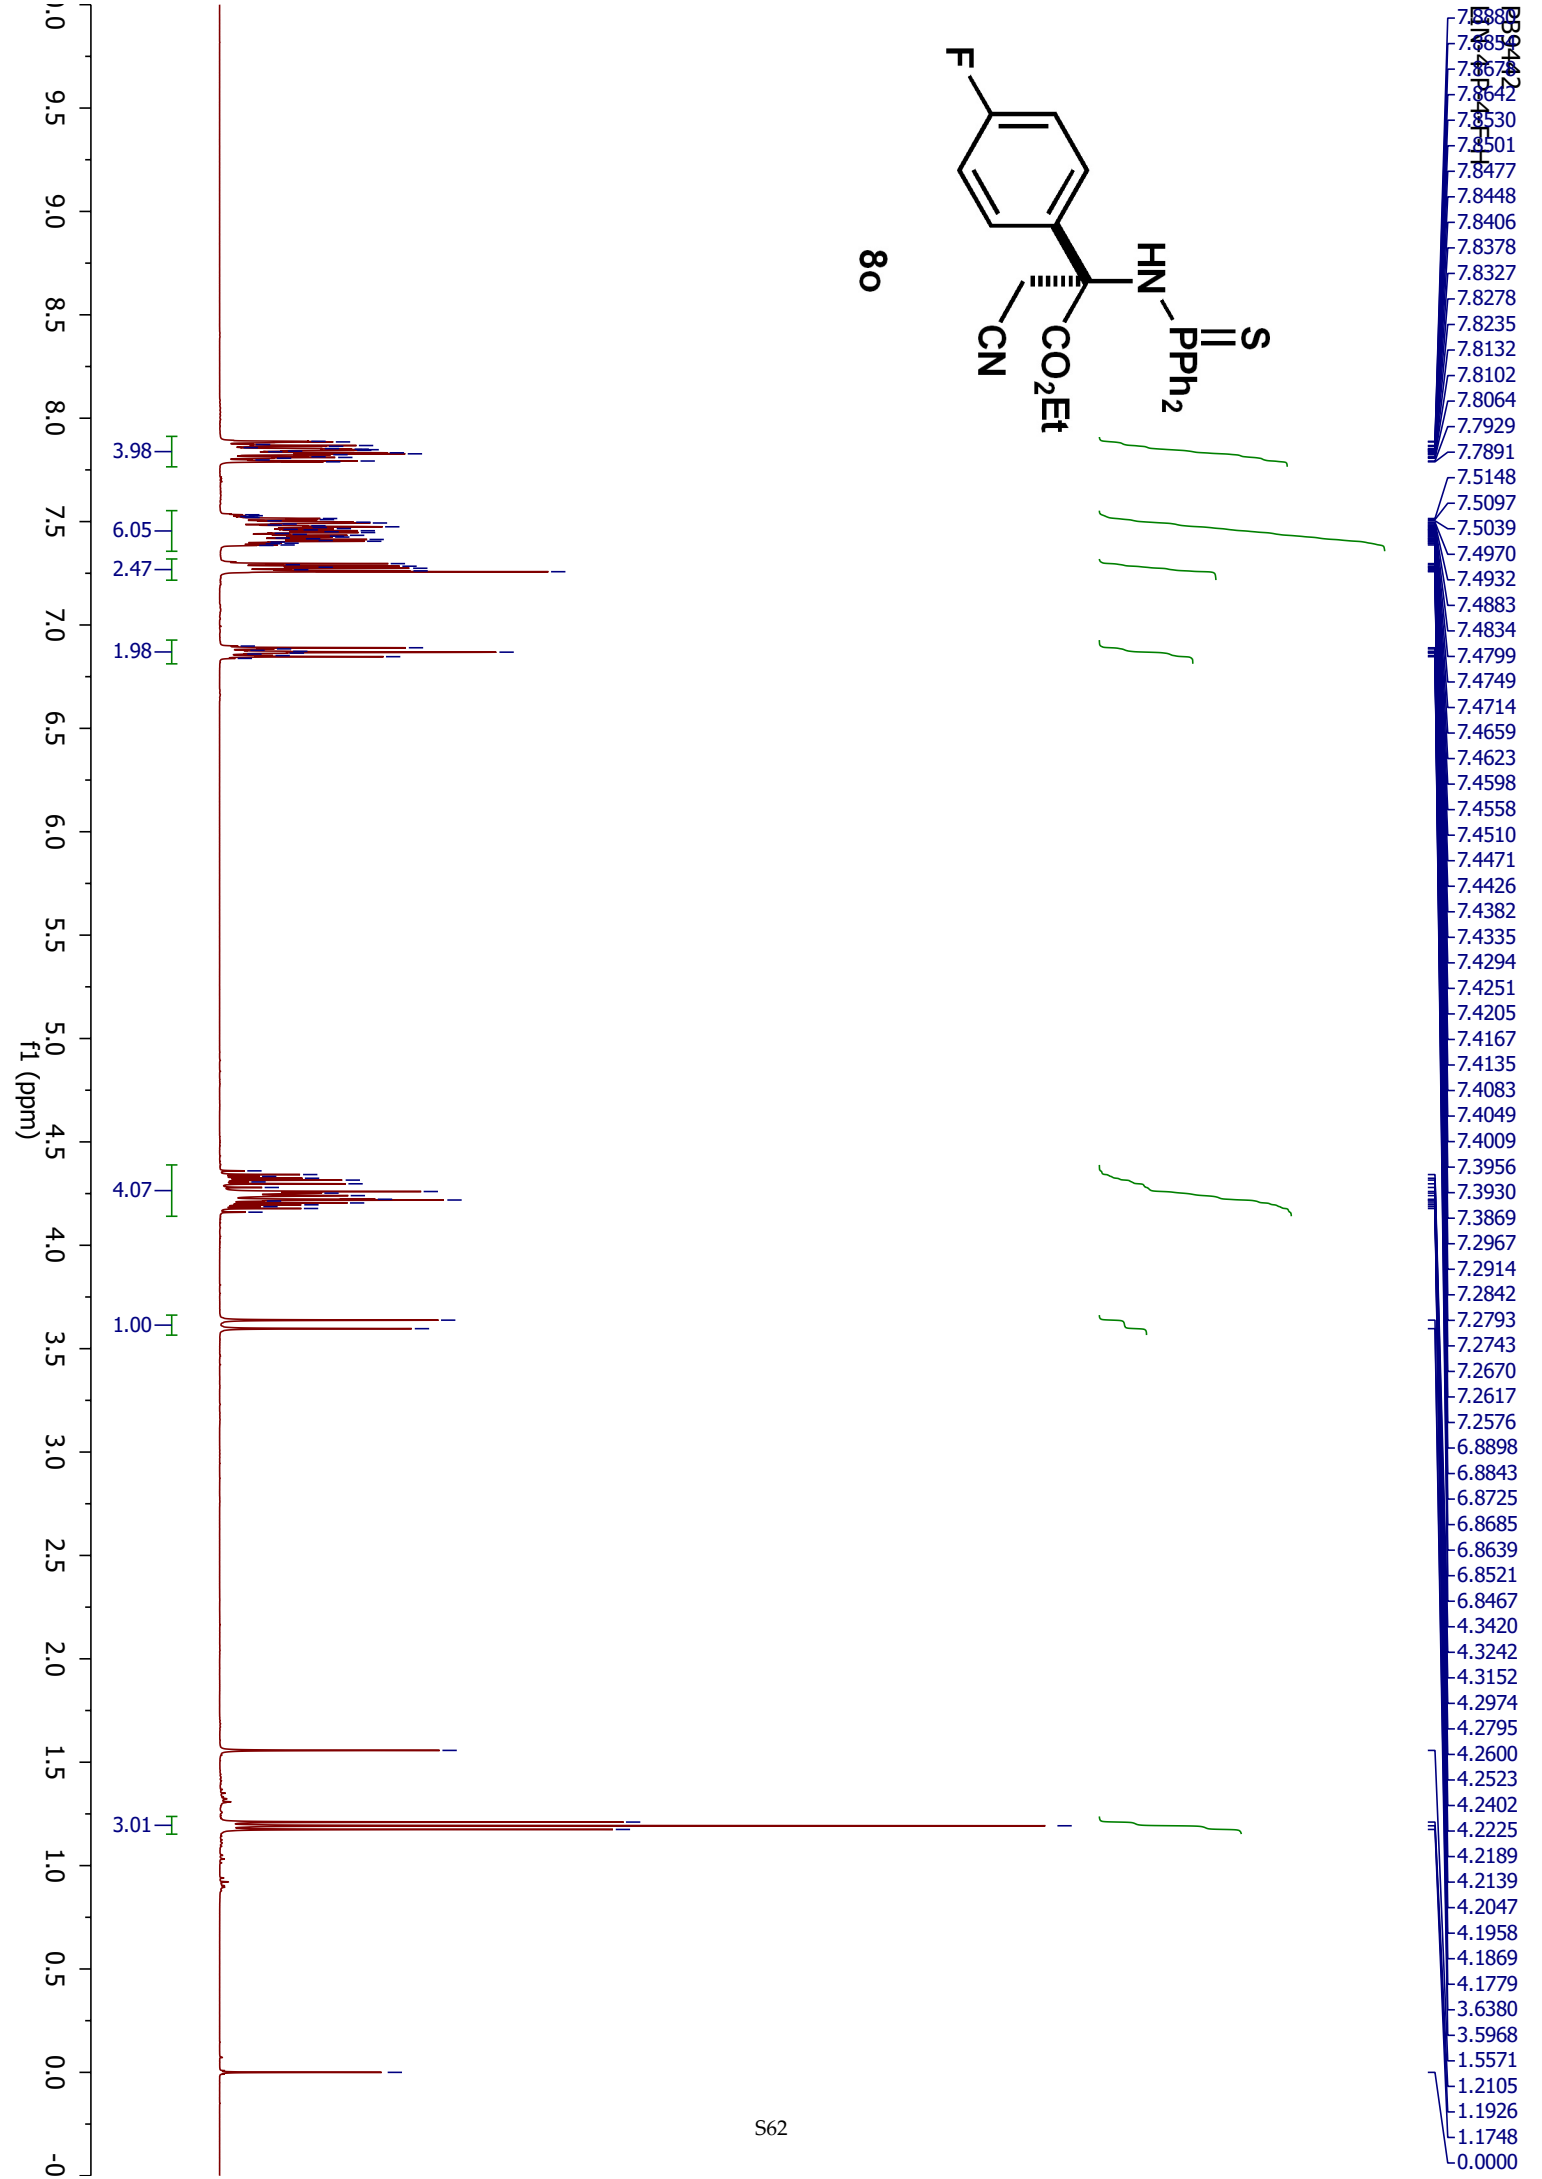

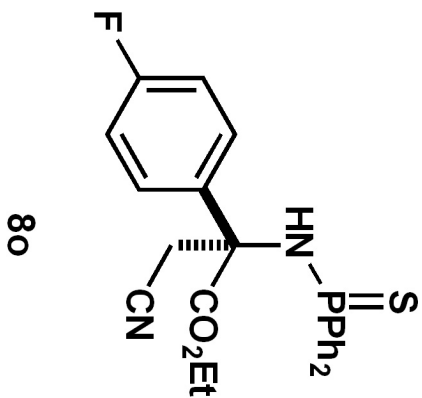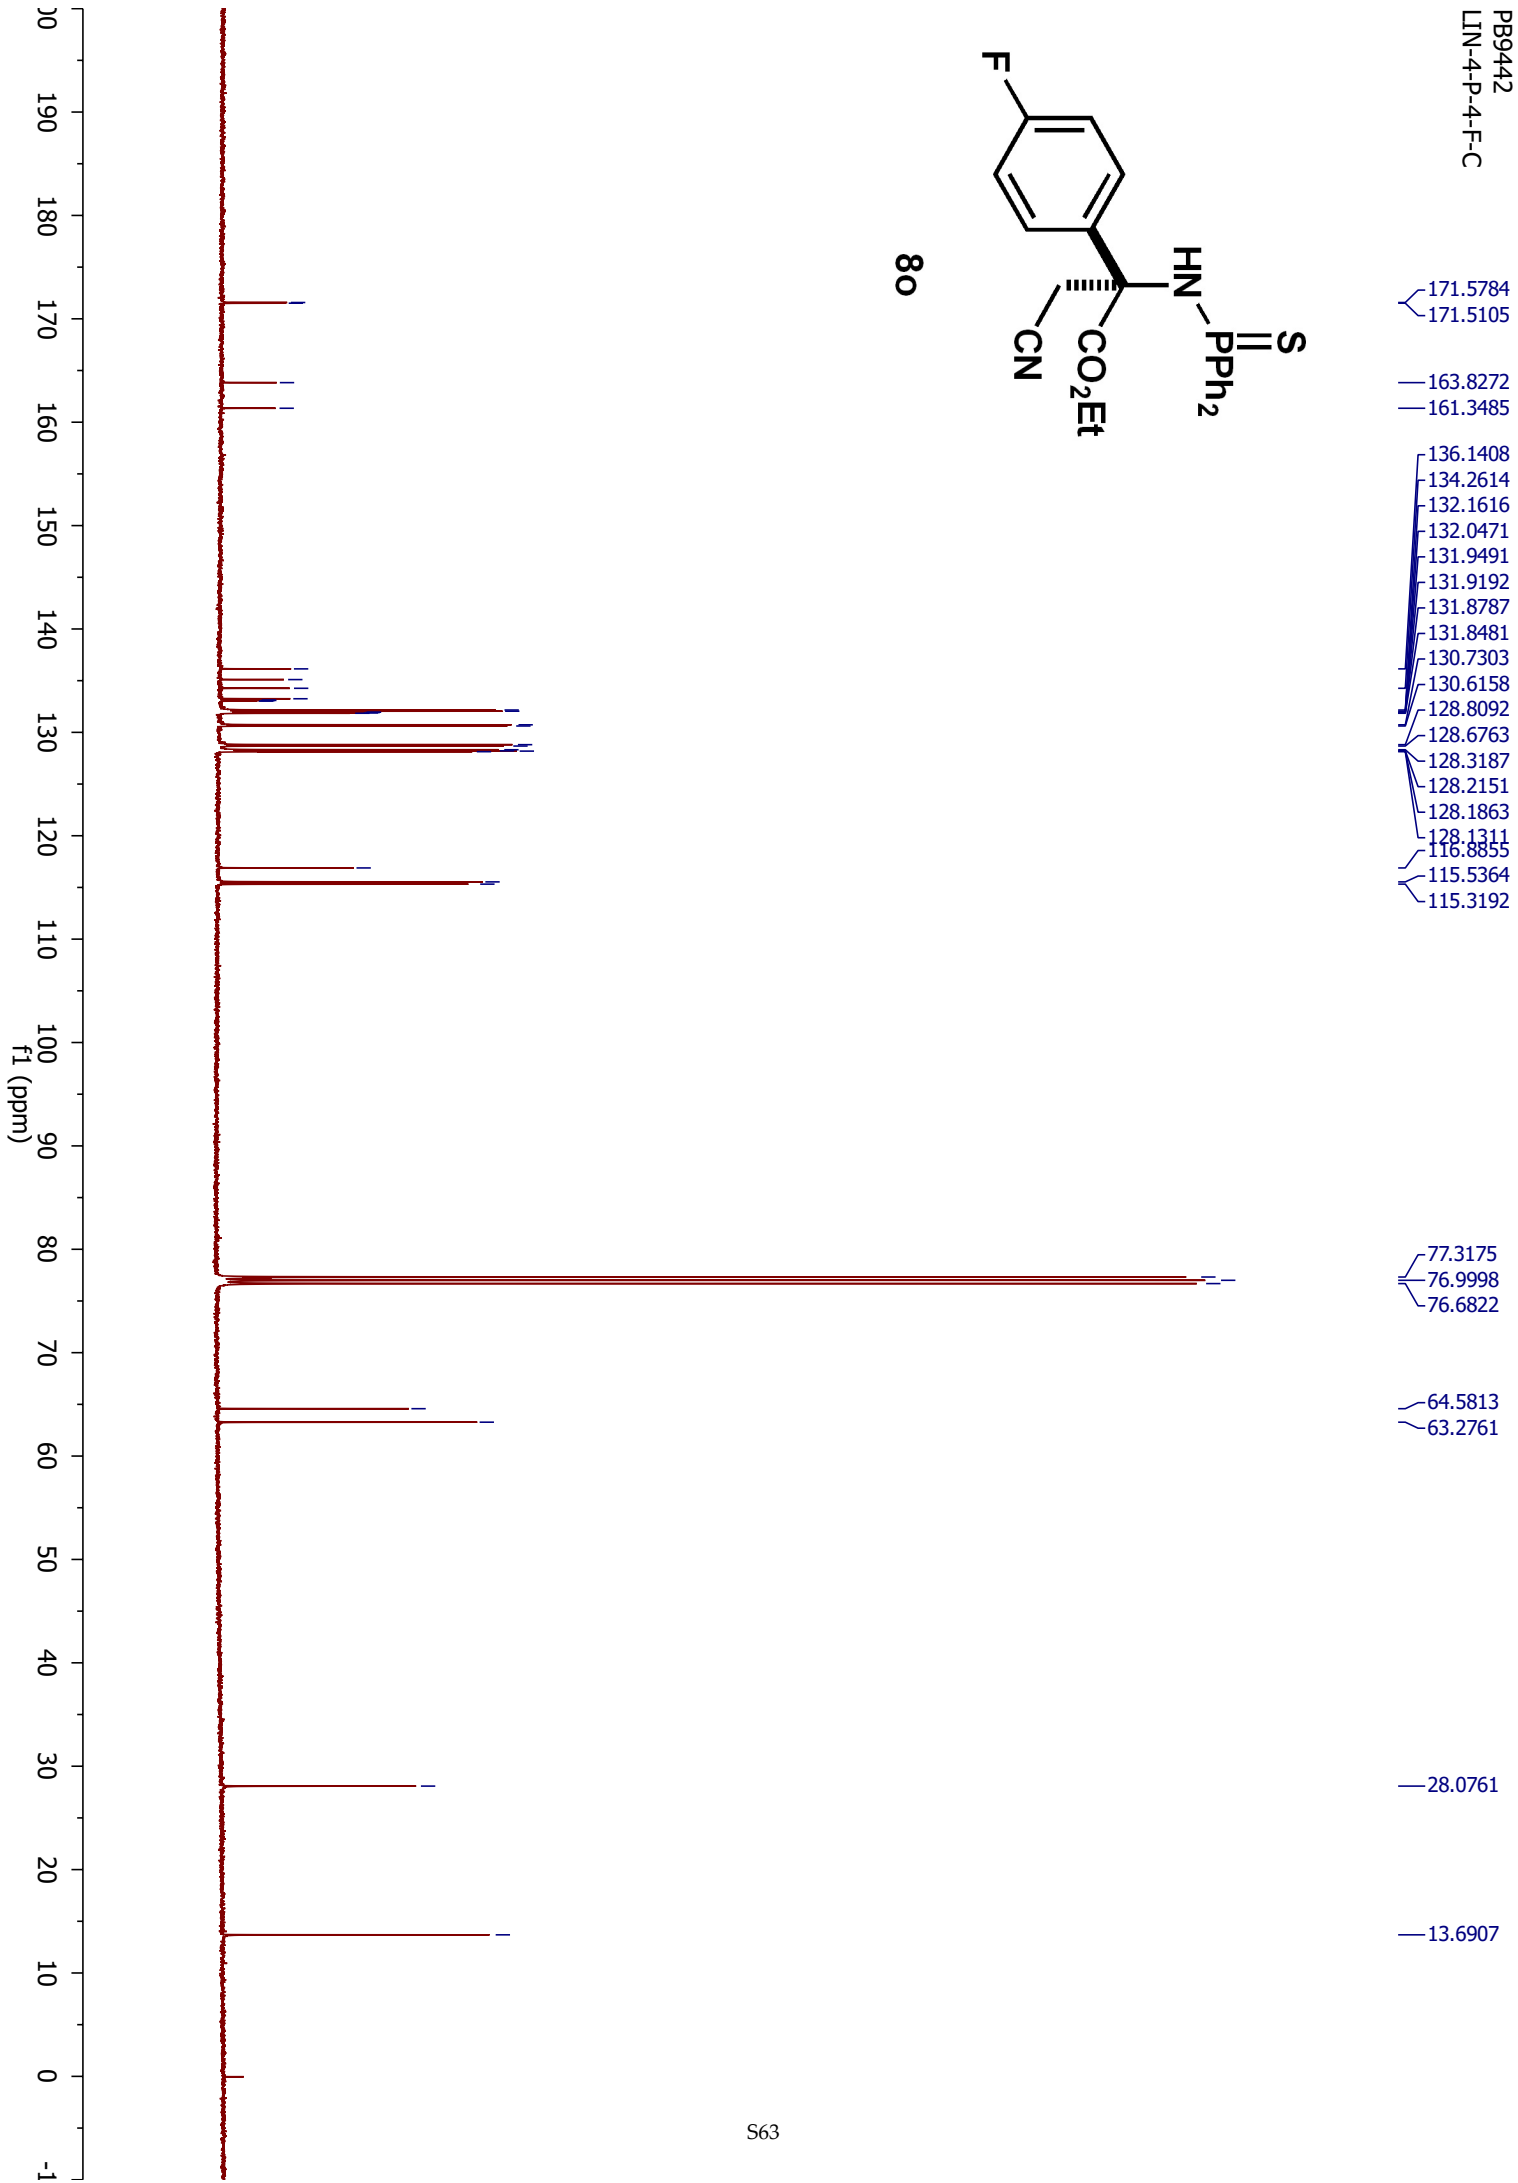

7.8222  
 7.8199  
 7.8185  
 7.8118  
 7.8081  
 7.8061  
 7.8027  
 7.8013  
 7.8073  
 7.8041  
 7.8307  
 7.8256  
 7.8217  
 7.8167  
 7.8128  
 7.8119  
 7.8084  
 7.8045  
 7.7911  
 7.7873  
 7.5124  
 7.5074  
 7.5001  
 7.4980  
 7.4944  
 7.4893  
 7.4856  
 7.4820  
 7.4765  
 7.4743  
 7.4722  
 7.4689  
 7.4655  
 7.4635  
 7.4601  
 7.4581  
 7.4540  
 7.4490  
 7.4451  
 7.4405  
 7.4363  
 7.4321  
 7.4276  
 7.4239  
 7.4197  
 7.4161  
 7.4111  
 7.4075  
 7.4040  
 7.4006  
 7.3954  
 7.3920  
 7.3875  
 7.3828  
 7.3741  
 7.2567  
 7.2061  
 7.2009  
 7.1274  
 7.1222  
 7.1073  
 7.1021  
 7.0599  
 7.0396  
 4.3479  
 4.3300  
 4.3210  
 4.3032  
 4.2941  
 4.2854  
 4.2614  
 4.2530  
 4.2486  
 4.2371  
 4.2192  
 4.2013  
 4.1924  
 4.1745  
 3.6197  
 3.5785  
 2.2610  
 1.5580  
 1.2142  
 1.1964  
 1.1785  
 -0.0000

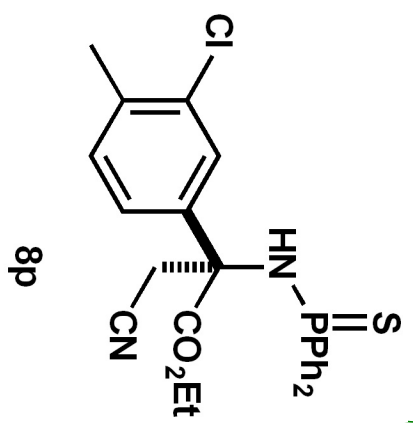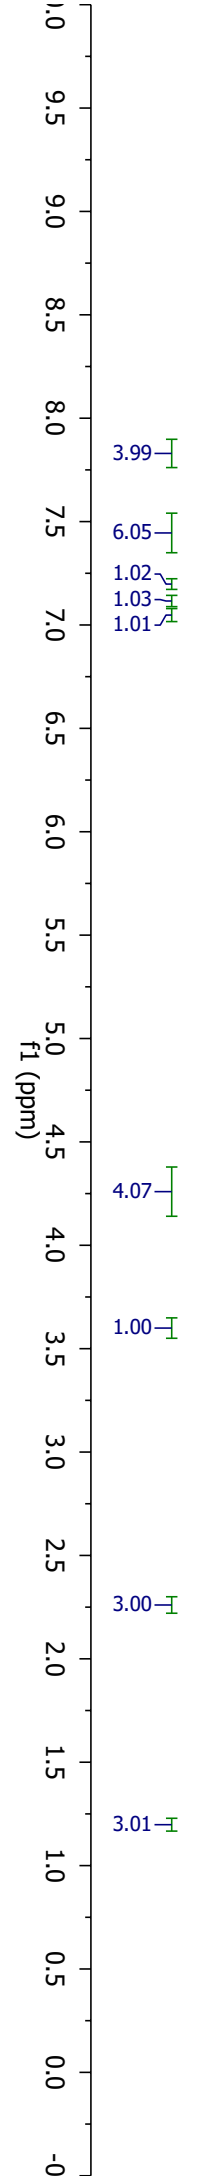



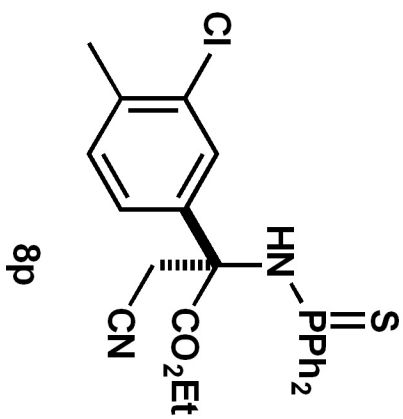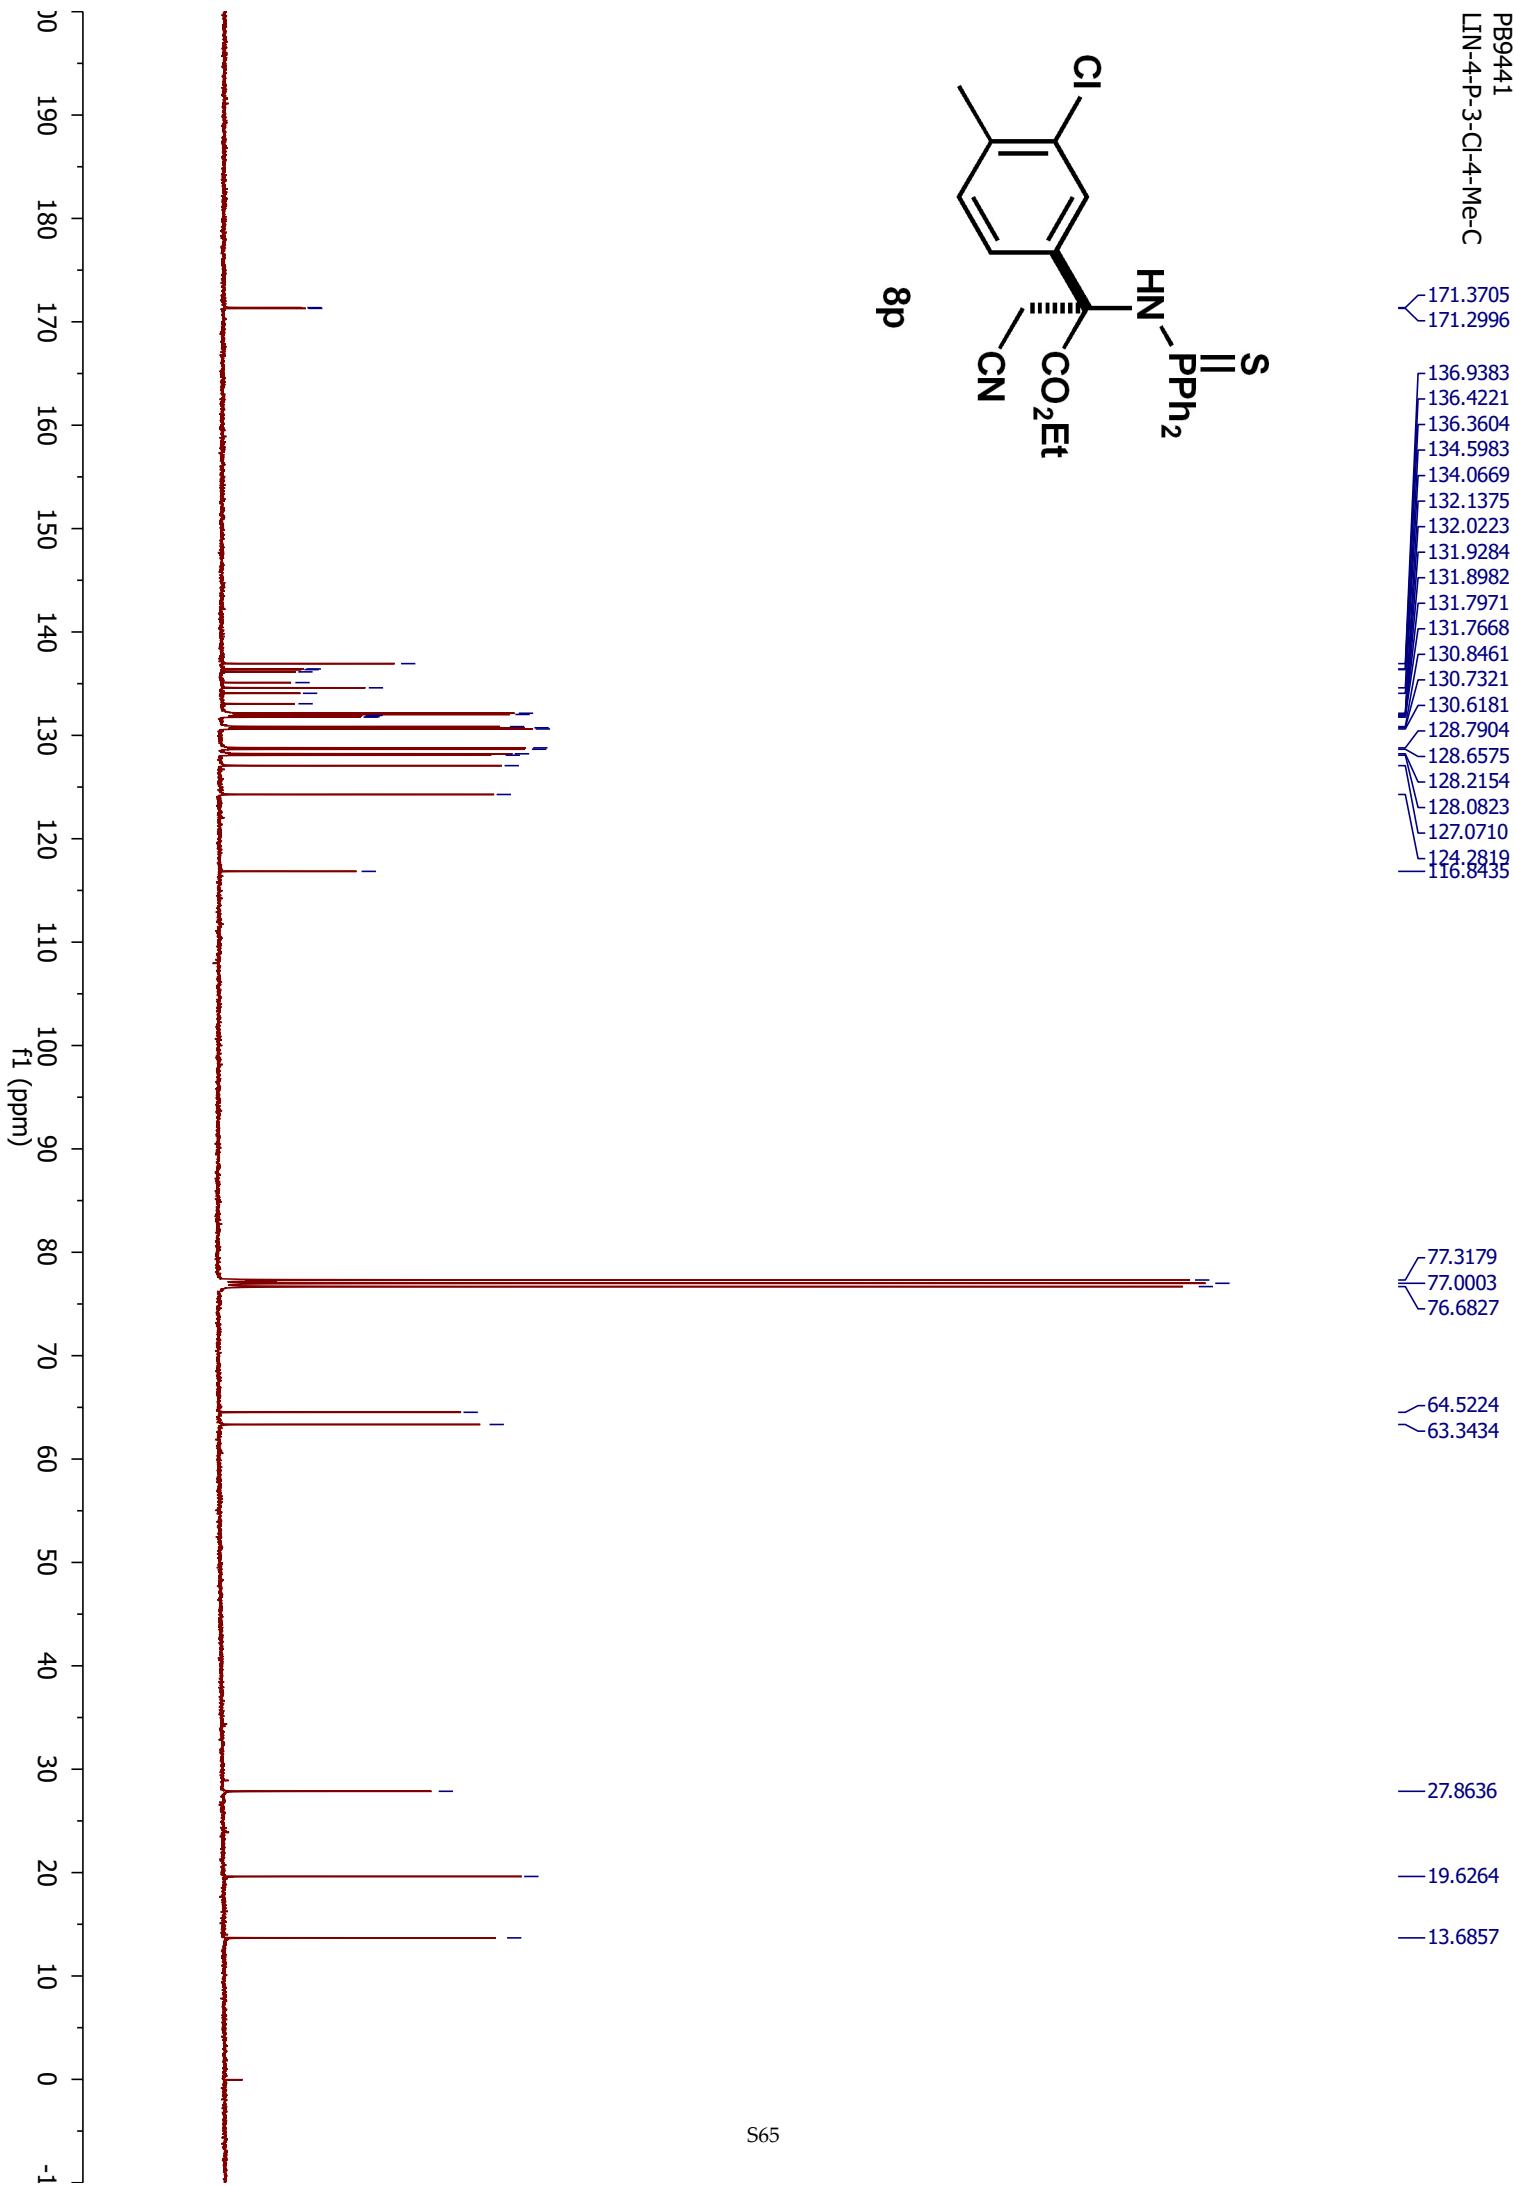

7.9555  
 7.9330  
 7.9203  
 7.8819  
 7.8819  
 7.8805  
 7.8800  
 7.8502  
 7.8469  
 7.8375  
 7.8323  
 7.8284  
 7.8181  
 7.8152  
 7.8114  
 7.8030  
 7.7979  
 7.7941  
 7.5197  
 7.5151  
 7.5015  
 7.4965  
 7.4903  
 7.4869  
 7.4833  
 7.4786  
 7.4749  
 7.4706  
 7.4641  
 7.4622  
 7.4596  
 7.4540  
 7.4499  
 7.4464  
 7.4437  
 7.4391  
 7.4353  
 7.4307  
 7.4264  
 7.4222  
 7.4177  
 7.4140  
 7.4039  
 7.4002  
 7.3953  
 7.3917  
 7.3880  
 7.3848  
 7.3793  
 7.3760  
 7.3731  
 7.3681  
 7.3642  
 7.3576  
 7.3522  
 7.3185  
 7.3135  
 7.3019  
 7.2976  
 7.2542  
 4.3575  
 4.3396  
 4.3307  
 4.3217  
 4.3128  
 4.3039  
 4.2949  
 4.2771  
 4.2361  
 4.2193  
 4.2093  
 4.2003  
 4.1914  
 4.1783  
 4.1737  
 4.1646  
 4.1558  
 3.6674  
 3.6260  
 1.5564  
 1.2103  
 1.1924  
 1.1745  
 0.2232  
 -0.0002

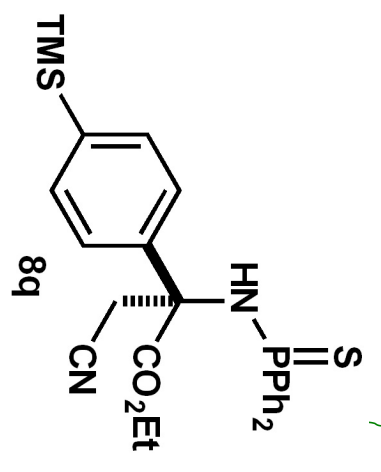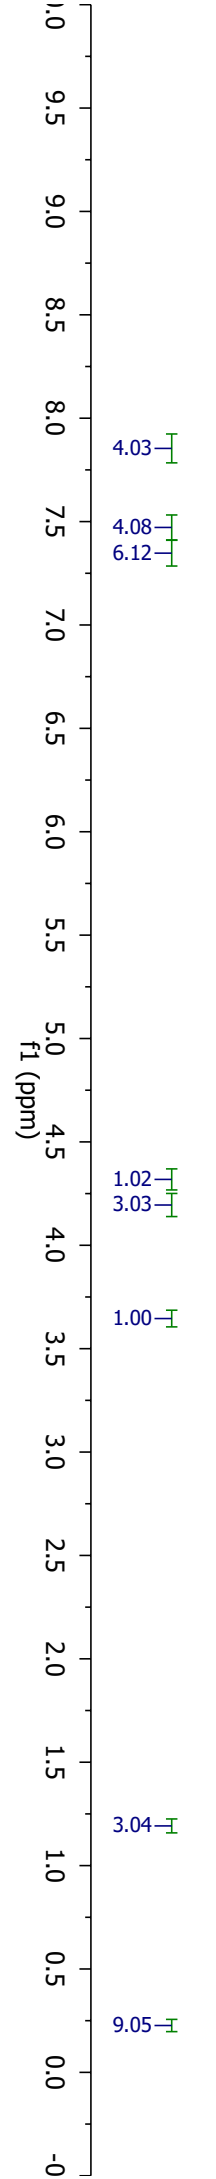

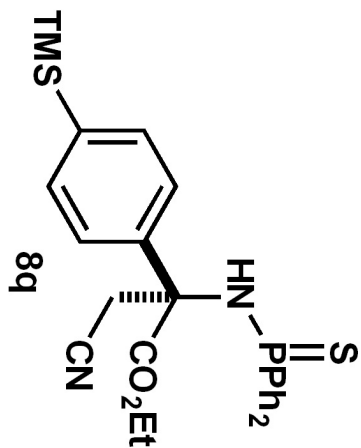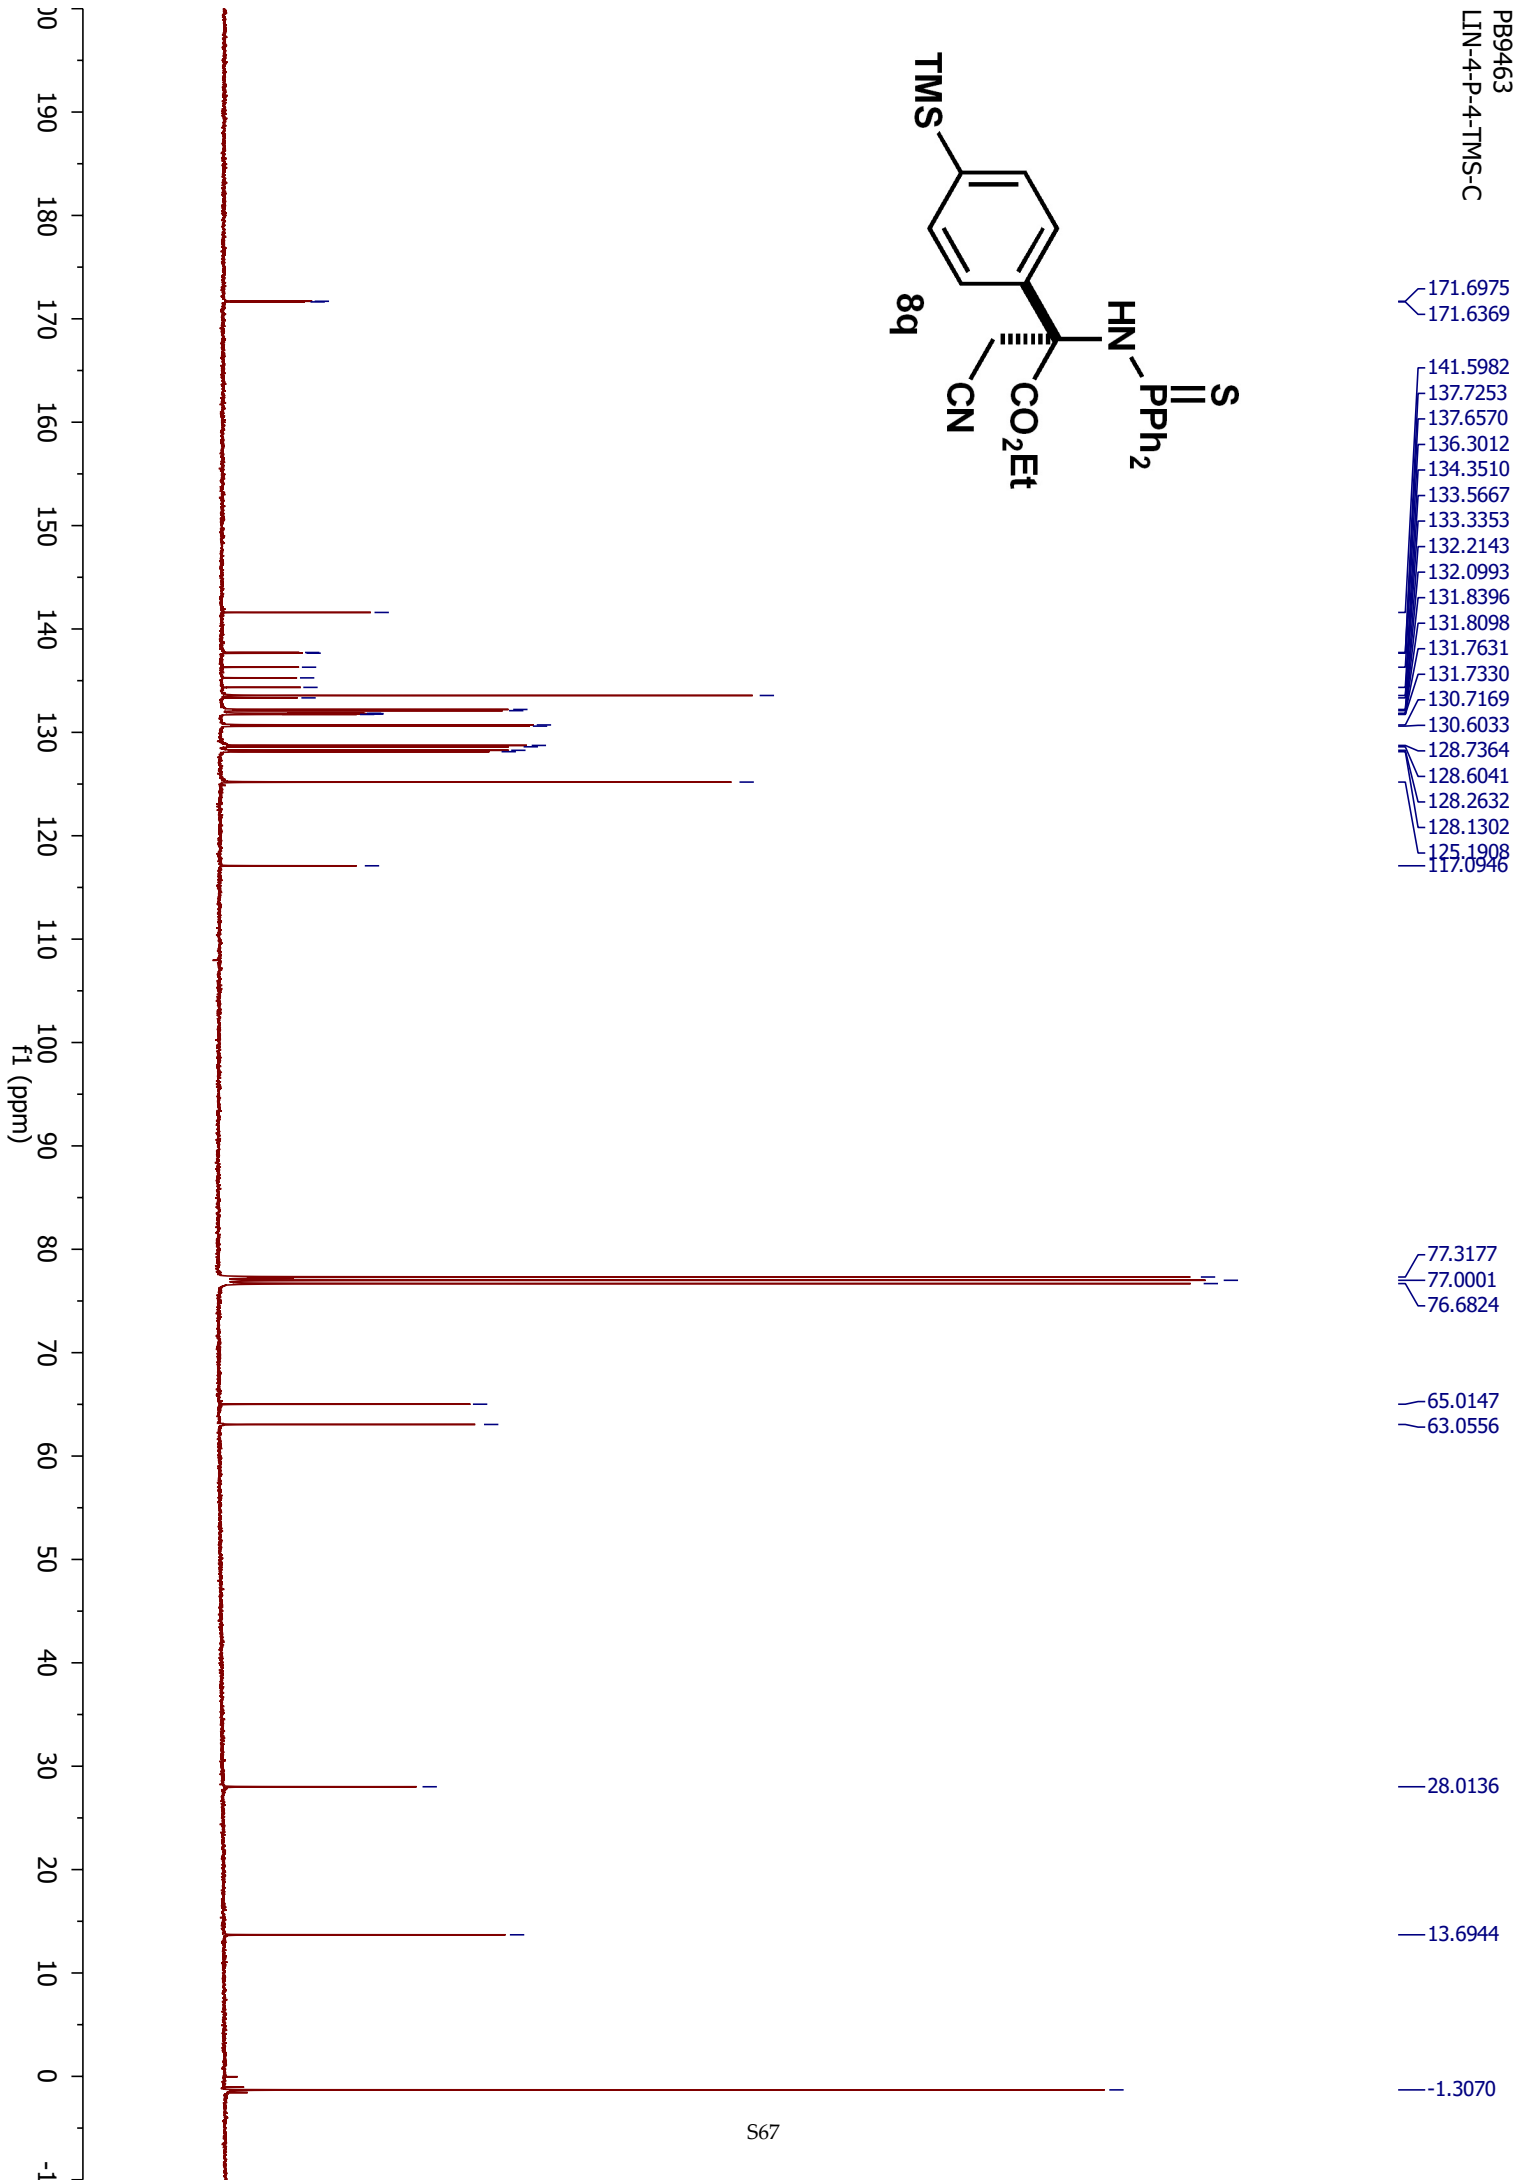

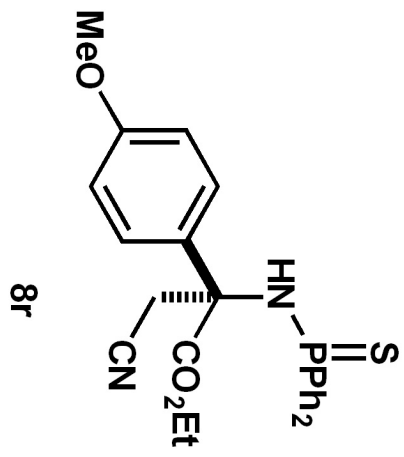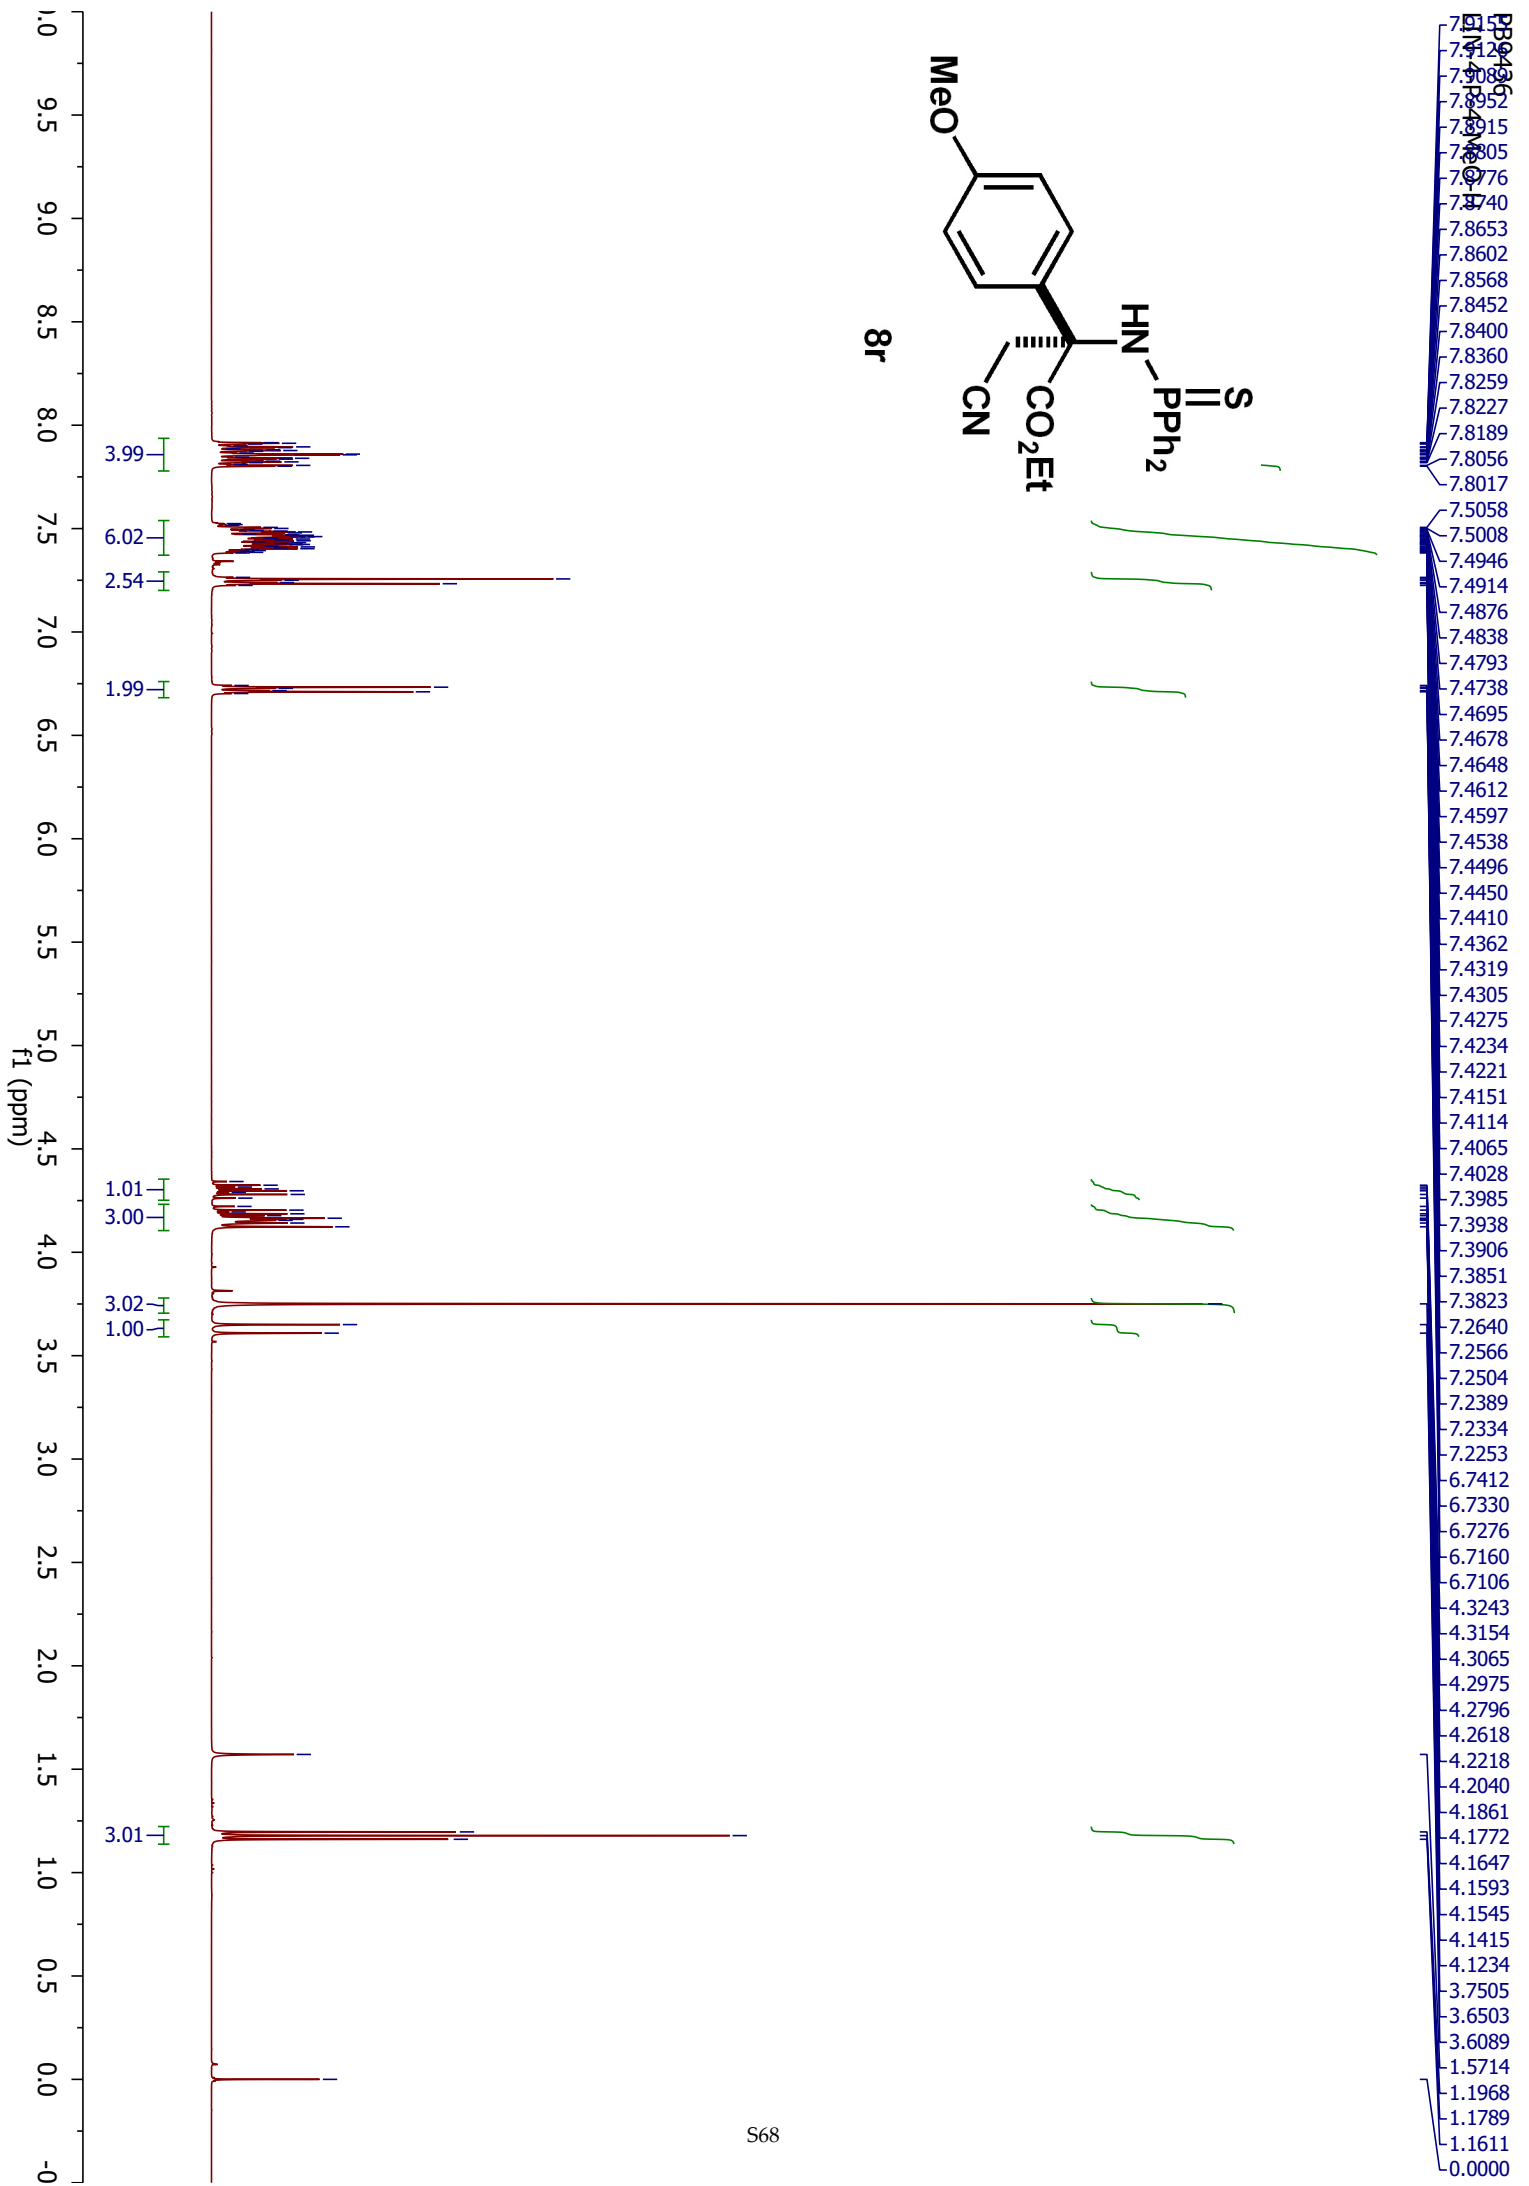

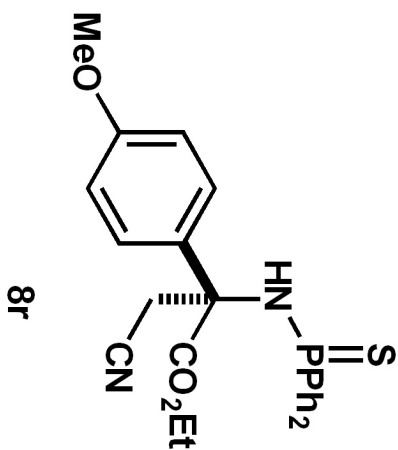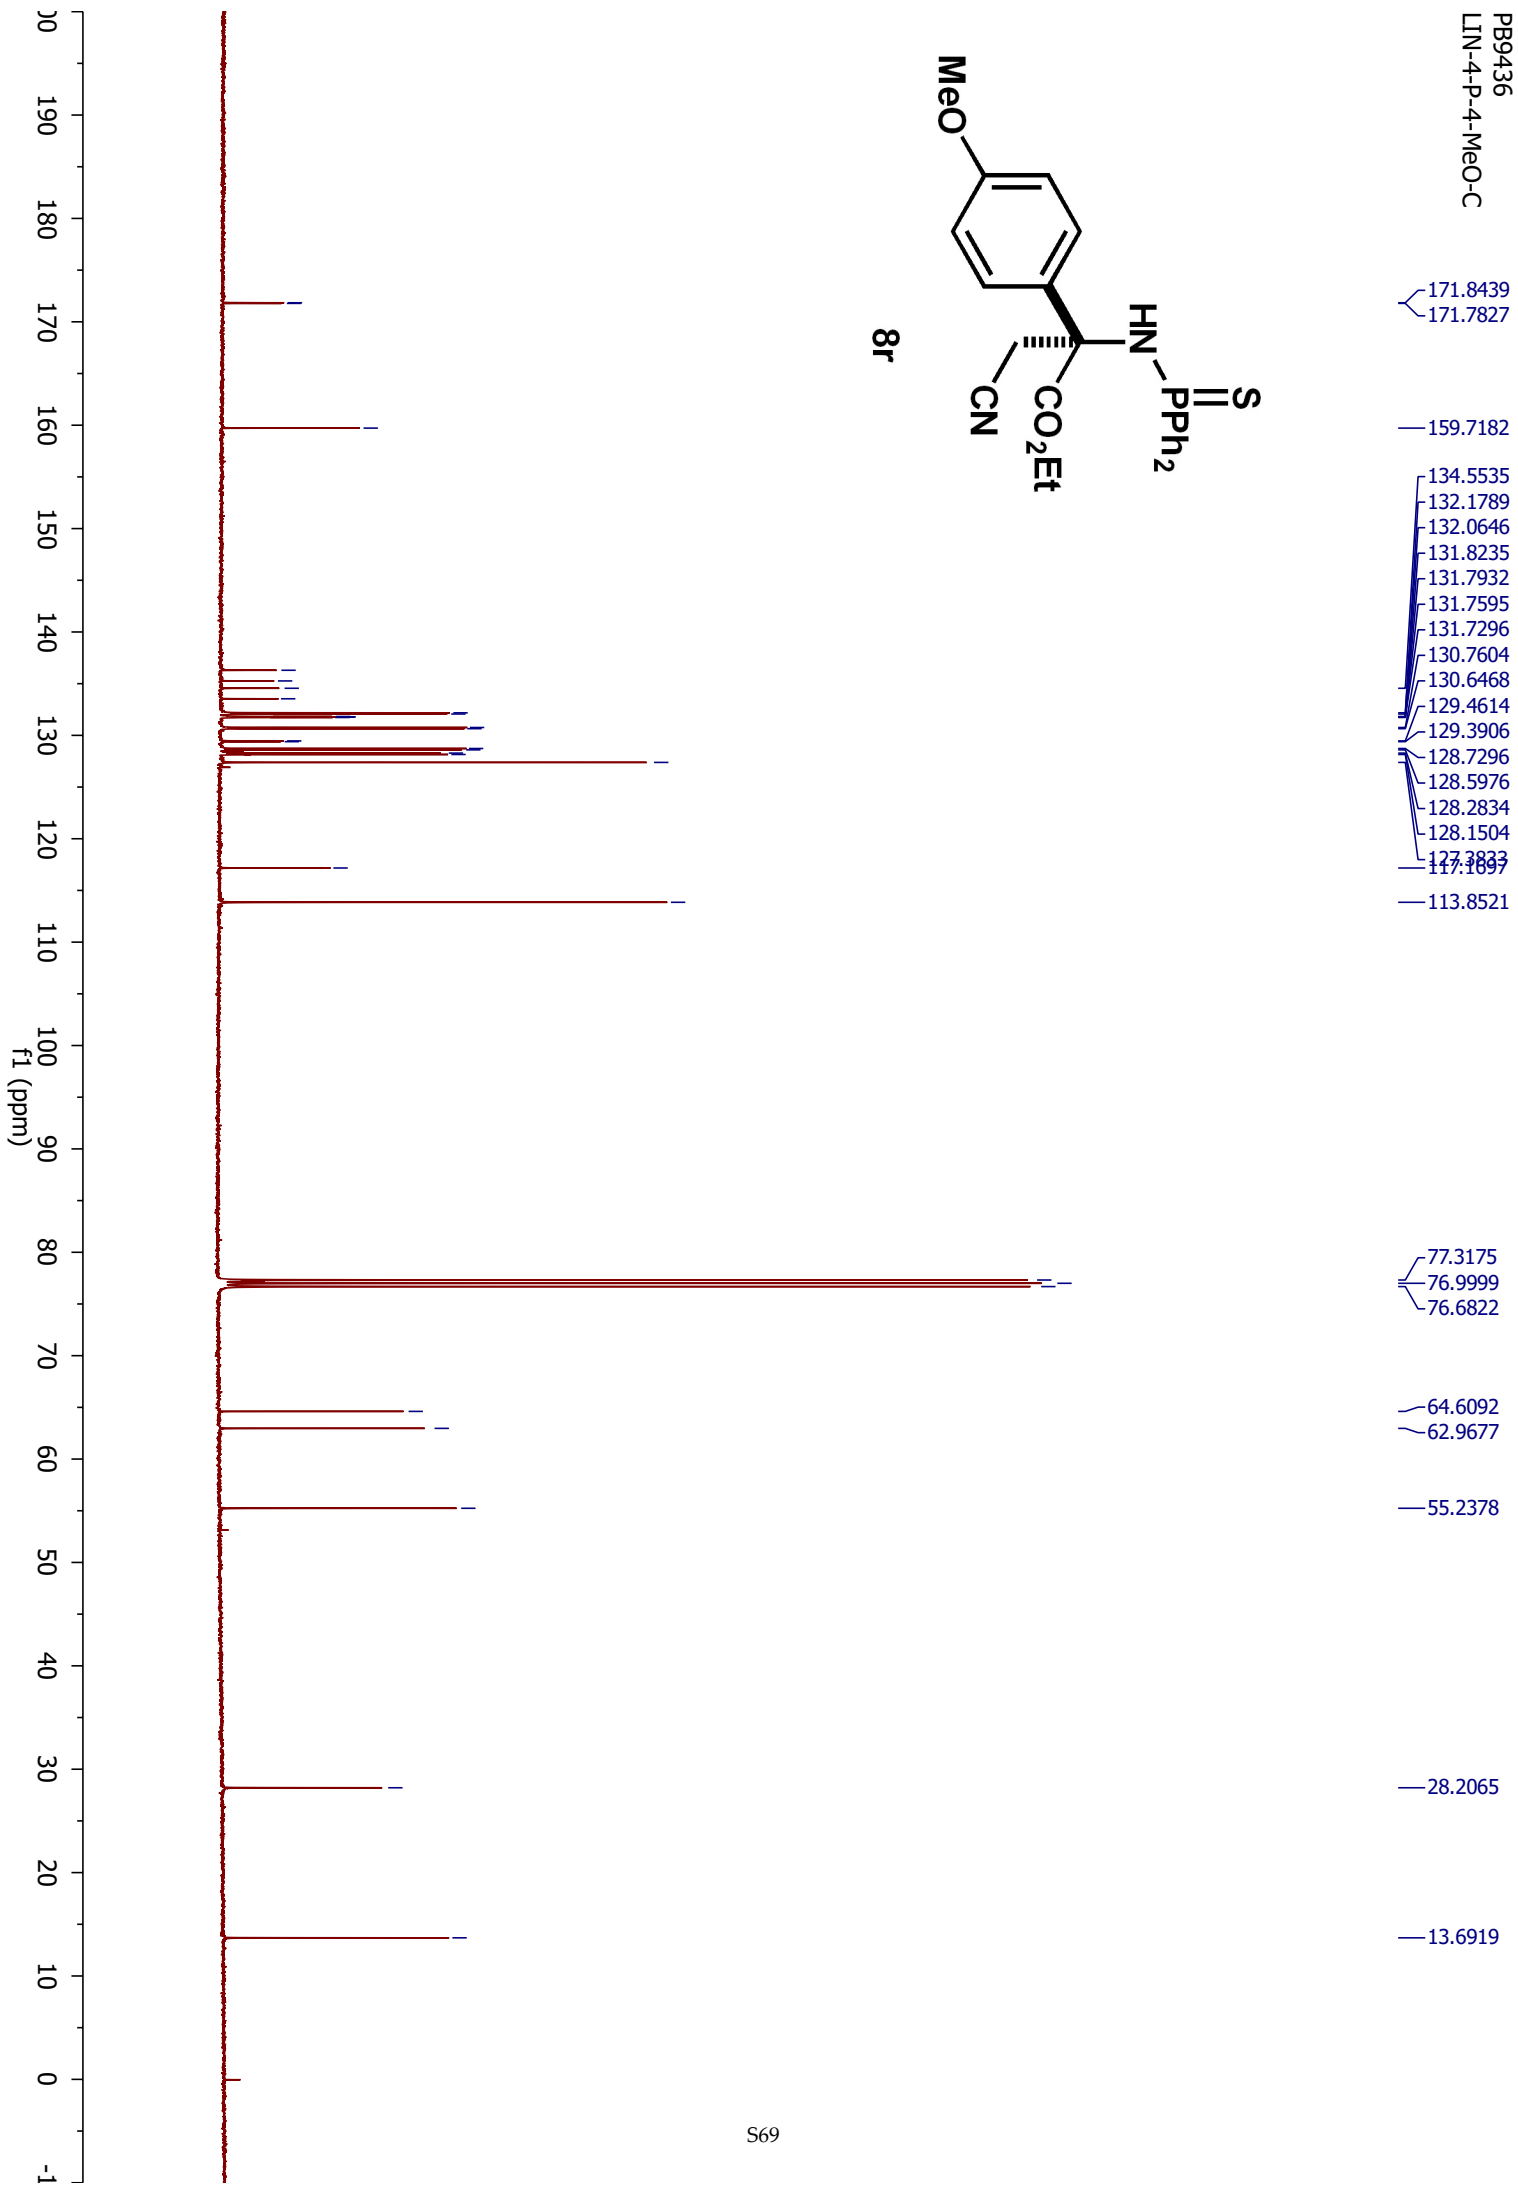

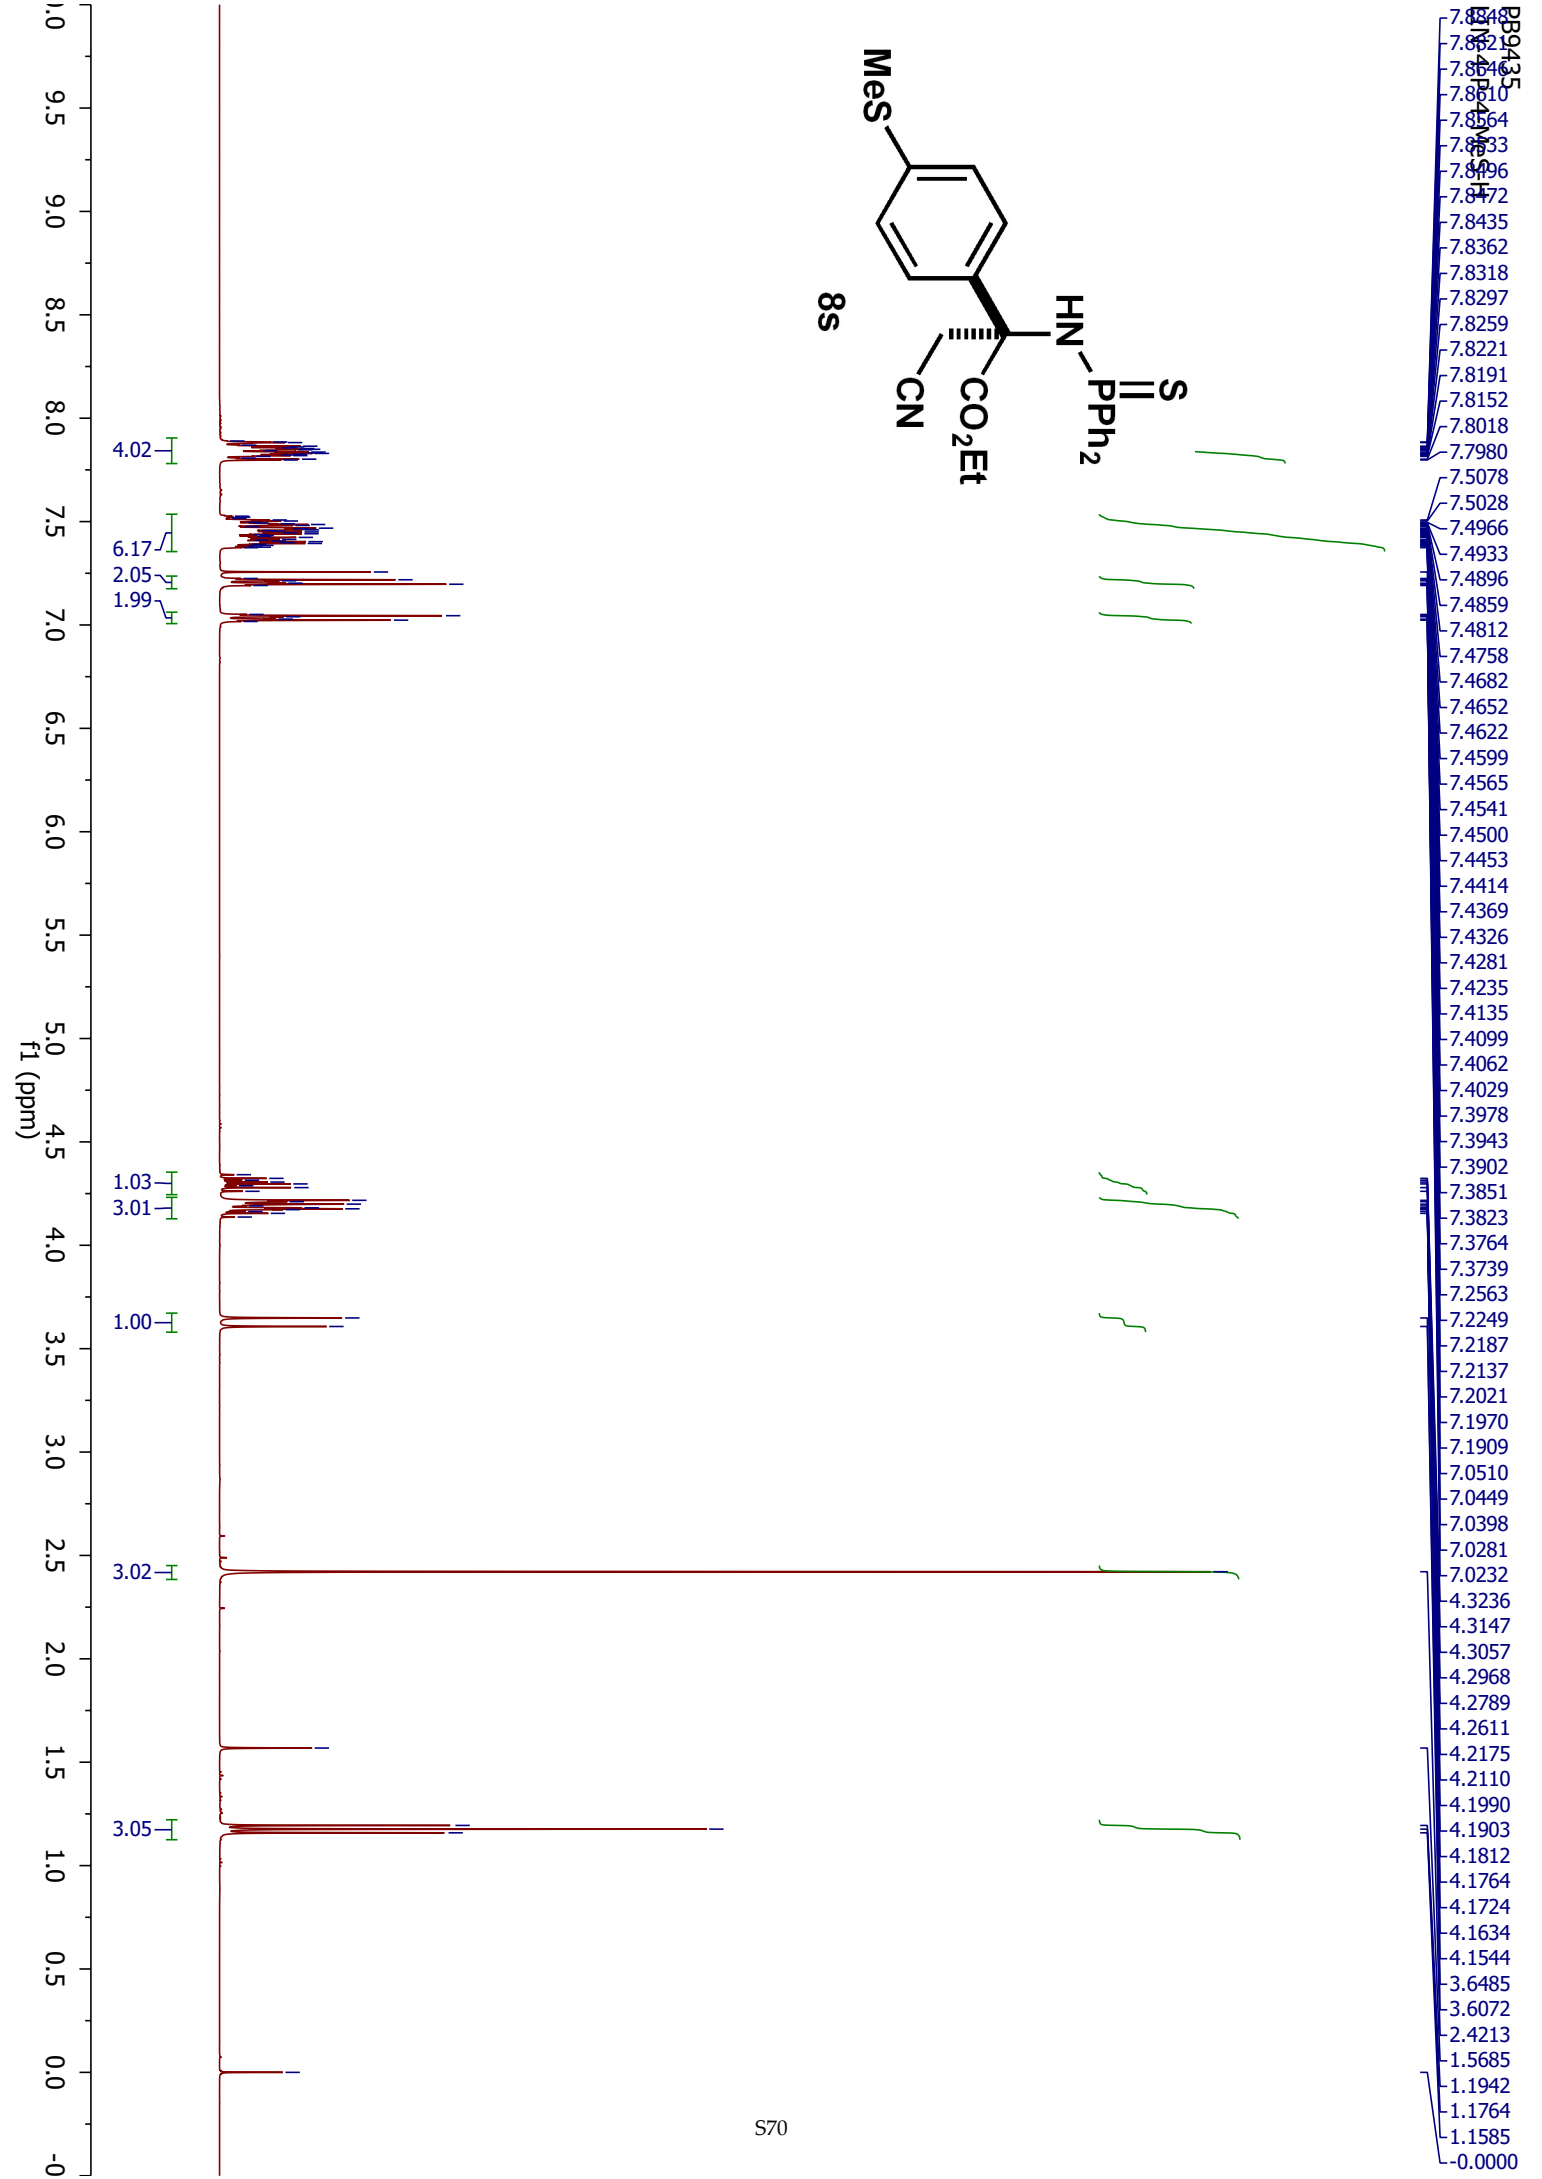

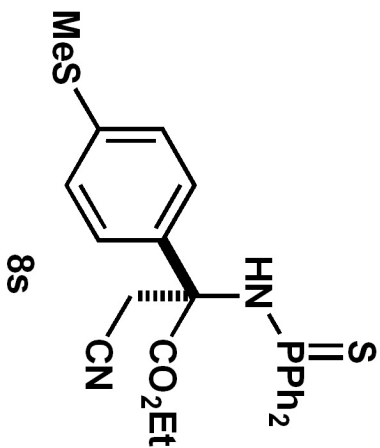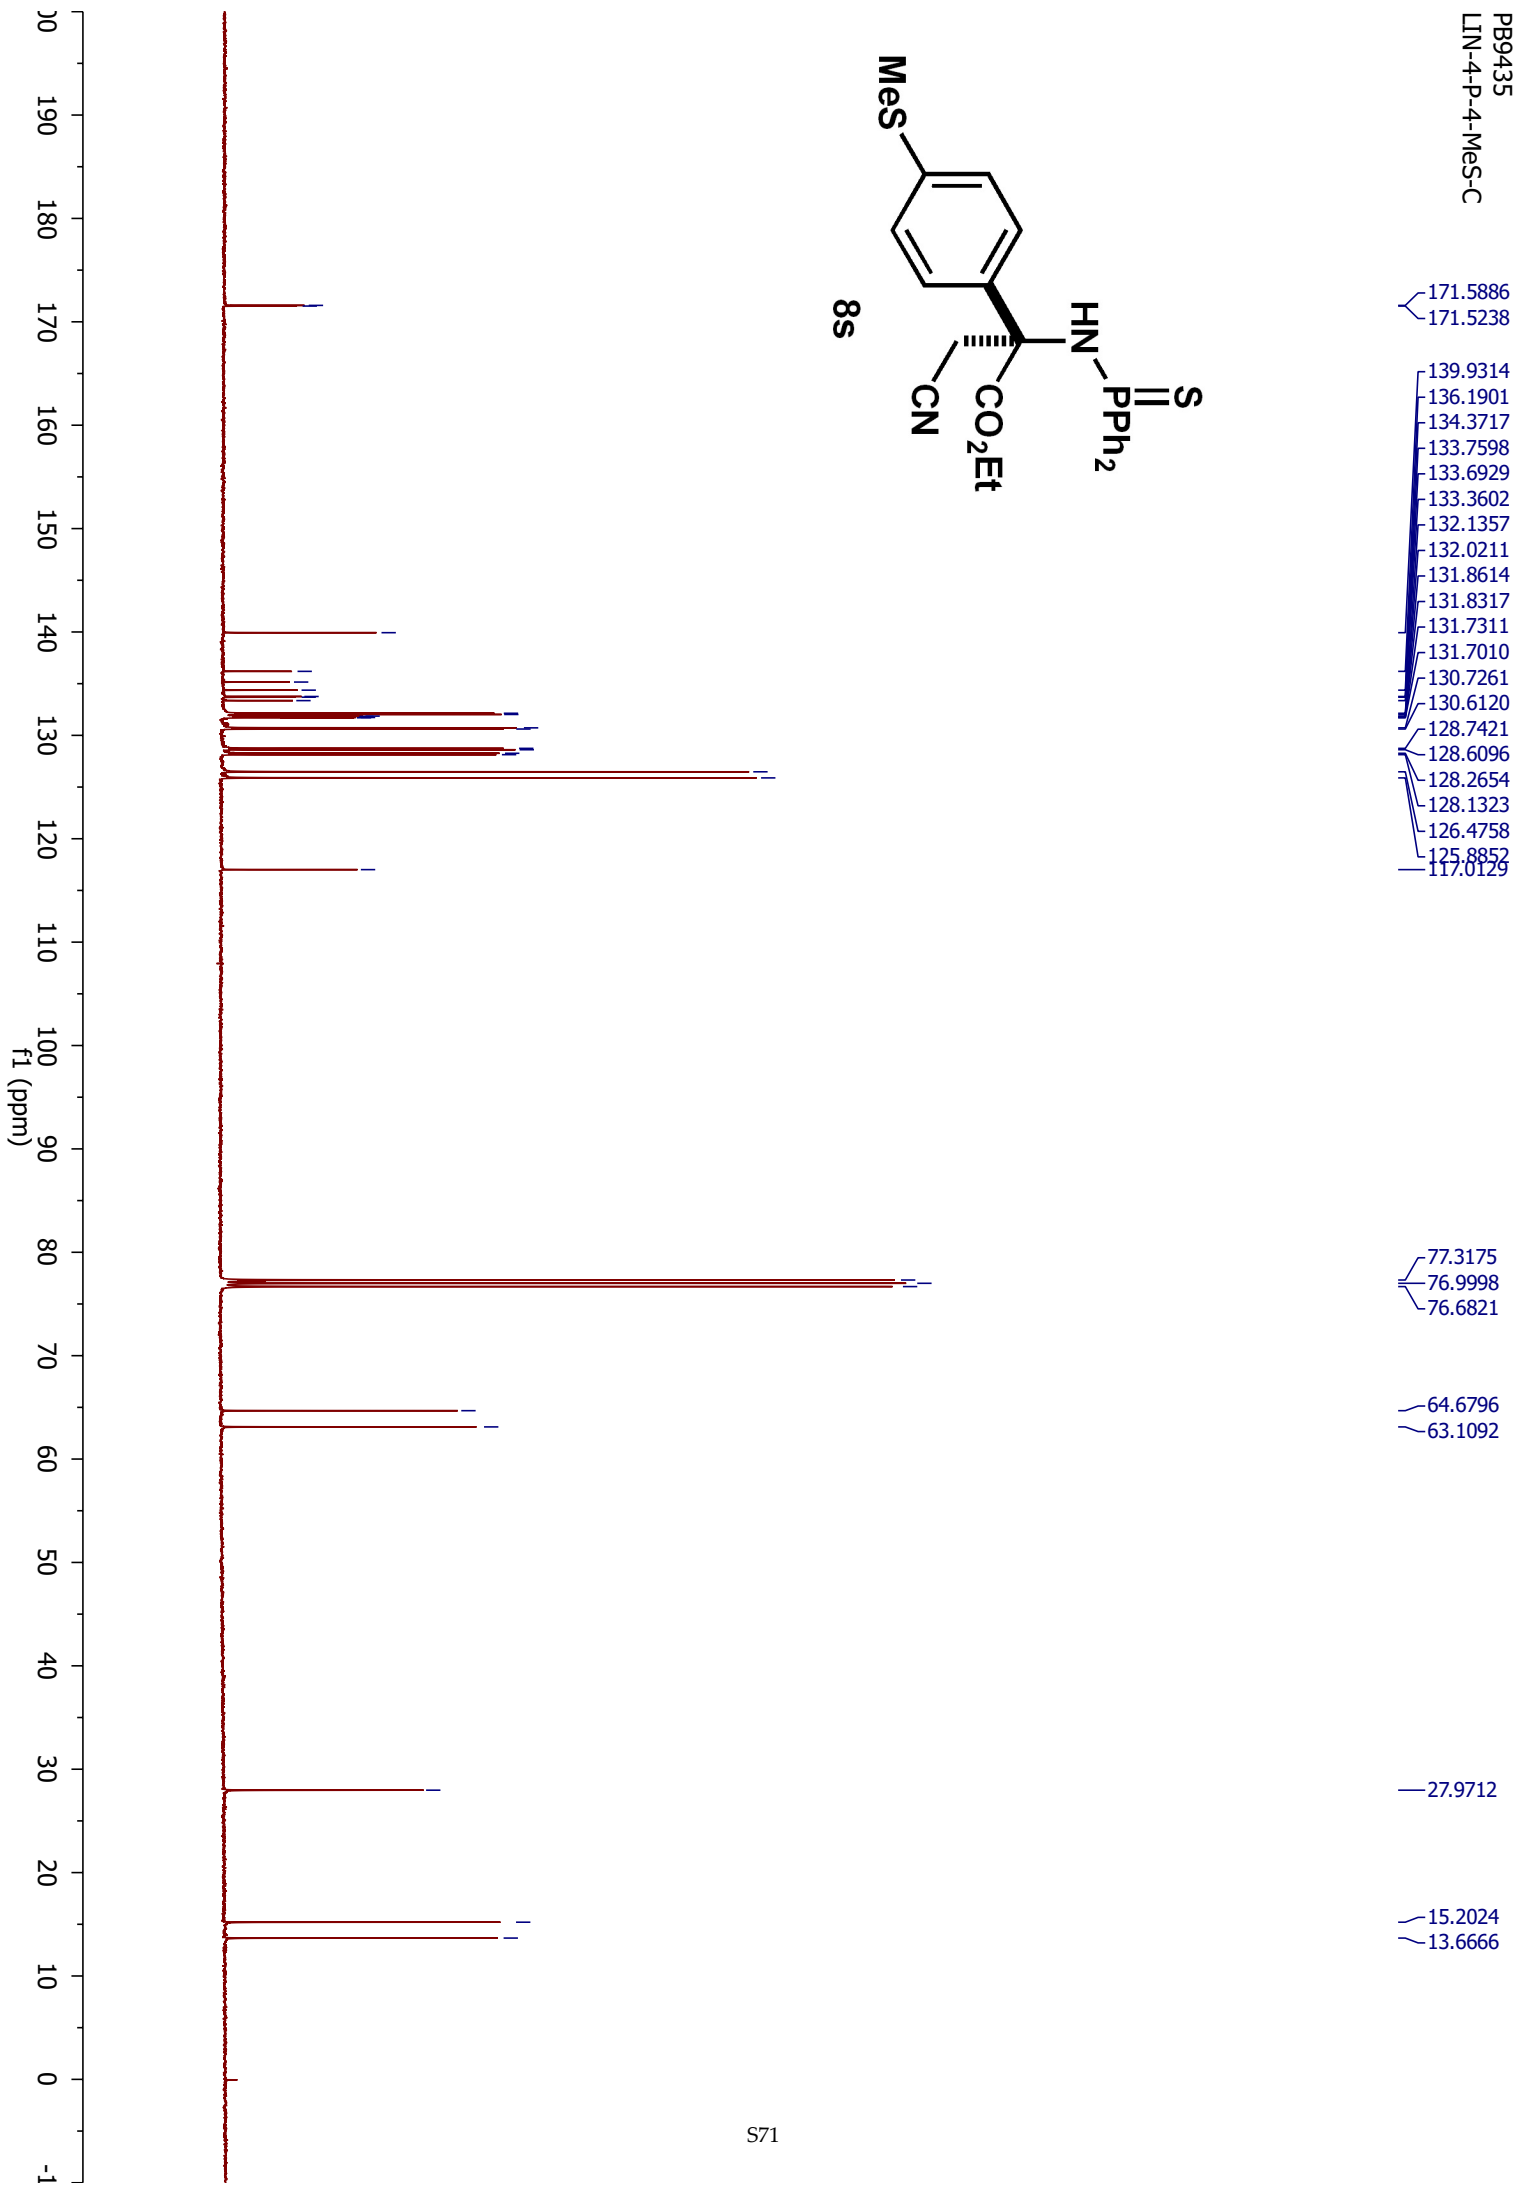

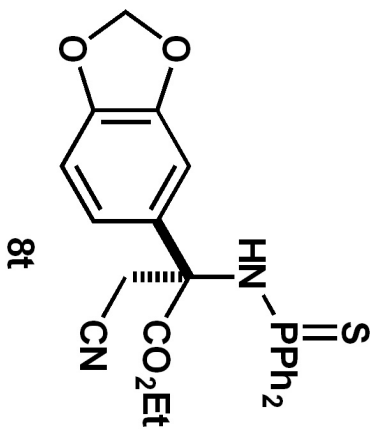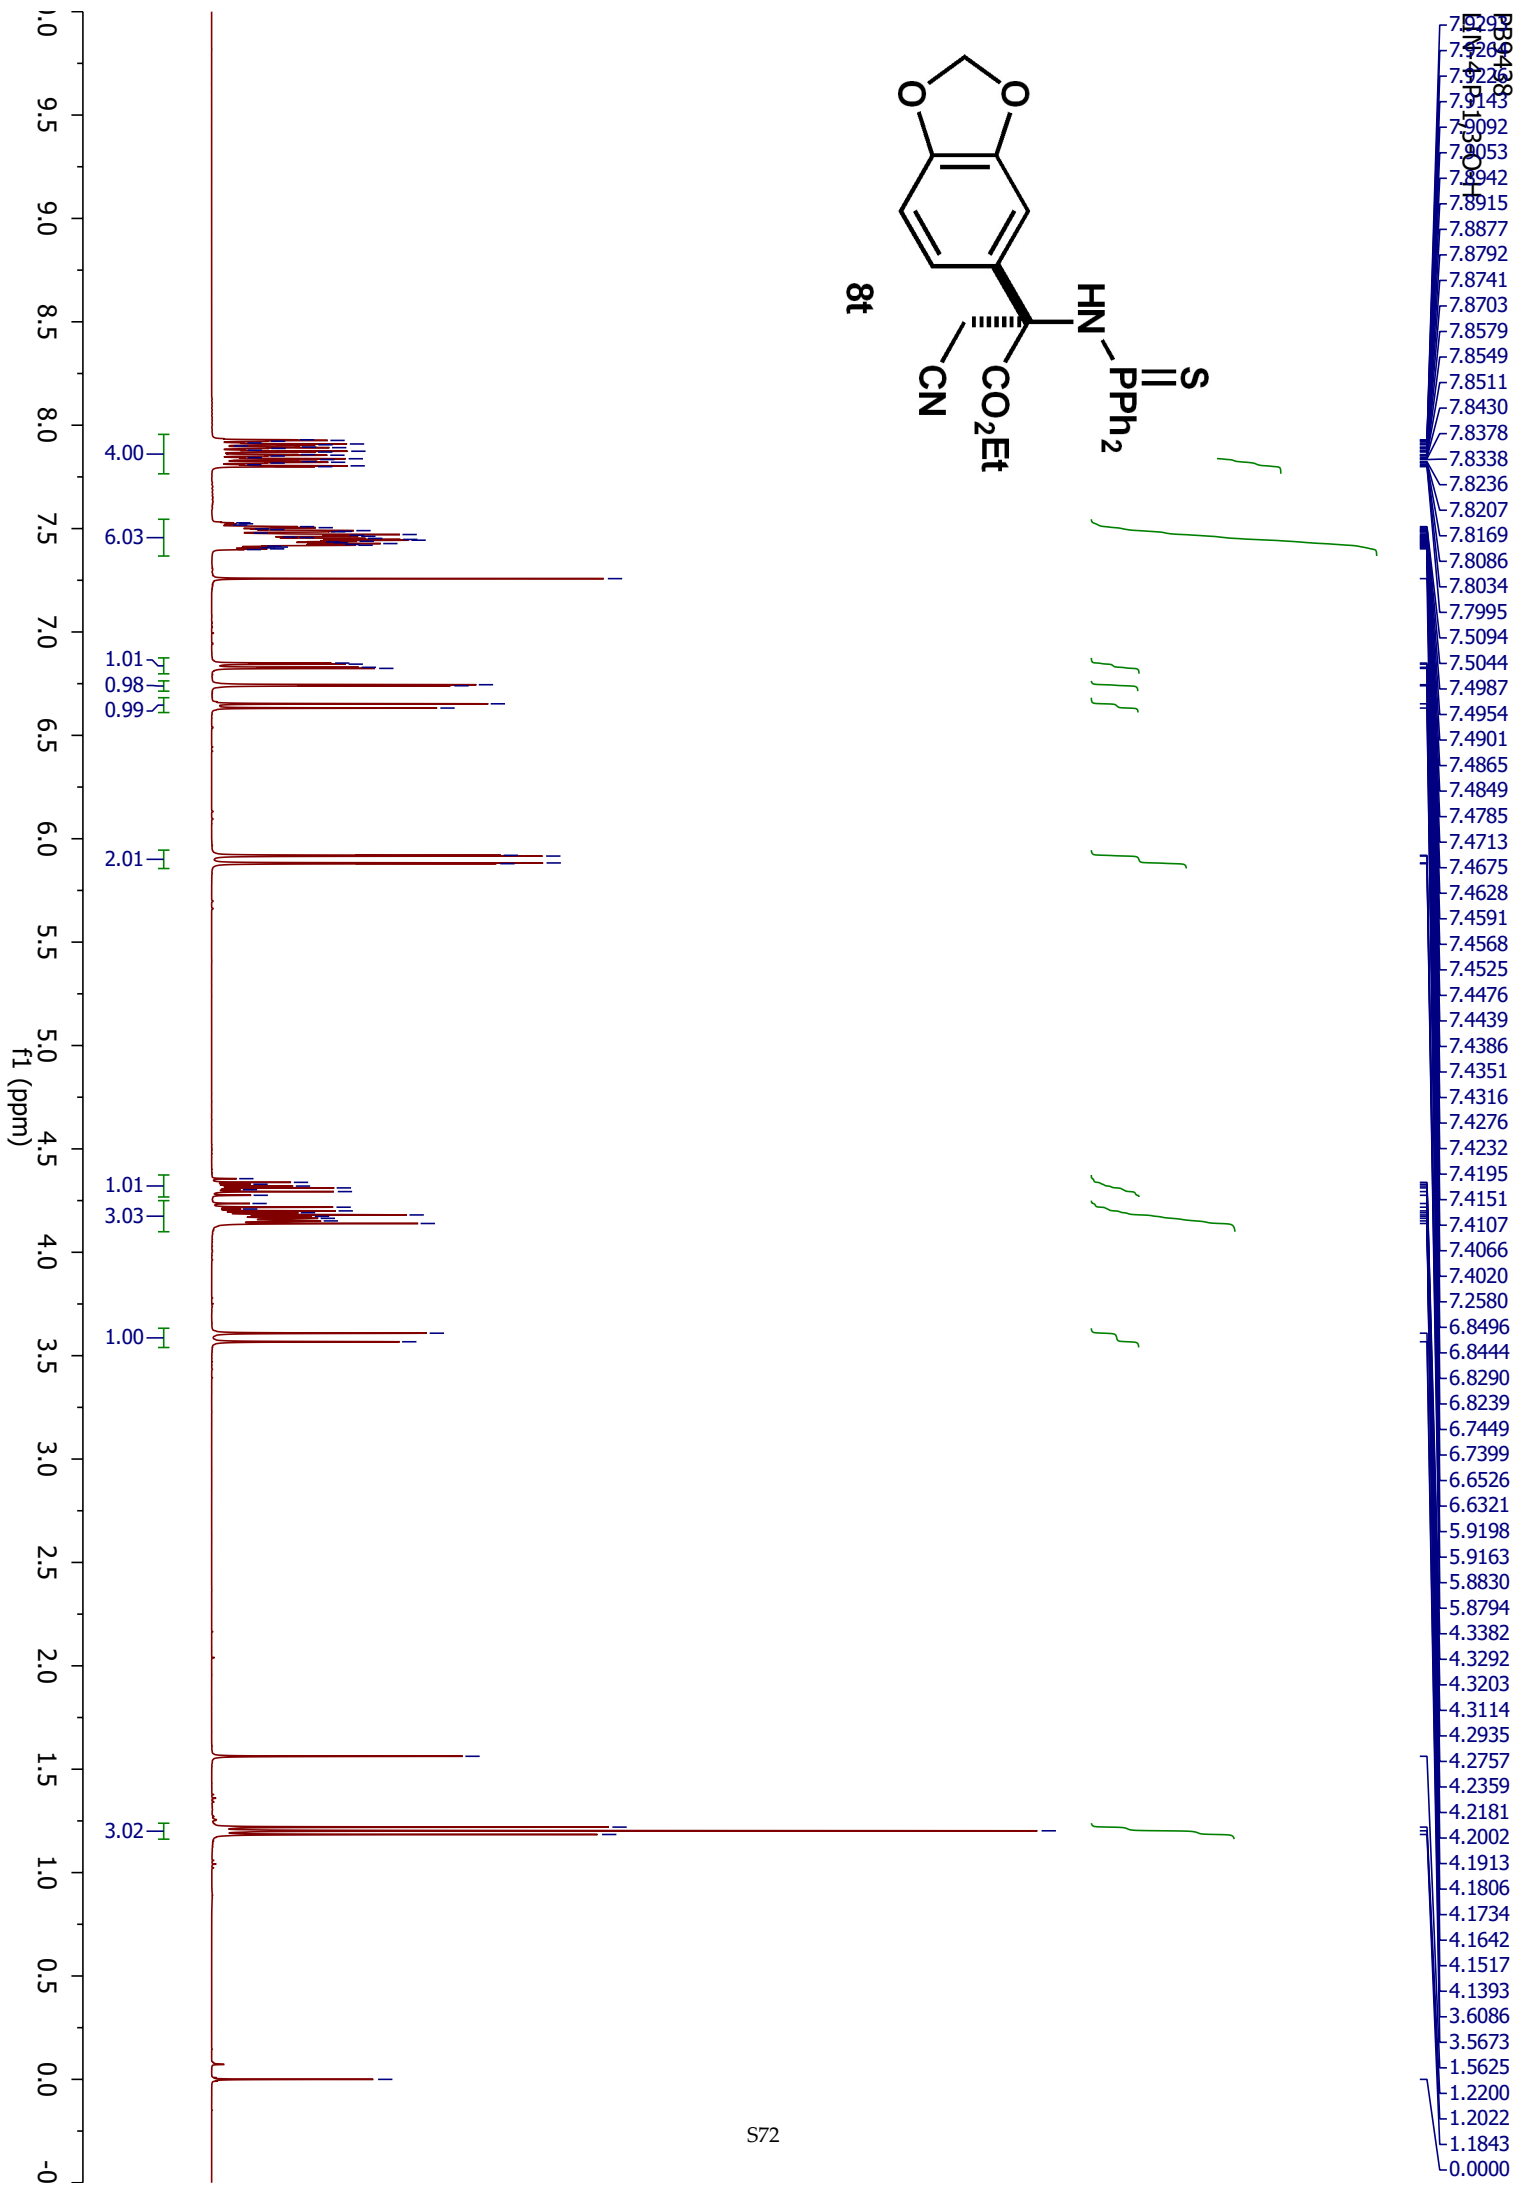



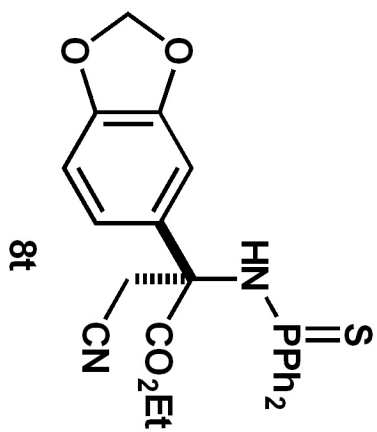

171.6905  
171.6270

147.9351  
147.8001

132.2404  
132.1260  
131.8500  
130.7184  
130.6047  
128.7709  
128.6388  
128.2379  
128.1053  
119.8490  
116.9909

107.9496  
106.8487

101.4399

77.3174  
76.9998  
76.6820

64.8033  
63.1335

28.1609

13.7062



PB9437  
LIN-4-11-16

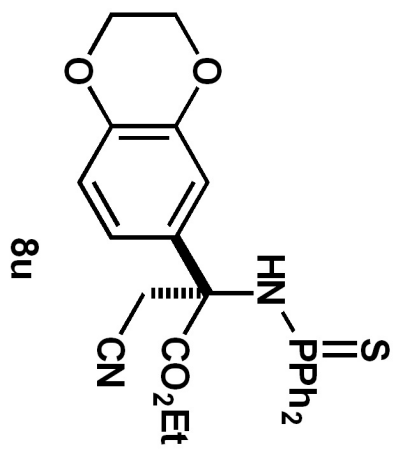

- 7.9823
- 7.9749
- 7.9610
- 7.9155
- 7.9074
- 7.8945
- 7.8899
- 7.8861
- 7.8507
- 7.8384
- 7.8335
- 7.8296
- 7.8165
- 7.8040
- 7.7992
- 7.7953
- 7.4450
- 7.4400
- 7.4367
- 7.2582
- 6.8458
- 6.8399
- 6.8276
- 6.8215
- 6.8064
- 6.8003
- 6.7127
- 6.6915
- 4.3294
- 4.3205
- 4.3115
- 4.3026
- 4.2847
- 4.2669
- 4.2312
- 4.2134
- 4.2041
- 4.1951
- 4.1873
- 4.1753
- 4.1688
- 4.1628
- 4.1581
- 4.1509
- 4.1266
- 4.1019
- 4.0854
- 3.6137
- 3.5722
- 1.5674
- 1.2141
- 1.1962
- 1.1784
- 0.0000

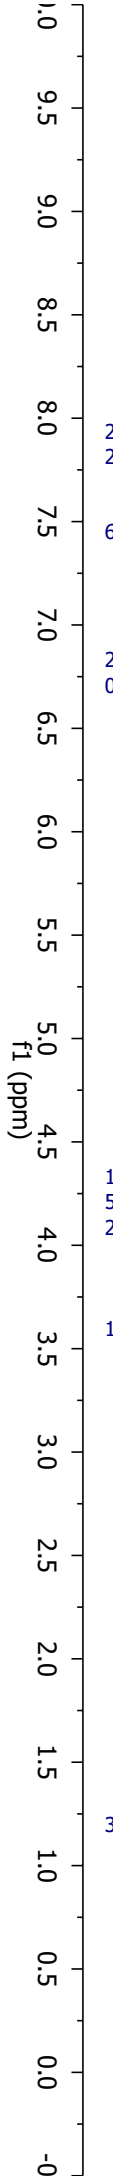

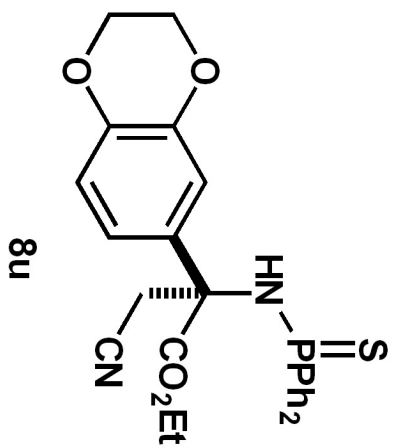

171.6807  
171.6210

143.8991  
143.2321

132.2553  
132.1410  
130.7323  
130.6181  
128.7291  
128.5971  
128.2512  
119.0268  
117.2925  
117.0561  
115.4078

77.3178  
77.0002  
76.6825

64.5375  
64.2426  
64.2070  
63.0065

28.1631

13.7014



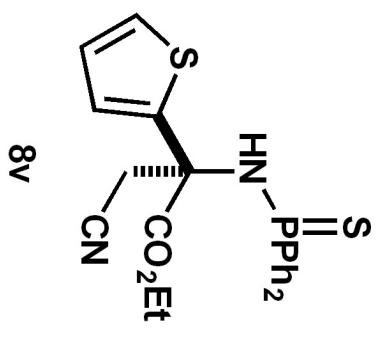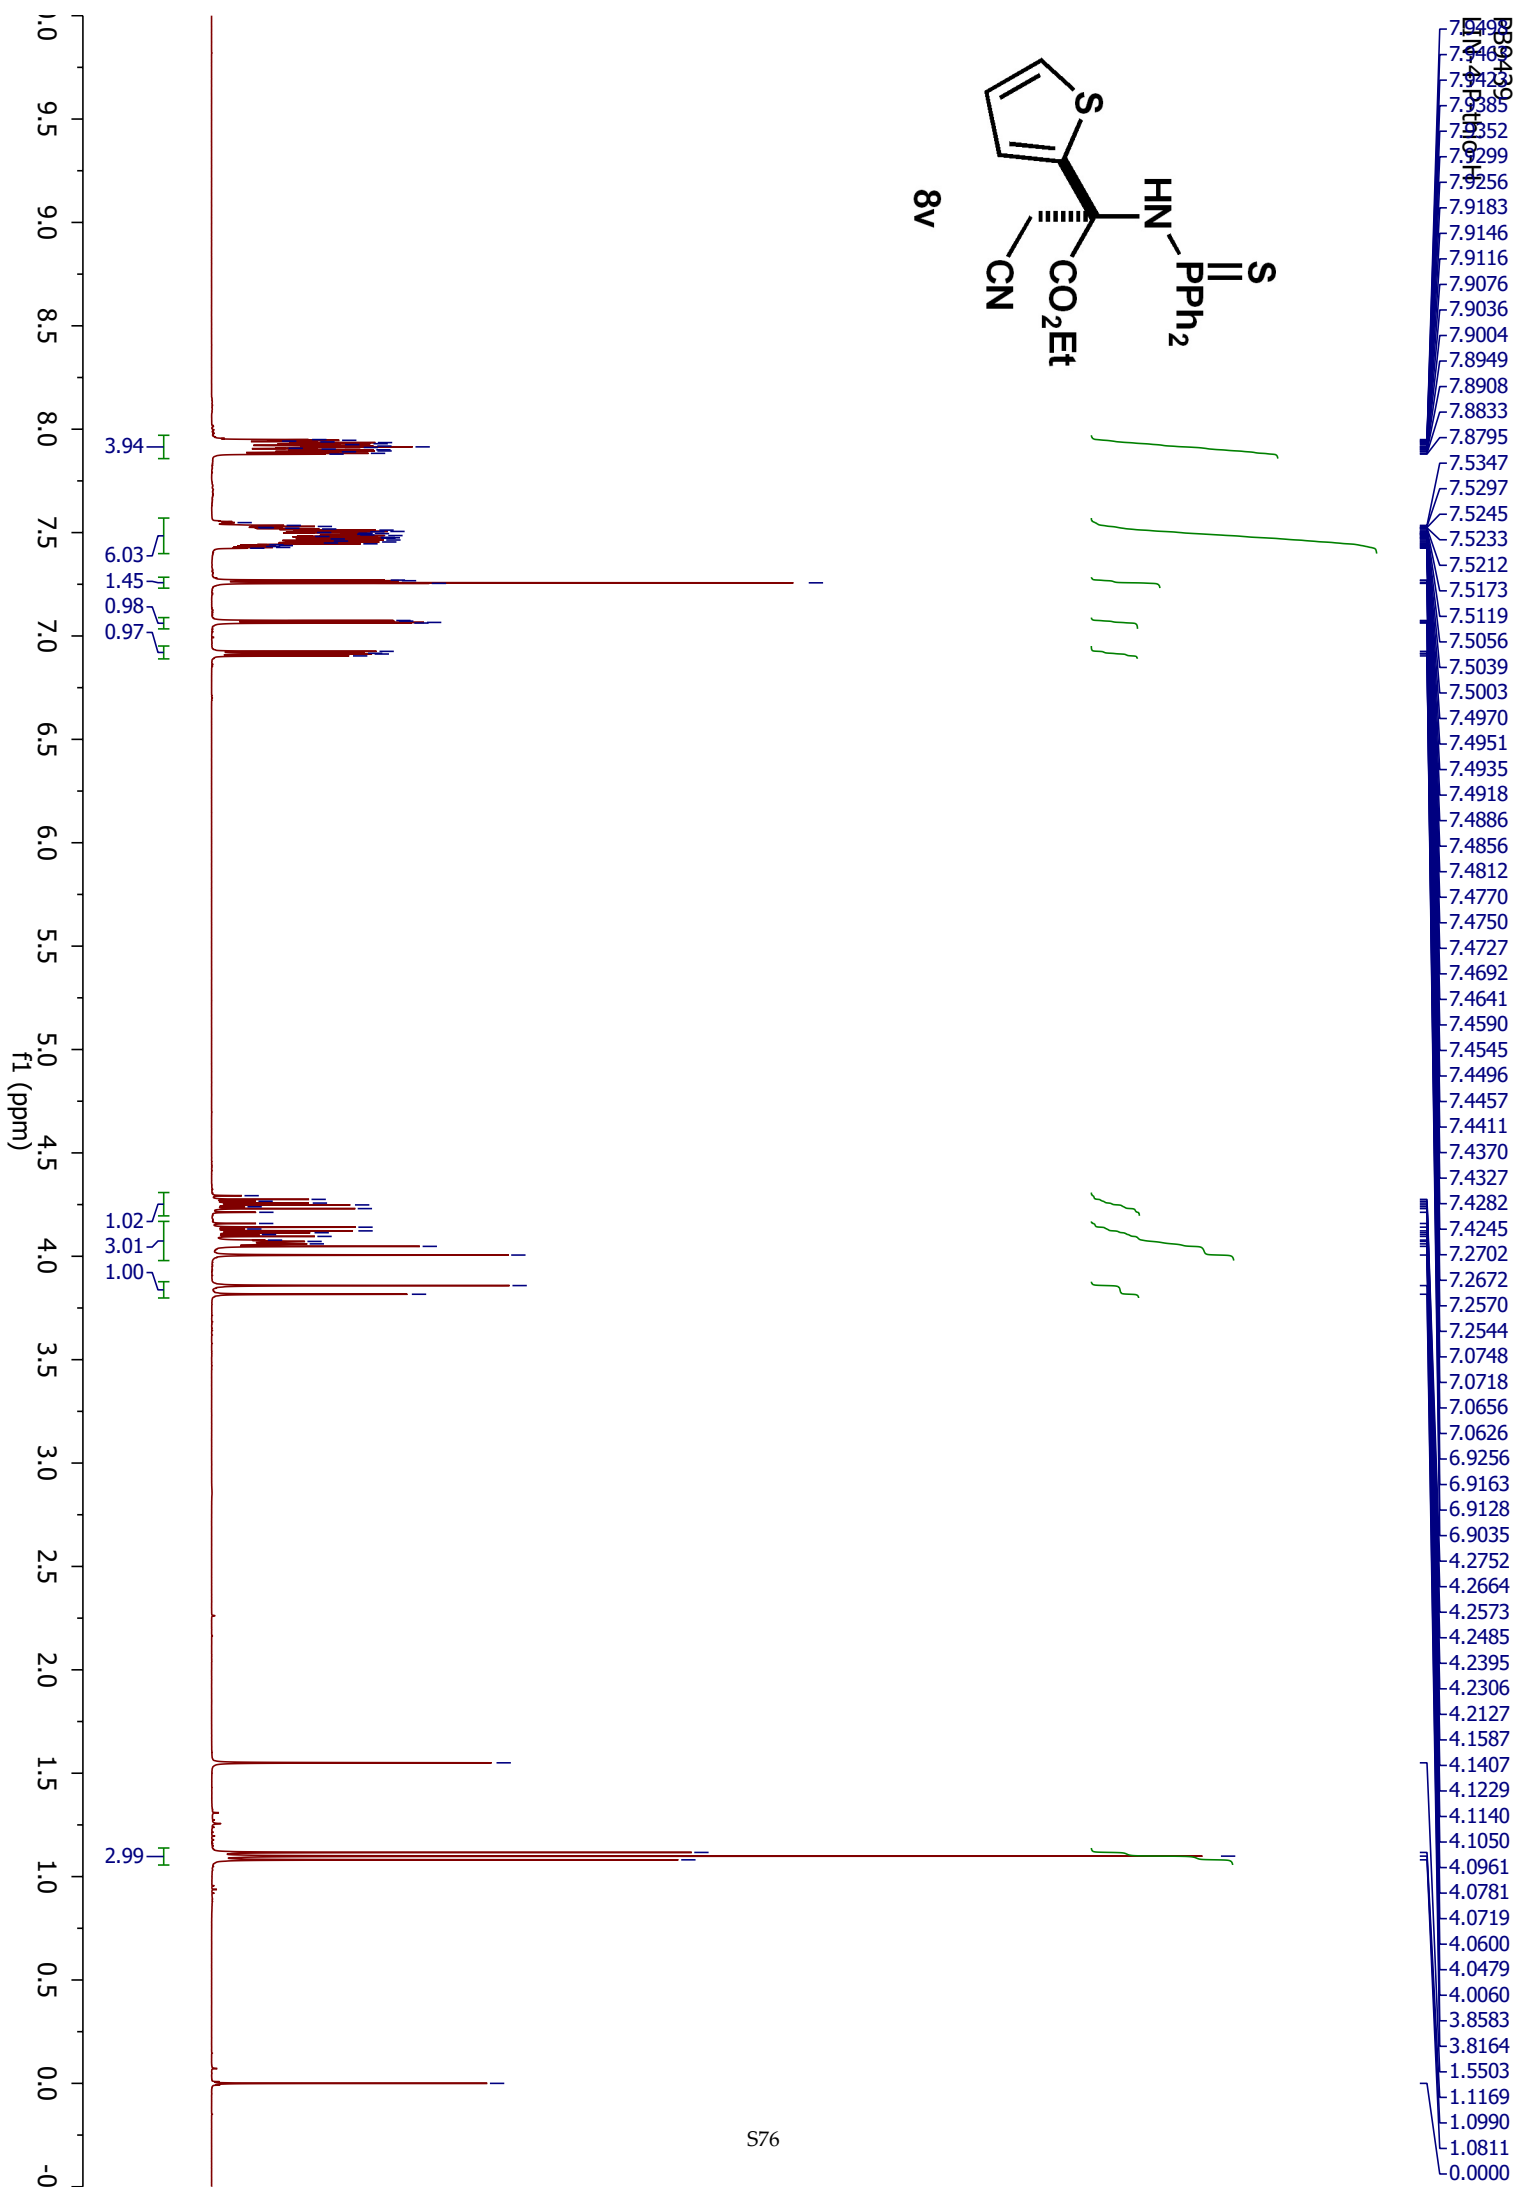

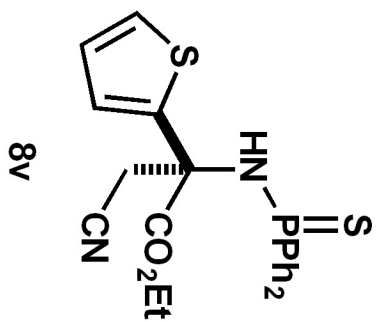

170.1914  
170.1510

142.4159  
142.3244

131.8025  
131.6872  
131.0981  
130.9830  
128.6315  
128.5937  
128.4977  
128.4607  
116.8357

77.3178  
77.0002  
76.6826

63.1717  
63.0556

29.3518

13.4568

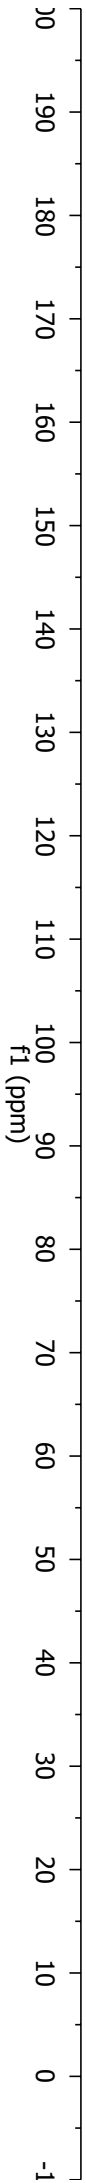

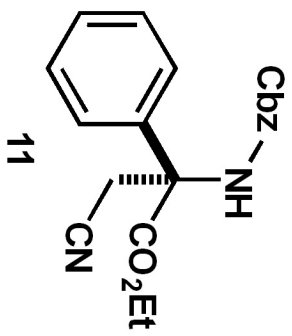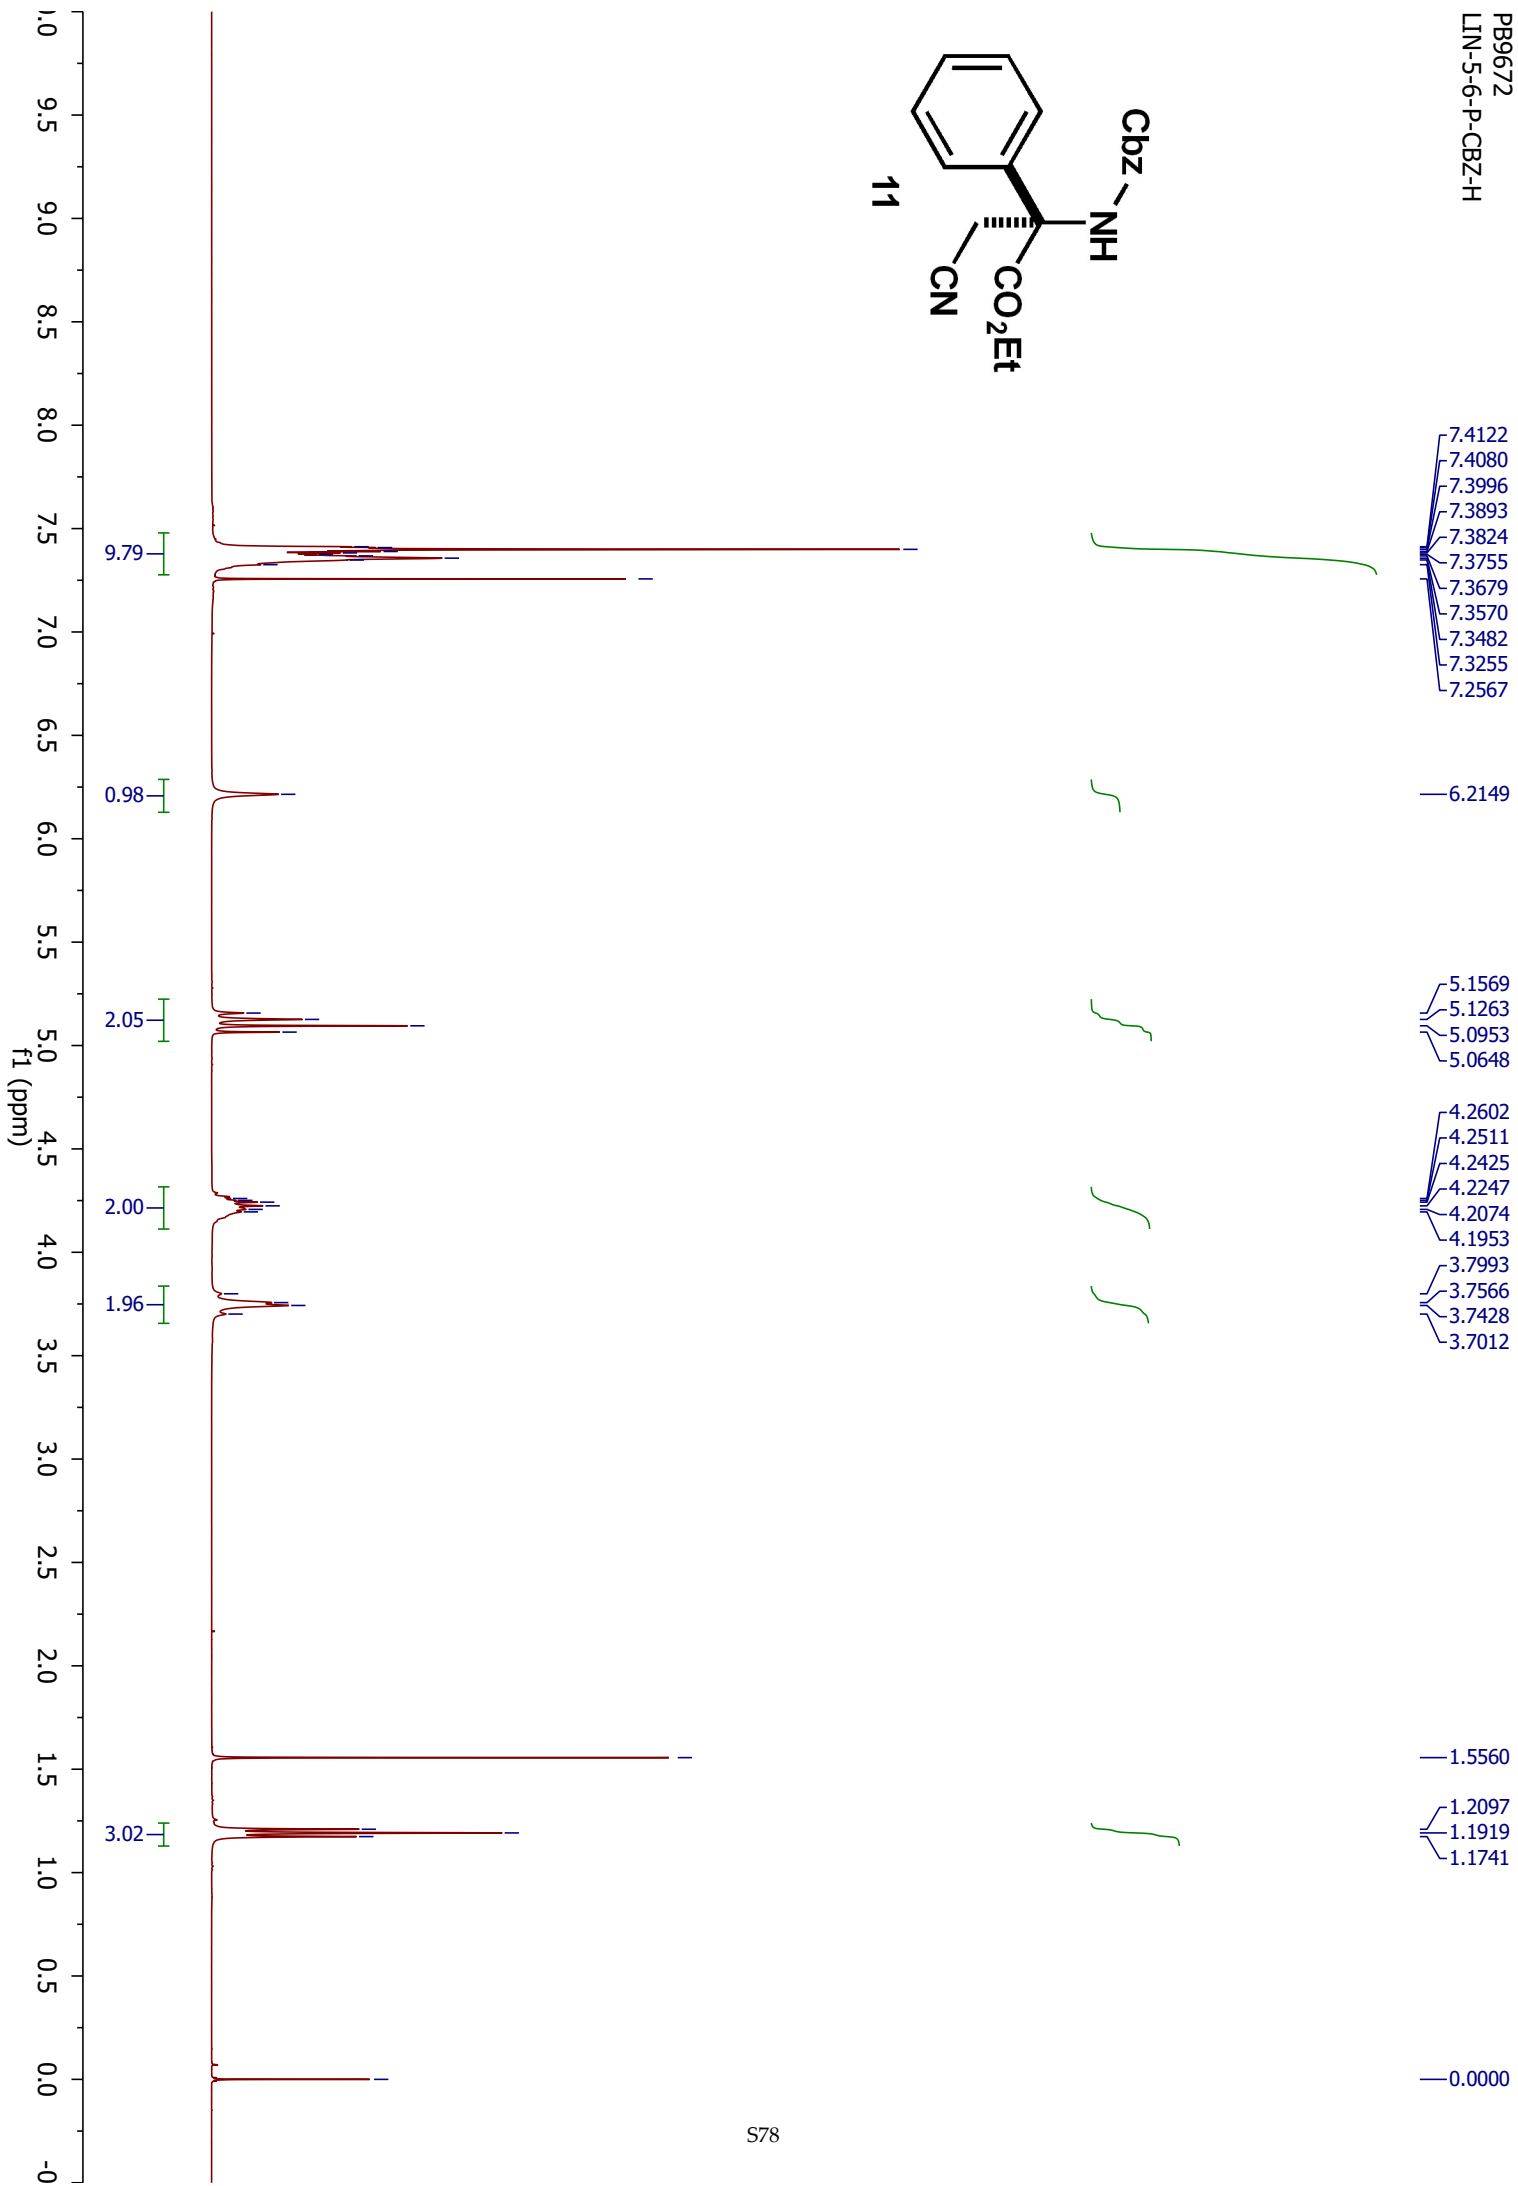

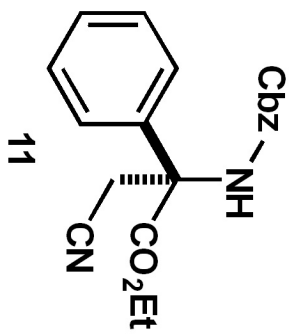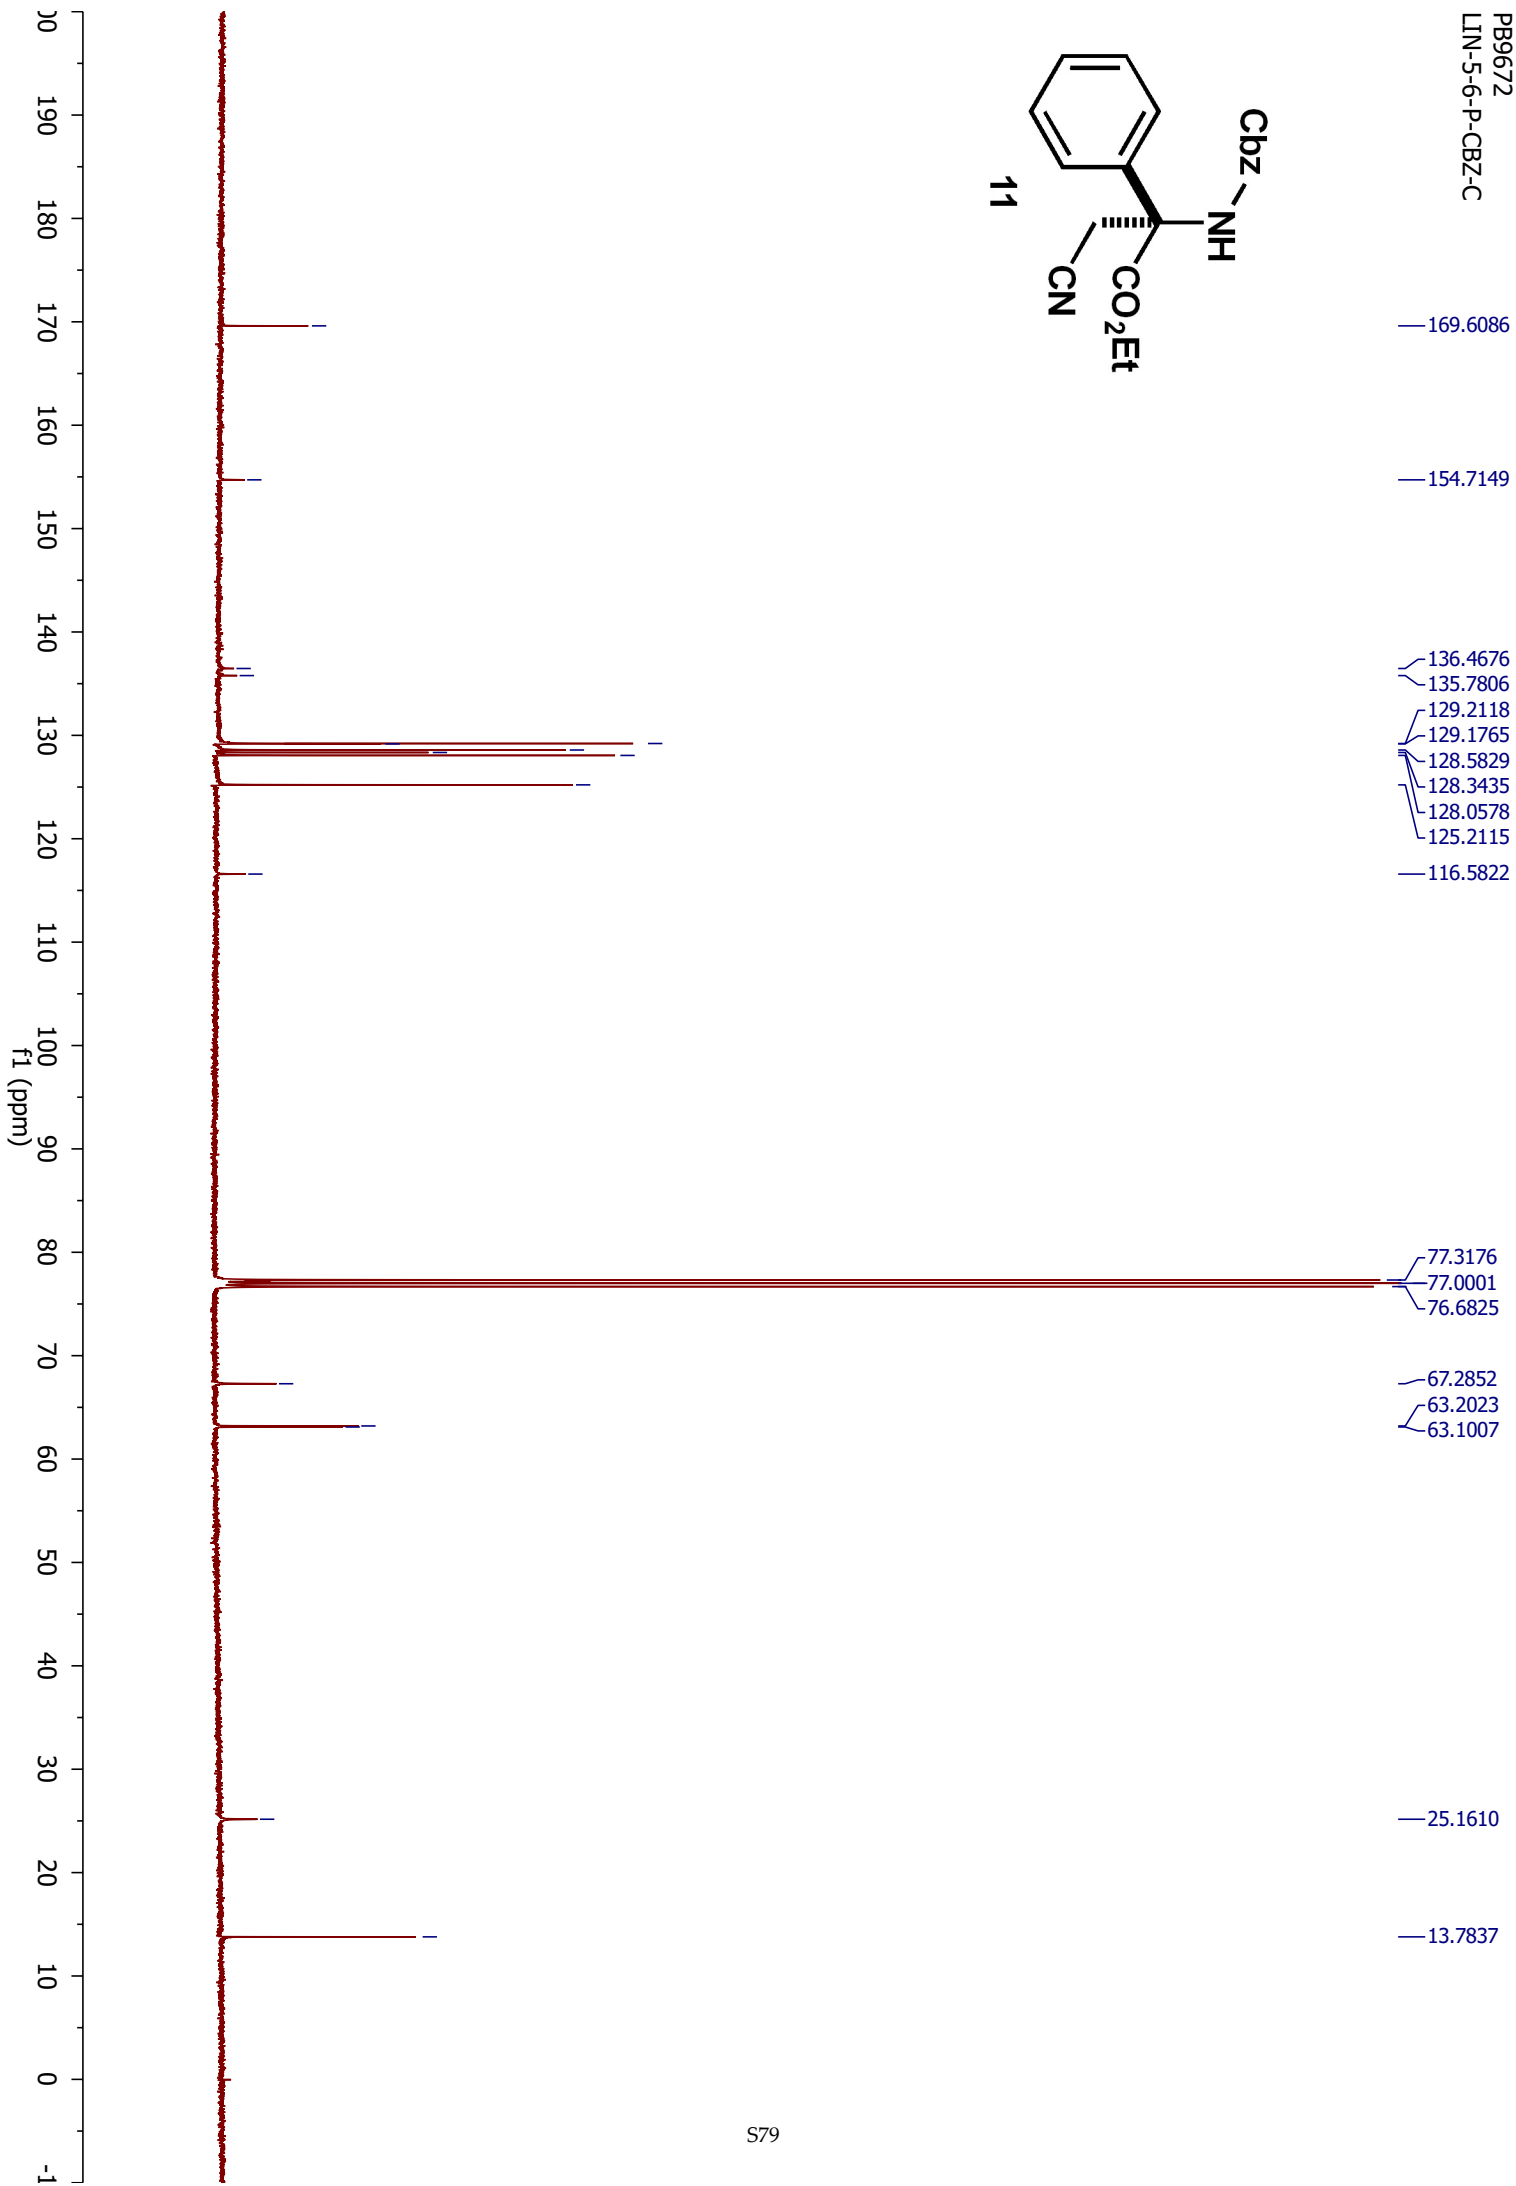

Supplement: c6ob01874b1.pdf [file c6ob01874b1.pdf]
